# Supplementary material for: Synaptic deregulation of cholinergic projection neurons causes olfactory dysfunction across 5 fly Parkinsonism models
Source: bioRxiv preprint, doi:10.1101/2023.03.11.532176, version 3 (2024-12-17)
Supplement: Supplemental File 7 [file 532176_file19.xlsx]

## Sheet: Summary
human NBM						Fly DEGs common to 5 olfactory impaired mutants						overlap
gene	pvals_adj	logfoldchanges				top 500 upregulated	top 500 downregulated					human symbol	fly symbol
MALAT1	2.07231e-114	0.890174				Ubi-p5E						ABI2	Abi
OPCML	5.82892e-113	1.04307				Snap25						ACAP2	CenB1A
LINC00486	1.92896e-88	0.48772				sif						ACHE	alpha-Est9
AC124312.2	1.3964e-86	1.07798				Nrx-1						ACTG1	Act5C
SLC24A2	4.20551e-82	1.18041				mt:ND5						ADAM10	kuz
ZNF385B	4.31837e-79	1.39007				fz2						ADAM12	Meltrin
ZDHHC11B	8.02929e-77	1.26121				asRNA:CR44030						ADAM12	mmd
AC105402.3	1.48767e-75	1.73514				Dora						ADAM17	Tace
ATRNL1	7.10188e-74	0.830825				Hs3st-A						ADAM19	Meltrin
SNAP25-AS1	1.80483e-65	0.881697				Ubr1						ADAM19	mmd
LINC01481	2.6506e-65	-0.874928				Vha16-1						ADAM22	mmd
AC010127.1	2.21537e-62	0.968526				ox						ADAM22	Meltrin
ARL17B	7.21979e-58	0.846513				tou						ADAM23	mmd
LARGE1	2.5281e-53	0.688909				brp						ADAM9	Meltrin
AC016042.1	6.00579e-53	1.17228				CASK						ADAM9	mmd
GABRB2	1.25891e-52	0.733995				EndoA						ADAMTSL1	nolo
SCN1A	4.42511e-52	0.703251				para						ADCY1	rut
SAMD5	3.12494e-51	1.03446				CG6700						ADGRL2	Cirl
LDB2	1.14759e-50	0.863814				Syt7						ADGRL3	Cirl
RGS7BP	4.8693e-50	0.852408				bol						ADSS	AdSS
ATP2B1	6.03525e-50	0.635264				mAChR-A						ANKRD17	mask
RYR3	7.16829e-49	0.943268				CaMKII						ANKRD50	CG10011
ASTN2	2.45675e-46	0.736239				CG42258						AP1G2	AP-1gamma
PRKCB	2.79557e-46	0.767325				UbcE2H						ARHGAP10	Graf
ITPR1	4.93928e-45	0.7944				CG12605						ARHGAP26	Graf
NTM	1.55345e-43	0.70525				CG17839						ARHGEF4	RhoGEF3
VPS13A	2.15447e-43	0.672983				Toll-6						ARHGEF9	RhoGEF3
SNAP25	6.48324e-43	0.475792				futsch						ARL17B	Arf79F
STXBP5-AS1	1.00419e-42	0.92934				capu						ARNT2	tgo
FAM135B	1.68636e-42	0.686388				Dscam2						ARNTL	gce
ELL2	4.61477e-42	1.19925				Ca-alpha1T						ARPP21	enc
KCTD16	7.56755e-42	0.660166				GABA-B-R1						ATL1	atl
ADCY1	2.16147e-41	0.77798				sno						ATL2	atl
AL117190.2	1.21589e-40	0.612437				qvr						ATP1A1	Atpalpha
PLEKHA5	7.50795e-40	0.53886				Sin3A						ATP6V0B	VhaPPA1-1
RYR2	3.14233e-39	0.665691				His3.3B						ATP6V1H	VhaSFD
AC015923.1	6.18883e-39	0.778185				psq						AUTS2	tay
AL033504.1	1.32897e-38	0.938827				siz						BAZ2B	tou
AC063944.1	1.63466e-38	1.10135				CG42750						BZW2	kra
CNTN4	2.79402e-38	0.689275				CG11000						CACNA1A	Ca-alpha1D
LINC00513	4.00063e-38	0.695535				mei-P26						CACNA1B	Ca-alpha1D
MGAT4C	5.55449e-38	-0.93405				Atg17						CACNA1C	Ca-alpha1D
CIT	1.02151e-37	0.635323				Mnn1						CACNA1D	Ca-alpha1D
DDX3P1	2.67802e-37	0.65662				CG42450						CACNA1E	Ca-alpha1D
GUCY1A2	1.08941e-36	0.650831				Hsp70Ab						CACNA2D3	Ca-Ma2d
AC027288.3	1.46684e-36	0.734913				CG31688						CADPS	Cadps
AC090579.1	5.14798e-36	1.06782				Galphao						CAMK2D	CaMKII
EPB41L2	5.35806e-36	0.730091				crc						CCNI	CycG
CTNNA3	6.66889e-36	0.661881				Alk						CCNY	CycY
STXBP5L	3.50384e-35	0.531526				tty						CDK14	Eip63E
DGKI	1.03207e-34	0.548311				Frq2						CDS1	Cds
SH3GL2	2.40865e-34	0.601499				Atpalpha						CERS6	schlank
SNTG2	2.89074e-34	1.41578				Lar						CHRM2	mAChR-A
GRIA3	1.03723e-33	0.589045				Shab						CHRM3	mAChR-A
CDKL5	1.03723e-33	0.622709				mRpS5						CHST1	CG31637
GRIN2A	1.1282e-33	0.629941				lncRNA:CR45054						CLIP1	CLIP-190
CADM1	1.15705e-33	-0.509426				larp						CPLX1	cpx
AFF3	1.15705e-33	0.539445				kek2						CREM	CrebB
LINC02389	1.29651e-33	0.80317				CG32767						CRTC3	Crtc
BCYRN1	1.65642e-33	0.588769				Trf2						CUX2	ct
ARHGAP10	2.37943e-33	1.42726				Tob						CYB561	CG1275
KIAA1217	2.96926e-33	0.727842				Rdh						DGKB	Dgk
MIR124-2HG	4.23153e-33	0.833523				bel						DGKH	CG34384
CACNB4	1.22664e-32	0.749679				NFAT						DHX32	Dhx15
MTATP6P1	1.53462e-31	0.785594				tun						DIP2B	DIP2
ZMAT4	1.6022e-31	0.773323				CG11155						DLG1	dlg1
FRG1HP	1.79118e-31	0.510147				CG43736						DMD	Dys
PEAK1	7.78527e-31	0.569175				side-III						DNAJC2	CG10565
GRM3	1.07735e-30	0.712038				Bicra						DPP10	CG45002
CAMK1D	3.48609e-30	0.554082				Snap24						DPP6	CG45002
VLDLR-AS1	3.68889e-30	0.756207				Abl						DPY19L1	CG6659
PPP2R2B	4.09741e-30	0.473807				Dyrk3						DSCAM	Dscam4
CDK14	5.84335e-30	0.524218				Rab11						DSCAM	Dscam1
LDLRAD4	5.84744e-30	0.604628				Prosap						DSCAM	Dscam2
PLCB1	1.0999e-29	0.518872				lncRNA:roX2						DYNLL1	ctp
TESPA1	1.4385e-29	2.45883				trx						EEF1A1	eEF1alpha2
SYN3	1.86497e-29	0.558859				dco						EEF1A2	eEF1alpha2
KCND2	2.07643e-29	0.53198				Msp300						EFR3B	stmA
OXR1	2.22676e-29	0.61659				Rbp6						EHMT1	G9a
COL25A1	5.33836e-29	0.712066				ps						EIF4A2	eIF4A
CNKSR2	6.36723e-29	0.533109				CanA-14F						ELL2	Su(Tpl)
SUMF1	8.25291e-29	0.569066				Gprk2						EPHA3	Eph
ARNT2	1.10552e-28	0.548076				mt:srRNA						EPHA4	Eph
PDE5A	2.01694e-28	0.612213				ttv						EPHA5	Eph
CDK6	2.25768e-28	0.722512				CG2924						EPHA6	Eph
DLGAP1-AS5	2.64055e-28	1.03062				mmd						EPHA7	Eph
FAT3	2.7422e-28	0.60609				bun						EPHB6	Eph
MGST1	4.69952e-28	0.744737				nAChRbeta1						ERAP1	Psa
KCNK1	5.74584e-28	0.78256				ctrip						ERAP1	CG4467
CALY	9.05882e-28	-0.858493				norpA						ERC1	brp
CCDC3	1.68505e-27	0.643369				Gbs-76A						ERC2	brp
PEG10	1.69858e-27	-0.942712				nocte						ETV6	aop
CACHD1	1.69858e-27	0.621077				pigs						EXT1	ttv
GALNT17	2.37588e-27	0.491439				Rim						EYS	eys
NRGN	3.35273e-27	0.673402				ctp						FAM214A	CG9005
ROBO1	8.2872e-27	-0.31628				Rbp						FBXL20	CG9003
EPB41	8.44021e-27	0.768189				e(r)						FBXO32	CG11658
CELF2	9.07978e-27	0.51516				CG31998						FMN1	capu
MYH10	1.05886e-26	0.498162				crol						FMN2	capu
ARPP21	1.29459e-26	0.572473				14-3-3zeta						FMNL2	Frl
B3GLCT	1.83196e-26	0.880669				Ca-alpha1D						FOXP1	FoxP
CHRM3	2.67578e-26	0.641368				Nlg2						GALNT14	Pgant2
RBMS1	2.80596e-26	0.799711				hang						GLS	GLS
ADAM23	2.8725e-26	0.46236				CG42795						GNAI2	Galphao
KCNAB1	4.78572e-26	0.574149				Hsp83						GNAL	Galphas
SCN8A	6.07226e-26	0.45557				Dhit						GNAO1	Galphao
CTNND2	1.1084e-25	0.396094				nAChRalpha1						GNAS	Galphas
AC022639.1	1.15844e-25	0.784477				lncRNA:CR45758						GNB5	Gbeta5
AP001831.1	1.21852e-25	0.668101				CG42594						GNG2	Ggamma1
LY6H	1.24056e-25	-0.938857				Corin						GNG7	Ggamma1
ANKUB1	1.41019e-25	0.624436				mt:ND4						GNPTAB	CG8027
MTUS2	1.88245e-25	0.518678				Dscam4						GRIA3	GluRIA
AL669831.3	2.97328e-25	0.492886				Crtc						GRIA3	GluRIB
ANO3	3.60404e-25	0.631773				heph						GRIA4	GluRIB
KANSL1	3.65528e-25	0.475483				Dys						GRIA4	GluRIA
CDH18	3.65528e-25	0.55361				pasha						GRID1	CG11155
HS6ST3	4.52049e-25	0.611063				RapGAP1						GRIK2	CG11155
ARHGAP32	5.40066e-25	0.450072				Syp						GRIK3	CG11155
SYNDIG1	6.03785e-25	0.701111				lgs						GRK4	Gprk2
PTPRT	8.12443e-25	0.573884				scrt						GRM1	mtt
CCNY	1.42618e-24	0.461646				Glut4EF						GRM3	mtt
MIAT	1.54598e-24	0.536865				tna						GRM5	mtt
AC090709.1	1.94243e-24	0.664189				sdt						GRM8	mtt
SPOCK1	3.61324e-24	0.509961				upSET						GSR	Trxr-1
PCDH9-AS2	4.02246e-24	0.683063				kis						GUCY1A1	Gycalpha99B
AC104827.1	4.85879e-24	0.7377				mtt						GUCY1A2	Gycalpha99B
LINC00599	8.23429e-24	0.599348				qm						H3F3B	His3.3B
KIAA1211L	9.15915e-24	0.597078				Kr-h1						HECTD2	Herc4
RAPGEF5	1.7016e-23	0.54033				CG14440						HERC3	Herc4
TTLL11	2.01311e-23	0.612564				CG3726						HMGB1	HmgD
ANKRD33B	2.13257e-23	0.788282				CG10543						HNRNPK	HnRNP-K
AQP4-AS1	2.50093e-23	0.677531				PRL-1						HOOK1	hook
NELL2	4.32847e-23	0.532799				CG13954						HOOK2	hook
DLGAP1-AS4	4.58465e-23	0.900792				lncRNA:noe						HPCA	Nca
CEP126	6.64684e-23	0.544886				Pgant2						HS3ST5	Hs3st-A
AC069437.1	7.43921e-23	0.559446				ari-1						HSP90AB1	Hsp83
SMAD3	9.85328e-23	0.690244				wry						HSPA5	Hsc70-4
DLGAP1	1.03973e-22	0.537874				CG10011						IQSEC1	siz
TANC2	1.39648e-22	0.403698				CG9003						IQSEC2	siz
AL359706.1	1.41979e-22	0.760044				LRP1						IQSEC3	siz
ROCK2	1.45487e-22	0.436813				E(Pc)						ITFG1	CG7739
ZBTB20	1.54362e-22	-0.507624				Ssdp						ITM2B	CG3662
TESC	1.64232e-22	1.20632				Rab35						ITM2C	CG3662
PLCL2	1.79599e-22	0.511337				eys						JARID2	Jarid2
CDH8	2.43385e-22	0.498057				rdgB						KCNB1	Shab
AC120193.1	2.60293e-22	0.693402				Snx27						KCNC2	Shawl
ARAP2	3.22639e-22	0.615875				pyd						KCNH1	eag
FAM13A	5.46333e-22	0.615809				Dg						KCNIP1	CG44422
NETO1	6.02368e-22	0.523021				GluClalpha						KCNIP2	CG44422
BRINP1	1.14781e-21	0.484093				CG30428						KCNIP4	CG44422
PCP4	1.1902e-21	0.853696				Ih						KCNN2	SK
UBE3A	1.26522e-21	0.415783				l(3)80Fg						KCNN3	SK
NUP93	1.27074e-21	0.538473				mask						KHDRBS2	qkr58E-2
FRMPD4	1.56183e-21	0.50914				wts						KHDRBS2	qkr58E-3
SLC22A23	3.08162e-21	0.520757				tau						KHDRBS3	qkr58E-2
SH3BGRL2	3.08162e-21	0.562515				unk						KHDRBS3	qkr58E-3
PRLR	3.26411e-21	-1.20001				wge						KIAA0930	CG9646
CADM2	4.23802e-21	0.420403				Dab						KIF13A	Khc-73
KCNMA1	5.1972e-21	0.413942				CG11122						KMT2E	upSET
PPP1R16B	5.51738e-21	0.544948				osa						LARP1	larp
TSPAN5	6.1245e-21	0.465042				trn						LCORL	Eip93F
NPAS2	6.26023e-21	0.510652				Rbfox1						LEMD3	MAN1
DLC1	6.86015e-21	0.54177				CG43102						LPCAT4	LPCAT
PCSK1N	9.07831e-21	-0.85718				Toll-7						LRP1	LRP1
ADAMTS3	1.03914e-20	0.944517				CG4080						LRP1	mgl
GNAS	1.20844e-20	-0.617527				CG12531						LRP1B	LRP1
HIVEP2	2.25785e-20	0.441212				Cadps						LRP1B	mgl
AC011477.1	2.31793e-20	0.572649				Eip63E						LRRN1	trn
RIC8B	3.24956e-20	0.602915				Mkp3						MAD1L1	Mad1
PCSK6	3.71141e-20	1.03137				Tdg						MAN1A1	alpha-Man-Ia
FMN2	4.91181e-20	0.421162				mam						MAN1A1	alpha-Man-Ib
SLC38A11	5.20082e-20	1.91669				CBP						MAN1A2	alpha-Man-Ia
MSRA	5.7982e-20	0.472993				clu						MAN1A2	alpha-Man-Ib
CABP1	7.08657e-20	0.703968				PCB						MAN2A2	alpha-Man-IIb
ADD2	9.2054e-20	0.451199				Cp110						MAP1A	futsch
PTPRD	9.78443e-20	0.516853				side-VI						MAPKBP1	Wdr62
LNX1	1.11167e-19	0.631424				Fife						MAPT	tau
CHN1	1.14783e-19	0.389394				CG32432						ME3	Men-b
R3HDM1	1.22451e-19	0.402042				Su(dx)						ME3	Men
STRBP	1.49945e-19	0.433914				Eip74EF						MEF2C	Mef2
FOCAD	1.66435e-19	0.407844				anne						MFSD11	CG18549
NIN	1.86066e-19	0.450078				Hsc70Cb						MINDY3	CG7332
GPRIN3	1.98569e-19	0.758684				rno						MMP16	Mmp2
AC023590.1	2.11855e-19	0.55047				CG12851						MYO18A	Mhcl
THSD4	2.20672e-19	0.870432				mtd						MYO5A	didum
LINC02137	2.22241e-19	1.42624				CG14442						NCALD	Nca
NUTM2A-AS1	2.33164e-19	0.516253				Ptp36E						NCK2	dock
RASAL2	3.00867e-19	0.401581				tipE						NCOA7	mtd
PDE10A	3.86979e-19	0.609148				CG44422						NDFIP2	Ndfip
ROBO2	5.20508e-19	0.54322				fend						NDRG4	MESK2
PPM1L	5.3672e-19	0.462319				Cirl						NDRG4	CG2082
ZNF385D	5.71601e-19	0.517001				NfI						NDST3	sfl
RAVER2	8.75317e-19	0.594649				Shawl						NDUFS1	ND-75
MLLT3	1.68039e-18	0.412209				Ptp99A						NEDD4L	Su(dx)
HLF	2.15504e-18	0.651433				Ubr3						NEDD9	p130CAS
MCTP1	3.06432e-18	0.456721				dsh						NFATC2	NFAT
LMO3	3.37583e-18	0.509469				rut						NFIB	NfI
AC090578.1	3.39126e-18	0.605346				RhoGAP100F						NFIX	NfI
ARHGAP6	3.44242e-18	-0.679331				kuz						NFYC	Nf-YC
GPR158	3.9855e-18	0.417156				Octalpha2R						NLGN2	Nlg3
SLC25A27	5.88673e-18	0.631292				Pde6						NLGN2	Nlg2
AC006148.1	6.93257e-18	0.431166				Hex-A						NLGN4Y	Nlg3
TIMP3	1.40359e-17	0.61756				RNaseMRP:RNA						NLGN4Y	Nlg2
EYS	1.41845e-17	0.853885				mt:ATPase8						NRXN3	Nrx-1
DUBR	1.49981e-17	0.495179				Khc-73						NUMB	numb
CELF2-AS2	1.63727e-17	0.673244				GluRIB						OPHN1	Graf
COBL	2.32391e-17	0.482413				CG33303						OSBP2	CG3860
HECW1	2.66114e-17	0.41547				PIG-T						OSBPL1A	CG3860
MICAL2	2.66114e-17	0.575896				Hrb27C
ENTPD3-AS1	4.19187e-17	0.96144				Rgk1						OXR1	mtd
MYO5A	4.70931e-17	0.364962				mt:CoIII						PAK5	mbt
LIN28B	5.50194e-17	1.11471				Snoo						PANK3	fbl
SCG2	5.80291e-17	-0.834737				htk						PARG	Parg
IQCJ-SCHIP1	8.47939e-17	0.52971				RhoGAP93B						PATJ	CG15803
PKP4	8.7371e-17	0.384095				Patronin						PBX1	exd
DCAF6	8.75116e-17	0.458553				Nup153						PBX3	exd
ADAM10	1.04902e-16	0.507092				CG1275						PCBP3	mub
GPR63	1.11969e-16	1.05942				Nlg3						PCSK6	Fur2
PDE4D	1.12097e-16	0.410783				CG33229						PCSK6	Fur1
SRGAP1	1.16796e-16	0.573078				Syx1A						PCSK6	amon
SRPK1	1.21527e-16	0.565016				tapas						PDE5A	Pde6
XRRA1	1.58046e-16	0.55461				tara						PDXDC1	CG1486
PDE3B	1.5871e-16	0.49208				CG43850						PHACTR1	CG32264
DSCAM	1.62563e-16	0.478411				CG42855						PHACTR2	CG32264
PCDH11X	1.71055e-16	-0.642813				CG15431						PHACTR3	CG32264
EXTL2	2.37919e-16	0.958393				l(1)G0469						PHC2	ph-p
SYT7	2.5911e-16	0.577048				VAChT						PHC3	ph-p
DOCK4	2.92367e-16	0.385728				Plc21C						PKN2	Pkn
ATP2B2	2.92367e-16	0.391969				beat-IIa						PLCB1	Plc21C
ANXA11	3.31006e-16	0.75739				fs(1)h						PLCB1	norpA
SH3PXD2A	3.5017e-16	0.416895				wrd						PPP1R12B	Mbs
PODXL2	3.74605e-16	-0.833744				sws						PPP2R5C	wrd
ME3	3.74605e-16	0.414052				RpL41						PPP2R5C	wdb
NRG1	3.84981e-16	0.504611				Asap						PPP3CA	Pp2B-14D
SASH1	3.88071e-16	0.530014				Prp4k						PPP3CA	CanA-14F
KCTD8	4.39996e-16	0.469537				Mef2						PRKACB	Pka-C1
TRPM2	4.44943e-16	0.605005				Hers						PRKAR1B	Pka-R1
AC136759.1	6.72641e-16	0.480235				sfl						PRKAR2A	Pka-R1
SCN4B	6.72641e-16	1.33631				emb						PRKAR2B	Pka-R1
EPHA4	9.17678e-16	0.539455				CG11360						PRKCB	Pkc53E
ARNTL	1.00965e-15	0.70383				CG42402						PRKCH	Pkc98E
TTC39B	1.08304e-15	0.662388				CrebB						PTPN3	Ptpmeg
JPH1	1.31865e-15	0.716069				CG7637						PTPN4	Ptpmeg
NCKAP5	1.39593e-15	0.634075				nej						PTPRB	Ptp10D
ENTPD3	1.45514e-15	0.75515				Mhcl						PTPRD	Lar
MBNL2	1.4603e-15	0.377408				CG31221						PTPRG	Ptp99A
AL035685.1	1.82831e-15	0.614112				CG7139						PTPRK	Ptp36E
UBE2E2	1.98142e-15	0.368739				SKIP						PTPRO	Ptp10D
AP002370.2	2.0936e-15	0.516228				Glut1						PURA	Pur-alpha
RAP1GDS1	2.35032e-15	0.360217				CG9005						PURB	Pur-alpha
SLC35F3	2.43644e-15	0.5117				CG18467						PURG	Pur-alpha
TANC1	2.68095e-15	0.815676				AMPdeam						R3HDM1	enc
IMMP2L	2.90635e-15	-0.264128				LPCAT						RAB11A	Rab11
HOOK2	2.90635e-15	0.522463				CG14669						RAB26	Rab26
KCTD1	3.15813e-15	0.444065				mub						RAP1GAP	RapGAP1
GSG1L	3.17215e-15	0.58363				CG42613						RAPGEF1	C3G
LINC00632	3.71702e-15	0.347551				DIP2						RAPGEF4	Epac
PTPRM	3.71702e-15	0.413617				C3G						RAPGEF5	Epac
LRRK2	3.79076e-15	0.703633				CG8768						RASA1	vap
TTC37	3.98578e-15	0.388675				RhoGAP19D						RASGEF1B	CG4853
LMO7	4.00517e-15	0.53088				Cam						RB1CC1	Atg17
LINC01378	4.28935e-15	1.24014				CG15803						RBFOX3	Rbfox1
SLC8A1-AS1	4.42978e-15	0.458729				GluRIA						RCAN1	sra
MME	4.65361e-15	1.1872				CG31635						RCAN2	sra
STARD4	5.32531e-15	1.08796				MESR4						RHOBTB2	RhoBTB
CELF4	5.60132e-15	-0.202268				Eph						RHOT1	Miro
GRM1	6.07587e-15	0.450933				lncRNA:alphagamma-element:CR32865						RIMS3	Rim
FRMD5	6.22985e-15	0.408429				tay						RNF111	CG6923
JCAD	6.44315e-15	0.816462				lbk						ROBO1	robo1
PGAP1	7.07587e-15	-0.412594				Gug						ROBO2	robo1
LRP1B	7.10738e-15	0.454104				Asator						ROCK1	Rok
KCNA2	8.34114e-15	0.860012				mt:lrRNA						ROCK2	Rok
FBXW8	8.39224e-15	0.655804				nrm						RPL29	RpL29
RORA-AS1	8.70292e-15	0.762791				NaCP60E						RPL9	RpL9
FGF14	1.08801e-14	0.446443				CR32745						RPS16	RpS16
PRKAG2	1.12635e-14	0.390135				ssp3						RPS18	RpS18
MARCKS	1.31699e-14	-0.850509				robo1						SAMD5	SKIP
GABRG1	1.76664e-14	-1.03115				Sdc						SASH1	SKIP
PDXDC1	2.03454e-14	0.365205				Pgant9						SCN1A	para
HPCA	3.15303e-14	0.785415				CadN						SCN2A	para
HACE1	3.44017e-14	0.456736				CG33543						SCN8A	para
ARMC9	5.11212e-14	0.414632				CG34423						SCN8A	NaCP60E
HRH2	5.37354e-14	0.66019				e(y)3						SELENOI	CG33116
RPS6KC1	5.40445e-14	0.358789				Slik						SFSWAP	su(w[a])
HECW2	5.56202e-14	0.362787				spen						SH3BP5	pcs
GRM5	6.21839e-14	0.429				kek6						SH3BP5	CG14408
AL035427.1	6.80939e-14	0.717474				ths						SH3GL2	EndoA
AC019197.1	7.62669e-14	0.507631				Pkn						SHANK3	Prosap
KCNQ3	8.94006e-14	0.380678				Eip93F						SHOC2	Sur-8
C15orf41	8.96184e-14	0.467042				sky						SLC16A7	hrm
UNC13C	9.81253e-14	0.529487				Larp4B						SLC20A2	NaPi-III
KCNIP2-AS1	9.89356e-14	0.666903				Rab26						SLC24A2	Nckx30C
AL158840.1	1.04969e-13	0.697617				g						SLC25A37	mfrn
DGKH	1.08302e-13	0.437128				bou						SLC38A11	CG13743
TNRC6A	1.09682e-13	-0.0603614				side-V						SLC9A7	Nhe3
ZFPM2-AS1	1.10375e-13	0.846835				aop						SLK	Slik
DENND5B	1.12193e-13	0.348572				CG43347						SLTM	Saf-B
FP671120.1	1.27844e-13	-0.504256				corn						SMAD1	Mad
LRRC7	1.34687e-13	0.458706				eag						SNAP23	Snap24
RAPGEF1	1.3774e-13	0.440349				CG3744						SNAP23	Snap25
GNG12-AS1	1.4936e-13	0.996162				mbt						SNAP25	Snap24
HNRNPLL	1.51094e-13	0.637474				cpx						SNAP25	Snap25
GALNT1	1.52426e-13	0.444821				Meltrin						SOCS7	Socs44A
FAM66D	1.55076e-13	-0.4787				FBXO11						SPOCK1	Cow
DOK6	1.55632e-13	0.371122				lncRNA:CR43995						STAG3	SA
PHTF2	1.59602e-13	0.423633				Polr2K						STK38	trc
ST3GAL6	1.59602e-13	0.653583				Rgl						STK39	fray
ERC2	1.61528e-13	0.369257				CG4467						STT3B	Stt3A
PRSS51	1.83545e-13	1.20509				CG33774						STXBP5	Tomosyn
WIPF3	1.95671e-13	0.499539				Akt						STXBP5L	Tomosyn
PCDH7	2.16542e-13	0.444955				nAChRalpha5						SYNE1	Msp300
ADAM22	2.18269e-13	0.341949				alpha-Man-IIb						SYT1	Syt1
ZBTB38	2.36386e-13	0.420344				Socs36E						SYT1	Sytalpha
KCNMB2-AS1	2.47593e-13	0.784865				Mmp2						SYT2	Syt1
MIR29B2CHG	2.50776e-13	0.353606				ed						SYT2	Sytalpha
AC119868.2	2.79657e-13	0.743947				pcs						SYT4	Syt4
MOB3B	2.8547e-13	0.441631				gce						SYT7	Syt7
NEFM	2.91422e-13	0.378251				Usp7						TBC1D1	plx
AC008056.1	2.91422e-13	0.506098				CG14234						TBC1D30	CG42795
GPR88	2.91422e-13	1.03673				Vps11						TBC1D4	plx
RTTN	3.17419e-13	0.616806				LRR						TBL1XR1	ebi
AC058822.1	3.21014e-13	0.513802				Amun						TBL1Y	ebi
STRIP2	3.33437e-13	0.602144				RpS26						TENM1	Ten-a
CACNA1A	3.50791e-13	0.357801				CG45263						TENM2	Ten-a
SGCD	3.58787e-13	0.411971				CG42671						TIAM1	sif
INPP5A	3.58787e-13	0.506504				CG13743						TIAM2	sif
PGM5P2	3.64767e-13	0.640937				Wdr62						TJP1	pyd
GALNT18	4.47231e-13	0.409683				CG34355						TLE1	gro
CCDC39	4.54114e-13	0.603595				hrm						TNIK	msn
CAMK4	4.60965e-13	0.393211				RpS18						TOMM70	Tom70
PLEKHA1	4.94995e-13	0.419192				east						TRPM3	Trpm
AL355472.3	4.96713e-13	0.681051				Ten-a						TSPOAP1	Rbp
KCNK2	5.05576e-13	0.755557				Hsp67Bc						TTBK2	Asator
CA12	5.46184e-13	1.03516				CG32206						TTYH3	tty
AL353586.1	5.52532e-13	1.13385				Task6						TTYH3	CG3638
TTTY14	5.60135e-13	-0.549159				RpL29						TUBA1A	alphaTub84D
FAM189A1	6.03787e-13	0.383656				CG31224						TUBA1B	alphaTub84D
MPRIP	6.24564e-13	0.346346				Abcd1						TUBB	betaTub56D
PTPRR	6.6796e-13	0.405779				Gdap2						TUBB2A	betaTub56D
AL138760.1	6.87987e-13	1.31379				app						TUBB2B	betaTub56D
CHST15	6.91303e-13	0.557545				Epac						TUBB4B	betaTub56D
MAP1A	7.06573e-13	0.42242				hiw						UBB	Ubi-p63E
SFXN5	7.75359e-13	0.470638				wdb						UBB	Ubi-p5E
PPP2R3A	7.91791e-13	0.408473				RhoGEF3						UBC	Ubi-p63E
CLVS2	8.33479e-13	0.40481				ph-p						UBC	Ubi-p5E
CPNE4	8.79253e-13	0.642196				beat-Ib						UBR3	Ubr3
GRM5-AS1	8.92965e-13	0.678053				scyl						UGP2	UGP
AC139713.2	9.18663e-13	0.413042				UQCR-6.4						UNC79	unc79
MT-ATP8	9.18663e-13	0.618991				Kdm4B						UNKL	unk
KLHL2	9.26528e-13	0.410885				Fur1						USP9Y	faf
SLC30A4	9.51903e-13	0.996146				Fili						WDR1	flr
NPAS3	9.84198e-13	0.338533				plx						WLS	wls
PGBD5	9.84198e-13	0.390832				nolo						WSCD2	CG9164
AC020611.2	1.05423e-12	1.19363				Smurf						WWP1	Su(dx)
GPR137C	1.05948e-12	0.395114				lncRNA:CR43651						XPO1	emb
HOMER1	1.1666e-12	0.39053				snRNA:7SK						YWHAQ	14-3-3zeta
PTCHD1-AS	1.25608e-12	0.467236				AP-1gamma						ZNF704	Glut4EF
NDFIP2	1.33328e-12	0.547062				Trf4-1
COL24A1	1.39558e-12	1.44763				S6KL
FMN1	1.41428e-12	0.553653				CG43759
AC093879.1	1.44005e-12	0.485157				hdc
EML6	1.58968e-12	0.373032				kdn
CPLX1	1.59462e-12	0.635668				didum
MAN1A2	1.68363e-12	0.343717				numb
OSBPL1A	1.80288e-12	0.399501				5-HT7
ARPP19	1.8465e-12	0.477679				Gfrl
TBL1XR1	2.06657e-12	0.357868				gish
PDZD2	2.13638e-12	0.423498				Nipped-A
TRMT9B	2.35529e-12	0.486167				X11Lbeta
ZFYVE28	2.42673e-12	0.358377				Pp2C1
GABRG3	2.48691e-12	-0.363375				RhoGAPp190
EPHX4	2.72069e-12	0.898993				Rtf1
AC007098.1	2.77422e-12	0.568313				Dpp10
SLC6A6	2.77422e-12	0.683642				CLIP-190
DPYSL3	2.90869e-12	-0.897779				mgl
MIR2052HG	3.06089e-12	0.585799				cic
FUT9	3.09319e-12	0.349812				Dad
FARS2	3.45324e-12	0.31657				unc-104
TARID	3.74542e-12	1.2535				CG32683
AP000787.1	3.96207e-12	0.485981				tinc
LUZP1	4.05004e-12	0.425521				SK
TENM2	4.20241e-12	-0.172095				RpS16
SV2B	4.45454e-12	0.511593				enc
SESN1	4.51775e-12	0.37334				cnc
SYNDIG1L	5.35993e-12	0.983473				Mbs
ANKRD19P	5.49987e-12	0.384804				Tomosyn
MAPK10	5.62658e-12	0.313188				Pka-C1
KCNT2	6.06067e-12	-0.525635				Fur2
AC025580.2	6.82086e-12	1.18818				CG32264
CDYL2	6.84765e-12	0.524807				G9a
NAALAD2	6.87557e-12	0.437435				Tet
GABRA1	7.28544e-12	0.384964				PAN3
OGT	7.65554e-12	0.376849				bin3
STRADB	7.65554e-12	0.520197				28SrRNA-Psi:CR45859
XIST	7.80606e-12	0.54861				CG34353
ITGA9	1.01051e-11	0.544408				NetB
YARS	1.07582e-11	0.534492				CR40190
PPARGC1A	1.12893e-11	0.540356				DopEcR
SAMD12	1.15494e-11	0.337788				CR41320
ST6GALNAC3	1.30041e-11	0.390629				CG18809
HIPK4	1.3005e-11	0.732879				dpr6
CD226	1.31788e-11	0.811087				syd
PGRMC1	1.53112e-11	-0.669479				KrT95D
CTNNA1	1.58953e-11	0.542185				trv
STRN	1.65483e-11	0.520865				schlank
DNER	1.68619e-11	-0.479914				CG6770
CACNA1C	1.69289e-11	0.384982				Nuak
CALB2	1.73175e-11	-1.55978				Trl
NRG3	1.75475e-11	0.448467				Ac3
MGAT5B	1.77731e-11	0.518048				CG34357
AL390783.1	1.7786e-11	0.525817				DOR
C9orf84	1.84572e-11	0.518077				CG45002
RPS6KA5	1.94795e-11	0.396066				Piezo
AC244517.11	1.97959e-11	0.737664				Rab3
PRKG1	2.00899e-11	-0.439696				ct
AFF1	2.06056e-11	0.69616				Polr2A
RAB11A	2.06709e-11	0.356984				smash
FBXO32	2.06709e-11	0.755223				GATAd
RAPGEF2	2.06935e-11	0.34241				cdi
ENC1	2.10328e-11	0.517331				CG14073
RBFOX3	2.1593e-11	0.344473				OtopLc
STARD9	2.33466e-11	0.804919				Graf
SACS	2.46164e-11	0.351325				tud
PRKCH	2.48576e-11	0.743576				Pp2B-14D
IL17RA	2.71395e-11	1.23936				Calx
RASGRF2	2.75996e-11	0.400852				CG7065
RCAN2	2.98143e-11	0.401102				lncRNA:CR45347
PLEKHA7	3.18681e-11	0.857633				CG9932
PHACTR3	3.18863e-11	0.352453				Paf-AHalpha
DMD	3.18863e-11	0.381925				Psi
NEBL	3.44529e-11	-0.161704				hep
ZNF189	3.62345e-11	0.765416				MEP-1
PLD3	3.73773e-11	-0.428369				dlg1
TCHP	3.78828e-11	0.494412				fray
WASF1	3.86571e-11	0.348906				Dgk
CTDSPL	3.87754e-11	0.351344				eIF4G2
RNF144A	3.89016e-11	0.351173				CG31211
THRB	3.91246e-11	0.340496				Syt1
SNCA	3.91246e-11	0.353177				alpha-Man-Ia
ADARB1	4.05628e-11	0.419742				faf
KALRN	4.21783e-11	0.34753				wapl
OXNAD1	4.2267e-11	0.565044				dpr4
FRA10AC1	4.36281e-11	0.49374				su(sable)
BSN	4.87417e-11	0.360142				Ca-Ma2d
SYCP2	4.90372e-11	0.844519				18w
NCAM1	4.92868e-11	-0.144699				lncRNA:CR44024
SHPRH	5.03823e-11	0.332472				MESK2
FAM49B	5.30793e-11	0.312663				jvl
AC006059.1	5.36565e-11	0.458658				CG6923
CAMKK2	5.39598e-11	0.528446				lncRNA:CR45388
NAP1L3	5.54852e-11	-0.704645				vas
LINC01362	6.52299e-11	0.657289				klg
DIRAS3	6.67531e-11	-1.3487				RpL9
MT-ND6	6.83901e-11	0.387684				sima
ONECUT2	7.22798e-11	0.995902				gpp
AP001992.1	7.71306e-11	0.637995				FoxP
ZDHHC11	8.21421e-11	1.01078				Pkc53E
GAPDH	8.52366e-11	-0.76456				Trpm
FILIP1L	8.71304e-11	0.397304				Liprin-gamma
AP003049.2	9.05629e-11	0.597009				Fim
RPAP2	9.32621e-11	0.342442				14-3-3epsilon
PCNT	9.48139e-11	0.395661				eIF5B
AC008591.1	9.70407e-11	0.407827				RhoGAP71E
MPP7	9.70407e-11	0.53862				Frl
CIRBP	9.73247e-11	-0.559836				Nckx30C
RHOBTB3	1.05623e-10	0.643268				CG1737
TUBB2B	1.27745e-10	-1.56762				RpS23
ELMO1	1.35873e-10	0.339002				Cad87A
GUCY1A1	1.3971e-10	0.426191				Ptp10D
AP000311.1	1.46191e-10	0.369532				Dscam1
FNDC3A	1.52137e-10	-0.269148				CG3638
GABRB1	1.86999e-10	-0.118763				Tom7
AC073167.1	1.93937e-10	0.517219				gro
COCH	1.97524e-10	0.553884				lncRNA:CR31451
WLS	2.0859e-10	0.650656				cwo
AC093503.2	2.20552e-10	0.631087				kmr
ATP2A2	2.20983e-10	0.298583				Ank2
TFDP2	2.2387e-10	0.323093				CG14995
Z99774.1	2.43476e-10	0.862239				BtbVII
JAKMIP2-AS1	2.48274e-10	0.578004				msn
IL3RA	2.54167e-10	0.566089				EloA
LSAMP	2.5993e-10	-0.173294				sol
PPFIA4	2.63437e-10	0.441163				Gbeta13F
CDHR3	2.65534e-10	0.419349				tei
ZFPM2	2.96553e-10	0.372806				Rok
IGSF9B	3.35804e-10	0.632325				lncRNA:CR45911
PCDH11Y	3.42629e-10	-0.808722				yrt
PHACTR1	3.4433e-10	0.438419				eIF2beta
LRRC39	3.60383e-10	0.915972				chb
DST	3.60867e-10	0.235704				sbb
ANKRD55	3.68146e-10	-0.725704				Su(Tpl)
NKAIN3	3.69728e-10	0.380435				elB
KCNIP2	3.8205e-10	0.481007				CG34384
CDH22	4.2923e-10	0.509994				amn
FAM19A1	4.3786e-10	0.645809				CG1090
AC012404.1	4.4103e-10	0.594507				Rala
NCOA7	4.53803e-10	0.302306				S
NCEH1	4.66546e-10	0.392814				Golgin245
SLC7A8	4.86014e-10	0.6527				asRNA:CR45969
DLG1	4.90202e-10	0.30125				smg
NCOA2	5.32194e-10	0.308361				GlcT
LINC02231	5.49273e-10	0.810086				Ttd14
RHBDL2	5.54488e-10	0.555874				CG8929
SGMS1	5.69625e-10	0.314175				CG2698
CMIP	5.80924e-10	-0.295368				Hyccin
SCARB1	6.05382e-10	0.528322				Kap-alpha1
CNTN5	6.43446e-10	0.464154				CG6654
USP9Y	6.49229e-10	-0.5216				Mvb12
HSP90AB1	7.12518e-10	-0.4959				wdn
OTUD7A	7.89271e-10	0.311784				CG4596
PLEKHA8	7.89271e-10	0.639036				E(var)3-9
IVNS1ABP	7.89271e-10	0.767997				Sec61alpha
INPP4B	8.20894e-10	0.329685				Rab39
MTERF1	8.74859e-10	0.414879				brwl
AC099788.1	9.3014e-10	0.601194				CG5174
AC106869.1	9.48421e-10	0.463575				CG2938
NNAT	1.01817e-09	-0.588819				CG12822
LRFN2	1.01817e-09	0.434583				Saf-B
AC097468.2	1.01817e-09	0.61818				Tom40
EML1	1.02029e-09	0.432027				CG4849
DENND1B	1.04245e-09	0.357721				GlcAT-I
CARNMT1	1.04291e-09	0.524217				SCCRO3
CXorf57	1.07693e-09	-1.2707				Clamp
WDPCP	1.12475e-09	0.291717				cGlr2
MT-RNR2	1.14008e-09	0.201534				CG31678
LRP12	1.21542e-09	0.383171				Pect
TRPC6	1.21834e-09	0.966894				CG8765
KIZ-AS1	1.22968e-09	0.769588				Hph
AC010976.1	1.23462e-09	0.850282				CG11975
PMEPA1	1.276e-09	0.589042				Rep
CST3	1.35488e-09	-1.43207				Sply
WDR17	1.41121e-09	0.284351				Ate1
GREM2	1.49665e-09	0.795389				Tudor-SN
ICA1	1.53158e-09	0.32785				eEF1gamma
DNAH11	1.5352e-09	1.52806				CG12091
DPY19L2P3	1.6165e-09	0.448404				CG4239
PRKD1	1.61886e-09	0.366102				CG8243
NLRP1	1.62683e-09	-0.793469				ClC-c
FBXL16	1.70338e-09	0.491644				Ubc6
ALOX12P2	1.70647e-09	0.354448				Acn
RPS6KA3	1.76109e-09	0.340582				mfrn
SLC44A1	1.82534e-09	0.32332				Men
MEG3	1.83094e-09	0.320364				barc
CDK19	1.979e-09	0.348596				Socs44A
FP700111.1	1.98789e-09	0.321193				Mgat1
AC015687.1	2.07292e-09	0.606849				CG17019
DYSF	2.09792e-09	0.742137				Mkk4
KIZ	2.10094e-09	0.39849				CG8001
CHSY3	2.13716e-09	0.336638				lqfR
TTN	2.16935e-09	0.45317				p
SORBS2	2.2041e-09	0.355298				CG17508
CD63	2.31408e-09	-1.35585				CG13398
TCAF1	2.34206e-09	0.307614				Hmu
ERICH1	2.43638e-09	0.5279				LeuRS-m
GABPB1-AS1	2.4655e-09	0.39451				dmpd
LPL	2.54026e-09	0.760738				CG11658
JPX	2.55833e-09	0.298505				CG33116
LINC00894	2.56139e-09	0.400826				drk
EML4	2.76169e-09	0.377321				CG10321
ANKS1B	2.81712e-09	0.340972				CG1909
FBXO34	2.84144e-09	0.34204				ecd
GAB1	2.84144e-09	0.760793				CG31523
TPBG	2.84144e-09	1.39505				DAAM
AC016831.6	2.88356e-09	0.312554				nbs
BACH2	3.03773e-09	-0.498656				Mad1
KCNB1	3.03811e-09	0.29899				CG1492
FBXW7	3.03811e-09	0.312634				mr
TLN2	3.26271e-09	0.304567				lace
HERC1	3.54583e-09	0.284646				Jarid2
KIAA1549L	3.61283e-09	0.305984				CG32112
AC109441.1	3.65188e-09	1.21866				alpha-Catr
MRTFB	3.88128e-09	0.296392				Non2
ETV6	4.02265e-09	0.745225				Pkc98E
C12orf40	4.13152e-09	0.387746				Ppa
CAV3	4.22111e-09	0.697506				axed
PTPRG	4.25257e-09	0.344967				CG6276
STXBP6	4.25257e-09	0.567265				CG16979
PGP	4.48235e-09	0.405068				CG7332
KCNH1	4.64257e-09	0.409254				Ald1
AP002336.2	4.71215e-09	0.499106				flr
ARMH4	4.7733e-09	0.346629				Galphas
CEMIP2	4.97437e-09	0.585838				CG15651
JMJD1C	5.05351e-09	0.301428				lili
BNIP3L	5.07017e-09	0.322743				alpha-Est9
FIGN	5.09117e-09	0.560422				CG6650
CDH6	5.09682e-09	0.706673				l(3)04053
EYA4	5.39713e-09	0.96494				kuk
POLQ	5.40041e-09	1.09698				Arf51F
WWP1	5.73116e-09	0.330551				CG8027
MIR646HG	5.91906e-09	0.600446				CG11414
MBNL1	6.50696e-09	0.29681				CG9265
AC139720.1	6.50696e-09	0.413718				CG13928
MAGI1	6.81041e-09	0.296725				Ran
KCNMA1-AS1	6.85598e-09	0.578393				PICK1
ACAP2	6.94667e-09	0.304563				gus
FNBP1L	7.25865e-09	0.333018				Fcp1
RFX4	7.44619e-09	0.413786				CG6707
SLC4A8	7.48317e-09	0.36515				Scm
NGEF	7.80404e-09	0.439775				CG7600
FAM182B	8.22205e-09	-0.481036				Ugalt
AC063952.1	8.82312e-09	2.5907				ZnT49B
ASCC3	9.76671e-09	0.290342				CG16974
LRRC49	1.00581e-08	0.312068				VhaPPA1-1
LMTK2	1.02328e-08	0.319392				Rnp4F
PIK3R1	1.03208e-08	0.33006				asRNA:CR45835
COX10-AS1	1.04661e-08	0.392351				fdl
OSBPL6	1.05461e-08	0.294581				ATPsynbeta
GABRA4	1.06109e-08	0.329003				wls
PLCL1	1.10691e-08	0.304138				alpha4GT1
PLK2	1.13605e-08	0.550501				CG7565
ZNF451	1.13775e-08	0.335281				mbf1
AC104781.2	1.14205e-08	0.77744				AsnRS
AC013652.1	1.18614e-08	0.36323				CG9279
AF117829.1	1.18709e-08	0.396302				MED21
TBRG1	1.20184e-08	0.47905				Tsp42Ek
LRBA	1.23108e-08	0.295049				Ddx1
ST8SIA1	1.24227e-08	0.376327				Stt3A
NR6A1	1.27594e-08	0.314592				ebi
DACH1	1.30943e-08	0.520417				CG9775
PPP1R1B	1.34178e-08	0.74787				CG3618
CA11	1.34935e-08	0.46395				Desat1
MRPS30-DT	1.35389e-08	0.452276				CG34404
PDE7A	1.36556e-08	0.394055				Hsl
AP002075.1	1.36556e-08	0.719879				Wdr37
AC023906.3	1.39469e-08	0.782243				jagn
ST6GAL2	1.40113e-08	0.451831				CG31145
C11orf87	1.41268e-08	0.562135				HnRNP-K
KANSL1L	1.42662e-08	0.315568				LpR2
TMLHE-AS1	1.46158e-08	0.607812				AdSS
RAD18	1.61806e-08	0.391426				CG5916
AL139184.1	1.69827e-08	0.436389				Parg
AC130650.1	1.93003e-08	0.661124				Nhe1
AP001011.1	1.93919e-08	0.4663				CG11436
FRY	1.9581e-08	0.285179				UGP
PPP2R2C	1.99206e-08	0.27749				Ccm3
AC244669.1	2.00641e-08	0.678682				Wbp2
AL160254.1	2.02869e-08	0.653304				Vps4
PAQR3	2.06386e-08	0.438036				Cpr
ARHGAP44	2.10363e-08	0.286341				eIF4B
CHL1	2.14547e-08	-0.240965				Serinc
NDN	2.1491e-08	-0.892699				Pa1
PTPDC1	2.24295e-08	0.420965				CG3662
G2E3-AS1	2.28703e-08	0.647104				ATPCL
SOS1	2.3197e-08	0.287762				CG6184
L3MBTL4	2.40508e-08	-0.41141				CG2082
CAPS2	2.50911e-08	0.366639				Tpc1
PKN2-AS1	2.51815e-08	0.589907				scaf6
TLK1	2.52926e-08	0.300808				CG18259
PHACTR2	2.67916e-08	0.559154				CG11099
GFOD1	2.81353e-08	0.297674				CG6418
SORT1	2.81353e-08	0.334881				cert
AC008735.2	2.92296e-08	0.849695				CG31637
AC007388.1	2.94414e-08	0.306458				SA
LMCD1-AS1	2.94414e-08	0.381359				eEF2
HDAC2-AS2	2.96678e-08	0.412753				CG11811
ECPAS	3.23517e-08	0.284782				hpRNA:CR18854
TSGA10	3.25398e-08	0.352705				CG5316
PELI2	3.48038e-08	0.574552				CG3651
KHDRBS3	3.51791e-08	0.414638				CG17493
2001-03-01	3.57848e-08	-0.30929				atl
MYO1D	3.57848e-08	0.332635				TER94
STYK1	3.60561e-08	0.869626				MAN1
CDS1	3.77047e-08	0.51292				Mad
TERF2IP	3.98534e-08	-0.450938				Ptpmeg
ACTN1	4.09314e-08	0.303932				CG14408
KLHL28	4.10796e-08	0.370552				Tace
RHOBTB2	4.36798e-08	0.603199				CG33156
PARD3	4.40957e-08	-0.256822				Dhx15
NLK	4.59312e-08	0.301555				Smg5
KCNMB4	4.61138e-08	0.426159				D19A
AC069228.1	4.68931e-08	0.364189				Snx21
TMEM161B-AS1	4.6956e-08	0.282398				Pka-R1
BAIAP3	5.24487e-08	-0.488048				CG31064
ANKRD28	5.44103e-08	0.27978				rho-5
FAM85B	5.57176e-08	-0.304382				Cul1
MEIS1	5.57176e-08	0.746844				Snx1
SRRM3	5.8471e-08	0.26929				CG5262
USP11	5.98837e-08	-0.533847				zda
KCNAB2	6.29768e-08	0.358862				CG16953
AC019068.1	6.53008e-08	1.60002				gzl
TMEM178A	6.72979e-08	0.411941				CG13933
SEC14L5	6.84763e-08	0.547133				CG11807
HMGCR	7.03763e-08	0.384517				CG12024
SMAD1	7.23591e-08	0.395393				ClC-b
ANKS1A	7.87519e-08	0.315753				sotv
RAPGEF4	8.18499e-08	0.288824				sra
AC025034.1	8.18499e-08	0.593726				qkr58E-2
RAPH1	8.34432e-08	0.287009				CG12213
NRXN3	8.99376e-08	0.472827				loaf
TIMP2	9.09225e-08	-0.4986				Srp72
AL356056.2	9.10687e-08	0.474217				NaPi-III
TJP1	9.16845e-08	0.265675				CG17486
JARID2	9.35926e-08	0.29193				me31B
ITGAV	9.79836e-08	0.448255				Usp5
AC104123.1	1.01523e-07	0.65975				muc
CRLF3	1.01969e-07	0.271593				Polr2I
PLA2R1	1.02361e-07	0.555083				CG9368
ASIC2	1.09701e-07	0.320296				nAChRbeta2
ARL15	1.10504e-07	0.296516				conu
KIAA0232	1.11566e-07	0.280138				CG14591
SNAP23	1.14481e-07	0.549738				CG17646
PPP2R2A	1.14782e-07	0.323581				dpr20
TLE1	1.14985e-07	0.576522				CalpA
ANOS2P	1.15305e-07	-0.636134				dpr12
PHTF1	1.20498e-07	0.342445				amon
AC005999.2	1.25904e-07	-0.74352				nst
SPDYE3	1.35379e-07	0.383082				ClpX
UNC80	1.35786e-07	0.270427				emc
KCNIP1	1.38623e-07	-0.503582				Ythdc1
AAK1	1.4161e-07	0.244563				CG44243
GNB5	1.48836e-07	0.291677				Atg9
RFTN1	1.5216e-07	0.556419				Klp64D
MED13L	1.5445e-07	0.266914				MFS18
AC010615.2	1.58562e-07	0.77392				eRF3
PPP2R5C	1.58781e-07	0.270918				CG4972
BX890604.2	1.62886e-07	-0.84172				CG18870
ADCY8	1.72809e-07	0.45909				stas
BCL11A	1.77438e-07	0.366944				Tmem63
RORA	1.79683e-07	0.288267				TM9SF4
FSTL4	1.81376e-07	0.321934				CG3061
SORCS1	1.8909e-07	-0.392805				GLS
AP001825.1	1.91008e-07	0.325409				fbl
AIG1	1.92754e-07	-0.300598				CG5027
CACNG3	1.9444e-07	0.304972				CG12576
C17orf51	1.96706e-07	0.350481				Pgi
DPY19L2P1	1.96737e-07	0.295007				ChAT
MERTK	1.99312e-07	1.09767				Rpn2
MT-ND2	2.0241e-07	0.256608				asRNA:CR45822
LINC00710	2.0241e-07	0.799889				Gbeta5
AC005906.2	2.02614e-07	0.447958				Nmda1
MT-ND4L	2.04019e-07	0.3183				par-6
FAR2	2.11945e-07	0.30429				CG8726
TMTC2	2.19885e-07	0.277834				dor
YPEL1	2.45578e-07	0.414959				CG9281
EPHA7	2.61323e-07	0.31935				GlcAT-S
2011-09-01	2.61784e-07	0.278393				ohgt
RFPL1S	2.63757e-07	0.357587				p130CAS
CELF1	2.65998e-07	0.260863				CG6659
CNTNAP5	2.66184e-07	0.31101				f-cup
LARGE-AS1	2.73879e-07	0.948358				Rat1
FAXC	2.84801e-07	0.337548				Cow
AL139260.1	2.9171e-07	0.286553				Abi
DLGAP2	2.94651e-07	0.300733				CG11857
IGSF11	3.07822e-07	0.322494				Tom70
NAPEPLD	3.14593e-07	0.484038				unc79
HS3ST5	3.16583e-07	0.401109				CG7791
AL591242.1	3.17431e-07	0.82871				Miro
RPL10	3.2202e-07	-0.826951				Leash
SLC26A11	3.2202e-07	-0.710405				trc
KIF13A	3.22712e-07	0.339846				tadr
MAK	3.42155e-07	0.351093				Fem-1
FAR1	3.53243e-07	0.275781				CG10376
FGD4	3.57086e-07	0.323086				CenB1A
SRP14	3.60059e-07	-0.790662				Vps53
AC011092.2	3.66798e-07	0.472715				CG4364
PPHLN1	3.72662e-07	0.277219				CG14883
NEDD4L	3.97646e-07	0.257387				ref(2)P
PDE1B	4.19062e-07	0.454853				Kap-alpha3
LYST	4.27402e-07	0.269806				Ras64B
MTURN	4.3054e-07	0.398805				Cortactin
SOS2	4.33636e-07	0.308616				l(3)73Ah
OSBP2	4.36262e-07	0.269349				ScsbetaA
ACTR2	4.55856e-07	0.270668				Cerk
JPH4	5.11016e-07	0.251367				Ras85D
SPEF2	5.13656e-07	-0.505205				Drp1
COP1	5.17003e-07	0.257585				CG12236
REPS2	5.18899e-07	0.271303				SF1
GNAO1	5.34889e-07	0.239068				Npc1a
OPHN1	5.34889e-07	0.269701				FucT6
ADAMTS19	5.34889e-07	0.301798				Mlc-c
SLC9A1	5.34889e-07	0.627061				dpr7
GRIN2B	5.38777e-07	0.323025				Fatp1
MAPK4	5.69e-07	0.407888				Uev1A
FCHSD2	5.7217e-07	-0.318752				dock
NBEA	5.80216e-07	0.297889				CG3702
CHRM3-AS2	6.01082e-07	0.846981				alphaTub84D
AC103974.1	6.01649e-07	0.617829				Abcd3
EHBP1	6.04278e-07	0.257826				CG10089
DGKB	6.21748e-07	0.261626				Sytalpha
ADGRL3	6.21758e-07	0.289328				CG17660
ST7-AS2	6.27658e-07	0.6014				Nf-YC
AC093752.1	6.31103e-07	0.246661				Sac1
GYG2P1	6.39886e-07	-0.645774				CG5938
SRRM4	6.45261e-07	0.309437				CG6903
SNN	6.51356e-07	0.812763				CG7430
GPSM2	6.76606e-07	0.405169				CG13605
GRID1-AS1	6.80944e-07	0.774142				dpr18
KIF5C	6.84044e-07	0.269594				CG9164
VAT1L	6.94854e-07	-0.416457				tgo
LIPI	6.99877e-07	0.957643				Ir76a
SLC16A10	7.33615e-07	0.362312				Atg18a
CLSTN3	7.44416e-07	0.240335				CG9426
ZHX2	7.50121e-07	-0.538757				Abp1
LHFPL6	7.66738e-07	0.582744				Tbce
SPECC1	7.77211e-07	0.301517				Rab30
HS3ST2	7.91694e-07	1.19487				Pal1
DPP6	8.00991e-07	0.258352				CG5805
AC004039.1	8.00991e-07	0.402802				Ns2
SLC12A2	8.19518e-07	0.347482				CtsF
AC008676.3	8.20153e-07	0.609695				spas
PTPRN2	8.90882e-07	0.224206				CG6867
CNNM1	9.72565e-07	0.306005				Irp-1B
TACC1	9.73383e-07	0.302727				Mlf
ZNF451-AS1	9.80001e-07	0.577449				GCS2alpha
AL136298.1	9.87314e-07	0.63472				CG9646
VTI1A	1.01457e-06	0.271183				GPHR
PTPRB	1.0171e-06	0.375088				hook
FAM168B	1.0367e-06	0.379408				CG10565
ARMC8	1.087e-06	0.289279				Psa
AC079385.1	1.09334e-06	0.357927				CG4238
E2F3	1.11644e-06	0.35181				Ent1
MIR4435-2HG	1.26701e-06	0.34976				CG2258
AC012409.2	1.2837e-06	1.05903				miple1
GALNTL6	1.32144e-06	-0.345415				Rbf
CNGB1	1.3402e-06	-0.706958				ABCB7
AL513164.1	1.3402e-06	0.957648				Tsp97E
PSME4	1.34752e-06	0.32456				NTPase
SYNGAP1-AS1	1.35711e-06	0.476178				GAA1
CHST9	1.35711e-06	0.477557				Klc
STK39	1.3926e-06	0.265163				VhaSFD
AC074032.1	1.40219e-06	0.306417				CycY
NT5DC1	1.43046e-06	0.34173				blw
NOS1AP	1.43276e-06	0.392342				Arl8
RNF115	1.44969e-06	0.264806				Eb1
CTTNBP2	1.48355e-06	0.259652				Ttc7
NR3C1	1.4996e-06	0.262162				Sur-8
TRAK2	1.4996e-06	0.304789				betaTub56D
NBPF5P	1.4996e-06	1.95606				Mitofilin
NPM1P30	1.50012e-06	0.932852				CG14186
DDX24	1.5148e-06	-0.468494				CG5746
AL390957.1	1.54484e-06	0.966891				CG3703
TOM1L1	1.58343e-06	0.388136				CG5466
EPB41L3	1.5865e-06	0.227797				Rab1
AC092683.2	1.59418e-06	0.432556				CG33267
TPPP	1.60455e-06	0.337625				Pino
DENND4A	1.63413e-06	0.239844				Tpr2
PHC2	1.71243e-06	0.277852				HPS1
NECAB1	1.71243e-06	0.280827				eIF3a
IRAK1BP1	1.72703e-06	0.26723				Cog7
TMX4	1.81343e-06	-0.496654				Sap-r
AC107068.2	1.89576e-06	0.554364				Gpo1
ASB18	1.90892e-06	1.67945				Ent3
XKR6	1.96052e-06	0.283088				betaCOP
SUGP2	1.97066e-06	0.256361				CG3548
HACD3	1.9732e-06	-0.438684				MICU3
AC009554.1	2.03134e-06	0.439411				kra
ITM2C	2.03739e-06	-0.557586				Mo25
PRKAR1B	2.04316e-06	-0.317577				CG3860
HECTD2	2.05717e-06	0.279861				loqs
PASK	2.08974e-06	0.867703				Atat
C9orf41-AS1	2.09439e-06	0.757883				Ndfip
MIA2	2.11554e-06	0.296359				temp
ATP1B1	2.1183e-06	-0.313151				Act5C
GNPTAB	2.1183e-06	0.306657				Ric
CCDC148	2.17413e-06	0.303575				aralar1
PRICKLE1	2.18006e-06	0.3139				CG1640
PBX1	2.19759e-06	0.287503				asRNA:CR43944
RTN1	2.22257e-06	-0.152919				Deaf1
GALNT14	2.22257e-06	0.64013				CG13344
TUNAR	2.28221e-06	0.914691				P5CDh1
GLB1L3	2.29383e-06	0.555064				CG7222
BAZ2B	2.35222e-06	0.257855				SdhA
MTMR12	2.41187e-06	0.361666				Atg8a
NRSN1	2.41415e-06	0.266335				CG7785
UNC13A	2.43524e-06	0.2603				Droj2
RAB11FIP4	2.50846e-06	0.282894				CG8298
MPP6	2.50846e-06	0.292584				TBC1D16
DYNLL1	2.53203e-06	-0.506691				rogdi
ITGB1BP1	2.53203e-06	0.317736				Pp2A-29B
DOP1B	2.56277e-06	0.336145				ND-75
FOXG1	2.61031e-06	0.439097				arm
IQGAP1	2.64515e-06	0.364406				Sam-S
ACHE	2.76254e-06	-1.11559				glo
RNF145	2.76898e-06	0.281131				CG3078
BZW2	2.84378e-06	0.508792				Gdh
ZNF704	2.85819e-06	0.254887				Task7
GREB1L	2.98683e-06	-0.328977				CG12194
AC024901.1	3.10766e-06	0.377308				Vha26
RAB11FIP2	3.1109e-06	0.322401				CG6428
LINC01551	3.1109e-06	0.356872				CG8613
TMED11P	3.11747e-06	0.648827				CG1309
ATP1A1	3.13743e-06	0.230367				vap
RPP38	3.14729e-06	0.421944				CG46280
KIAA0930	3.16297e-06	0.266278				su(w[a])
ARHGEF7	3.24258e-06	0.24986				TM9SF2
ACSM6	3.26355e-06	0.728465				lost
PAPSS1	3.31138e-06	0.253662				Ggamma1
CELF5	3.40033e-06	-0.17715				CG6191
WSCD2	3.47116e-06	0.329462				CG6236
CCSER2	3.50316e-06	0.239875				Tmtc3
PTCHD4	3.56753e-06	0.342349				MAPk-Ak2
AC092969.1	3.7628e-06	0.318115				CG18135
LRRTM3	3.94859e-06	0.267963				CG2017
UBA6-AS1	3.95537e-06	0.263188				EndoB
ABCB1	3.98681e-06	0.393566				eIF4A
RUNDC3A-AS1	4.04162e-06	0.65938				Trxr-1
ADGRB3	4.53288e-06	0.319776				GCS1
SHISA9	4.57672e-06	-0.157795				Ref1
B3GNT5	4.57672e-06	0.491587				Med
PCBP3	4.59944e-06	0.602619				sax
IPO9-AS1	4.60973e-06	0.364099				Hrb98DE
EEPD1	4.62198e-06	0.38388				Lamp1
SYT2	4.65874e-06	0.511539				Klp68D
AC010275.1	4.65874e-06	0.654126				CG4853
FAM13B	4.66218e-06	0.253303				hfp
ZNF91	4.68061e-06	0.233243				RhoBTB
AL365295.1	4.70567e-06	0.446515				TM9SF3
AC139795.1	4.77751e-06	0.387456				VhaAC39-1
ZEB1	4.78156e-06	0.249121				CG31808
SMPD3	4.875e-06	0.32164				VhaAC45
TCAIM	4.97469e-06	0.304557				cin
PTN	4.99173e-06	0.60116				CG2701
ADCY9	5.05656e-06	0.24633				HmgD
GDA	5.12914e-06	-0.413008				Kcmf1
GPR155	5.1671e-06	0.246251				Prp3
PTPN13	5.21999e-06	0.319781				mmy
MAP2K5	5.26573e-06	0.232996				dpr19
HTR4	5.34845e-06	0.325162				CG10137
GAS2	5.78079e-06	0.341069				CG7083
MAGED1	5.88451e-06	-0.32935				slgA
ZCCHC12	5.93341e-06	-1.14448				ytr
TAOK3	5.95324e-06	0.245499				PIG-L
SORCS2	5.97355e-06	0.271072				CG7739
MT-ND5	6.14283e-06	0.228703				Syx6
SNX32	6.16626e-06	0.264824				CG1486
EGFR	6.16626e-06	0.455522				CG7492
VAV3	6.24775e-06	0.551384				AP-1-2beta
PKP4-AS1	6.32701e-06	0.842566				CG2991
KCNN2	6.34551e-06	0.414842				CG32815
TTLL5	6.38274e-06	0.281264				ras
ZRANB3	6.7976e-06	0.276685				CG13685
LMO4	6.88545e-06	0.390466				Cdk5alpha
TRHDE	6.88545e-06	0.444644				aqz
IL1RAPL2	6.95913e-06	0.627398				Herc4
CACNA1D	6.98712e-06	0.277561				Aplip1
LRCH1	7.06696e-06	0.32529				qkr58E-3
AL596451.1	7.11049e-06	0.728526				Synj
PIGC	7.21913e-06	0.508183				Faf2
LEMD3	7.2206e-06	0.334876				Gasz
OTUD3	7.24093e-06	0.489348				Hsc70-4
BLCAP	7.36059e-06	-0.33926				Lerp
NRCAM	7.51916e-06	0.215094				cass
AL049830.3	7.55997e-06	0.759986				Gabat
DNAH6	7.68394e-06	0.284303				CycG
TRAPPC9	7.77362e-06	0.253326				ND-AGGG
ITSN2	7.86781e-06	0.25361				sand
ATP11A	7.93321e-06	0.31406				CG14853
ENO4	8.00243e-06	0.469412				l(3)02640
SLC25A40	8.12563e-06	0.401621				CG31638
ADGRL2	8.35668e-06	0.254681				CG5273
CEP192	8.40191e-06	0.278266				Hsp60A
DRD2	8.46411e-06	0.839418				CG7414
ARHGEF11	8.65364e-06	0.272083				Rop
SPHKAP	8.65364e-06	0.437289				Nhe3
AC096576.3	8.65431e-06	0.647236				CG43066
EIF2AK3	8.8684e-06	0.472481				Argk1
CHCHD3	8.97144e-06	0.244176				Mpcp2
SUSD4	9.12115e-06	-0.219183				alpha-Man-Ib
AC092574.2	9.19415e-06	0.439542				TBPH
TTN-AS1	9.21492e-06	0.26559				comt
GLS	9.36251e-06	0.207755				CG14767
ESRRG	9.39132e-06	0.234811				Drat
AGBL1	9.40807e-06	-0.77477				Arf79F
AKT3	9.61008e-06	0.264223				Pur-alpha
CRNDE	9.77938e-06	1.0307				PyK
AC079760.2	1.01878e-05	0.661947				CD98hc
ABLIM1	1.0217e-05	-0.242316				Afg3l2
P2RY14	1.02992e-05	0.381138				CG4230
MIR34AHG	1.05318e-05	1.34563				Csp
ENOSF1	1.12167e-05	-0.795931				Mtmr6
AC010615.4	1.13223e-05	0.305437				CG8195
NPNT	1.16523e-05	-0.801902				CG33199
IFT88	1.16675e-05	-0.43254				exd
AHI1	1.16701e-05	0.269701				path
DOCK10	1.16766e-05	-0.331977				Unc-76
XKR4	1.19677e-05	0.283922				Lis-1
HTT	1.22626e-05	0.238552				CG32544
FLNB	1.26552e-05	0.290814				Nca
IQSEC1	1.27966e-05	0.231815				Wee1
PIK3C2A	1.2984e-05	0.316181				Ctr9
KCNT1	1.32411e-05	0.390501				Gs1
AC017101.1	1.35008e-05	0.584183				Non1
ANO5	1.36993e-05	0.258268				CR41597
LANCL1-AS1	1.36993e-05	0.369077				stmA
AC012358.3	1.3778e-05	0.367442				CG18549
STON2	1.38971e-05	-0.712816				Cds
GNAL	1.39697e-05	0.257125				Atg101
ANKRD20A5P	1.39697e-05	0.623899				eEF1alpha2
ATP6V0B	1.45199e-05	-0.706155				Rm62
ORC4	1.47588e-05	0.266705				fzr
DPP10	1.54083e-05	0.301709				Men-b
IL1RAPL1	1.56885e-05	0.355632				CG3257
REV3L	1.59996e-05	-0.171038				Vha55
SLC22A25	1.62712e-05	1.16487				Pcyt1
HACD2	1.62722e-05	0.337307				mAcon1
TMEM260	1.63302e-05	0.28186				Ubi-p63E
ZNF420	1.63421e-05	0.275045				Syt4
GOLT1B	1.71651e-05	0.40522				Vha68-1
AC004448.2	1.72893e-05	1.02871				Gycalpha99B
S100A6	1.85756e-05	-1.4566				CG10077
MSH2	1.88773e-05	0.238266
UBC	1.89179e-05	-0.639836
SIPA1L2	1.94491e-05	0.430108
CCSAP	1.94587e-05	0.346216
DTNA	1.94774e-05	0.229714
AEBP2	1.95633e-05	0.226275
WDR41	2.06236e-05	0.312362
HERC2	2.07568e-05	0.238975
CACNG7	2.08296e-05	0.457425
ZNF235	2.11896e-05	0.337396
LZTS3	2.19732e-05	0.392739
CHGB	2.23155e-05	-0.843924
HERC3	2.246e-05	0.338032
DENND6A-AS1	2.34626e-05	0.444135
SNED1	2.43015e-05	0.352447
NCK2	2.44375e-05	0.431603
OPRD1	2.47289e-05	0.870102
TMOD1	2.51899e-05	0.376646
DGKE	2.54791e-05	0.311763
NDRG4	2.55519e-05	0.162449
AC092691.1	2.57099e-05	-0.18346
STMN1	2.60671e-05	-0.612329
ABHD15-AS1	2.60979e-05	0.38458
PCDH17	2.67502e-05	-0.424823
CDH7	2.79474e-05	0.453596
GNG7	2.82182e-05	0.320032
TTBK2	2.82358e-05	0.232648
ATXN10	2.89555e-05	-0.255354
RASGEF1B	2.89917e-05	0.460727
KHDRBS2	2.93649e-05	0.237662
EYA1	2.9413e-05	0.386192
GPR137B	2.94372e-05	0.357506
GSTT1	2.9752e-05	0.941845
FGF7P3	3.0173e-05	0.249429
MTFR1	3.12487e-05	0.54083
TOX	3.13477e-05	0.415532
MT-CO1	3.16626e-05	0.219631
TSPOAP1	3.21179e-05	0.319784
TPCN2	3.24339e-05	0.482044
FOXO1	3.258e-05	0.304606
AC245060.5	3.28481e-05	0.304481
IL7	3.33664e-05	0.350028
CHFR	3.38398e-05	0.299095
BRINP3	3.40958e-05	-0.333315
PTPN4	3.587e-05	0.226283
LRTM1	3.60999e-05	0.403736
PTGR1	3.62631e-05	0.234844
MINDY2	3.6981e-05	0.298381
PDP1	3.81462e-05	0.547325
LINC02062	3.84235e-05	-0.485465
OPTN	3.91472e-05	0.259717
ARFGEF3	3.93986e-05	-0.195745
AC097467.3	3.96604e-05	0.564965
C2CD5	4.00799e-05	0.221032
PTK2B	4.03254e-05	0.262887
NNT	4.12146e-05	0.271172
COL19A1	4.27145e-05	0.643157
UNC79	4.27647e-05	0.264828
SLC25A37	4.31201e-05	0.357332
MXI1	4.353e-05	0.276408
GDAP1	4.35617e-05	0.216621
UGP2	4.36943e-05	0.331615
TENM1	4.49927e-05	-0.324645
CALD1	4.58263e-05	0.406795
DNAJC1	4.63233e-05	0.269746
MTPN	4.68419e-05	0.285358
NLGN4Y	4.6861e-05	-0.338202
KLHL24	4.70892e-05	0.227686
ZRANB2-AS1	4.7202e-05	0.605248
AC097634.3	4.75427e-05	0.663848
PVT1	4.81715e-05	0.573702
PTPRO	4.83531e-05	-0.218878
NUMB	4.83531e-05	0.321675
AHCYL2	4.98431e-05	0.217915
HNRNPK	5.0321e-05	-0.470956
FAM19A2	5.12199e-05	0.300876
GRK4	5.15886e-05	0.260567
USP45	5.18903e-05	0.351126
ANKRD34B	5.19481e-05	0.625281
KIF16B	5.2157e-05	0.260931
LRMP	5.2157e-05	0.812544
CSMD2	5.30993e-05	-0.186252
AMYH02020865.1	5.3638e-05	0.443739
RPS4Y1	5.37184e-05	-0.798185
PRKD3	5.43772e-05	0.513026
LY86-AS1	5.48568e-05	0.98807
GOLGA8B	5.57027e-05	-0.356624
SRSF5	5.57027e-05	0.209968
CREG2	5.57027e-05	0.418556
TUBB2A	5.73494e-05	-0.865751
NDUFA4	5.81654e-05	0.18521
VPS13D	5.83894e-05	0.228183
CDC40	5.90827e-05	0.29419
CDH9	5.91017e-05	0.26963
CANX	5.95893e-05	-0.486415
ANKRD7	5.99022e-05	0.318316
TMEM130	6.0167e-05	-0.344869
MYH9	6.13645e-05	0.535128
MBP	6.1507e-05	0.27256
FBXL17	6.15464e-05	0.227867
AC011287.1	6.30688e-05	0.438819
TMOD3	6.32531e-05	0.315529
AC022098.1	6.37758e-05	0.48915
AC027018.1	6.38451e-05	0.331421
CCNI	6.69827e-05	0.267009
SLC38A1	6.7123e-05	0.23499
SELENOI	6.99069e-05	0.318891
FP236383.1	7.00112e-05	-0.331167
ZNF862	7.10601e-05	0.481094
AC073336.1	7.13522e-05	0.967442
ZBTB18	7.47748e-05	0.464591
AC092745.2	7.87512e-05	0.313623
RCAN1	7.89275e-05	0.304924
ZNF675	8.12206e-05	0.312222
AC005828.1	8.1711e-05	0.821936
DPYSL2	8.27825e-05	-0.165352
NSMAF	8.42573e-05	0.244279
GRID2IP	8.42573e-05	1.58581
AC007563.2	8.44587e-05	0.256986
FBXL13	8.61358e-05	0.294108
MYLK	8.61638e-05	0.754702
ITFG1	8.67697e-05	-0.103221
AKAP6	8.8444e-05	0.251833
AGL	8.99667e-05	0.378754
RASGRP1	9.14947e-05	0.275019
PPFIBP1	9.27554e-05	0.403627
MTF2	9.2962e-05	0.247771
AL137009.1	9.34857e-05	0.366606
SSX2IP	9.35513e-05	0.264924
PAK3	9.38182e-05	-0.117215
MSMO1	9.39191e-05	0.412619
AC022146.2	9.41783e-05	0.345045
CLEC16A	9.43384e-05	0.227735
CWC27	9.59555e-05	0.239496
AC093110.1	9.6277e-05	0.484345
LRRC8B	9.66467e-05	0.245649
PAPPA	9.66467e-05	1.22953
ZNF565	9.78502e-05	0.3268
OBSCN	9.78502e-05	0.385954
MIR181A2HG	9.89614e-05	0.61343
DLEU2	0.00010204	0.307273
STARD4-AS1	0.000102661	0.515412
AL139294.1	0.000104208	0.354829
CACNA2D3	0.000105578	0.305958
LAMA3	0.000105733	-0.722775
IBTK	0.000105733	0.237277
TIAM2	0.000106521	0.22819
CFTR	0.0001069	0.654176
AL513327.1	0.000107743	0.521819
TMEM108	0.000108766	0.278727
AC011997.1	0.000108786	0.589619
SORBS1	0.000109241	0.229595
PKD1	0.000111353	0.282248
AC103770.1	0.000112115	0.653906
MINDY3	0.000112448	0.262096
PPP4R4	0.000114139	0.230484
DCC	0.000116292	0.283197
AC093865.1	0.000121232	0.54262
SIK3	0.000125399	0.220159
APLF	0.000126591	0.814449
RPL18	0.000127601	-0.67892
ATL1	0.00013068	0.199407
STARD3	0.00013068	0.496642
FABP5	0.000133691	-1.0622
TDRD3	0.000133691	0.22763
AC066613.2	0.000133699	0.502781
PRCP	0.000134847	0.464937
ENAH	0.000134967	-0.277847
ERGIC1	0.000137225	0.30545
EFR3B	0.000137545	0.221604
AC023385.1	0.000138056	1.42503
RHBDD2	0.000138352	-0.534773
UNC13B	0.000138615	0.265014
LRRN1	0.000140584	0.269596
TMEM132D	0.000141092	0.240215
YEATS2	0.000141193	0.214433
GPR12	0.000141193	0.810833
B4GALT6	0.000142007	0.30818
MIR99AHG	0.000143675	0.21462
CCDC144NL-AS1	0.00014368	0.253465
AC055733.2	0.000144262	0.858708
LGR4	0.000144687	0.38975
ARHGEF2	0.000147361	0.56419
ARHGAP22	0.000147471	0.387446
IPCEF1	0.00014822	0.387929
GNG2	0.00014877	-0.352622
TTTY10	0.000149718	-0.501524
Z84485.1	0.000153712	0.792974
MAPKAP1	0.000154497	0.210394
MOB1B	0.00015661	0.407383
ABCC5	0.000156898	0.217341
EPHB6	0.000159013	0.398426
POLR1C	0.000163512	0.364974
CNR1	0.000165834	0.258978
AL031282.1	0.000168156	0.589699
RPS18	0.000170253	-0.611472
MME-AS1	0.000170253	1.5668
CNTNAP2	0.00017193	0.316088
GPC6	0.000173158	-0.344989
SYNE1	0.000173158	0.214432
FASTKD1	0.000173489	0.29411
DHCR24	0.000173489	0.449549
PCDH9	0.000174667	0.241751
CCDC138	0.000174754	0.312776
CUX2	0.000176741	0.509422
PTPRG-AS1	0.00017706	0.426556
TUBA1A	0.000178288	-0.615973
SOX5	0.000178561	0.21736
STPG2	0.000178597	0.469361
CGGBP1	0.000178763	0.258669
LINC01006	0.000180329	-0.659983
WDR37	0.000180917	0.228326
MACROD2	0.000182894	0.320772
AL049869.3	0.000184095	0.679195
TMEM184C	0.000185639	0.444674
CLEC20A	0.000190746	0.919217
EEF1A2	0.00019318	-0.610457
AC117834.1	0.000193902	0.550114
ZNF717	0.00019569	0.331525
FOXP1	0.000198322	0.475567
WWC2	0.000199589	0.262083
GNAI2	0.000200974	-0.660087
NAP1L5	0.000205351	-0.829062
CRYM	0.000207284	-0.760359
ITPK1	0.000208926	0.292742
TOGARAM1	0.000211715	0.225833
CMAHP	0.000214263	0.302084
VRK1	0.000215472	0.353703
MLIP	0.000215472	0.543969
TMEM65	0.000215795	0.33488
MAX	0.000219676	0.260637
OVCH1-AS1	0.000226466	0.381613
MEIS2	0.000226668	0.277824
RSRP1	0.000226695	0.199668
GAD1	0.000226775	-0.331842
TUBB4B	0.000228415	-0.92086
SIDT1	0.000228415	0.310907
TTC3	0.000230486	0.208443
PPFIA2-AS1	0.000230527	0.322344
PSMA1	0.000230527	0.47274
CCDC65	0.000231314	0.310134
RCSD1	0.000231667	1.99042
JAK2	0.000232201	0.230728
AC113386.1	0.000232229	0.917358
CEP128	0.000232501	0.265801
AACS	0.000236273	0.428256
NLN	0.000238008	0.347622
AP002954.1	0.000243124	0.31622
GIT2	0.000244222	0.232316
RAPGEF4-AS1	0.000245427	0.540582
UGGT2	0.00024669	0.206795
FAM242F	0.00024669	0.845947
RPL13	0.000246691	-0.457592
PRMT8	0.000251199	0.293835
AC058791.1	0.00025135	0.423945
PDK3	0.000252131	0.367414
RPL37A	0.00025311	0.194366
GPC5	0.000253617	0.260793
ADCY5	0.000255968	0.266379
RABEP1	0.000259294	0.208947
KAZN-AS1	0.000260485	0.761037
NRN1	0.000261853	0.838432
TRIM25	0.000264961	0.457719
TBL1Y	0.00027038	1.58964
MAP3K4	0.000272752	0.247146
KLF9	0.000272752	0.456024
CLVS1	0.000283622	0.213583
AP1G2	0.00028365	0.42998
AL450332.1	0.0002843	1.02204
AC006058.1	0.000285914	0.436773
TRAK1	0.000287478	0.259282
LINC00624	0.00028823	0.465794
SELENOM	0.000290278	-1.08021
SCLT1	0.000290762	0.200545
FAM214A	0.000291291	0.22974
SRSF11	0.00029151	0.210498
KIAA1328	0.000293233	0.212926
KCNV1	0.000293663	1.30736
GPX4	0.000294971	-0.65474
PIK3CB	0.000296062	0.210471
HIF1A-AS2	0.000296062	0.549977
ACTN2	0.000296706	0.263312
CNKSR3	0.000297001	0.632946
ZBTB1	0.000298676	0.285891
ATXN7	0.000306888	0.225781
EPB41L4A	0.00030939	0.534441
ATF7IP2	0.000310803	0.223913
LPGAT1	0.000311056	0.18955
WDR7	0.000311056	0.199929
BTBD8	0.000311056	0.216201
ST8SIA5	0.000311056	0.293364
AL031428.1	0.000311163	0.328677
MSH3	0.000313082	0.213152
AP1AR	0.000316619	0.407879
TP53TG5	0.000317812	0.512094
PEX5L	0.000319262	0.297138
AC009264.1	0.000321975	1.03725
SCN1B	0.000331584	0.653098
PCMTD1	0.000334073	0.194869
GSTP1	0.000338053	-1.24416
AUTS2	0.000338053	0.321966
ATP6V1H	0.000342198	0.215353
GULP1	0.000342198	0.256923
WDR70	0.000343091	0.207062
SLC38A2	0.000347145	0.327385
MAPKBP1	0.000358756	0.229247
AC073941.1	0.00036029	1.62736
AC098588.2	0.00036165	0.777951
ATG2B	0.000364291	0.227848
ANGPT2	0.000366522	0.426182
GNAI3	0.000368636	0.37823
SDCCAG8	0.000370221	0.204485
BICDL1	0.00037062	0.221641
ZFC3H1	0.00037062	0.232474
AL157829.1	0.00037482	0.968921
LIN28B-AS1	0.000377355	1.16057
KCTD17	0.000380749	0.523877
C15orf53	0.000380749	0.566897
RUNX2	0.000381694	0.432077
KIAA1549	0.000383199	0.245056
DUSP16	0.000385676	0.372309
AC008415.1	0.000386836	-0.722778
AL390334.1	0.000387243	0.451034
MAML2	0.000388091	0.255287
PPP1R7	0.000389009	0.288861
AL445584.2	0.000399198	1.03656
TBCD	0.000400409	0.213623
TRIP11	0.0004016	0.258936
LINC02398	0.000402338	0.426862
DAB2IP	0.000402796	0.402742
H3F3B	0.000402868	-0.526742
SKAP2	0.000407985	0.280772
CKMT2-AS1	0.000408094	0.256698
AC091885.2	0.000412914	0.625532
NDUFS1	0.000416409	0.200588
ALDH3A2	0.000419581	0.347108
AL139095.4	0.000419581	0.40184
DDRGK1	0.000423473	0.454752
CAMK2D	0.000423476	0.222862
DUOX1	0.000425918	0.528053
GLMN	0.000425921	0.271263
FAM171A1	0.000429982	0.18747
CADPS	0.000435288	0.212863
SREBF2	0.000439654	0.205309
CSMD1	0.000439654	0.402729
GOLM1	0.000440015	-0.415567
GRAMD1B	0.000446976	0.225105
RAB40B	0.000455224	0.259941
PLEKHA6	0.000460188	0.192618
PRKACB	0.000464493	-0.0868678
IDI2-AS1	0.000472108	1.47544
BRINP2	0.000483118	0.294424
SLC22A10	0.00048315	0.375467
CFAP61	0.000483671	0.29768
BEX3	0.000485469	-0.563356
AC087280.2	0.000485469	0.274115
FNDC3B	0.000500808	-0.463662
ZNF511-PRAP1	0.000511071	0.285972
SLC6A1-AS1	0.000511959	0.492272
RAP1GAP	0.000521854	0.201639
RPE	0.00052228	0.356307
BMPER	0.000522406	0.385307
ZSCAN31	0.00052849	0.735822
MAPK6	0.00053279	0.265647
CCDC144NL	0.000536139	0.642792
ATP1B3	0.000545906	0.213516
PLA2G4C	0.000545906	0.285748
AC006387.1	0.000552773	0.384459
ZNF407	0.000558043	0.21422
FMO5	0.000559458	0.50037
PHC3	0.000565273	0.202792
RPS5	0.000567792	-0.952324
ABHD12B	0.000572937	1.03562
NDST3	0.000574774	0.218941
MAPK9	0.000574774	0.238875
RASD2	0.000575704	0.556212
AC211433.1	0.000576767	0.264067
SYT1	0.000578476	0.216742
LAMB1	0.000578668	0.223455
ZCCHC7	0.000578761	0.201925
ANKRD30BL	0.000583505	-0.0656823
LSS	0.000583505	0.388748
NCOA3	0.000583505	0.400497
RERG	0.000585502	0.21841
AC007368.1	0.000589184	-0.69987
ALOX12-AS1	0.000599262	0.243001
GML	0.000608116	1.46736
ASTN2-AS1	0.000620336	1.13188
GLRX	0.000621196	0.651688
CCDC171	0.00062158	0.200899
DENND4C	0.000622053	0.212397
CACNA1B	0.000623217	0.230522
NEB	0.000628054	0.505028
KITLG	0.000632656	0.562266
HOPX	0.000633912	0.795232
AC011474.1	0.000634268	0.297549
FAM208B	0.000642172	0.203719
SSR4	0.000645368	-1.42607
ATP8A2	0.000647163	0.247741
PARG	0.000650291	0.210005
C4orf48	0.000652303	-1.0292
TUBB	0.000665439	-0.658691
AC097537.1	0.000668064	0.519673
XRN1	0.000674224	0.190293
PRKAR2B	0.00068202	0.220146
STXBP5	0.000682095	0.202789
ITM2B	0.000698997	-0.388402
TTC21B	0.000703952	0.219538
GCNT1	0.000703952	0.3547
CHRM2	0.000705524	0.655344
CASP8	0.000713966	1.03832
CA10	0.000721404	0.30705
KIAA1958	0.000739104	0.216036
NTRK3	0.0007405	0.206341
TMEFF2	0.000743616	-0.224066
CCDC7	0.000745	0.209773
SMC5	0.000747691	0.22637
AC022414.1	0.000747691	0.858847
SLC35E3	0.000752659	0.253622
BX664727.3	0.000766735	0.27475
TNFSF13B	0.000767124	0.443791
RBM48	0.000771345	0.507108
AMN1	0.000782447	0.245892
ANKRD18CP	0.000798307	-0.486813
COL6A6	0.000799721	0.83654
PRAG1	0.00080152	0.30864
SLC22A17	0.000802084	-0.313912
LCA5	0.000806376	0.41823
AC079117.1	0.000808326	0.513315
NDUFAF5	0.000810009	0.341162
UVRAG	0.000810716	0.181753
EXT1	0.000816219	0.200869
OSBPL3	0.00082543	0.725582
ADAM9	0.000828005	0.303347
ZFHX3	0.000828519	0.174646
MTERF4	0.000832343	0.333364
SLC25A24P1	0.000832343	2.09146
COG6	0.000851493	0.213315
CDC42BPA	0.000854864	0.226555
CPEB4	0.000855395	0.201488
CAMKK1	0.00086488	0.236074
ATP2C1	0.000865175	0.19297
IFI6	0.00087276	-1.05643
CADM2-AS1	0.000874011	0.916758
ELOB	0.000894973	-0.949354
PDCD6IPP2	0.000894973	0.691378
AC241952.1	0.00091541	0.312104
AC008267.3	0.000923079	0.256894
AC009060.1	0.000923702	0.380572
PURA	0.000931177	0.214789
TRPC1	0.000939102	0.206121
AC004253.1	0.000941911	0.526357
PCDH9-AS4	0.000946176	0.553629
PELI1	0.000948821	0.263685
ZNF81	0.000952082	0.337319
MACROD2-AS1	0.00095376	0.397683
LINC00598	0.000954087	0.414789
IQSEC2	0.000963804	0.218164
RAP2A	0.000973832	0.230866
WDFY3	0.000974518	0.212826
STAU2	0.000983832	0.184861
POLR3B	0.000987976	0.424962
PRKAA2	0.00100013	0.230115
DNASE1	0.00103232	0.272633
FCHO2	0.00103404	0.286867
RNF169	0.00103469	0.240106
VGLL4	0.00103846	0.193772
CLIP1	0.00103948	0.19614
MFSD11	0.0010459	0.301409
SLC4A7	0.00106154	0.246418
NIPBL	0.00107532	0.188917
GSR	0.00108282	0.341509
NAGPA	0.00108331	0.501089
EPHA3	0.00108431	0.220199
PRKDC	0.00108463	0.188572
NFKB1	0.00108512	0.323067
AC015971.1	0.00109447	0.410947
PRR3	0.00109454	0.436814
LRRIQ1	0.00109854	-0.557899
P4HA3	0.00109854	0.476592
GAS7	0.00110812	0.201471
QPCT	0.00111031	-1.64359
ATG4B	0.00111398	0.261168
SLIT1	0.00113608	-0.276649
NEFL	0.00114222	0.0279848
KREMEN1	0.00115807	0.579224
RC3H1	0.00116285	0.204593
SLMAP	0.00116977	0.193833
AC004160.1	0.00117066	0.670206
MTCH1	0.00117103	-0.347473
UTP23	0.00120376	0.242034
TBC1D30	0.00122284	0.42549
LINC00271	0.00122638	-0.582207
AP003071.2	0.00122638	0.953974
JAM3	0.00124139	0.228191
PRDX1	0.00124667	-0.960743
BBS7	0.00125757	0.342848
SLF1	0.0012602	0.186544
MRE11	0.0012602	0.348229
AC005037.1	0.00126319	0.329934
STEAP2-AS1	0.00126319	0.469166
STT3B	0.001272	0.237219
ASPHD2	0.00129969	0.517115
RPL28	0.00131487	-0.533227
ANGPTL1	0.00133441	0.491474
ABI2	0.00133962	0.179253
RNASEH2B	0.00134307	0.311398
KIAA1147	0.00134307	0.340622
AC109779.1	0.00134307	1.26614
GOLGA8A	0.00134335	-0.292114
PANK3	0.00134635	0.286072
CDK12	0.00135367	0.223143
ENPP7P8	0.00135367	0.447845
RCN2	0.00135829	-0.507061
GRIK3	0.00136467	0.277995
BMT2	0.00138076	0.204669
MIR4697HG	0.00141164	0.680051
ABHD2	0.00141274	0.193461
USP2	0.00141274	0.737523
ZSWIM6	0.00142463	0.207206
AL158068.2	0.00142463	0.750812
KCNN3	0.00143751	-0.292048
AL359317.2	0.00143809	0.484562
LRMDA	0.00146954	-0.502778
TBC1D12	0.00147449	0.321119
LINC02237	0.00147449	1.41147
BCL11B	0.00148413	0.197516
AC008440.2	0.00151337	0.659607
PLPPR2	0.00151423	-0.48474
MMP16	0.00152275	0.202326
AKAP9	0.00152506	0.190384
TOMM70	0.00152534	0.270644
MAP3K2	0.00152952	0.184917
MSC-AS1	0.00153143	1.72412
RPL23AP49	0.00154267	0.674163
RARRES1	0.00154351	0.480729
WAC	0.0015453	0.17437
WDSUB1	0.00155029	0.314232
SLC17A7	0.0015569	0.539466
CEP290	0.00155833	0.200777
PTPN7	0.00157564	1.31725
ECEL1	0.00157863	-1.94688
PINX1	0.00157863	0.339325
LINC02281	0.00158591	0.937667
RPH3A	0.0016048	-0.372482
DEFB109F	0.00160589	0.20891
USP2-AS1	0.00162321	0.500042
NCAN	0.00162738	0.344996
ZNF680	0.00162774	0.386942
ADORA1	0.00164604	0.536491
RAD54L2	0.00164853	0.344175
PURG	0.00165313	0.231919
AC007192.2	0.00165492	0.38025
MAP4K5	0.00165711	0.181562
FAM227B	0.00166734	0.336276
BIRC6-AS2	0.00168738	0.408149
PATJ	0.00172516	0.196942
FSD1	0.00172578	0.388667
GABRD	0.00172578	0.485936
EFHC1	0.00172654	0.285419
RTKN2	0.00172654	1.60586
PFKFB2	0.00172846	0.883136
TMC2	0.00172866	-0.784108
KSR2	0.00173617	0.234893
PKIA-AS1	0.00173899	0.504014
NETO2	0.00177554	0.204674
ENPP7P10	0.00177554	0.425156
AC005972.3	0.00177554	0.844654
HELZ	0.00177762	0.19304
LRRC6	0.00177762	0.245879
PYGL	0.00182444	0.589369
SHOC2	0.00182647	0.173918
ZNF236	0.00182647	0.272648
SPATA6L	0.00183183	-0.349332
KLHDC8A	0.0018414	-0.531874
MTCH2	0.00184394	0.254654
CRYL1	0.00184782	-0.338108
PPFIA1	0.00185806	0.221367
THOC2	0.00186998	0.19678
ZKSCAN7-AS1	0.00186998	0.286073
GPR135	0.00187602	0.304868
DLEU1	0.00188193	0.339485
ATP2A3	0.00189504	2.31852
AC022872.1	0.00189816	0.490188
KCNIP4	0.00192359	0.42158
FLRT2	0.0019251	0.18979
NPTN	0.00192682	0.167041
GRM8	0.00192834	0.180308
AL139021.1	0.00193037	0.542993
LRRFIP2	0.00194292	-0.172359
SLC23A2	0.00194961	0.184492
MRAP2	0.00196018	0.355251
TBC1D8	0.00197141	0.234475
KATNAL1	0.00197141	0.254241
DIO2-AS1	0.00198448	0.373742
ADRA1A	0.00200859	-0.422384
LYRM4	0.0020288	0.242543
SGO1-AS1	0.00203002	0.667166
TMOD2	0.00203013	0.166106
MAP3K13	0.00203013	0.176378
BCL2L13	0.00204258	0.246452
ZNF529-AS1	0.00205367	0.336105
SATB1-AS1	0.00205367	0.577923
ALG13	0.0020739	0.245719
GPATCH4	0.0020739	0.570214
RELCH	0.00207935	0.183239
NUP88	0.00208437	0.265519
LINC02112	0.00211839	0.413102
TMEM170B	0.00213232	0.316484
AL117336.3	0.00214959	0.30507
NOXA1	0.00217662	0.498978
NBEAL1	0.00218662	0.203968
ADCYAP1R1	0.00218671	-0.410128
MCMDC2	0.0022058	0.673556
SLC32A1	0.00222069	0.558003
FGF13	0.00223455	-0.323553
G2E3	0.00223547	0.217075
OSBPL10	0.00224143	0.222172
B3GNT2	0.00224143	0.560876
CYP46A1	0.0022499	0.203161
ZEB1-AS1	0.0022499	0.579133
PREP	0.00226003	0.326152
MEG8	0.00227412	0.198261
WDR1	0.00229036	-0.742398
PREX2	0.00230725	-0.479568
RGS22	0.00231041	-1.17032
VPS13B	0.0023275	0.200713
AL078459.1	0.00233587	0.51473
LPCAT4	0.00234043	0.244775
ABHD3	0.00234091	0.436554
KMT2E	0.00235703	0.182008
NFATC2	0.00238992	0.828653
AP001266.2	0.00239357	0.385239
VWA8	0.00239772	0.184905
CRADD	0.00239772	0.189086
HMGN1	0.00241599	-0.41342
MIR181A1HG	0.00246721	0.266879
TMSB4X	0.00248494	0.123078
MYSM1	0.00249233	0.224279
GLIPR1L1	0.00250238	0.630397
ALDH1A2	0.00251995	0.780807
TIAM1	0.00252366	-0.117204
TBC1D4	0.00255813	0.221455
ITPR2	0.00256842	0.359823
HSPA12A	0.00256977	0.185898
COX6B1	0.0025703	-0.871827
MAN2A2	0.00258417	0.358059
PIP4K2A	0.00259273	0.207383
BTBD10	0.00261652	0.18226
ZNF248	0.00261652	0.192882
PJA2	0.00262009	-0.236896
NAA16	0.00262222	0.21685
OTOF	0.00264245	-0.648008
AC022540.1	0.0026715	0.574528
FAM66B	0.00269068	-0.446617
GRIK2	0.00270262	-0.0286456
DTWD2	0.00271148	0.24059
SARAF	0.00273072	-0.365537
TMED8	0.00274549	0.183794
ADAMTSL1	0.00278848	0.308693
NCDN	0.00279396	0.150174
MTA3	0.00280449	0.187013
FSTL5	0.00281463	-0.365
OSBPL8	0.00282022	0.206052
RTN4RL1	0.00286522	0.253583
PCNX2	0.00292268	0.202865
HSPA5	0.00294801	-0.742559
KCNJ9	0.00295771	0.559622
SLC22A24	0.00295902	1.09195
PKD2L2	0.00300579	0.574015
IGF1R	0.00304642	0.191878
UNKL	0.00304642	0.452014
DLGAP4-AS1	0.00304674	0.403596
AL118556.1	0.0030546	1.11789
DNAH14	0.00309216	-0.285855
PPP1R12B	0.00310957	0.167404
ELMOD1	0.00310957	0.183619
NALCN	0.00312658	-0.0741574
PNMA5	0.00313049	-0.944222
NXPE3	0.00313505	0.302574
SLC20A2	0.00314378	0.188355
AC092471.1	0.00314926	0.487961
EPHA6	0.00316442	0.252511
ETS2	0.00316493	0.474811
NRP1	0.00319033	-0.43786
ERC1	0.00320169	0.0241894
MAN1A1	0.00321526	0.164774
ARGLU1	0.00327506	0.164981
RAB11FIP3	0.0032816	0.19979
RAB2A	0.00329089	-0.228251
STK32A	0.00329312	-0.951441
NRDC	0.0033554	0.169898
AC034268.2	0.00335801	0.668778
C2orf88	0.00339004	0.294601
CCDC92	0.00339768	0.174654
ZNF519	0.00344906	0.228829
NCALD	0.00346246	0.320442
AMD1	0.00348434	0.247815
PRMT3	0.00350645	0.236712
ANKMY2	0.00351524	0.243212
HSD11B2	0.00352643	2.06954
GDPD1	0.00354093	0.247912
TAF4B	0.00355557	0.370953
OGA	0.00356018	0.170542
TEKT4P2	0.00357969	0.606908
NPM1	0.00358331	-0.65338
WDR63	0.00358666	1.63478
ABCB9	0.00360993	0.255543
SPTBN1	0.00363029	0.16419
SLC6A7	0.00363029	0.338098
ZNF138	0.00365703	0.229262
ATP6V0E1	0.00366958	-0.521041
ZNF814	0.00371497	0.225249
NDEL1	0.00371767	0.255828
AC002116.2	0.00372104	0.554379
ZNF782	0.00372203	0.255162
CCDC18	0.00372283	0.305217
PDZRN3	0.00373464	0.221378
PAK5	0.00374427	0.178009
FBXO33	0.0037687	0.237379
NGLY1	0.00377513	0.242592
RNF111	0.00378548	0.173141
UBE3D	0.00378548	0.201449
ANKRD26	0.00383884	0.179758
SLC4A10	0.00383884	0.196646
BBX	0.00383937	0.18217
RPL8	0.00400262	-0.702876
BBS2	0.00402339	0.195391
GPR180	0.00403228	0.344092
EHD3	0.00409408	0.553882
PKD1P6	0.0041217	0.661459
STAT4	0.00415141	-0.412293
STX18-AS1	0.00415707	0.187859
HLA-L	0.00420113	0.288258
ADARB2	0.00422738	0.283458
USP28	0.00423163	0.331965
ZNF540	0.00425405	0.197705
AC008691.1	0.00426896	0.565793
AC131571.1	0.00428535	0.319018
KCNA4	0.00428692	0.389786
PNKD	0.0043071	0.257451
SGPP2	0.004331	0.259834
TMLHE	0.00436711	0.294817
CENPJ	0.00436972	0.585907
ATG7	0.00438279	0.168257
ATP9B	0.0043969	0.177412
TTC6	0.00441207	0.90376
PI4KA	0.00443144	0.178409
GRID2	0.00445396	-0.0768481
EGFEM1P	0.00445877	-0.388591
PNMA3	0.00446036	-0.513219
ADAM12	0.00446036	0.261159
SLC39A8	0.00446234	1.09164
NPY1R	0.00450726	0.253145
GDPD5	0.00452933	0.836626
WDR12	0.00454885	0.239395
PRMT1	0.00455676	-0.754435
GABPA	0.00456596	0.4475
JAKMIP2	0.00458203	0.180355
BAALC-AS1	0.0045864	0.488947
ATF7IP	0.00459647	0.208723
DACH2	0.00463431	-0.429797
AFDN	0.00465461	-0.200957
DPY19L2P2	0.00467204	0.378194
LENG9	0.00472706	0.621024
ACTN4	0.00476301	0.211975
RGS8	0.00476574	0.389141
MAL2	0.00480075	0.360913
TDRG1	0.00483052	2.11981
MARK3	0.00486144	0.173437
WDR6	0.00486176	-0.572419
TMCO4	0.00491093	0.878156
MUC20-OT1	0.00491535	-0.210398
FAM133B	0.00491853	0.268513
AC002429.2	0.00491986	0.14218
PRMT2	0.00492168	-0.334125
SPDYE16	0.004924	1.33192
PRKCZ	0.00493167	0.172449
AKAP8L	0.00493213	0.187302
STMN4	0.00496968	0.217
AC005261.5	0.00498419	0.692288
GRIA4	0.00499951	-0.233637
GLI3	0.00501588	0.781941
NMT1	0.00503623	0.187377
TSIX	0.00504877	0.0866364
AGPAT3	0.00505663	0.238731
GNL1	0.00516381	0.237359
VPS36	0.00516381	0.308243
LINC01482	0.00518121	1.39362
MDGA2	0.00518193	0.248018
PURB	0.00518193	0.483027
TAPT1-AS1	0.00519952	-0.216611
SPON2	0.00529971	0.889834
LINC00461	0.00531154	0.169565
MYO19	0.00535434	0.426945
STIM2	0.00536628	0.179781
STK3	0.00537164	0.325391
SNTB2	0.00541068	0.353177
SCN2A	0.00549413	0.160851
RNF19A	0.00552861	0.175507
MARK4	0.00553482	0.20735
GABBR2	0.00558558	0.182985
CCDC148-AS1	0.00559199	1.03743
KBTBD12	0.00563592	0.422758
AL590705.1	0.00564308	-0.573659
PRKAR2A	0.00565408	-0.280242
AP005212.4	0.00566778	0.249585
NSFP1	0.00571498	1.15098
CLK4	0.00572453	0.378554
PDCD5	0.00574729	0.367496
RARB	0.00576135	0.208577
MPPE1	0.00578612	0.382077
PDYN	0.00581985	-1.34874
RBPMS	0.00582259	0.508829
SYT4	0.00582606	-0.485846
MTCL1	0.00582606	0.250654
MEGF10	0.00583172	0.434776
SDCBP	0.00590472	0.220711
GOLGA6L7	0.00594294	0.966112
AL355472.2	0.005968	0.812277
VGF	0.00596963	-1.12111
PLCH1	0.00600017	0.366329
SATB2	0.00600495	1.61501
TNIK	0.00600838	0.198596
EPHA5	0.0060244	0.247377
STAG3	0.00604422	0.435387
PHF14	0.00604437	0.181839
MKLN1	0.00604678	0.182401
PTGER3	0.00604678	0.678354
PHYHIP	0.00609465	0.215365
RTL9	0.00613601	0.447368
CSRNP3	0.00613662	-0.0542094
GRIP1	0.00613999	-0.0704142
CRB1	0.00614351	-0.434346
LONRF1	0.00618548	0.253116
PDE4DIP	0.0061941	0.154454
CDKL1	0.0062126	0.237489
UBB	0.00624571	-0.574122
KIAA1211	0.00624758	-0.343852
KCNC2	0.00624853	-0.253773
ATG5	0.00625118	0.195554
FAM49A	0.00625277	0.158945
UPF3A	0.00625277	0.184341
AC092422.1	0.00626693	0.27415
TRAPPC12	0.00627536	0.18122
SUSD1	0.00629347	-0.32728
ARHGEF9	0.0063567	0.161873
IQCB1	0.00637867	0.216497
NECAB2	0.00641817	-0.583497
SPIRE1	0.00647584	0.175343
ADAM17	0.00647955	0.185406
GAP43	0.0065198	-0.223621
PPA1	0.00658777	-0.503503
NPLOC4	0.00659725	0.247305
RPL31	0.00660401	0.193286
PANTR1	0.00660401	0.272577
EIF1B-AS1	0.00662973	0.388674
DIP2B	0.00667893	0.165686
LINC01122	0.00669053	0.181211
KIAA1324L	0.00670649	0.194577
COL10A1	0.00670649	0.528109
BCL2L14	0.00671498	0.314254
B4GALT5	0.00672735	0.186656
DHX32	0.00672735	0.287127
CNTN6	0.00673687	0.326303
ZNF638	0.00679759	0.177792
ALS2	0.00679759	0.237775
AVP	0.00680503	-3.50649
AP000769.1	0.00681852	0.906912
AP002518.2	0.00682749	0.503007
OSTM1	0.00686012	-0.523242
WDR60	0.00686508	0.163783
ZNF26	0.00687564	0.332052
RBM26	0.00694466	0.181501
SESN3	0.00694489	0.165637
DIRC3	0.00696294	0.166711
CMC2	0.0069654	0.219487
FRAS1	0.00697096	0.173518
AC104365.1	0.00697841	0.476828
STK33	0.00698604	-0.669822
AMY2B	0.00699334	0.257904
C3orf70	0.0070434	0.371094
DFFB	0.0070434	0.545904
EXOC6	0.00705222	0.163781
SNAI3	0.00705222	0.59097
SPDYA	0.00710156	0.391606
WDR73	0.00717992	0.276152
TFP1	0.00721183	0.360528
ADGRB1	0.00724173	0.206754
UBN1	0.00725266	0.392543
ZC3H12C	0.00726683	0.25341
PNMA2	0.00729784	-0.259567
CPNE2	0.00731406	-0.835737
SETD3	0.0073413	0.200042
OVCH1	0.00736845	0.344547
METTL9	0.00744993	0.286231
BMPR1A	0.00745221	0.176449
ABHD6	0.0076033	0.282721
KRTAP5-AS1	0.00768288	0.447263
TPM3	0.00770593	0.238536
LMO7-AS1	0.00772942	0.401141
JDP2	0.00773717	0.495757
GK-AS1	0.00773717	0.772469
CBLN2	0.00775715	1.25766
HOOK1	0.00780231	0.231622
EHMT1	0.00787979	0.20162
AC098484.4	0.00788547	0.405184
TSPYL2	0.00792639	-0.285505
MBD2	0.00792639	0.255753
USP32	0.00794432	0.175278
ROCK1	0.00797452	0.166302
COL26A1	0.0079793	0.287984
AC004540.1	0.00798545	-0.506013
HCG17	0.00805342	0.20039
DGAT2	0.00805863	0.845993
FAM153B	0.00810958	0.750618
FZD3	0.00813443	0.171517
CDH20	0.00815141	0.248814
AL442003.1	0.00816524	0.323619
LINC01902	0.0081755	-0.490425
MFAP3L	0.00824659	0.323172
RGS4	0.00826962	0.397978
MIR325HG	0.00832444	-0.330235
CREB5	0.008356	0.505192
PRICKLE2	0.00849701	0.171338
UBE4B	0.00850085	0.164131
NAP1L1	0.00851048	0.156806
XYLT1	0.00858003	0.206166
TCP11L1	0.00858003	0.33159
CARS	0.00858003	0.332877
AC009133.1	0.00858003	0.561754
AC005828.3	0.00858003	0.803359
AHCTF1	0.00858309	0.183069
SLIT3	0.00863922	0.17546
RPL35	0.00866748	-0.509689
ZC2HC1A	0.00878133	0.193104
SHANK3	0.00878133	0.275165
AC034195.1	0.00881921	0.328348
YPEL5	0.00882193	0.258837
DNAJC2	0.00885675	0.296519
LINGO2	0.00888461	-0.226717
SLK	0.00890026	0.235495
ZFR	0.00892177	0.160306
ZNF213	0.00892431	0.339539
AP3S1	0.00904092	0.183578
AC079760.1	0.00907853	0.247416
PTRH1	0.00909231	0.4501
ODF2L	0.00910127	0.171687
HMGB1	0.00913404	-0.122016
LRRC37B	0.00916736	0.249232
LARP1	0.00917568	-0.2076
NR1D2	0.00917568	0.217866
RNPC3	0.00918295	0.165624
DWORF	0.00926618	3.68254
RASA1	0.00934899	0.170292
NDUFC2	0.00937491	-1.39674
AC005920.2	0.00948167	0.522366
VWA5A	0.0095006	-0.590051
TTC28-AS1	0.00953059	0.213527
LGALS3BP	0.00960033	-1.13232
INKA2	0.00960052	0.520181
AC098829.1	0.00961725	0.166589
NME9	0.00961725	0.237528
COA6	0.00961725	0.364535
CHDH	0.00961725	0.701566
AC117383.1	0.00973898	0.566105
TMEM241	0.00974667	0.157959
AL356599.1	0.00981553	0.20051
NAV2	0.00984976	0.229052
GTF3C1	0.00986346	0.202677
PHF3	0.0100277	0.161579
WSB1	0.0100397	-0.20032
MEST	0.0100645	-0.418932
JOSD1	0.0101185	0.391065
ATPAF1	0.0101262	0.19311
AL110292.1	0.0101262	1.27899
AP003025.2	0.0102625	0.965366
UTY	0.010335	-0.25938
CLOCK	0.010352	0.159709
AC092802.1	0.0104261	0.57803
ZMAT1	0.0104291	-0.37232
EEF1A1	0.0104964	-0.417358
IFNGR2	0.0104966	0.158472
GRID1	0.0105134	0.21638
ZNF433-AS1	0.0105172	0.467356
LAMA2	0.0105353	0.397266
SIPA1L1	0.0107648	0.22934
PRUNE2	0.0107794	0.151232
RHOT1	0.0107794	0.173253
PEX1	0.0107794	0.237718
KDM5D	0.0108379	-0.380881
ANKRD36C	0.0108744	0.174042
ZDHHC17	0.0108752	0.155983
PNMA8C	0.0109171	-0.894664
FAN1	0.0109923	0.332519
SLITRK5	0.0110606	0.199649
MAPT	0.0111776	-0.0713577
RETREG1	0.0111776	0.158594
[truncated: 489 more rows]

## Sheet: GeneLists_individual_Mutants
		LRRK2G2019S	id	baseMean	log2FoldChange	lfcSE	stat	pvalue	padj	signed_p		PINK1P399L	id	baseMean	log2FoldChange	lfcSE	stat	pvalue	padj	signed_p		PINK1P399L	id	baseMean	log2FoldChange	lfcSE	stat	pvalue	padj	signed_p		PINK1P399L	id	baseMean	log2FoldChange	lfcSE	stat	pvalue	padj	signed_p		Rab39BG192R	id	baseMean	log2FoldChange	lfcSE	stat	pvalue	padj
			Hr38	45.7309	2.4261	0.869045	3.54922	0.0449108	0.262093	11.1048			lncRNA:CR40469	32.9919	5.29689	1.38933	4.18509	0.0213405	0.313957	43.2433		Neurons	CG42847	6.37496	5.684	1.14688	5.02845	0.000193012	0.12576	38.6594		Glia	lncRNA:CR40469	165.568	9.84192	1.20244	8.41362	1.08263e-11	4.70943e-09	166.999			sif	93.4072	1.91204	0.29442	6.54998	4.33985e-07	0.00017597
			Syt7	72.8457	0.969582	0.230431	4.9369	0.0112345	0.229659	7.85471			Ubi-p5E	46.4453	1.41768	0.297051	5.36627	0.0136453	0.117039	11.4523			Ubi-p5E	50.8873	1.39043	0.260681	5.71607	0.000159577	0.0815042	12.0792			CG34423	5.29915	4.49078	1.28824	3.54158	0.00311899	0	17.081			asRNA:CR43933	7.6857	6.06973	2.93043	2.2096	0.0635418	0.122912
			Syp	69.6451	0.86129	0.26488	3.74132	0.0226755	0.318075	4.0856			mt:CoIII	296.51	0.704451	0.18321	4.59515	0.0231131	0.255465	4.91771			lncRNA:CR40469	2.39747	4.24804	1.43246	3.20927	0.0262652	0.386408	14.6843			CG8321	12.1759	3.44144	1.03105	3.63026	0.00733633	0.112103	13.4311			Ubi-p5E	71.9884	1.27571	0.25352	5.37185	0.00175082	0.0213877
			CG11155	35.6588	0.893163	0.33237	3.16562	0.054927	0.357567	3.07108			mt:CoI	482.188	0.541099	0.173786	3.74356	0.0381121	0.299883	2.56785			mt:CoIII	264.551	0.730388	0.156662	4.7514	0.00165479	0.239592	5.19726			CG9689	85.8811	3.89303	1.44892	2.82931	0.00794356	0.0491481	8.53278			Snap25	114.651	1.10296	0.232808	4.90301	0.00216162	0.0217137
			CAH8	4.96547	1.4044	1.14269	1.65246	0.212992	0.185671	1.74702			CG10353	2.06931	2.4143	1.32723	1.95155	0.160827	0.432002	4.41647			CG10353	2.34338	2.5715	1.179	2.19649	0.102983	0.531695	5.21926			CG9691	101.759	2.86968	1.17119	3.02194	0.0147518	0.230401	6.38663			CASK	78.7545	1.03623	0.252139	4.29825	0.00138731	0.0367371
			Snap25	86.4788	0.558753	0.224578	2.89506	0.092277	0.374971	1.94538			mt:ND5	30.694	1.27819	0.488788	3.05552	0.0900518	0.564995	5.18205			mt:CoI	419.538	0.56617	0.139518	4.03229	0.0050174	0.23509	2.8876			CG18343	3.85212	3.89719	1.35985	2.93463	0.0392187	0	12.4935			Liprin-gamma	61.207	1.1567	0.26159	4.63285	0.00300959	0.0633895
			CG42855	3.25554	1.92353	1.37644	1.9888	0.262014	0.185671	4.84652			CG14757	23.6917	0.855941	0.451415	2.08191	0.116811	0.660545	1.65951			VepD	10.0291	1.4948	0.823907	2.22245	0.110042	0.559419	2.92636			CG10932	4.90546	3.81293	1.33565	2.82794	0.0518057	0.0172704	11.3476			RhoGAPp190	34.8062	1.54343	0.482495	3.31756	0.00924793	0.0841881
			Kr-h1	6.11869	0.988586	0.709811	1.51183	0.200533	0.258298	1.11049			mt:ND4	47.0108	0.795349	0.393033	2.57964	0.118465	0.657999	2.50498			mt:ND5	25.8751	1.34492	0.499739	3.07791	0.0869284	0.590678	5.47088			Gfat2	5.08964	2.69221	1.43532	2.03835	0.0716012	0	3.72717			Cp110	27.1771	1.34577	0.35824	3.93715	0.00915151	0.0633926
			Hsp68	82.1821	2.44788	0.955063	3.49867	0.18027	0.313293	19.7617			CG8768	1.5243	2.01416	1.94032	1.35253	0.324907	0.440856	2.48791			mt:ND4	40.0967	0.833679	0.372415	2.63079	0.0736542	0.707236	2.61374			CG17224	2.67341	3.23431	1.88986	1.71389	0.0985662	0	3.5991			Nrx-1	33.5344	1.28758	0.348679	3.9045	0.00727936	0.0850467
			Nlg2	31.3783	0.65953	0.52101	1.82603	0.146324	0.539683	0.8793			mt:ND6	19.302	0.644049	0.525129	1.29948	0.307461	0.863337	0.696855			CG8768	1.76273	2.12093	1.86767	1.50511	0.285095	0.542592	2.93784			CG14757	13.3072	1.54524	0.590552	2.98078	0.0254074	0.340206	4.57209			Galphao	49.2372	1.09874	0.289665	4.07758	0.00467338	0.0640717
			Hsp23	207.768	2.31726	1.12823	4.1261	0.232714	0.241195	21.3983			CG1840	1.70164	1.58306	1.28358	1.21345	0.265805	0.499247	1.56856			Gapdh1	39.7761	0.637961	0.324279	2.086	0.0902129	0.831377	1.10866			l(2)03659	1.35526	2.98633	1.72884	1.82996	0.117934	0	4.06677			Lar	46.1965	1.05051	0.285694	3.82597	0.00396481	0.050842
			Vha16-1	172.186	0.381548	0.17205	2.56024	0.103418	0.434451	0.959981			mt:CoII	344.414	0.508079	0.183423	3.3301	0.107154	0.505002	2.54516			CG14757	26.0881	0.696871	0.419307	1.87448	0.137904	0.73447	0.987377			CG44303	1.14099	2.77942	1.65939	1.73782	0.113024	0	3.26632			Alk	46.14	1.08919	0.327948	3.65772	0.00540754	0.0810669
			asRNA:CR44030	1.27248	3.30633	2.15548	1.9718	0.201602	0.124414	7.79022			udd	1.85468	1.64855	1.35649	1.26392	0.271173	0.436766	1.55226			CG1840	1.88904	1.7276	1.32988	1.35458	0.260031	0.614457	1.77703			Obp44a	95.5441	1.9834	1.25146	2.54261	0.0883437	0.0991422	3.42076			EndoA	24.8065	1.27712	0.374059	3.62586	0.0107756	0.103936
			CG11000	89.1957	0.532437	0.253864	2.78053	0.178542	0.459462	2.08537			mt:lrRNA	169.066	0.905488	0.335937	3.02072	0.136524	0.436294	3.64545			CG6329	118.653	0.368897	0.182653	2.12404	0.0730349	0.90292	0.611727			Col4a1	25.0103	1.62289	0.844174	2.33788	0.0696115	0.168106	2.79769			Toll-6	32.133	1.5124	0.500226	3.71651	0.0178263	0.0756963
			fz2	28.6052	0.655131	0.40521	1.67614	0.167685	0.527787	1.00278			blw	119.208	0.278402	0.214368	1.39184	0.267616	0.919649	0.349041			asRNA:CR43933	0.557674	2.03424	2.72852	0.960491	0.453292	0.460642	1.64197			CG14207	6.20919	1.73586	0.96461	1.80943	0.0763671	0.225353	2.0344			Toll-7	8.40693	1.97578	0.926787	2.96185	0.0659378	0.0567991
			ftz-f1	36.6711	0.559511	0.335025	1.94187	0.140352	0.626942	1.01366			CG42847	5.18323	4.59261	1.1527	4.07836	0.0568815	0.10218	31.4097			mt:ND6	14.2861	0.690548	0.527318	1.38088	0.290905	0.875733	0.799445			lncRNA:CR13130	9.25655	1.99214	1.02152	2.04058	0.100949	0.0317641	3.68547			para	93.3346	0.901572	0.239154	3.99077	0.00465115	0.0532938
			lncRNA:roX2	85.4957	0.557754	0.277795	2.05449	0.144293	0.625185	1.21608			Gapdh1	54.8627	0.588359	0.328917	1.88279	0.103839	0.786672	1.00797			mt:Cyt-b	256.564	0.35558	0.158724	2.08061	0.182988	0.719816	0.915586			Sting	9.03017	1.94406	1.04276	1.96094	0.109102	0.457852	2.97104			CG42750	54.0466	1.04959	0.284347	3.81965	0.00998612	0.0815004
			mt:ND5	32.7852	0.704901	0.442597	1.91644	0.192215	0.532293	1.17317			porin	105.788	0.47521	0.222772	2.30081	0.160138	0.619361	1.29544			eag	8.97381	0.637942	0.637365	1.11537	0.349652	0.917152	0.545863			udd	2.24042	2.20205	1.40534	1.53526	0.157672	0	2.35044			Msp300	101.598	0.961023	0.261733	4.17933	0.00944615	0.0998355
			Rab11	17.7715	0.725575	0.513571	1.72494	0.220991	0.451059	1.14033			mt:ND1	46.3284	0.611624	0.328531	2.22168	0.228801	0.727723	2.34325			PMCA	32.1275	0.400388	0.315506	1.34487	0.281435	0.978201	0.424906			CG31706	149.102	2.46996	0.894773	3.06218	0.00711705	0.0787535	5.756			tou	18.618	1.35612	0.470474	3.27501	0.0327982	0.0885879
			CG4297	7.00919	0.991447	0.880137	1.28561	0.277315	0.328972	0.893854			Asap	2.14244	1.28445	1.19705	1.03946	0.403354	0.499247	1.69592			nSyb	121.958	0.254293	0.170268	1.53533	0.209028	0.904672	0.309044			Ubi-p5E	27.1965	1.53577	0.454656	3.85046	0.0720836	0.271023	8.73536			fz2	34.3488	1.15449	0.387782	3.27851	0.0160998	0.0626744
			sky	46.0846	0.451369	0.286487	1.84446	0.167999	0.586008	0.697085			Rab11	9.043	0.666652	0.603617	1.13097	0.360032	0.810305	0.629636			Chc	4.73567	0.799782	0.806343	0.939552	0.415491	0.844881	0.584172			CG5721	1.66415	1.91727	1.63721	1.18327	0.238989	0	1.19941			CBP	1.41442	3.58128	1.8927	2.24919	0.129789	0.0089537
			Pur-alpha	94.5104	0.41628	0.205477	2.3994	0.153978	0.52041	1.21814			Non1	19.0715	0.533289	0.430875	1.13663	0.317836	0.952879	0.487348			Vha16-1	102.715	0.25044	0.183665	1.42185	0.226283	0.95014	0.269325			Arc1	3.4755	2.75622	1.70116	1.50913	0.192368	0	3.40305			Dora	34.1729	1.02336	0.322595	3.3767	0.0108361	0.121792
			bol	40.2046	0.497414	0.332825	1.85867	0.198031	0.557017	0.781914			mt:Cyt-b	305.516	0.304605	0.187841	1.77122	0.252388	0.72856	0.752826			mt:CoII	292.764	0.522372	0.152462	3.3683	0.0859838	0.498303	2.60505			CG11892	7.40886	1.76315	1.81591	1.27186	0.265368	0.0547073	1.01349			Asap	6.0095	1.73025	0.779695	2.37546	0.050707	0.0669309
			Dora	28.4302	0.567615	0.340809	1.91239	0.203649	0.577622	1.07623			CG7637	1.45682	1.0165	1.76394	0.724319	0.520857	0.499247	0.629728			nrv3	502.333	0.206147	0.124397	1.61016	0.231622	0.846857	0.329266			CG17985	1.45417	1.82223	1.68259	1.13366	0.27396	0	1.10524			Ubr1	7.86875	1.71732	0.659029	2.76205	0.0472581	0.0731316
			CG44153	9.05405	0.879083	1.04271	1.08901	0.328618	0.415051	0.499133			Vha16-1	92.0163	0.244771	0.213339	1.27823	0.286675	0.934873	0.242001			blw	131.028	0.230037	0.189166	1.30631	0.273455	0.994373	0.221813			mt:ND5	51.5757	0.989026	0.441333	2.95849	0.103587	0.453704	3.93048			CG6220	1.48325	3.7796	2.46276	1.84202	0.180414	0.0450859
			Kdm4B	8.6219	0.780277	0.606723	1.43174	0.261622	0.28863	0.975029			asRNA:CR43933	0.45588	1.59074	2.43778	0.762833	0.416966	0.374271	1.32736			Rop	27.5957	0.337143	0.331543	0.99997	0.372081	0.998254	0.241926			Sod3	190.94	0.718621	0.455496	3.21078	0.133582	0.287287	2.15042			mAChR-A	27.4209	1.04871	0.398771	2.82975	0.0187871	0.135851
			tun	10.3816	0.756017	0.645152	1.52224	0.290583	0.322036	1.09014			Gapdh2	87.7396	0.306096	0.239776	1.25567	0.290804	0.893851	0.337164			ox	39.5896	0.285292	0.279295	1.08594	0.347998	0.998254	0.225586			Nmdmc	3.337	1.44347	1.12872	1.31893	0.204136	0	1.09618			CG12605	49.265	0.865423	0.272341	3.35262	0.0216932	0.138726
			Glut4EF	93.8988	0.333188	0.187177	1.95414	0.149514	0.58909	0.599207			ATPsynC	218.89	0.230856	0.175755	1.43106	0.306417	0.873121	0.365704			mt:lrRNA	123.947	0.874083	0.317623	3.00099	0.142241	0.468801	3.5834			CG14722	1.26986	1.93194	1.64275	1.23266	0.268939	0	1.52811			plum	15.5294	1.31024	0.535581	2.69643	0.0423868	0.130711
			l(3)80Fg	80.9046	0.35492	0.22275	1.8672	0.212087	0.572237	0.65039			vsg	6.50908	0.684397	0.804446	0.849909	0.450955	0.801701	0.542307			udd	1.76566	1.52082	1.34522	1.2013	0.297365	0.537558	1.36807			Tsp42Ed	13.5447	1.79137	1.77276	1.07796	0.304135	0.229371	1.03004			CG42613	45.5383	0.983125	0.354533	3.24728	0.0310399	0.0991419
			sno	32.5467	0.461896	0.328952	1.51878	0.229537	0.711661	0.607963			Chc	4.62944	0.684536	0.835943	0.806773	0.443935	0.686466	0.48743			miple1	116.872	0.219065	0.174262	1.27816	0.301445	0.921693	0.242093			mt:lrRNA	364.583	1.04158	0.415297	3.10622	0.11175	0.295431	3.91434			Usp7	28.8807	0.992033	0.364517	2.98393	0.0261976	0.181948
			CG17272	18.3823	1.71453	0.516085	4.09896	0.071994	0.260509	10.1317			sesB	284.626	0.232312	0.169847	1.56556	0.304488	0.851756	0.596587			Cam	374.475	0.323736	0.127517	2.63993	0.157214	0.564018	1.00722			Stt3B	2.16061	1.76766	1.31724	1.32231	0.210799	0	1.50057			brp	29.3711	1.03259	0.342121	3.20739	0.0291662	0.162077
			futsch	258.175	0.323914	0.174182	2.08428	0.162491	0.57021	0.699114			CG7781	61.5335	0.2589	0.248147	1.12562	0.258273	0.908348	0.250981			Ca-alpha1D	10.8418	0.618369	0.485222	1.27035	0.247269	0.998254	0.538737			hdly	0.915408	1.88177	1.81093	1.03749	0.305426	0	1.02648			His3.3B	22.3956	1.08635	0.404676	2.93338	0.0394359	0.139773
			glob3	0.620822	2.68092	1.99654	1.39594	0.190762	0.0624704	3.3555			TyrRS	3.34982	0.644694	1.04569	0.635322	0.557769	0.561622	0.356903			Ddc	36.1871	0.731889	0.635025	2.2193	0.243531	0.707231	2.39692			CG31808	20.6144	0.920948	0.504567	1.77745	0.0955061	0.502	1.15749			sbb	105.855	0.717596	0.225757	3.26869	0.0102422	0.11795
			Eip63E	39.6807	0.410162	0.312448	1.44995	0.21374	0.692812	0.424158			PMCA	27.7531	0.215444	0.392951	0.999032	0.336349	0.943007	0.189534			alpha-Man-Ia	4.8144	0.462392	0.767616	0.654649	0.556478	0.768075	0.232551			CG5254	13.9184	1.30331	0.92956	2.12648	0.196446	0.000539418	2.25285			Hs3st-A	40.9632	1.02007	0.373988	3.06451	0.0435252	0.108686
			Dyrk3	42.4375	0.405184	0.28783	1.74846	0.246105	0.616829	0.749329			ox	36.9821	0.259661	0.304473	0.996676	0.37379	0.93959	0.241072			mt:ND1	42.1071	0.621428	0.313415	2.2134	0.177981	0.746818	1.99099			eEF1alpha1	140.112	0.724628	0.452722	2.14474	0.0910602	0.539142	0.988085			Dscam2	64.9483	0.838575	0.247156	3.54238	0.0196449	0.131163
			CG15628	66.6827	0.518591	0.415723	1.4509	0.25086	0.654492	0.530296			Pglym78	55.3388	0.268387	0.283729	1.03938	0.44165	0.888891	0.308739			porin	117.139	0.39898	0.191162	2.24982	0.174538	0.641088	1.02463			M1BP	1.01602	1.94465	2.09334	0.95041	0.345965	0	0.90654			lncRNA:CR45758	8.08269	1.85149	0.890024	2.76525	0.0858908	0.0822345
			nAChRalpha5	60.5221	0.681461	0.319027	1.76015	0.225447	0.645255	2.22344			dsh	1.16488	1.3131	1.70221	0.810669	0.398763	0.499247	0.874476			beat-IIa	21.1486	0.857713	1.07003	1.11447	0.296135	0.806336	0.717045			SPARC	141.79	0.91399	0.526342	2.32099	0.122949	0.334905	1.7701			crc	9.07741	1.49452	0.667138	2.46231	0.0713574	0.0936125
			Tet	50.488	0.414623	0.251917	1.85753	0.241341	0.600503	0.857621			CR32745	0.425877	1.21441	2.50566	0.528851	0.514336	0.374271	0.586518			14-3-3epsilon	102.036	0.202474	0.177072	1.05797	0.382107	0.933216	0.221385			CG32695	2.14479	2.56793	2.34755	1.71215	0.320893	0	5.35747			lncRNA:CR45054	9.52609	1.33572	0.578849	2.39281	0.0511635	0.144003
			anne	43.5171	0.411247	0.277463	1.79063	0.270658	0.633615	0.942389			CG31808	48.2305	0.575358	0.334458	1.74418	0.24517	0.663141	1.40068			CG14440	2.36286	1.08288	1.12804	0.973427	0.367277	0.691227	0.766911			mt:CoIII	434.997	0.592056	0.29825	3.91807	0.116099	0.32425	3.70631			Ca-alpha1T	21.3316	1.31185	0.571427	3.08612	0.0802979	0.105933
			spen	132.91	0.303189	0.174797	1.83205	0.160717	0.638289	0.547362			VepD	8.17045	1.00147	1.15913	1.75308	0.173975	0.454528	2.33457			Asap	2.33956	1.38253	1.11089	1.16337	0.3503	0.614457	2.02143			CG1468	9.25892	1.87358	1.41275	2.0224	0.249161	0.00019879	3.29529			qvr	95.2283	0.709082	0.219711	3.40864	0.0130491	0.0981323
			Stlk	18.2227	0.495371	0.414563	1.32122	0.292445	0.627378	0.537419			Cam	311.299	0.209092	0.218266	2.13888	0.187508	0.580278	0.729187			dsh	1.30113	1.48169	1.59095	0.906989	0.36326	0.614457	1.01163			Ech1	3.91577	1.32453	1.15781	1.27846	0.246161	0	1.01442			CG13954	18.9991	1.21346	0.541633	2.56753	0.0488469	0.131092
			Hsp83	119.191	1.30174	0.258849	5.05069	0.0655482	0.174902	13.2523			Cyp1	86.873	0.192903	0.228927	0.846925	0.438272	0.944059	0.124801			Appl	70.8073	0.362292	0.22267	1.61226	0.188653	0.974643	0.468148			Idh3a	14.8685	0.894268	0.581294	1.67678	0.138789	0.604034	0.982401			psq	33.8318	0.913207	0.323582	2.98178	0.0274726	0.149447
			sif	49.0186	0.381825	0.284985	1.5104	0.25732	0.661353	0.485806			alpha-Man-Ia	4.30408	0.385965	0.852153	0.534448	0.590266	0.624061	0.187433			Rab11	8.90227	0.649731	0.602144	1.09684	0.359953	0.844881	0.568599			CG2200	1.72309	1.5492	1.45625	1.05928	0.290115	0	0.84274			mRpS5	18.7532	1.10431	0.437852	2.68426	0.0453976	0.194339
			sm	132.346	0.317879	0.231419	1.70653	0.271762	0.577774	0.55735			14-3-3epsilon	91.1206	0.187293	0.208473	0.967645	0.334703	0.875918	0.220037			CR32745	0.511164	1.46381	2.82291	0.6418	0.563345	0.460642	0.720544			Inx2	36.8271	0.96673	0.611243	1.81982	0.0907396	0.324121	0.982062			SPR	16.1681	1.4117	0.89234	2.55183	0.113926	0.105585
			Abcd1	6.78178	0.662655	0.682963	1.12209	0.380178	0.185671	0.653971			Cul4	1.54077	1.06098	1.56009	0.742182	0.499948	0.499247	0.612987			RYBP	2.45839	0.949745	1.17163	0.914856	0.379761	0.614457	0.692325			Mpc1	4.73083	1.15422	0.895202	1.37835	0.193238	0	0.930847			tai	34.1485	0.850537	0.310151	2.8444	0.0263665	0.145681
			Larp4B	25.9969	0.395521	0.395169	1.15943	0.30791	0.790164	0.284791			RYBP	2.30194	0.857526	1.2147	0.815038	0.4213	0.499247	0.597058			CG11155	15.4669	0.471775	0.389626	1.26156	0.218891	0.98377	0.535897			CG6028	9.81187	1.07314	0.805069	1.46379	0.200786	0.244024	1.01039			Snap24	4.71585	1.85866	1.03049	2.13007	0.126611	0.0807097
			unc-13	188.288	0.253028	0.156132	1.88878	0.206471	0.616927	0.518134			CG34423	2.89173	2.9051	1.9266	2.21463	0.271614	0.253566	13.4625			Syt1	84.8688	0.271656	0.203285	1.44803	0.213567	0.998254	0.312088			porin	56.5979	0.805538	0.35975	2.52177	0.0977386	0.525214	2.46898			mt:srRNA	2.23308	2.15688	1.3824	1.74178	0.145684	0.0450859
			Hsp27	82.6445	2.19122	1.21806	2.64945	0.208476	0.293576	10.2177			CG14440	1.97897	0.949426	1.45026	0.810785	0.455775	0.561622	0.632323			Sap47	189.428	0.131181	0.149671	0.881027	0.44611	0.998254	0.0959498			pAbp	56.0439	0.644291	0.301693	2.56631	0.0965295	0.489019	1.75115			CG32767	42.7231	0.808352	0.295951	2.95029	0.0345223	0.182128
			Hsp70Bc	97.5969	2.16086	1.00371	3.28485	0.176239	0.278133	10.7791			CG11155	14.3067	0.359461	0.432882	1.07455	0.23392	0.878455	0.417656			Ubqn	3.06325	0.851848	0.948173	0.866565	0.402588	0.614457	0.585308			mt:ATPase6	610.913	0.676737	0.334409	3.7011	0.149906	0.286111	3.36741			trv	67.3383	1.05893	0.570176	3.2617	0.0688167	0.134388
			CG5377	4.20342	1.10337	1.47339	0.872472	0.47251	0.248155	0.783212			Ubqn	2.96646	0.679023	0.990986	0.71465	0.421707	0.499247	0.454726			Non1	18.4971	0.515507	0.406117	1.14618	0.32645	0.989594	0.51456			Tpr2	5.81015	1.11297	0.823627	1.3361	0.185626	0	0.853301			Hex-A	55.1699	0.768271	0.280345	2.87062	0.0236956	0.143812
			Eip75B	102.049	0.283225	0.195087	1.61417	0.252738	0.684241	0.539732			14-3-3zeta	238.778	0.172147	0.194579	1.36491	0.221155	0.87745	0.285135			Cul4	1.71436	1.08905	1.45681	0.764503	0.499157	0.614457	0.62918			CG13907	7.28615	1.58496	1.46117	1.15798	0.287886	0.193136	1.08644			Rbp6	216.415	0.665703	0.186873	3.79999	0.0389485	0.111324
			Hsp26	302.559	2.37253	0.861484	4.43179	0.12778	0.171417	25.3053			Dci	0.691013	0.806293	2.22124	0.378851	0.595768	0.436766	0.28099			igl	107.491	0.268695	0.367367	1.85633	0.215321	0.718431	0.946923			mt:ND3	13.8685	1.16867	0.621462	2.12174	0.162969	0.531563	2.37841			ari-1	13.5158	1.14776	0.49152	2.5871	0.0734953	0.142961
			DnaJ-1	37.0259	1.61407	0.441253	3.57526	0.152309	0.151197	10.137			Vha14-1	43.7581	0.158418	0.273005	0.578487	0.540353	0.97543	0.0778804			14-3-3zeta	277.923	0.213286	0.156097	1.53059	0.237052	0.929151	0.319679			CG7272	10.9411	0.939119	0.731691	1.45288	0.190095	0.0477324	0.771407			Syt7	58.8092	0.710855	0.254119	2.96782	0.0264212	0.183258
			qvr	89.5582	0.400322	0.217746	2.19124	0.143872	0.538276	0.85627			Ypel	3.30144	0.661285	0.961216	0.651246	0.464443	0.624046	0.391154			mamo	92.7571	0.370292	0.451185	1.29281	0.247903	0.874384	0.451388			CG1648	12.2294	1.64355	0.942123	1.73713	0.177044	0.330289	2.42244			Gprk2	17.9365	1.09558	0.515487	2.38131	0.0676286	0.1571
			Nlg3	72.7965	0.491766	0.303062	2.18262	0.169095	0.429922	1.01497			CG6329	96.9633	-0.118546	0.483946	1.55384	0.104731	0.733623	-0.124881			vsg	5.16314	0.749594	0.825686	0.937255	0.404985	0.844881	0.639588			ics	2.93614	1.34786	1.19396	1.12431	0.261721	0	0.793722			bun	94.9137	0.63668	0.218465	3.07152	0.018696	0.155607
			scrt	67.8475	0.486724	0.26389	2.11958	0.14799	0.505522	1.01886			RpL17	44.6957	0.289095	0.306056	0.87632	0.368583	0.935963	0.21592			CG7637	1.5164	0.90346	1.76503	0.698056	0.540158	0.614457	0.590158			CG7781	84.8752	0.543391	0.30097	2.03035	0.0799049	0.518756	0.760476			ox	64.1639	0.70736	0.267924	2.74571	0.0268146	0.17283
			CaMKII	100.241	0.393562	0.205061	2.32218	0.138472	0.51959	1.12896			Atpalpha	159.024	0.180817	0.20299	1.2291	0.369197	0.92223	0.283995			Ada1-2	0.770459	1.04933	2.06873	0.644329	0.576908	0.537558	0.65363			MFS9	8.98365	2.09997	2.06596	2.20934	0.266107	0.000260767	4.44716			CG6700	26.5031	0.93369	0.374653	2.68106	0.0706839	0.199135
			Pdf	1.07369	2.44768	2.81212	0.888371	0.422829	0.185671	1.65797			Ada1-2	0.689154	0.861525	2.25286	0.524701	0.597192	0.436766	0.524659			CBP	0.838787	1.97564	1.92551	1.26788	0.282802	0.383757	2.95538			HP1b	1.03332	1.72119	1.97107	0.882472	0.377991	0	0.721781			wry	33.0323	1.06746	0.571735	2.50972	0.067647	0.206016
			CASK	61.7384	0.514297	0.258962	2.34152	0.128856	0.526346	1.689			beat-IIa	17.4025	0.311453	1.11446	0.807208	0.247844	0.655148	0.221653			Atpalpha	153.046	0.226384	0.168952	1.4312	0.312048	0.950947	0.343636			fray	3.36284	1.25447	1.03214	1.20378	0.240269	0	0.868403			Tob	59.3929	0.747331	0.279596	2.77136	0.0313293	0.17683
			mtd	77.0998	0.450094	0.235027	2.3596	0.094738	0.427058	1.14311			Vha44	27.5794	0.272765	0.344673	0.765851	0.499235	0.95602	0.178097			Gapdh2	75.5486	0.265769	0.227834	1.14948	0.309441	0.975005	0.266711			Ccm3	4.5289	1.13884	0.910878	1.36398	0.246356	0	1.10126			Shab	17.5111	1.09584	0.620495	2.62114	0.112051	0.193839
			klg	81.3192	1.21203	0.751958	1.72207	0.201459	0.461301	1.96547			Gdap2	14.6093	0.369793	0.520821	0.783016	0.503148	0.811081	0.262945			GABA-B-R1	20.9808	0.355614	0.371368	1.02891	0.362227	0.943715	0.345775			CG9336	6.71002	1.82588	1.28914	1.38076	0.243287	0.299607	1.93796			Vha16-1	175.481	0.587891	0.204579	2.93604	0.0173331	0.157514
			Tdg	26.7765	0.572993	0.374105	1.89955	0.172771	0.597789	1.11506			CG3726	8.90638	0.27355	0.909354	0.711881	0.408505	0.686485	0.245136			Gpdh1	20.9339	0.388038	0.389523	0.916396	0.379704	0.997936	0.285106			Oda	290.43	0.577876	0.362803	2.11898	0.0901236	0.538381	0.758898			Dscam4	15.7063	1.07914	0.515444	2.20474	0.0820984	0.239466
			stv	41.5804	1.1215	0.364001	3.09093	0.0769411	0.306386	5.44414			Pfk	10.9598	0.373494	0.575579	0.646085	0.530775	0.799814	0.270068			Asator	9.80098	0.378352	0.501587	0.777795	0.40398	0.998254	0.17672			CG11537	5.38821	1.41618	1.00983	1.31208	0.209894	0.229371	1.18553			PAN3	47.8762	0.733019	0.304733	2.56988	0.0406567	0.199873
			Hsp70Ab	3.35198	1.90259	1.55323	1.52152	0.312202	0.185686	3.31275			Dph2	1.09545	0.750884	1.81241	0.431647	0.579268	0.436766	0.377834			CG14669	3.10882	0.619421	1.0263	0.641057	0.557697	0.614457	0.286373			Mmp1	2.14502	1.88405	2.16748	0.875909	0.382023	0	0.788619			tyf	15.3905	0.994246	0.474617	2.19826	0.0699464	0.20622
			CG34355	43.4056	0.745813	0.652983	1.76545	0.189452	0.420016	1.16022			Syt1	69.5607	-0.0356072	0.408284	1.01896	0.214106	0.819733	-0.544215			CG3726	10.5876	0.559894	0.540237	0.879285	0.395264	0.844904	0.491507			Adgf-D	29.9855	1.45664	1.09214	1.78678	0.213189	0.3279	1.58213			bol	43.5439	0.754564	0.310438	2.78083	0.0628704	0.21318
			beat-Ib	22.449	1.20044	1.06856	1.73282	0.197812	0.333131	1.45719			Oda	119.832	0.221615	0.23108	0.976091	0.368803	0.899517	0.228575			CG31221	141.064	0.462575	0.420038	1.17077	0.339358	0.92268	0.776946			CG12560	3.58168	1.9489	1.25868	1.36732	0.237149	0	2.07911			CG32052	27.5952	0.955085	0.458119	2.32138	0.0795889	0.140075
			mAChR-A	22.7345	0.718223	0.608903	1.93745	0.223622	0.516577	1.54289			Ca-alpha1D	8.8933	0.203387	0.652065	0.959665	0.216288	0.811081	0.255646			ATPsynC	224.95	0.176562	0.148438	1.3016	0.313985	0.939605	0.201063			bdl	38.1142	0.951466	0.452429	2.27159	0.165075	0.457289	2.01379			Rdh	30.3356	0.82128	0.337648	2.55577	0.0605095	0.238444
			pigs	26.4649	0.637287	0.370182	2.0768	0.190214	0.450891	1.58624			Chchd2	42.4223	0.225231	0.30197	0.74513	0.449347	0.934266	0.181715			CG13108	6.71109	0.520881	0.727598	0.671343	0.514269	0.768051	0.248579			mRpL30	4.92424	1.20784	0.886815	1.42499	0.248406	0	1.31667			side	41.1536	1.18647	0.568455	2.70195	0.0764362	0.146207
			CG14442	10.7374	0.454105	0.5443	0.870578	0.442671	0.542809	0.274033			jagn	4.47628	0.362809	0.854185	0.476072	0.606126	0.624061	0.143346			CaMKII	51.4785	0.228285	0.233287	1.13721	0.394151	0.90729	0.267836			CG10068	2.93142	1.3973	1.45396	1.05146	0.318812	0	0.824018			Mnn1	56.0561	0.708441	0.260155	2.87857	0.057637	0.202439
			Gug	21.4795	0.343429	0.394993	1.00082	0.40017	0.792498	0.258355			eag	7.39615	0.0670457	0.975839	0.786206	0.327404	0.745186	0.20818			Evi5	12.4144	0.389957	0.492881	0.815492	0.484249	0.921729	0.290201			Past1	12.7148	0.879754	0.725494	1.6403	0.258981	0.0054461	1.19798			CG42258	6.26187	1.43101	0.756496	2.08184	0.12369	0.0950514
			CG18467	7.19768	1.19863	0.817138	1.80539	0.189628	0.137659	2.50729			mRpS9	5.81474	0.363865	0.823556	0.461289	0.661879	0.624046	0.160477			Pka-C1	67.7898	0.284727	0.274131	0.991355	0.365392	0.978789	0.291576			Bka	1.30474	1.50045	1.58971	0.912795	0.36665	0	0.715582			SK	42.1071	0.952417	0.450305	2.55259	0.0688704	0.214471
			UbcE2H	4.05791	1.09945	0.972171	1.34235	0.301433	0.185671	1.33993			CBP	0.85073	1.56254	2.09961	0.990527	0.387047	0.311802	2.39122			sesB	308.535	0.173039	0.15167	1.30575	0.337466	0.913095	0.248245			agt	1.90391	1.24383	1.36407	0.931535	0.356863	0	0.573159			bel	38.722	0.76584	0.319284	2.65824	0.067138	0.24852
			cpx	285.612	0.21614	0.173608	1.5156	0.33381	0.676256	0.381552			vnd	0.0356734	0.0667395	0.129731	0.0321528	0.0379338	0.0624961	0.0144727			Mpcp2	71.1513	0.232696	0.230979	1.03608	0.356288	0.995074	0.217415			Idh3b	10.0462	0.833146	0.625472	1.44117	0.232235	0.624925	0.913384			side-VI	20.1531	1.08509	0.491415	2.35402	0.0723393	0.219459
			CG9005	18.4427	0.559677	0.423401	1.55874	0.272017	0.605279	0.850935			Scp2	28.0903	1.18958	1.18159	1.02565	0.289619	0.674437	1.58176			Frq2	3.50841	0.790195	1.08705	0.765608	0.377679	0.46074	0.440713			Rnmt	0.729707	1.65646	2.19385	0.864108	0.422647	0	0.817999			aus	32.1111	0.768953	0.337149	2.45678	0.0576137	0.2326
			brp	26.293	0.551836	0.416061	1.8057	0.243781	0.535283	0.980295			CG15891	5.75807	0.318919	0.691177	0.460479	0.55548	0.68492	0.145697			Snoo	4.21958	0.592384	0.769735	0.710691	0.442507	0.844881	0.507223			senju	0.849811	1.5364	1.79677	0.830909	0.417264	0	0.694249			capu	14.6504	1.09979	0.524181	2.41883	0.111074	0.103896
			CG12605	40.3355	0.279783	0.300209	0.975257	0.378001	0.844693	0.188384			eIF4A	94.1973	0.166455	0.203121	0.781451	0.366219	0.88697	0.163305			TyrRS	3.64885	0.52924	0.984861	0.565469	0.58481	0.691227	0.224052			Tsp42Ee	30.2461	0.662361	0.442686	1.94025	0.202501	0.592159	1.22673			CG17839	8.76394	1.36397	0.81112	2.10011	0.124675	0.104745
			Hsc70Cb	7.46468	0.840697	0.794195	1.25681	0.333339	0.253644	0.852995			mt:ND2	5.74937	0.755217	1.01819	0.873278	0.336365	0.576481	0.711512			TM4SF	60.2118	0.213224	0.223954	1.0165	0.40314	0.968956	0.202323			TfIIFalpha	1.44476	1.39126	1.55783	0.871375	0.389841	0	0.627449			pigs	26.1791	0.837851	0.376588	2.41982	0.0796017	0.275809
			Pdcd4	95.8037	0.243269	0.221815	1.18331	0.326059	0.822015	0.225707			NP15.6	17.5207	0.254165	0.442276	0.611743	0.532772	0.863316	0.243266			Pglym78	46.4006	0.236153	0.277416	0.932302	0.45776	0.95594	0.233903			mEFTu2	0.596264	1.55678	2.16786	0.739513	0.461796	0	0.523425			mei-P26	177.098	0.573586	0.18922	3.2371	0.042505	0.177848
			Nipped-A	8.85916	0.757557	0.635454	1.28857	0.273449	0.338311	0.794064			CG42762	0.0067861	0.0162869	0.220863	0.00460887	0.058826	0	0.000428521			CG7781	56.1469	0.193248	0.235957	0.916832	0.299435	0.998254	0.133405			ATPsynCF6	54.4812	0.525634	0.316074	1.97512	0.150408	0.579574	0.907992			E(Pc)	8.31445	1.15881	0.625134	2.00426	0.115897	0.157711
			Toll-6	20.98	0.808087	0.832201	1.33078	0.289616	0.542446	0.745831			CG13108	5.53466	0.218062	0.968933	0.509814	0.481446	0.624042	0.0882045			CG1090	10.1648	0.432415	0.850757	0.661263	0.526584	0.768107	0.260005			CG12171	7.06171	1.30217	0.87909	1.32581	0.232482	0.177718	1.39139			beat-IIa	40.6009	1.06929	0.617912	2.37129	0.0992896	0.230868
			Abl	26.3179	0.550686	0.356136	1.6418	0.237289	0.674178	0.845227			kuz	11.0676	0.583405	0.597727	1.06375	0.34767	0.869419	0.678066			CG17321	11.4585	0.331195	0.466731	0.693702	0.524042	0.998254	0.227235			LManII	7.11109	1.14389	1.17158	1.00836	0.319962	0.161415	0.573196			CadN	31.7483	0.814889	0.384276	2.30815	0.0782096	0.275421
			CG42450	64.225	0.408478	0.276373	1.89797	0.216796	0.545788	0.837197			ctrip	2.52818	0.321429	1.26412	0.255931	0.625896	0.499247	-0.0991301			CG42450	28.7995	0.246992	0.331319	0.770134	0.466436	0.998254	0.152899			Mfap1	0.76984	1.48185	2.12592	0.773789	0.459984	0	0.578403			Ptp36E	12.6839	1.03657	0.563971	1.97497	0.111825	0.180132
			mei-P26	173.857	0.307419	0.167515	2.11942	0.197797	0.486109	0.688326			f	0.10995	0.0137743	0.0795242	0.0108256	0.0539054	0.0624961	0.000884964			cue	2.15579	0.629622	1.15294	0.498791	0.592962	0.614457	0.349606			NP15.6	14.1575	0.703748	0.520254	1.57134	0.228301	0.610193	0.89949			GluClalpha	53.5914	0.70961	0.321664	2.444	0.0566012	0.236848
			Dscam2	59.9738	0.467274	0.263511	2.24539	0.154019	0.517755	1.46931			d	0.00522769	0.0162869	0.220863	0.00460887	0.058826	0	0.000428521			CanB	45.086	0.233513	0.254193	0.892629	0.443697	0.933351	0.236585			CG15525	1.18521	1.31417	1.70962	0.826268	0.424662	0	0.538961			futsch	262.188	0.610556	0.235938	2.64131	0.0349972	0.200007
			Ca-alpha1T	21.4339	0.386882	0.420987	0.881718	0.465331	0.7174	0.317659			asRNA:CR44182	0.00522769	0.0162869	0.220863	0.00460887	0.058826	0	0.000428521			Golgin245	2.17317	0.614434	1.26756	0.504004	0.601342	0.614457	0.347749			Ufd1	3.39862	1.05283	1.06712	0.98755	0.323375	0	0.515553			pyd	14.7762	1.04279	0.683366	2.13911	0.126906	0.170349
			CG15803	2.78183	0.927031	1.43168	0.754024	0.442522	0.185671	0.455701			lolal	20.064	0.147569	0.383845	0.551779	0.57231	0.972743	0.112573			Sh	85.4133	0.20557	0.222595	0.949348	0.388504	0.998254	0.199089			aay	49.7347	1.32618	0.531387	2.00647	0.165942	0.399032	2.93925			hppy	11.4084	1.09398	0.57213	2.15519	0.120802	0.138957
			fend	38.5389	0.500094	0.388919	1.60838	0.209438	0.614104	0.815189			asRNA:CR44228	0.00974792	0.0251502	0.220863	0.00711702	0.0568337	0.0624989	0.00103805			XNP	4.10544	0.424009	0.814576	0.49599	0.643357	0.768056	0.183731			CG14777	20.6869	0.786578	0.572263	1.64315	0.245837	0.578114	1.04964			GABA-B-R1	30.6119	0.732094	0.343381	2.31026	0.0891146	0.254453
			RpL10	105.032	0.199758	0.205131	1.10868	0.351556	0.761223	0.161888			CG42792	0.00537422	0.0251502	0.220863	0.00711702	0.0568337	0.0624989	0.00103805			Shal	9.17943	0.282009	0.529421	0.578204	0.534653	0.921729	0.118085			CG7834	25.1388	0.878095	0.698581	1.26251	0.214001	0.712911	0.614487			mtgo	33.3142	0.810577	0.328421	2.65537	0.106423	0.274462
			heph	99.4123	0.907616	0.567522	1.82256	0.242295	0.589972	1.74722			asRNA:CR44069	0.00881429	0.0122235	0.220387	0.00346647	0.0597356	0.0624961	0.000240154			CG32683	5.45128	0.809144	0.907468	0.904513	0.350153	0.723653	0.688665			Vamp7	3.64857	0.984486	1.03595	0.976919	0.33617	0	0.486997			eys	32.8888	1.33917	0.758643	2.41534	0.102305	0.217469
			unk	8.68391	0.652353	0.577656	1.17706	0.265872	0.34133	0.627429			asRNA:CR44201	0.00610112	0.0122235	0.220387	0.00346647	0.0597356	0.0624961	0.000240154			Syt7	33.2217	0.200974	0.28055	0.761053	0.501207	0.998254	0.139484			Dhfr	1.88154	1.69664	1.43029	1.09063	0.34412	0	1.56154			dco	7.80575	1.27942	0.721481	2.04999	0.154888	0.0882064
			e(r)	6.53097	0.704432	0.926441	0.988642	0.316481	0.248155	0.447997			lncRNA:CR44212	0	0	0	0	0	0	0			sns	1.16453	0.762198	1.78988	0.47841	0.511585	0.460673	0.265859			Cdk5	1.45669	1.57488	1.54411	0.940757	0.376057	0	0.982209			sno	35.8761	0.675447	0.312748	2.30181	0.0676564	0.264921
			onecut	12.4367	0.647471	0.538811	1.31584	0.300106	0.457732	0.741298			Lmx1a	1.51512	0.174757	0.357201	0.145314	0.143801	0.249956	0.042468			Chchd2	47.061	0.214019	0.281526	0.711148	0.439374	0.998254	0.119279			Coq3	0.732356	1.59633	2.12185	0.823392	0.440731	0	0.763199			Sin3A	11.7334	1.02227	0.519679	2.18514	0.142068	0.194124
			DopEcR	58.6508	0.354444	0.31362	1.65574	0.224701	0.594595	0.575235			lncRNA:CR44226	0	0	0	0	0	0	0			Cyp1	70.42	0.185024	0.226181	0.76728	0.467241	0.998254	0.111641			Pfrx	6.4766	1.29329	1.68428	0.796937	0.427017	0.2849	0.46688			Top1	21.7022	0.87082	0.404603	2.30027	0.0962224	0.261964
			Fife	22.9476	0.577551	0.597206	1.30475	0.29751	0.575758	0.555959			lncRNA:CR44231	0	0	0	0	0	0	0			dlg1	45.7677	0.181309	0.246527	0.735021	0.464165	0.986218	0.100215			CG18622	7.30582	1.21965	1.28624	0.94605	0.347078	0.27168	0.577105			Atg17	9.78851	1.0023	0.589834	1.85868	0.127243	0.172031
			CG33229	11.6201	0.577613	0.516352	1.18281	0.28084	0.462272	0.521065			CG44194	0	0	0	0	0	0	0			csw	12.4153	0.362252	0.485325	0.683524	0.554666	0.921729	0.318553			Spn88Ea	8.37215	0.924218	0.763226	1.16134	0.24917	0.502273	0.60887			cnn	22.3023	0.835137	0.404963	2.28744	0.10649	0.281142
			side-III	20.7876	0.766061	0.906377	1.28985	0.356101	0.512983	0.765823			pre-mod(mdg4)-T	0	0	0	0	0	0	0			lolal	21.957	0.203964	0.338867	0.68011	0.569644	0.998254	0.153528			CG7772	4.66403	1.14674	0.939711	1.13346	0.279304	0	0.805097			sws	6.09482	1.23343	0.744802	1.77551	0.15443	0.12729
			CG6770	104.521	0.388458	0.217077	1.87693	0.203203	0.675598	0.836147			lncRNA:CR44222	0	0	0	0	0	0	0			cpx	235.06	0.289041	0.175468	1.58489	0.214626	0.934738	0.452116			Vps37B	2.45484	1.29421	1.31035	0.955519	0.351353	0	0.681753			ttv	23.6366	0.848338	0.410702	2.16133	0.0863969	0.294558
			tty	7.19207	0.6755	0.676236	1.03921	0.359308	0.226063	0.510811			Mzt1	0	0	0	0	0	0	0			AcCoAS	10.5535	0.324591	0.64218	0.517936	0.627878	0.921406	0.145872			CG13367	1.09572	1.54409	1.79247	0.861967	0.425011	0	0.8089			rudhira	53.5056	0.610686	0.261083	2.49929	0.076009	0.256515
			Syn2	5.28204	0.794294	0.945046	0.875738	0.374956	0.248155	0.439397			Eno	75.7456	0.284563	0.252156	1.0991	0.356385	0.918169	0.355723			ctrip	2.89252	0.315361	1.06987	0.288282	0.590462	0.614457	-0.131964			mt:CoI	753.675	0.432459	0.322279	2.49241	0.181522	0.580649	1.18224			trn	18.3046	1.48224	0.927252	2.40123	0.1686	0.185756
			ps	196.412	0.177702	0.159865	1.32572	0.38181	0.66728	0.262798			pre-mod(mdg4)-Z	0	0	0	0	0	0	0			Snap25	42.4226	0.351643	0.269668	1.24865	0.30313	0.947221	0.434689			scf	29.9232	0.729511	0.657506	1.38909	0.255504	0.65045	0.685564			LRR	9.73665	0.974372	0.583634	1.8435	0.14528	0.15476
			Hex-A	45.5226	0.374786	0.30992	1.37413	0.281685	0.704375	0.476154			lncRNA:CR44196	0	0	0	0	0	0	0			Rab3	12.7225	0.447486	0.497614	0.988766	0.354325	0.91093	0.383178			Idh	22.6883	0.789823	0.603514	1.29576	0.197479	0.709452	0.576961			g	5.06337	1.42935	0.916299	1.6459	0.173496	0.0773546
			uex	45.6002	0.385007	0.277602	1.56023	0.278581	0.616337	0.704358			pre-mod(mdg4)-Y	0	0	0	0	0	0	0			His3.3B	8.6872	0.45007	0.548817	0.826761	0.425652	0.921406	0.265303			CG1888	1.2153	1.64229	1.83569	0.822212	0.420119	0	0.756468			norpA	46.8195	0.67717	0.291166	2.49545	0.0821559	0.281115
			larp	8.71693	0.702047	0.720657	1.39577	0.285598	0.312569	1.07747			asRNA:CR44192	0	0	0	0	0	0	0			CG31808	54.6035	0.495607	0.295202	1.7365	0.279708	0.700327	1.4568			mt:CoII	568.232	0.446141	0.317589	3.16456	0.19889	0.534028	2.28562			Nup153	7.62365	1.0457	0.654895	1.74543	0.14649	0.131631
			Syt1	134.67	0.267451	0.189643	1.7082	0.25919	0.586362	0.473678			lncRNA:CR42767	0	0	0	0	0	0	0			Ac3	6.72764	0.764207	0.685565	1.11804	0.265415	0.761315	1.05146			Tmem18	1.21168	1.6119	1.60381	0.954615	0.385871	0	1.04777			mmd	24.7057	0.76129	0.384948	2.14349	0.0956878	0.318013
			Hers	14.3778	0.365142	0.476978	0.800824	0.521698	0.587479	0.321969			lncRNA:CR44197	0	0	0	0	0	0	0			qvr	47.6656	0.137936	0.241893	0.672785	0.499536	0.998674	0.093395			CG8768	0.491098	1.55148	2.25518	0.691366	0.497428	0	0.538188			Trf2	24.5117	0.790352	0.401573	2.2249	0.116083	0.294008
			Su(dx)	1.69516	0.989425	1.51479	0.802195	0.489639	0.185671	0.634096			CG42830	0.00594568	0.0251502	0.220863	0.00711702	0.0568337	0.0624989	0.00103805			CG34423	2.33617	2.53917	2.07392	1.90841	0.333574	0.312082	12.6274			CG10353	0.881667	1.73309	1.96956	0.89017	0.411485	0	0.937728			CG13743	13.3203	1.21646	0.81883	2.17968	0.186668	0.100122
			CG2924	13.1238	0.537475	0.526292	1.174	0.343112	0.522191	0.531788			CG44227	0	0	0	0	0	0	0			siz	7.68643	0.461333	0.587747	0.836184	0.395039	0.998254	0.292786			CG8963	2.21947	1.28852	1.30273	0.996831	0.375273	0	0.846912			raskol	19.5333	0.809404	0.408795	2.12392	0.114016	0.279492
			ctp	327.088	0.228309	0.138775	1.95897	0.182863	0.579532	0.485956			lncRNA:CR44225	0	0	0	0	0	0	0			CanA-14F	15.0041	0.440795	0.438693	1.06232	0.354644	0.984876	0.470684			eIF1A	21.6023	0.584377	0.420572	1.61209	0.212404	0.614438	0.761168			RapGAP1	40.7041	0.790222	0.340429	2.43344	0.0918338	0.267798
			vib	28.0933	0.438206	0.36791	1.30826	0.329713	0.656109	0.530076			CG44198	0	0	0	0	0	0	0			psq	15.8666	0.535004	0.398544	1.21397	0.326536	0.874447	0.98446			CG10562	2.77737	1.13073	1.42196	1.043	0.393944	0	0.77076			Dhit	42.2551	0.658886	0.307335	2.22939	0.0758457	0.268968
			Shab	12.177	0.81104	0.976605	1.03087	0.38349	0.398768	0.586137			lncRNA:CR44191	0	0	0	0	0	0	0			NFAT	7.63725	0.528052	0.574187	0.871138	0.377596	0.998254	0.436285			CG34228	4.28091	0.949497	0.892729	1.03571	0.30785	0	0.536543			siz	15.1147	0.843883	0.463995	1.92782	0.122778	0.233087
			CG31688	11.5912	0.576319	0.553894	1.17393	0.331182	0.422374	0.59404			lncRNA:CR44185	0	0	0	0	0	0	0			para	47.4774	0.343899	0.253329	1.23663	0.305394	0.879036	0.551883			mRpS29	1.78853	1.31649	1.52185	0.949582	0.390365	0	0.738829			Smr	38.667	0.675448	0.303283	2.42222	0.106479	0.280417
			RpS14b	15.0451	0.508792	0.525922	1.1128	0.336462	0.563948	0.432639			Ir60f	0	0	0	0	0	0	0			CG42795	9.17717	0.580584	0.683869	0.730018	0.445061	0.921729	0.339957			CG17026	11.6724	1.13321	0.907897	1.32644	0.273523	0.375433	1.08578			cdc14	23.668	0.752766	0.382034	2.15445	0.11538	0.286204
			Asator	18.7434	0.46822	0.450911	1.27461	0.265849	0.634517	0.58214			lncRNA:CR44229	0	0	0	0	0	0	0			CG42750	19.8222	0.389027	0.374652	1.06024	0.339104	0.998254	0.435596			CG17746	1.59738	1.20646	1.62169	0.793102	0.438153	0	0.449573			side-V	9.02205	1.19669	0.915554	1.72784	0.1894	0.203917
			pico	18.8045	0.436746	0.413456	1.19931	0.347257	0.601252	0.465111			lncRNA:CR44190	0	0	0	0	0	0	0			Vha14-1	45.2527	0.138765	0.25954	0.548648	0.553335	0.998254	0.0760128			sesB	181.02	0.489162	0.248615	2.69143	0.16158	0.585955	2.10607			Nlg3	63.7471	0.614513	0.27807	2.26659	0.0664377	0.276349
			Ubr3	27.2328	0.409464	0.381369	1.23628	0.323023	0.773137	0.396592			His3.3B	7.72348	0.43264	0.617732	0.725166	0.411545	0.748643	0.308595			pyd	9.37622	0.823736	1.3117	0.951643	0.349064	0.835883	0.937779			HBS1	1.19157	1.36864	1.67562	0.947131	0.4055	0	0.883903			CG11000	50.1061	0.70108	0.300976	2.57129	0.121659	0.257955
			Bicra	12.0153	0.530933	0.513577	1.22777	0.340508	0.529269	0.660584			CG43110	0.00676043	0.0162869	0.220863	0.00460887	0.058826	0	0.000428521			PCB	1.49577	0.867644	1.57058	0.575112	0.496885	0.614457	0.401556			arx	0.609198	1.55785	2.51639	0.789284	0.478172	0	0.748564			osp	5.36563	1.35185	1.10776	1.50114	0.217652	0.141245
			Rim	89.1709	0.299188	0.223512	1.60089	0.255758	0.604527	0.514131			pre-mod(mdg4)-X	0	0	0	0	0	0	0			Atg17	4.1109	0.299308	0.763318	0.374263	0.625489	0.691259	0.153519			wol	2.60232	1.15919	1.25534	0.908855	0.37339	0	0.561905			CG46301	25.5738	1.11853	0.541322	2.47777	0.16099	0.0901099
			Mnn1	47.4443	0.380109	0.275055	1.49419	0.240276	0.668284	0.670464			lncRNA:CR44217	0	0	0	0	0	0	0			Eno	60.8932	0.300484	0.251668	1.09849	0.349824	0.986218	0.370639			CG30010	0.909559	1.72281	2.30462	0.898209	0.429089	0	1.11861			Hsp70Ab	5.49497	3.38134	1.7578	2.101	0.0828562	0.074784
			eys	23.6346	0.872021	0.973285	1.10141	0.360338	0.65739	0.723372			lncRNA:CR44216	0	0	0	0	0	0	0			kuz	10.9611	0.605501	0.579224	1.0144	0.354498	0.998254	0.661594			CG15706	1.86958	1.47062	1.43146	1.04122	0.372019	0	1.11467			CG31688	12.5853	0.898973	0.509777	1.91241	0.146088	0.251367
			p120ctn	63.1691	0.186562	0.246321	0.914606	0.446468	0.801751	0.128389			snoRNA:Or-CD9a	0	0	0	0	0	0	0			Dci	0.551797	0.842575	2.29865	0.387794	0.563762	0.537558	0.324427			nrv2	286.353	0.582968	0.646669	3.47662	0.27046	0.405851	3.78741			Plc21C	20.631	0.815162	0.479113	1.97215	0.140282	0.316245
			chrb	75.976	0.295859	0.233045	1.40236	0.24312	0.680083	0.320692			CG42798	0	0	0	0	0	0	0			lncRNA:CR45996	0.0394938	0.225073	0.561506	0.0601177	0.109253	0.0769004	0.0660532			santa-maria	13.139	1.51774	1.00992	1.24497	0.248627	0.544165	1.42757			CG42668	24.3182	0.713913	0.379194	2.02001	0.121865	0.35555
			Syx1A	191.408	0.232301	0.16439	1.7684	0.256304	0.596621	0.481145			CR42785	0	0	0	0	0	0	0			Gclc	2.62365	0.598424	1.07493	0.638002	0.556892	0.614457	0.353808			CG14687	69.7309	0.963519	0.93927	1.19347	0.33199	0.630791	0.88773			Tlk	36.2571	0.623483	0.312889	2.21949	0.106184	0.32819
			ph-p	2.4448	1.00914	1.28504	0.815782	0.434905	0.185671	0.658955			lncRNA:CR44233	0.0111734	0.0414371	0.441726	0.0117259	0.11566	0.0624989	0.00146657			Alg1	1.12933	1.00448	1.73641	0.578715	0.426394	0.537558	0.53788			Gabat	188.846	0.576721	0.461911	2.00408	0.233666	0.602741	1.0566			cdi	31.7813	0.759568	0.376472	2.1909	0.124094	0.321514
			CG17883	21.9784	0.244444	0.366381	0.743482	0.52682	0.811798	0.149952			srw	0	0	0	0	0	0	0			kek2	6.42789	0.531668	1.51818	0.571087	0.563897	0.691227	0.559879			VhaM9.7-b	32.3052	0.672458	0.542561	1.28035	0.20192	0.716044	0.451194			app	9.57496	1.15274	0.689081	1.83142	0.169561	0.240607
			Snx27	4.85015	0.670288	1.00005	0.969108	0.441982	0.185671	0.677165			snoRNA:Or-CD9b	0	0	0	0	0	0	0			AstC-R1	0.59931	0.79997	1.87411	0.372836	0.502048	0.460725	0.27168			ATPsyngamma	38.559	0.581602	0.415471	1.71976	0.239448	0.599823	0.927382			Pp2C1	10.1276	0.963641	0.538638	1.86006	0.155657	0.260083
			CG31998	12.0541	0.537952	0.499291	1.20376	0.38852	0.484582	0.688323			lncRNA:CR44199	0	0	0	0	0	0	0			lncRNA:CR42862	21.4164	0.368789	0.339671	1.15137	0.428715	0.897115	0.634449			CG1640	39.3376	0.70117	0.440411	1.5323	0.190935	0.536718	0.822671			Drep2	24.6754	0.668609	0.380312	1.93284	0.117504	0.348621
			pan	99.1488	0.275817	0.196167	1.56603	0.258097	0.682315	0.503384			lncRNA:CR44188	0	0	0	0	0	0	0			unk	4.74949	0.659056	0.742442	0.787479	0.435772	0.844881	0.739415			Daao1	1.86382	1.5137	1.71437	0.804426	0.428021	0	0.674707			Khc-73	12.4134	0.83116	0.555594	1.71812	0.164943	0.197591
			Galphao	50.1327	0.333843	0.278795	1.41315	0.231673	0.687345	0.501541			lncRNA:CR44200	0	0	0	0	0	0	0			Fas1	33.388	0.28393	0.296639	1.02142	0.396919	0.986218	0.349821			mt:ND2	10.5381	1.09783	0.750926	1.42587	0.268516	0.411915	1.42733			CG42450	58.4269	0.594849	0.270271	2.39407	0.102471	0.273037
			tapas	7.71394	0.612419	0.740217	0.987418	0.388353	0.213278	0.546753			lncRNA:CR44213	0	0	0	0	0	0	0			mei-P26	82.8138	0.0982282	0.197074	0.456079	0.650762	0.998254	0.0405726			Prosbeta4	5.17278	0.802705	0.857425	0.978019	0.333627	0	0.380516			Pgant9	9.79859	1.02316	0.814343	1.78193	0.182882	0.232089
			CG6700	22.233	0.439156	0.374296	1.11779	0.302613	0.813483	0.412098			CG44215	0	0	0	0	0	0	0			VAChT	19.5813	0.523991	0.850028	1.02517	0.390837	0.903929	0.64528			GIIIspla2	1.65359	1.25326	1.61841	0.813024	0.445196	0	0.601567			msi	61.9728	0.586947	0.250961	2.45203	0.0946446	0.284347
			fwd	7.68471	0.632177	0.74383	0.937693	0.418568	0.253475	0.500606			CG42782	0	0	0	0	0	0	0			Ypel	3.7363	0.575658	0.854023	0.637859	0.449236	0.768056	0.336118			SCOT	1.1777	1.46643	1.90051	0.898723	0.446036	0	0.948394			Amun	3.91686	1.32476	1.02061	1.36832	0.229476	0.0787801
			dpr6	32.0504	0.452935	0.497489	1.28112	0.262292	0.61432	0.499531			lncRNA:CR44187	0	0	0	0	0	0	0			bou	0.380689	1.25289	2.33896	0.603299	0.455756	0.384473	0.921786			Thor	2.86841	1.65455	1.55315	1.2753	0.399639	0	2.5232			CaMKII	99.159	0.502418	0.219185	2.55776	0.086906	0.285176
			GluClalpha	45.572	0.472435	0.418616	1.37632	0.290664	0.658374	0.907308			pre-mod(mdg4)-U	0	0	0	0	0	0	0			Pur-alpha	53.8042	0.265216	0.232404	1.15796	0.388391	0.907645	0.402196			euc	186.762	1.15297	0.862884	1.26566	0.208841	0.746119	0.858303			MEP-1	1.47968	1.73057	1.89245	1.14767	0.337822	0.0450859
			RNASEK	216.228	0.253075	0.166537	1.92474	0.291146	0.617636	0.757559			lncRNA:CR42790	0	0	0	0	0	0	0			lncRNA:CR44598	0.208331	0.28634	0.870201	0.13316	0.208713	0.0769217	0.0531527			CG17202	1.13756	1.3088	1.96384	0.713245	0.488817	0	0.444314			CG10011	10.9331	0.888317	0.544715	1.72911	0.160018	0.202887
			OtopLc	9.19237	0.538495	0.737304	0.992703	0.411486	0.464619	0.461408			pre-mod(mdg4)-AD	0	0	0	0	0	0	0			CG11000	27.2477	0.306953	0.345975	1.04435	0.35899	0.934738	0.384978			NLaz	2.57041	1.3273	1.34208	0.934953	0.394905	0	0.891142			trx	25.064	0.677096	0.361076	2.05115	0.133471	0.326127
			eag	18.2274	0.513497	0.70603	1.02167	0.344511	0.579792	0.35795			lncRNA:CR44209	0	0	0	0	0	0	0			lncRNA:CR45942	0.0132461	0.130994	0.293611	0.0343191	0.0504223	0.0769004	0.0240288			l(2)37Cc	2.7332	1.11621	1.18087	1.03059	0.388977	0	0.87464			lncRNA:CR31451	613.95	0.477765	0.184861	2.69854	0.0797969	0.232709
			Cirl	10.648	0.607519	0.613682	1.00018	0.375421	0.461616	0.574718			CR42786	0	0	0	0	0	0	0			Gdap2	17.087	0.330782	0.41922	0.856662	0.460683	0.998254	0.256593			fat-spondin	7.15469	0.965762	1.34412	0.910911	0.393249	0.28608	0.394718			fax	48.8697	0.672369	0.327296	2.38406	0.136995	0.312521
			CG9932	40.0351	0.517459	0.750563	1.06426	0.365682	0.613672	0.45592			lncRNA:CR44214	0	0	0	0	0	0	0			Cadps	25.1568	0.273038	0.31899	0.934773	0.386625	0.997936	0.250709			CG7637	1.19862	1.50636	1.75921	0.838126	0.437222	0	0.801194			smog	23.7601	0.692052	0.373689	2.06758	0.139978	0.377281
			GABA-B-R1	33.8922	0.370811	0.339188	1.39508	0.308829	0.662097	0.568177			CG42778	0	0	0	0	0	0	0			CG42258	2.9276	0.581765	0.934139	0.717614	0.533063	0.649574	0.548328			CG2767	2.77555	1.09068	1.26303	0.836825	0.404178	0	0.452541			eIF4G2	8.66561	0.969323	0.673503	1.53342	0.187037	0.183361
			PRL-1	3.1521	1.00617	1.44782	0.833623	0.509893	0.185671	0.838654			pre-mod(mdg4)-AE	0	0	0	0	0	0	0			RpL17	36.583	0.277942	0.297743	0.835091	0.378212	0.989594	0.221329			CG6330	1.0331	1.36768	2.19431	0.726874	0.49234	0	0.546319			NFAT	16.0804	0.822881	0.464371	1.98655	0.175264	0.251246
			Atpalpha	243.485	0.20124	0.155403	1.61373	0.21853	0.609798	0.319328			eIF4E3	0	0	0	0	0	0	0			CG9674	8.49083	0.64628	1.07108	0.711356	0.465179	0.768135	0.453605			Prps	10.7052	0.658003	0.600874	1.14464	0.269023	0.724954	0.40256			Frq2	15.5283	1.41183	0.732904	2.74381	0.123977	0.0708135
			CLIP-190	32.0646	0.34379	0.348115	1.20093	0.33833	0.6934	0.393815			lncRNA:CR44084	0	0	0	0	0	0	0			kdn	8.60136	0.388691	0.684626	0.64553	0.451057	0.768075	0.195311			CG6565	1.0989	1.44361	1.77988	0.777794	0.460286	0	0.705697			CG16711	18.2683	0.749078	0.430035	1.89155	0.141575	0.324631
			Lar	36.6648	0.346576	0.296278	1.32381	0.310516	0.670253	0.511442			Gr22c	0	0	0	0	0	0	0			lncRNA:roX2	83.9338	0.213207	0.210374	1.06042	0.305854	0.997936	0.244033			RPA3	1.12851	1.62676	1.81634	0.837227	0.445196	0	0.963347			mtd	75.501	0.521569	0.238471	2.31421	0.0781841	0.274816
			CR43361	0.158391	1.03503	1.75127	0.357011	0.302727	0.0624704	0.325788			asRNA:CR44207	0	0	0	0	0	0	0			lncRNA:CR44474	0.0528804	0.247957	1.39985	0.0694387	0.329994	0.230725	0.026092			CG8475	9.93213	0.869886	0.953757	0.930134	0.366334	0.268674	0.432106			Sema1a	54.4061	0.55863	0.272796	2.31589	0.107003	0.342541
			lncRNA:alphagamma-element:CR32865	58.4745	1.84132	0.877184	2.35281	0.201954	0.505702	6.45045			CG42779	0	0	0	0	0	0	0			Vha44	30.4152	0.262097	0.310199	0.779207	0.495717	0.998254	0.185265			vkg	13.5105	0.755808	0.845445	1.12085	0.347624	0.337592	0.529219			tei	35.3339	0.840742	0.465773	2.09947	0.151435	0.35222
			Tsp39D	6.00311	1.05272	0.866454	1.60074	0.274923	0.18585	1.77557			CG42781	0	0	0	0	0	0	0			Pfk	9.90318	0.401647	0.588948	0.702301	0.492039	0.768075	0.315935			Taf9	0.817854	1.4973	1.89973	0.77253	0.468784	0	0.74032			rdgB	17.3352	0.769485	0.450384	1.83199	0.143594	0.298324
			corn	14.268	0.445354	0.621358	1.02896	0.433402	0.444806	0.438751			lncRNA:CR44189	0	0	0	0	0	0	0			Rac1	8.08067	0.469857	0.622833	0.67214	0.487375	0.844881	0.330598			GstO2	1.62526	1.71429	1.54183	1.07719	0.382028	0	1.67332			CG13917	71.8165	0.515507	0.233975	2.38271	0.103423	0.280094
			psq	28.6759	0.368144	0.345532	1.16004	0.334816	0.744671	0.398429			lncRNA:CR43097	0	0	0	0	0	0	0			fwe	23.112	0.269665	0.346446	0.836037	0.416697	0.998254	0.245144			CG6707	7.77835	0.7179	0.720133	1.14661	0.322882	0.071113	0.511962			CG33303	11.9248	0.925457	0.541375	1.76158	0.157043	0.204162
			rl	29.0757	0.317652	0.350569	1.13565	0.3651	0.729013	0.361685			CG44142	0	0	0	0	0	0	0			sds22	2.7992	0.787752	1.10501	0.613746	0.535435	0.691227	0.624043			dbo	0.615957	1.47196	1.97531	0.748217	0.480084	0	0.648922			dally	24.1046	0.749003	0.442865	1.8422	0.150497	0.351676
			sd	23.2133	0.330383	0.386033	0.977901	0.390088	0.772336	0.28468			pre-mod(mdg4)-W	0	0	0	0	0	0	0			larp	4.72728	0.474562	0.781881	0.64336	0.521065	0.844881	0.344094			CG11110	1.44862	1.25649	1.59888	0.888767	0.451472	0	0.840909			klar	30.2935	0.741781	0.434614	1.89231	0.123725	0.312868
			Crtc	19.0634	0.414574	0.414736	1.11023	0.323843	0.692296	0.497018			asRNA:CR44071	0	0	0	0	0	0	0			Task6	6.04468	0.402069	0.671059	0.611677	0.509365	0.844881	0.256092			Pgd	2.75292	1.18926	1.18906	0.984077	0.393882	0	0.934853			Eip93F	14.7707	0.983191	0.551581	1.91666	0.17013	0.248135
			CG10543	17.9698	0.424457	0.408621	1.13749	0.390702	0.700618	0.55077			pre-mod(mdg4)-V	0	0	0	0	0	0	0			CG4957	2.3586	0.558876	1.22893	0.499862	0.576325	0.614457	0.263109			Elal	15.4893	0.978634	1.17468	1.32699	0.394285	0.0116846	0.824135			CG9932	19.0133	0.837991	0.523202	1.94755	0.169572	0.285428
			kek2	19.7165	0.769118	0.836976	1.84312	0.252097	0.400857	1.45179			CG42841	0	0	0	0	0	0	0			CG7990	16.9805	0.280403	0.407893	0.749922	0.445142	0.998254	0.190287			CG4598	7.25549	0.813093	0.965437	0.987529	0.379909	0.302981	0.468419			CG32432	15.9526	0.780801	0.432045	1.8573	0.149314	0.350117
			Prosap	42.2642	0.285765	0.313541	1.0291	0.344558	0.784583	0.215302			lncRNA:CR44166	0	0	0	0	0	0	0			dikar	5.41999	0.427	0.696826	0.613974	0.473824	0.844881	0.265352			blw	67.9862	0.487987	0.323577	1.76244	0.242314	0.595843	0.900363			tipE	17.0909	0.784832	0.486076	1.77652	0.159382	0.266285
			side-V	8.95104	1.00868	0.908051	1.52878	0.21756	0.295287	1.56226			asRNA:CR44144	0	0	0	0	0	0	0			ChAT	18.2863	0.248122	0.519689	0.523553	0.47498	0.844521	0.0978919			Grx1	16.1764	0.669147	0.537847	1.39602	0.305202	0.615807	0.745022			RhoGAP93B	22.1122	0.679186	0.385513	1.89866	0.140878	0.372092
			RhoGAP93B	20.6065	0.389279	0.39677	1.04288	0.416524	0.732828	0.420538			Ir56e	0	0	0	0	0	0	0			lncRNA:flam	0.00918559	0.0200454	0.271832	0.00567245	0.0724012	0	0.00052741			rgn	3.67566	1.03022	1.54515	0.764811	0.46997	0	0.392847			FucTA	4.59027	1.20055	1.0074	1.34209	0.254327	0.139226
			CG32767	40.1012	0.264335	0.303937	1.11106	0.372912	0.753189	0.288623			CG42807	0.00522769	0.0162869	0.220863	0.00460887	0.058826	0	0.000428521			nAChRalpha1	11.6873	0.330196	0.652344	0.792155	0.370213	0.831714	0.351378			Pgk	44.5943	0.63288	0.400452	1.5869	0.257537	0.545997	0.808739			Hrb27C	82.4014	0.504332	0.248279	2.21958	0.105589	0.29775
			Hs3st-A	42.6753	0.620278	0.40268	2.28149	0.188916	0.49173	1.98802			CR43100	0	0	0	0	0	0	0			Dph2	1.20036	0.779489	1.69897	0.451803	0.54278	0.537558	0.437327			CG9586	1.88693	1.22888	1.46614	0.785399	0.447441	0	0.555427			Hers	13.5773	0.72907	0.472126	1.59845	0.143607	0.315981
			Tob	54.0632	0.288567	0.267497	1.17508	0.353503	0.765452	0.334215			CG43098	0	0	0	0	0	0	0			Trf2	10.7204	0.319579	0.506959	0.665545	0.526517	0.998254	0.243226			CG9948	0.657826	1.43994	2.06985	0.676857	0.51671	0	0.569742			14-3-3zeta	407.963	0.393242	0.173733	2.32094	0.0443529	0.233841
			Hsp67Bc	43.8581	1.70209	1.61843	2.45561	0.309193	0.0956421	7.81892			lncRNA:CR44070	0	0	0	0	0	0	0			Grip75	1.42385	0.615463	1.68409	0.409024	0.656745	0.537558	0.183083			TrpRS-m	0.806931	1.45091	2.13204	0.637686	0.52837	0	0.469547			rin	35.512	0.589767	0.325026	1.94262	0.112939	0.357942
			nSyb	203.485	0.291447	0.161978	2.209	0.134728	0.536345	0.79384			lncRNA:CR44143	0	0	0	0	0	0	0			lncRNA:CR45939	0.0108484	0.0150443	0.271246	0.00426643	0.0735207	0.0769183	0.000295575			MED8	2.1589	1.0627	1.32743	0.768162	0.445331	0	0.410343			GluRIA	19.7951	1.10559	0.699611	1.98489	0.193172	0.283331
			CG13784	40.3885	0.279976	0.340939	1.0902	0.392272	0.778646	0.356771			CG42854	0	0	0	0	0	0	0			CG31751	5.40653	0.532925	0.85616	0.631711	0.439299	0.691227	0.35531			Gapdh2	140.567	0.480846	0.291522	1.71583	0.210043	0.542184	0.64246			tna	53.3269	0.588957	0.278156	2.19668	0.110963	0.324526
			Rdh	30.3412	0.425236	0.34212	1.48777	0.208084	0.654778	0.53798			lncRNA:CR44203	0	0	0	0	0	0	0			asRNA:CR46137	0.00859795	0.0992723	0.271832	0.0280921	0.0549972	0	0.0144656			CG7530	7.32106	0.809199	0.913497	0.880929	0.379025	0.272133	0.346294			Eip63E	44.7859	0.594858	0.300755	2.19126	0.131778	0.331392
			smash	6.55675	0.483432	0.740972	0.724161	0.531744	0.282636	0.307585			lncRNA:CR42794	0	0	0	0	0	0	0			gce	10.2755	0.267575	0.481461	0.55105	0.555114	0.998254	0.116046			CG6766	3.54202	0.898891	1.02	0.854203	0.395432	0	0.385496			emb	8.04538	0.88313	0.638437	1.53303	0.207087	0.184177
			sdt	56.7195	0.275498	0.27029	1.10746	0.363208	0.782644	0.340926			CR42842	0	0	0	0	0	0	0			UbcE2H	1.74179	0.71454	1.29021	0.565991	0.565543	0.614327	0.538049			sktl	1.13234	1.37596	1.77435	0.70903	0.488878	0	0.550356			Fim	49.4363	0.545692	0.284391	2.14913	0.119846	0.361702
			lap	18.8536	0.327984	0.440783	0.87705	0.419646	0.764843	0.261523			lncRNA:CR44204	0	0	0	0	0	0	0			pre-mod(mdg4)-N	0	0	0	0	0	0	0			Rpn3	2.81759	0.857062	1.11357	0.818951	0.427912	0	0.350011			Atpalpha	239.19	0.405187	0.192923	2.18886	0.065146	0.29887
			Corin	14.1262	0.694016	0.674357	1.30964	0.270809	0.441881	0.742934			asRNA:CR44168	0	0	0	0	0	0	0			asRNA:CR45960	0	0	0	0	0	0	0			Pex5	1.40493	1.27944	1.56002	0.756344	0.463677	0	0.546874			CG42594	10.6089	1.0814	0.745629	1.63246	0.211399	0.250625
			Rbp	21.1282	0.292925	0.408331	0.847851	0.366809	0.788583	0.174592			asRNA:CR44205	0	0	0	0	0	0	0			lncRNA:CR45997	0	0	0	0	0	0	0			ste14	0.677167	1.43476	2.2765	0.638459	0.537471	0	0.514173			tun	10.1682	0.898646	0.615428	1.78673	0.215674	0.150867
			CG1688	16.339	0.403287	0.839968	0.867854	0.494752	0.413724	0.354548			CG43101	0	0	0	0	0	0	0			lncRNA:CR45958	0	0	0	0	0	0	0			CG1635	1.1539	1.3084	1.79598	0.835984	0.47265	0	0.813728			sima	10.9224	0.831893	0.526607	1.73323	0.1945	0.254583
			l(1)G0469	7.02747	0.762123	0.758059	1.22495	0.313576	0.185674	1.19636			lncRNA:CR44073	0	0	0	0	0	0	0			lncRNA:CR46032	0	0	0	0	0	0	0			CG11426	4.14274	1.09623	1.5274	0.795621	0.437005	0	0.417696			Rgk1	12.9082	1.11745	0.837011	1.782	0.223942	0.157153
			Gprk1	57.2275	0.220495	0.238606	1.06322	0.415348	0.745384	0.22786			CG42853	0	0	0	0	0	0	0			asRNA:CR45995	0	0	0	0	0	0	0			CG18787	0.657602	1.27101	2.48764	0.595329	0.559306	0	0.327099			CG43736	25.8041	0.636524	0.36716	1.84262	0.145747	0.344438
			NaCP60E	57.9945	0.385506	0.315413	1.80518	0.250377	0.528937	0.82696			lncRNA:CR44145	0	0	0	0	0	0	0			Syx1A	110.221	0.164231	0.171091	1.00427	0.422718	0.998302	0.201126			Tsp42Ea	8.12518	1.35733	0.953063	1.51842	0.33785	0.0145135	1.85813			lbk	9.25144	0.86149	0.591591	1.67489	0.215884	0.122643
			Prp39	9.29752	0.339843	0.622493	0.650071	0.51805	0.394995	0.1539			lncRNA:CR44183	0	0	0	0	0	0	0			asRNA:CR46034	0	0	0	0	0	0	0			OstDelta	1.96083	1.14597	1.62634	0.764927	0.468465	0	0.510064			RSG7	33.3536	0.61019	0.33502	1.92304	0.124688	0.364436
			CG17698	24.638	0.325633	0.377334	0.844728	0.470609	0.847533	0.274262			CG43094	0	0	0	0	0	0	0			26-29-p	3.45499	0.55655	0.932636	0.518357	0.509661	0.691282	0.33878			mt:ND4	76.9721	0.629252	0.482379	2.35799	0.312646	0.444635	2.03372			lqf	33.4387	0.56947	0.342658	1.81484	0.143965	0.36108
			CG9586	3.18385	0.670788	1.16801	0.637428	0.56673	0.185671	0.804653			CR43096	0	0	0	0	0	0	0			asRNA:CR45955	0	0	0	0	0	0	0			B4	2.06809	0.975842	1.32367	0.728156	0.4674	0	0.332263			CG33298	8.05244	0.941894	0.660112	1.59416	0.220944	0.155056
			CG11122	16.1324	0.329194	0.437457	0.874232	0.501137	0.744034	0.399137			lncRNA:CR44202	0	0	0	0	0	0	0			lncRNA:CR45991	0	0	0	0	0	0	0			Tret1-1	31.5282	0.989631	1.51591	0.671397	0.503875	0.28608	0.294966			Bicra	12.5395	0.866552	0.525697	1.85714	0.20128	0.222643
			lncRNA:CR44024	14.9475	0.720964	1.09232	1.0225	0.408139	0.418461	0.740392			lncRNA:CR42791	0	0	0	0	0	0	0			lncRNA:CR45940	0	0	0	0	0	0	0			Vav	2.26394	0.933201	1.29469	0.762663	0.45506	0	0.348561			stai	121.514	0.459513	0.25159	2.10976	0.103734	0.296428
			CG30428	12.8253	0.543459	0.573249	1.01696	0.381237	0.491131	0.418745			lncRNA:CR44077	0	0	0	0	0	0	0			lncRNA:CR45956	0	0	0	0	0	0	0			ATPsynC	192.629	0.466132	0.294125	1.99206	0.273627	0.585023	1.07915			Abl	25.6539	0.670025	0.390897	1.81635	0.15942	0.409051
			AP-2mu	1.80645	0.978626	1.45497	0.742631	0.472752	0.123727	0.730445			CR44079	0	0	0	0	0	0	0			lncRNA:CR45945	0	0	0	0	0	0	0			Aef1	1.02438	1.07362	1.788	0.632037	0.532012	0	0.302362			CG3744	7.80763	0.992733	0.726105	1.54571	0.23288	0.11871
			Rbfox1	123.08	0.284626	0.19721	1.84925	0.21182	0.617284	0.635823			lncRNA:CR44078	0	0	0	0	0	0	0			lncRNA:CR45954	0	0	0	0	0	0	0			geminin	1.00319	1.28043	1.69881	0.691337	0.501444	0	0.500106			Ppcs	8.45577	0.921507	0.845807	1.48645	0.249073	0.158768
			Octalpha2R	21.4653	0.907521	0.729123	1.68667	0.284139	0.416352	2.15173			lncRNA:CR44184	0	0	0	0	0	0	0			lncRNA:CR45953	0	0	0	0	0	0	0			HIP-R	2.97165	1.10601	1.2011	1.03523	0.425596	0	1.10333			E2f1	14.6921	0.748656	0.53508	1.56752	0.179748	0.269501
			Mmp2	52.3711	0.483677	0.461229	1.69864	0.376474	0.463134	1.29186			asRNA:CR44083	0.00314782	0.0054276	0.220538	0.00153817	0.0612728	0.0624961	4.67425e-05			lncRNA:CR45950	0	0	0	0	0	0	0			Prestin	1.36216	1.16078	2.01869	0.616349	0.547666	0	0.355528			Nuak	16.6972	0.684019	0.46658	1.557	0.177121	0.337064
			Zyx	22.8831	0.402958	0.376437	1.18109	0.346997	0.625552	0.381652			lncRNA:CR44080	0	0	0	0	0	0	0			lncRNA:CR45957	0	0	0	0	0	0	0			Coa7	2.39065	0.968368	1.20793	0.80979	0.43569	0	0.432543			CrebB	1.81206	1.4466	1.52444	1.10291	0.351707	0.0450859
			CG14440	4.08481	0.742195	0.986249	0.9926	0.410332	0.186909	0.65383			asRNA:CR44065	0	0	0	0	0	0	0			CR45946	0	0	0	0	0	0	0			CG13373	1.35369	1.56625	1.67343	0.815076	0.456832	0	0.885335			Prosap	39.0662	0.540687	0.295229	1.90757	0.128182	0.394494
			fok	30.1991	0.433257	0.393793	1.19089	0.298723	0.68877	0.429519			lncRNA:CR44164	0	0	0	0	0	0	0			asRNA:CR46038	0	0	0	0	0	0	0			CG10795	1.49942	1.53089	1.57924	0.840903	0.456044	0	1.0329			Crtc	19.0449	0.623747	0.398796	1.6742	0.172602	0.415471
			Rab35	12.5536	0.571002	0.54844	1.19062	0.366454	0.533044	0.642361			lncRNA:CR42844	0	0	0	0	0	0	0			CR45947	0	0	0	0	0	0	0			CG8128	3.03976	0.931812	1.08088	0.874891	0.427388	0	0.518205			Met	16.7116	0.686069	0.423883	1.70795	0.182094	0.380228
			RpS18	65.1042	0.190325	0.252885	0.82676	0.411379	0.839864	0.123569			lncRNA:CR43104	0	0	0	0	0	0	0			lncRNA:CR45937	0	0	0	0	0	0	0			Pdk	35.4174	0.591129	0.418254	1.28049	0.231249	0.755536	0.512034			numb	10.7733	0.917131	0.793848	1.5464	0.243162	0.222902
			RpL26	88.9492	0.167059	0.21707	0.900255	0.431199	0.828884	0.124462			CG42852	0	0	0	0	0	0	0			Pss	0.633539	0.615522	2.06396	0.333501	0.663473	0.461373	0.200567			RpLP0	40.1423	0.412801	0.346546	1.32703	0.235727	0.660766	0.333331			CG14478	20.1906	0.604828	0.414452	1.63668	0.183291	0.422348
			Ca-Ma2d	10.7475	0.560041	0.923282	0.748335	0.489009	0.419969	0.629049			lncRNA:CR44081	0	0	0	0	0	0	0			RIOK2	1.05985	0.810056	1.75559	0.498554	0.631938	0.537558	0.525313			CG10311	15.1984	0.650016	0.827566	1.00314	0.366742	0.0974296	0.311844			UbcE2H	4.90912	1.84211	0.87004	2.29576	0.0975865	0.0489901
			Ih	120.525	0.267483	0.194456	1.61529	0.241549	0.62935	0.48308			Dlip2	1.21637	0.76753	1.77016	0.544875	0.582286	0.436766	0.337417			eIF3k	11.8443	0.282581	0.479436	0.587464	0.51168	0.921729	0.138825			Non1	21.5603	0.610342	0.53816	1.09523	0.280509	0.793782	0.36943			RhoGAP100F	15.8837	0.688233	0.482898	1.65048	0.211097	0.276838
			RhoGEF3	8.83567	0.561067	0.729543	0.958238	0.389407	0.365488	0.432532			CG42851	0	0	0	0	0	0	0			lncRNA:CR45959	0	0	0	0	0	0	0			asRNA:CR45131	4.68469	1.55658	2.04099	1.47077	0.360841	0.0757647	2.94562			upSET	12.338	0.714295	0.502043	1.58534	0.214662	0.30373
			Khc-73	13.2614	0.433116	0.60207	1.08997	0.321059	0.417145	0.452749			CR43105	0	0	0	0	0	0	0			lncRNA:CR45949	0	0	0	0	0	0	0			CG31436	0.838248	1.46192	2.2137	0.603446	0.55552	0	0.496684			Su(Tpl)	19.4496	0.647797	0.423719	1.60566	0.181905	0.435326
			lncRNA:CR43958	0.876894	1.05671	1.86496	0.582603	0.515858	0.123727	0.552126			lncRNA:CR44146	0	0	0	0	0	0	0			asRNA:CR45944	0	0	0	0	0	0	0			CtsB	19.3356	0.572928	0.527737	1.0797	0.297405	0.75172	0.359041			lncRNA:roX2	69.8556	0.582836	0.295811	2.036	0.156047	0.375151
			trx	23.9038	0.392891	0.367323	1.2096	0.275409	0.719393	0.460373			asRNA:CR44147	0	0	0	0	0	0	0			lncRNA:CR46021	0.00750907	0.0150443	0.271246	0.00426643	0.0735207	0.0769183	0.000295575			CG17597	1.04995	1.06698	1.63043	0.641126	0.523493	0	0.31863			CG4080	8.10762	0.993155	0.687244	1.76053	0.249903	0.134275
			CG9003	14.1364	0.428122	0.512241	1.08704	0.359171	0.520943	0.426703			asRNA:CR44160	0	0	0	0	0	0	0			CG6153	0.779454	0.771814	2.20042	0.344772	0.636504	0.537558	0.227829			l(3)neo43	1.72198	1.31075	1.5214	0.780954	0.467222	0	0.734448			ps	180.138	0.367881	0.175906	2.23439	0.0935679	0.316559
			MESR4	3.23578	0.739813	1.05008	0.960009	0.299717	0.185671	0.703903			CG43093	0	0	0	0	0	0	0			CR45948	0	0	0	0	0	0	0			CG11779	1.04733	1.32671	1.74825	0.73014	0.495681	0	0.65093			dpr9	44.6054	0.660718	0.345941	2.16517	0.174892	0.386259
			CG34423	0.518482	1.61901	0.768946	0.989706	0.0320984	0	3.18892			Prps	14.1415	0.238537	0.454033	0.475432	0.589911	0.94701	0.12807			lncRNA:CR45964	0	0	0	0	0	0	0			SP1029	5.47454	0.931944	0.915249	0.97544	0.398174	0.193136	0.73831			Gbs-76A	5.52518	0.934481	0.744988	1.3851	0.26678	0.0875438
			beat-Ia	13.7651	0.74511	0.936792	0.862896	0.40798	0.514823	0.618164			ppk18	0	0	0	0	0	0	0			lncRNA:CR45935	0	0	0	0	0	0	0			mt:srRNA	1.6883	1.57739	1.50876	1.08214	0.420552	0	1.63374			nAChRbeta1	88.591	0.4492	0.240812	1.90563	0.11254	0.354922
			aop	12.6475	0.563767	0.703461	1.03741	0.314783	0.54888	0.472729			FDY	0	0	0	0	0	0	0			lncRNA:CR45963	0	0	0	0	0	0	0			CG9344	1.88547	1.15938	1.47939	0.718033	0.483136	0	0.470412			Ptp10D	8.41379	0.884401	0.912534	1.47361	0.28	0.171756
			Mef2	16.942	0.376253	0.578609	1.01708	0.247719	0.478454	0.319373			sro	0	0	0	0	0	0	0			lncRNA:CR45993	0	0	0	0	0	0	0			CG12355	78.5869	0.514577	0.461778	1.52461	0.32403	0.60252	0.620252			crol	31.9888	0.552167	0.328706	1.75333	0.154277	0.395376
			Ssdp	50.0864	0.197013	0.260596	0.810697	0.511119	0.850135	0.162211			lncRNA:CR44148	0	0	0	0	0	0	0			dco	3.67923	0.50724	0.937469	0.570754	0.477224	0.768056	0.312058			CG6356	6.89278	2.12551	1.45227	1.16274	0.379429	0.325042	2.28296			CG5151	14.3951	0.654838	0.455608	1.52314	0.207364	0.413053
			mub	59.9751	0.185001	0.286461	0.851859	0.472005	0.798455	0.185043			siz	7.72613	0.433356	0.608059	0.689461	0.366416	0.885018	0.243415			pre-mod(mdg4)-O	0	0	0	0	0	0	0			CG13295	1.05724	1.2725	2.22213	0.679884	0.541758	0	0.510677			NaCP60E	58.3939	0.473173	0.267594	1.90667	0.161257	0.363712
			side-VI	18.7852	0.624529	0.623434	1.09095	0.406121	0.642133	0.71188			bou	0.667363	1.33735	2.19553	0.657347	0.457329	0.312384	1.04538			lncRNA:CR45936	0	0	0	0	0	0	0			hoe1	26.1539	0.649403	0.759268	1.04048	0.310917	0.472793	0.292603			5-HT7	4.18081	1.10433	1.3878	1.2378	0.338768	0.0903056
			Rbp6	289.175	0.227165	0.234166	1.67914	0.30477	0.573877	0.479099			lncRNA:CR42850	0	0	0	0	0	0	0			CG1275	3.3066	0.416071	1.39631	0.530757	0.593879	0.691282	0.202481			wkd	5.49547	0.688435	0.864092	0.850761	0.406888	0	0.279318			RpL39	146.271	0.394921	0.217981	1.92256	0.11208	0.360706
			CG14864	2.60062	0.923614	1.54269	0.847944	0.44443	0.185671	0.746148			asRNA:CR44062	0	0	0	0	0	0	0			CR45933	0	0	0	0	0	0	0			GCS2beta	2.44854	1.25882	1.28755	0.861238	0.435547	0	0.808308			inaE	33.1923	0.549418	0.336861	1.73602	0.180527	0.424024
			CanA-14F	28.733	0.387139	0.390974	1.39687	0.254138	0.527886	0.705061			asRNA:CR44064	0	0	0	0	0	0	0			lncRNA:CR46039	0	0	0	0	0	0	0			RpS11	110.159	0.386602	0.304516	1.37217	0.182048	0.7029	0.285261			CG40472	9.60874	1.21117	1.02035	1.28978	0.306696	0.263159
			Gprk2	15.1468	0.602548	0.740661	1.02329	0.383449	0.516135	0.498465			lncRNA:CR44161	0	0	0	0	0	0	0			GATAd	3.18688	0.37915	0.926191	0.42847	0.557737	0.691227	0.124819			CG2685	0.639824	1.23019	2.62057	0.592804	0.578315	0	0.384168			Glut1	13.6043	0.668612	0.534941	1.45128	0.235707	0.317361
			vas	0.298335	1.60688	1.76846	0.670245	0.245428	0	0.888688			CG44163	0	0	0	0	0	0	0			CR45934	0	0	0	0	0	0	0			Cys	104.693	0.627166	0.765667	0.999951	0.345872	0.771499	0.31979			CG31998	12.159	0.70985	0.515423	1.52933	0.23159	0.274825
			eIF3k	18.2742	0.45474	0.460548	1.06709	0.261324	0.711491	0.475538			CR42838	0	0	0	0	0	0	0			rdgC	7.02291	0.288234	1.0949	0.578444	0.525921	0.844904	0.201535			ReepB	13.6187	0.889701	0.586026	1.27244	0.325595	0.777008	1.00285			PIG-T	7.30441	0.970798	0.7213	1.44351	0.266555	0.15856
			CG42392	75.6576	0.295118	0.237807	1.44779	0.233646	0.628781	0.471779			lncRNA:CR45967	0.00746329	0.0162869	0.220863	0.00460887	0.058826	0	0.000428521			lncRNA:CR46040	0	0	0	0	0	0	0			CG33494	0.804915	1.75207	2.66314	0.897301	0.490888	0	1.55025			nolo	12.4377	1.17326	0.812975	1.79322	0.190762	0.171891
			CG17141	1.94265	0.769173	1.59105	0.636989	0.514405	0.185671	0.354729			asRNA:CR44063	0	0	0	0	0	0	0			CG6700	12.4395	0.249832	0.428505	0.641539	0.445687	0.986218	0.165754			Mccc1	0.906554	1.20603	1.84845	0.749555	0.495968	0	0.586205			Ubr3	28.1141	0.548384	0.366238	1.60258	0.181028	0.415323
			Hrb27C	80.8152	0.154139	0.234782	0.77013	0.471283	0.835856	0.117837			CG43106	0	0	0	0	0	0	0			lncRNA:CR46009	0.00387424	0.00668012	0.271431	0.00189314	0.0754127	0.0769183	5.75292e-05			Nep3	1.87766	0.931897	1.59628	0.777893	0.494243	0	0.443936			tara	4.66351	1.00866	0.805164	1.29041	0.287011	0.0897814
			RpL36A	67.4812	0.155886	0.234841	0.810198	0.485771	0.853681	0.121807			cpx	191.873	-0.0191952	0.436033	1.20424	0.269197	0.785122	-0.0448044			Rdh	12.9736	0.293652	0.443394	0.60728	0.533974	0.998254	0.166528			Trap1	2.28915	0.832004	1.18386	0.737495	0.477327	0	0.323415			CG44422	26.6376	1.13941	0.660243	2.83695	0.0947852	0.128866
			mmd	24.9033	0.361018	0.373323	1.12432	0.351651	0.74504	0.414854			CG43108	0	0	0	0	0	0	0			ttv	11.9537	0.302118	0.503857	0.721929	0.533806	0.998254	0.302522			Polr2G	2.15921	1.35033	1.53822	0.73777	0.484395	0	0.667762			CG2924	13.3103	0.729948	0.492857	1.62343	0.22827	0.323499
			crol	34.363	0.318232	0.310975	1.25591	0.373118	0.681395	0.408684			mir-iab-8	0.00522769	0.0162869	0.220863	0.00460887	0.058826	0	0.000428521			pre-mod(mdg4)-AA	0	0	0	0	0	0	0			Cyp6a13	2.42013	1.59729	1.57941	0.941657	0.444693	0	1.54308			Dyrk3	40.6262	0.477964	0.290202	1.81159	0.18464	0.416862
			bun	91.3296	0.272212	0.207399	1.42027	0.285672	0.727976	0.399262			CG43111	0	0	0	0	0	0	0			Tob	26.8531	0.238285	0.31466	0.710744	0.525952	0.998254	0.189548			CG3939	1.12635	1.78572	2.14435	0.919793	0.441742	0	1.38462			mam	8.13342	1.13111	0.698106	1.80543	0.152539	0.0798457
			Frq2	10.0113	0.606588	1.06199	0.801986	0.425407	0.41968	0.467093			CG42837	0	0	0	0	0	0	0			lncRNA:CR45983	0	0	0	0	0	0	0			CG8199	1.70408	1.17709	1.49272	0.709315	0.500078	0	0.521188			cic	21.7233	0.587214	0.414607	1.62215	0.229239	0.384784
			ctrip	5.24506	0.594722	0.966756	0.920845	0.412129	0.185671	0.561049			CG43091	0	0	0	0	0	0	0			lncRNA:CR46028	0	0	0	0	0	0	0			Dyro	0.946258	1.28248	2.35888	0.793705	0.480555	0	0.728099			CG31221	345.874	1.06376	0.426433	3.42469	0.0591663	0.14904
			norpA	46.1536	0.310599	0.309468	1.26281	0.262349	0.671567	0.391834			CG42808	0	0	0	0	0	0	0			lncRNA:CR45975	0	0	0	0	0	0	0			Plod	2.75227	0.849967	1.35564	0.726619	0.482925	0	0.292269			unc-104	43.7011	0.503104	0.341003	1.65431	0.21516	0.441149
			Gbs-76A	3.89071	0.638332	1.1746	0.670468	0.448729	0.185671	0.30569			lncRNA:CR44172	0	0	0	0	0	0	0			lncRNA:CR45976	0	0	0	0	0	0	0			rngo	0.922935	1.41353	2.06717	0.738915	0.499087	0	0.711964			tty	8.11626	1.18145	0.648778	2.03526	0.132494	0.112688
			dpr11	11.1582	0.550041	1.20371	0.951536	0.479332	0.41482	0.462784			CG43109	0	0	0	0	0	0	0			lncRNA:CR46002	0	0	0	0	0	0	0			ND-B14	26.035	0.472379	0.383296	1.3558	0.287968	0.659566	0.49985			CG42795	14.9163	0.652477	0.49221	1.52337	0.264338	0.306575
			fne	209.267	0.19927	0.173284	1.3065	0.302003	0.707123	0.223023			lncRNA:CR44076	0	0	0	0	0	0	0			lncRNA:CR45984	0	0	0	0	0	0	0			CG3397	0.397631	1.31726	2.83642	0.603879	0.569973	0	0.456898			nocte	16.7096	1.04711	0.491599	2.40484	0.0953421	0.131749
			lncRNA:CR45010	0.0527411	0.461297	1.11934	0.1301	0.211783	0.0624704	0.0794157			lncRNA:CR42839	0	0	0	0	0	0	0			knon	0.00387424	0.00668012	0.271431	0.00189314	0.0754127	0.0769183	5.75292e-05			CG30285	49.8197	0.663829	0.599165	1.26672	0.308573	0.697878	0.640845			lgs	25.2247	0.533537	0.366593	1.55955	0.211722	0.475854
			RpL15	165.892	0.235551	0.175614	1.66047	0.240779	0.620873	0.598954			lncRNA:CR44075	0	0	0	0	0	0	0			lncRNA:CR45982	0	0	0	0	0	0	0			QIL1	18.2406	0.541591	0.551109	1.13959	0.355208	0.655447	0.43254			Imp	36.4434	1.06629	0.754323	1.80799	0.240812	0.271599
			kis	15.7235	0.443676	0.493805	0.963027	0.446025	0.519271	0.423931			Np	0	0	0	0	0	0	0			lncRNA:CR45973	0	0	0	0	0	0	0			bou	1.90961	1.70333	1.57402	0.891553	0.464145	0	1.58095			Rim	83.459	0.393077	0.234546	1.76673	0.160289	0.408616
			Gfrl	23.7521	0.600717	0.449163	1.44906	0.253105	0.620693	3.2375			CG43090	0	0	0	0	0	0	0			lncRNA:CR46001	0	0	0	0	0	0	0			sordd1	9.68357	0.598702	0.639922	1.04684	0.370416	0.678615	0.425245			RhoGAP19D	26.8463	0.521597	0.35441	1.60755	0.224048	0.468861
			sfl	6.37326	0.477473	0.916077	0.897947	0.361829	0.310531	0.438227			lncRNA:CR44156	0	0	0	0	0	0	0			asRNA:CR45974	0	0	0	0	0	0	0			TyrRS	2.05402	1.145	1.30927	0.938015	0.440589	0	0.932595			ctp	275.92	0.331874	0.168721	2.0938	0.156747	0.347427
			kek6	5.86677	0.618516	0.764396	0.725767	0.473463	0.185671	0.417873			asRNA:CR44155	0	0	0	0	0	0	0			lncRNA:CR46000	0	0	0	0	0	0	0			CG8389	1.57642	0.966154	1.60416	0.727991	0.496138	0	0.391606			CG12851	6.71258	0.842041	0.749184	1.34923	0.317455	0.124786
			hep	10.411	0.424181	0.623672	0.84792	0.485389	0.525226	0.332778			CG43088	0	0	0	0	0	0	0			e(r)	3.02827	0.475239	1.11568	0.482331	0.472519	0.691287	0.216435			Lamtor5	2.73308	0.799922	1.05206	0.751884	0.458444	0	0.299499			Rbp	19.5413	0.561024	0.418249	1.4862	0.237418	0.421756
			wdb	47.3433	0.248139	0.280017	1.14503	0.306423	0.719362	0.284917			lncRNA:CR44041	0	0	0	0	0	0	0			lncRNA:CR45977	0	0	0	0	0	0	0			Snr1	2.23904	0.979819	1.22095	0.761802	0.465249	0	0.452661			Ca-alpha1D	20.2199	0.821108	0.411366	2.19279	0.102251	0.272292
			lncRNA:CR43334	5.59918	0.899656	1.47271	0.921408	0.366057	0.244475	0.960859			lncRNA:CR42858	0	0	0	0	0	0	0			lncRNA:CR46007	0	0	0	0	0	0	0			lncRNA:CR45251	2.42476	0.867131	1.34805	0.816118	0.465849	0	0.472862			unc-13-4A	26.0971	0.998449	0.627903	2.09942	0.13792	0.206151
			mt:ATPase6	801.585	0.181364	0.16083	1.63251	0.202388	0.517442	0.431147			CG43055	0.00881429	0.0122235	0.220387	0.00346647	0.0597356	0.0624961	0.000240154			pre-mod(mdg4)-G	0	0	0	0	0	0	0			Gel	20.7857	1.39904	0.986829	1.03314	0.366183	0.282454	1.30391			Ih	120.657	0.369833	0.207379	1.93455	0.175024	0.38129
			EndoA	17.7545	0.348019	0.469643	1.15148	0.350076	0.575455	0.509791			Srp54	3.73196	0.37517	0.854071	0.36927	0.639855	0.686466	0.242487			lncRNA:CR45978	0	0	0	0	0	0	0			CG6040	31.2553	0.665105	1.05506	1.05755	0.349146	0.446666	0.368477			beat-Ib	29.6978	1.14392	0.714084	2.56992	0.158297	0.139895
			14-3-3zeta	416.782	0.167057	0.143116	1.47422	0.249622	0.667058	0.278991			lncRNA:CR44034	0	0	0	0	0	0	0			lncRNA:CR45981	0	0	0	0	0	0	0			Pgant7	0.526826	1.17297	2.12982	0.534994	0.594882	0	0.290723			CG9003	14.2574	0.580664	0.460537	1.33136	0.263104	0.447517
			CG34195	0.336319	1.21655	1.45919	0.588106	0.26631	0.185671	0.893044			CG43089	0	0	0	0	0	0	0			lncRNA:CR45980	0	0	0	0	0	0	0			Rab11	9.6528	0.739976	0.610003	1.27888	0.360375	0.660476	0.894129			RpL41	108.75	0.389623	0.23291	1.91913	0.201636	0.398591
			Trf4-1	3.82859	0.667788	1.09015	0.68135	0.551293	0.185671	0.448017			lncRNA:CR43130	0	0	0	0	0	0	0			pre-mod(mdg4)-H	0	0	0	0	0	0	0			Jafrac1	29.1916	0.524301	0.512368	1.03347	0.305733	0.788831	0.277677			kek2	18.9243	1.11738	0.854445	2.43623	0.155347	0.166909
			lncRNA:CR45758	5.90252	0.914455	1.09224	1.10654	0.325288	0.248046	0.881656			lncRNA:CR44033	0	0	0	0	0	0	0			lncRNA:CR45998	0	0	0	0	0	0	0			CG34417	9.94412	1.00328	1.82397	0.772637	0.511393	0.299607	0.569506			UQCR-6.4	94.0134	0.405805	0.26424	1.60745	0.183689	0.463882
			fray	1.93247	0.634094	1.52815	0.59717	0.497462	0.185671	0.299663			lncRNA:CR44082	0	0	0	0	0	0	0			asRNA:CR46133	0.00731776	0.0309541	0.271832	0.00875941	0.0699492	0.0769217	0.0012776			Not11	1.49609	1.22022	1.68684	0.779168	0.488333	0	0.650109			tow	35.9152	0.438296	0.319262	1.52067	0.220134	0.480996
			UBL3	11.1541	0.39004	0.603613	0.929852	0.350699	0.415178	0.503651			CG43131	0	0	0	0	0	0	0			lncRNA:CR46041	0	0	0	0	0	0	0			Ugt317A1	4.54609	0.943006	1.34489	0.789063	0.463189	0	0.475148			Nlg2	32.5143	0.767585	0.355301	2.32073	0.0811171	0.252817
			RpS20	97.7629	0.137659	0.214256	0.740464	0.501808	0.829912	0.116206			lncRNA:CR44173	0	0	0	0	0	0	0			veli	13.0696	0.300156	0.478383	0.64568	0.468338	0.921729	0.244528			Alg2	1.66279	1.37298	1.56649	0.87485	0.455441	0	1.06824			SelR	11.9741	0.650529	0.54593	1.23178	0.281534	0.350618
			Vps11	4.7577	0.439514	0.853809	0.652887	0.500711	0.185671	0.229163			CG44037	0	0	0	0	0	0	0			enc	8.59582	0.343747	0.592347	0.517504	0.591049	0.844881	0.183211			CG13124	12.436	0.666543	0.600771	0.987973	0.340289	0.5482	0.424008			CG33774	6.61637	0.849802	0.809421	1.28196	0.345773	0.15506
			hang	4.86025	0.567226	1.01296	0.75395	0.524605	0.185826	0.456652			lncRNA:CR44036	0	0	0	0	0	0	0			CG46042	0	0	0	0	0	0	0			daed	0.669911	1.36705	2.39068	0.712677	0.516244	0	0.69076			swm	9.21688	0.658438	0.577368	1.21789	0.298818	0.33162
			dikar	9.9178	0.436772	0.573161	0.868506	0.359998	0.493455	0.429456			CG42825	0	0	0	0	0	0	0			lncRNA:CR46010	0	0	0	0	0	0	0			pita	0.819347	1.25841	2.0111	0.627426	0.552927	0	0.475578			Hsp83	80.1539	0.742734	0.416462	1.97496	0.108962	0.33008
			NfI	8.973	0.457699	0.610814	0.859884	0.425968	0.387597	0.474363			CheA46a	0	0	0	0	0	0	0			asRNA:CR46139	0.00832053	0.0200454	0.271832	0.00567245	0.0724012	0	0.00052741			CG17168	1.40898	1.16828	1.55322	0.80951	0.482515	0	0.712479			KrT95D	22.2464	0.512773	0.388713	1.4576	0.274821	0.520805
			RpS26	99.4881	0.215923	0.202389	1.15678	0.320446	0.777527	0.242417			lncRNA:CR44061	0	0	0	0	0	0	0			asRNA:CR46044	0	0	0	0	0	0	0			grsm	2.1637	0.955461	1.22912	0.73196	0.481052	0	0.415948			cpo	86.5963	0.40177	0.240572	1.71649	0.199656	0.449109
			eff	79.5834	0.116524	0.221471	0.616778	0.506329	0.874392	0.0683672			lncRNA:CR42859	0	0	0	0	0	0	0			asRNA:CR46045	0	0	0	0	0	0	0			CG7461	5.63811	0.745363	0.84851	0.932888	0.420061	0	0.495069			18w	2.83039	1.37097	1.35431	1.36549	0.255689	0.00978762
			CG42594	17.8357	0.751466	0.783975	0.767	0.452345	0.512148	0.588963			CG44038	0	0	0	0	0	0	0			lncRNA:CR46046	0	0	0	0	0	0	0			orion	13.3231	0.647028	0.590265	1.10759	0.367386	0.665542	0.525157			nAChRalpha1	23.0758	0.844027	0.564709	2.27987	0.109014	0.227044
			Sdc	84.8087	0.205096	0.225853	1.13476	0.36351	0.711026	0.272665			CheA56a	0	0	0	0	0	0	0			asRNA:CR46047	0	0	0	0	0	0	0			eIF6	1.43612	1.22897	2.13864	0.621532	0.55783	0	0.492556			Corin	23.3344	0.961584	0.464705	2.52096	0.129812	0.234252
			CG12851	5.67164	0.526729	0.900189	0.768608	0.494353	0.233153	0.463981			lncRNA:CR44039	0	0	0	0	0	0	0			lncRNA:CR46043	0	0	0	0	0	0	0			CG6465	13.5419	1.28309	1.50512	0.896151	0.451605	0.417736	0.648308			Svil	3.02522	1.18298	1.14429	1.19354	0.292535	0.0336762
			CG31191	1.83163	0.819697	1.75599	0.717757	0.523477	0.185671	0.675362			Gclc	3.58861	0.576182	1.01567	0.585711	0.508281	0.585239	0.337218			lncRNA:CR46056	0	0	0	0	0	0	0			CG1129	0.832319	0.992608	1.80711	0.598928	0.567225	0	0.322222			ND-AGGG	45.4741	0.683546	0.310713	2.33877	0.108484	0.266699
			syd	2.86267	0.614279	1.3379	0.483999	0.630873	0.185671	0.209256			CG43127	0	0	0	0	0	0	0			lncRNA:CR46030	0	0	0	0	0	0	0			CG4646	2.69843	0.730174	1.05611	0.706364	0.485149	0	0.240294			hang	6.47465	1.25996	0.740651	1.82427	0.180414	0.111307
			Epac	7.88123	0.657666	1.02847	0.777998	0.422023	0.228443	0.664806			CG43125	0	0	0	0	0	0	0			lncRNA:CR46011	0	0	0	0	0	0	0			MSBP	18.0897	0.576	0.604811	0.925165	0.355884	0.811262	0.270717			nAChRalpha3	29.8892	0.654567	0.495664	1.44483	0.273091	0.402098
			pho	24.2377	0.280077	0.379252	0.85819	0.379444	0.788964	0.219633			CG43124	0	0	0	0	0	0	0			lncRNA:CR46031	0	0	0	0	0	0	0			psidin	0.65571	1.08126	2.29299	0.500368	0.621941	0	0.246638			wrd	6.42836	1.20081	0.76042	1.70577	0.166179	0.112099
			cwo	6.69382	0.568559	0.757256	0.78017	0.490406	0.185671	0.584944			mt:ND3	6.5663	0.582805	0.780376	0.834161	0.419282	0.66129	0.65596			lncRNA:CR46057	0	0	0	0	0	0	0			lncRNA:CR43411	1.87234	0.989846	2.32299	0.642661	0.563359	0	0.308819			larp	9.3414	1.04303	0.619932	1.89564	0.173602	0.0919117
			clu	3.09605	0.612186	0.995038	0.724752	0.423518	0.124414	0.378422			asRNA:CR44045	0	0	0	0	0	0	0			asRNA:CR46049	0	0	0	0	0	0	0			Kr-h2	12.2134	0.740907	0.663458	0.989698	0.391648	0.831203	0.570683			pasha	3.16869	1.66596	1.17128	1.74422	0.163204	0.048078
			CG1275	9.29911	0.590845	0.99052	0.968093	0.306455	0.408049	0.508405			CG43123	0	0	0	0	0	0	0			asRNA:CR46050	0	0	0	0	0	0	0			Timp	33.7222	0.659106	0.811497	0.874897	0.388428	0.784315	0.259165			heph	78.9203	1.05344	0.452162	2.58321	0.0836491	0.229543
			CG13893	2.333	0.627332	1.64911	0.434095	0.502476	0.185671	0.0875871			CG42815	0	0	0	0	0	0	0			lncRNA:CR45967	0.00918559	0.0200454	0.271832	0.00567245	0.0724012	0	0.00052741			COX8	63.7203	0.352126	0.304754	1.33692	0.284071	0.628456	0.324296			Nlg4	14.953	0.822191	0.483137	1.90009	0.135272	0.235388
			CG12531	11.7411	0.363547	0.692672	0.856817	0.437694	0.404982	0.399303			CG42814	0	0	0	0	0	0	0			asRNA:CR46054	0	0	0	0	0	0	0			Lamtor4	4.36586	1.2267	1.03898	0.936067	0.428939	0	1.07137			Dys	4.08913	1.42291	1.11634	1.47104	0.209815	0.132882
			CG45263	59.2171	0.518653	0.736705	0.97349	0.429298	0.66853	0.525065			CG42827	0	0	0	0	0	0	0			lncRNA:CR46053	0	0	0	0	0	0	0			CG2608	1.28662	1.23336	1.63	0.674309	0.530412	0	0.612191			l(1)G0469	7.28837	1.20661	0.722577	1.92084	0.193931	0.153094
			Mkp3	69.3987	0.353981	0.273487	1.21191	0.249474	0.665372	0.916147			CG42870	0	0	0	0	0	0	0			lncRNA:CR46013	0	0	0	0	0	0	0			msk	0.837201	1.39768	1.93505	0.780319	0.490889	0	0.843985			pros	412.96	1.36377	0.593395	2.30238	0.130667	0.316034
			RapGAP1	35.4077	0.232895	0.408118	1.22984	0.30662	0.643619	0.523069			CG42811	0	0	0	0	0	0	0			CR46176	0	0	0	0	0	0	0			Alg-2	12.3454	0.539083	0.591008	1.02797	0.365041	0.748463	0.368646			Pgant2	6.90761	1.14354	0.854564	1.65979	0.197367	0.136412
			lgs	24.8202	0.292101	0.375735	0.859053	0.406465	0.792069	0.253251			CG42823	0	0	0	0	0	0	0			lncRNA:CR46052	0	0	0	0	0	0	0			CG10646	1.15235	1.27266	1.90918	0.586132	0.569839	0	0.428663			Syp	53.723	0.431589	0.281296	1.57187	0.226399	0.46584
			CG43850	1.10156	1.00444	1.78341	0.663929	0.408704	0.185671	0.68765			CG42828	0	0	0	0	0	0	0			lncRNA:TS1	0	0	0	0	0	0	0			crc	2.53336	0.937298	1.17997	0.722723	0.486692	0	0.410063			Snoo	8.54076	0.627079	0.578521	1.17547	0.323689	0.328774
			nAChRalpha1	18.2449	0.38963	0.746861	0.793308	0.471587	0.539765	0.329589			CG42878	0	0	0	0	0	0	0			lncRNA:CR46022	0	0	0	0	0	0	0			bnb	65.1977	0.608494	0.656633	1.09268	0.343954	0.504641	0.407574			scrt	69.6368	0.583277	0.25129	2.54061	0.106584	0.265954
			CG43795	10.4993	0.807571	1.3606	1.00672	0.379525	0.258418	0.712408			CG42812	0	0	0	0	0	0	0			lncRNA:TS26	0	0	0	0	0	0	0			ATPsynE	47.7539	0.465673	0.345706	1.52282	0.34968	0.578946	0.706454			Glut4EF	85.7574	0.503449	0.213688	2.49592	0.0632346	0.23865
			CG15107	2.09143	0.724025	1.4301	0.427834	0.553546	0.185671	0.256718			CG42834	0	0	0	0	0	0	0			lncRNA:CR46014	0	0	0	0	0	0	0			CG15098	39.5371	0.553736	0.471097	1.11708	0.334494	0.815381	0.42686			CG42402	25.4402	0.996603	0.687743	1.94965	0.188309	0.351093
			tna	63.8517	0.201244	0.273528	0.929095	0.368767	0.74583	0.177998			CG31380	0	0	0	0	0	0	0			CG31600	0	0	0	0	0	0	0			Arfrp1	0.822076	0.959309	1.8541	0.565819	0.582158	0	0.270678			CG30116	28.4189	0.715875	0.37788	2.18421	0.128155	0.248727
			Eip74EF	4.7981	0.531126	0.933733	0.534688	0.549184	0.369598	0.242061			CG43050	0	0	0	0	0	0	0			asRNA:CR46012	0	0	0	0	0	0	0			Snap24	0.830675	1.08447	2.76248	0.50723	0.624984	0	0.229321			sdt	44.4439	0.406031	0.313401	1.46519	0.249201	0.504016
			CG32085	1.69986	0.608427	1.65706	0.523773	0.566842	0.185671	0.285133			lncRNA:CR44170	0	0	0	0	0	0	0			CG13409	2.18113	0.43595	1.48907	0.341683	0.737413	0.614457	0.0910051			COX7A	55.6784	0.350118	0.298494	1.33287	0.299791	0.622086	0.357036			CG44774	28.7746	0.45473	0.351798	1.40397	0.267785	0.526545
			alpha-Man-IIb	4.59522	0.576541	1.24727	0.651058	0.550182	0.185671	0.46954			CG42832	0	0	0	0	0	0	0			lncRNA:CR46016	0	0	0	0	0	0	0			Cox17	6.604	0.679605	0.744477	0.912784	0.41406	0.324661	0.432339			Pdk1	12.6028	0.805478	0.485987	1.76709	0.178031	0.264575
			VAChT	40.3288	0.550236	0.861891	1.61222	0.291251	0.444873	0.855976			CG42824	0	0	0	0	0	0	0			lncRNA:TS27	0	0	0	0	0	0	0			Mdh1	93.3964	0.352215	0.465313	1.31257	0.285929	0.675423	0.26696			shep	324.402	0.27957	0.172403	1.72572	0.179782	0.433426
			lncRNA:CR44384	0.0445265	0.276169	1.11312	0.0767589	0.252356	0.0624704	0.0354405			tRNA:Thr-CGT-1-3	0	0	0	0	0	0	0			lncRNA:TS25	0	0	0	0	0	0	0			Spg7	0.796613	0.98872	2.06871	0.561756	0.593707	0	0.288022			kis	15.1457	0.521927	0.500793	1.2362	0.33253	0.344368
			CG2186	2.8664	0.582459	1.23904	0.438769	0.538711	0.185671	0.198721			CG42831	0	0	0	0	0	0	0			asRNA:CR45970	0	0	0	0	0	0	0			CG32368	52.1633	0.872421	0.804467	0.881362	0.410878	0.866375	0.563485			mtt	5.33403	1.46377	1.03062	1.81593	0.134417	0.0385998
			Pde6	60.7511	0.253686	0.32776	1.13113	0.413474	0.655345	0.480616			CG42822	0	0	0	0	0	0	0			lncRNA:CR46023	0	0	0	0	0	0	0			Vha68-2	14.686	0.787187	0.811909	0.83279	0.434429	0.556838	0.439504			qm	3.8291	1.26662	1.07214	1.39946	0.257585	0.110216
			Nnk	1.97758	0.989223	1.3566	0.750386	0.455572	0.124414	0.780985			CG43112	0	0	0	0	0	0	0			lncRNA:CR46017	0	0	0	0	0	0	0			Hsp83	10.6305	0.626947	0.686888	1.03529	0.392052	0.581663	0.530708			Kr-h1	5.8975	1.03648	0.695049	1.58525	0.214568	0.147187
			CG3726	15.265	0.309559	0.536438	0.827894	0.452917	0.682982	0.331816			asRNA:CR44169	0	0	0	0	0	0	0			lncRNA:TS3	0	0	0	0	0	0	0			l(1)G0004	1.98864	0.871435	1.38026	0.668046	0.534181	0	0.339875			CG10543	17.5586	0.477465	0.406893	1.22005	0.292765	0.56512
			Eip78C	4.32867	0.475561	1.19642	0.601997	0.538712	0.248155	0.468072			CG42833	0	0	0	0	0	0	0			CR46027	0	0	0	0	0	0	0			fok	37.5709	0.389339	0.440303	1.46018	0.33289	0.533639	0.53948			Tdg	22.1732	0.635353	0.380621	1.80902	0.169491	0.370487
			mask	7.49433	0.341583	0.730514	0.629304	0.508031	0.310531	0.194664			lncRNA:CR45976	0	0	0	0	0	0	0			asRNA:CR46020	0	0	0	0	0	0	0			TTLL4A	0.722668	1.12203	2.28696	0.483827	0.628579	0	0.230417			dpr13	35.0948	0.707858	0.597153	1.80399	0.159083	0.278349
			gish	64.0105	0.185218	0.238802	0.994957	0.47879	0.751497	0.265957			CG42835	0	0	0	0	0	0	0			lncRNA:CR46019	0	0	0	0	0	0	0			Diap1	11.6326	0.499995	0.566915	0.885035	0.376527	0.820807	0.212026			Mmp2	15.4333	0.879905	0.555886	1.83391	0.174025	0.209694
			CG13954	16.1197	0.620435	0.627976	1.1996	0.349252	0.496998	0.699524			CG42821	0	0	0	0	0	0	0			CR45932	0	0	0	0	0	0	0			RpL3	49.7191	0.394021	0.361221	1.24588	0.297586	0.695625	0.36419			lncRNA:noe	8250.26	0.313861	0.211124	1.49821	0.189303	0.492163
			brat	22.3377	0.279615	0.42349	0.989804	0.401122	0.622956	0.410449			CG43057	0	0	0	0	0	0	0			asRNA:CR46018	0	0	0	0	0	0	0			CG14561	0.344962	1.13559	2.71929	0.433852	0.666187	0	0.207341			mt:ATPase8	2.74323	1.43336	1.50537	1.26261	0.315885	0.0768701
			mbl	145.513	0.792124	0.684879	1.27387	0.28013	0.536208	3.08364			fd3F	0	0	0	0	0	0	0			sisRNA:1	0	0	0	0	0	0	0			Rme-8	0.407043	1.22127	2.84437	0.470016	0.646174	0	0.297146			TyrR	4.80202	1.04962	1.06012	1.26637	0.277949	0.121255
			Maf1	32.7946	0.227367	0.337589	0.864865	0.413049	0.766274	0.247405			CG43058	0	0	0	0	0	0	0			lncRNA:TS20	0	0	0	0	0	0	0			Acyp2	4.14235	0.623709	0.934316	0.757861	0.467976	0	0.236756			dnr1	0.844598	1.92652	1.60648	1.17078	0.236659	0
			eIF4EHP	28.8655	0.228271	0.393126	0.775369	0.441342	0.774185	0.165958			CG42819	0	0	0	0	0	0	0			lncRNA:TS6	0	0	0	0	0	0	0			Vha55	22.4284	0.472188	0.480787	1.13824	0.387194	0.649313	0.492361			CG43373	6.11157	1.58126	1.19586	1.93905	0.179872	0.0169143
			RpS17	81.5687	0.18449	0.227526	0.991183	0.430387	0.75669	0.238027			lncRNA:CR44121	0	0	0	0	0	0	0			lncRNA:TS9	0	0	0	0	0	0	0			CG6903	5.24949	0.67813	0.842495	0.795088	0.450914	0	0.318886			mbt	8.25455	0.865662	0.604588	1.55467	0.205069	0.129012
			Msp300	71.626	0.192407	0.303204	0.768566	0.474101	0.853162	0.1147			CG42818	0	0	0	0	0	0	0			CG46303	0	0	0	0	0	0	0			muc	9.90306	0.538959	0.6376	1.05607	0.414492	0.689623	0.482737			LRP1	4.95205	1.20463	1.14617	1.4755	0.248709	0.0964361
			CG7646	155.04	0.173884	0.170573	1.12195	0.367802	0.760307	0.304878			CG8389	1.61765	0.651444	1.52741	0.544545	0.53724	0.436766	0.313767			CG46026	0	0	0	0	0	0	0			CG31855	2.72027	0.892816	1.18608	0.903504	0.499584	0	0.805388			HDAC4	39.6308	0.56749	0.292255	2.12122	0.145522	0.355789
			Stacl	118.4	0.449069	0.363912	1.47458	0.2026	0.496157	0.608984			CG43049	0	0	0	0	0	0	0			lncRNA:CR46326	0	0	0	0	0	0	0			CG9356	0.737521	1.28901	2.0974	0.692858	0.539478	0	0.649544			Ssdp	48.0276	0.365187	0.26876	1.46741	0.24175	0.523988
			asRNA:CR44998	0.0425652	0.176053	0.865564	0.0507806	0.210119	0	0.0196254			lncRNA:CR44126	0	0	0	0	0	0	0			hpRNA:CR46342	0	0	0	0	0	0	0			rnh1	0.681328	1.02611	2.07382	0.510397	0.616428	0	0.258999			Rab35	13.9633	0.792276	0.489995	1.73334	0.196604	0.289188
			Eph	13.5296	0.277491	0.491006	0.650728	0.516929	0.619011	0.18696			CG43059	0	0	0	0	0	0	0			lncRNA:CR46328	0	0	0	0	0	0	0			CG13365	6.44917	0.787766	0.787712	0.968399	0.422508	0	0.636221			htk	2.1527	1.62432	1.34288	1.24337	0.239226	0.0450859
			CG2772	1.48648	1.9518	1.47646	1.00621	0.193349	0	2.41163			lncRNA:CR44125	0	0	0	0	0	0	0			lncRNA:TS2	0	0	0	0	0	0	0			CG7133	2.08316	0.961334	1.36602	0.622723	0.544591	0	0.337485			mgl	8.92525	1.08929	0.984447	1.73672	0.190846	0.151034
			pyd	12.4017	0.438759	0.891843	0.960221	0.438707	0.416142	0.465268			CG43083	0	0	0	0	0	0	0			CG32500	0	0	0	0	0	0	0			Picot	21.2874	0.667412	0.744114	0.861541	0.390171	0.551419	0.28958			flw	82.3026	0.330944	0.231088	1.53728	0.248558	0.486524
			X11Lbeta	18.9397	0.275869	0.494618	0.550854	0.511198	0.653456	0.101271			l(2)03659	0.440133	1.07974	2.12239	0.604536	0.43507	0.31179	1.15864			CG46302	0	0	0	0	0	0	0			CG31648	1.28407	1.00348	1.64735	0.725251	0.542344	0	0.60449			Lk6	64.5765	0.545545	0.264528	2.273	0.152359	0.300129
			cg	38.1566	0.223254	0.286104	0.778494	0.3733	0.837717	0.172638			tRNA:Asp-GTC-1-12	0	0	0	0	0	0	0			cmpy	12.2768	0.431629	0.694521	0.811221	0.284172	0.69125	0.360717			l(2)k09913	35.9844	0.365852	0.360401	1.09209	0.290768	0.718704	0.201026			Dg	5.94885	1.17443	0.919042	1.70111	0.263059	0.0690725
			wts	5.4048	0.386943	0.865242	0.515484	0.630005	0.185671	0.206892			lncRNA:CR44180	0	0	0	0	0	0	0			ds	0	0	0	0	0	0	0			Hsc70-5	3.39489	1.06123	1.05684	0.86421	0.473139	0	0.836999			hdc	52.3241	0.566124	0.331807	2.01784	0.151069	0.364208
			Rbp1-like	107.705	0.146977	0.208155	0.870938	0.496276	0.779216	0.127432			asRNA:CR44181	0	0	0	0	0	0	0			CR46177	0	0	0	0	0	0	0			CG10654	13.7996	0.733714	0.618391	0.968408	0.375987	0.5623	0.577106			CG30428	14.4514	0.756939	0.494607	1.69059	0.195775	0.296613
			bma	8.46601	0.492823	0.920489	0.647909	0.368397	0.307838	0.309873			CG42816	0	0	0	0	0	0	0			CG46338	0	0	0	0	0	0	0			Got2	34.9862	0.460692	0.648087	0.986895	0.382233	0.720641	0.229958			Cbp53E	161.228	0.663031	0.327901	2.19592	0.163196	0.372108
			lncRNA:Hsromega	987.285	0.393592	0.152801	2.33863	0.203524	0.533569	2.50032			tRNA:Leu-TAG-1-1	0	0	0	0	0	0	0			CG46305	0	0	0	0	0	0	0			CD98hc	13.4291	0.461271	0.564965	0.991554	0.398103	0.70202	0.296655			CG42847	0.633979	2.41152	2.01272	1.19072	0.2214	0
			CG2247	1.93468	0.594446	1.61847	0.460569	0.656575	0.185671	0.331728			asRNA:CR44087	0	0	0	0	0	0	0			CR46179	0	0	0	0	0	0	0			CG32195	8.6487	0.74011	0.963777	0.737881	0.461015	0.5623	0.26319			rad	52.0251	0.590231	0.671565	1.21932	0.330356	0.510857
			wge	6.53574	0.364206	0.757588	0.496293	0.560485	0.185671	0.165908			CG43054	0	0	0	0	0	0	0			wg	0	0	0	0	0	0	0			GstE8	1.72837	0.969963	1.79753	0.643218	0.554921	0	0.400431			lncRNA:CR45660	1.12849	2.32938	1.66629	1.4269	0.179618	0.0450859
			Cals	75.9549	0.167708	0.237548	0.881688	0.380272	0.819368	0.144574			CG42869	0	0	0	0	0	0	0			bves	5.07877	0.410706	0.740899	0.577659	0.487435	0.844881	0.287841			CG10731	0.926932	1.10458	1.84972	0.617798	0.564088	0	0.452557			l(3)80Fg	73.6927	0.463604	0.240386	2.07109	0.108839	0.328435
			snoRNA:2R:9445410	0.0167649	0.140115	0.489555	0.0344478	0.0980147	0.0624704	0.0182249			Tep5Psi	0	0	0	0	0	0	0			lncRNA:TS4	0	0	0	0	0	0	0			CG5001	0.718837	1.02424	2.63984	0.50236	0.62499	0	0.239001			Psi	5.93602	1.00398	0.773056	1.47071	0.238518	0.120657
			lncRNA:CR44596	0.0330971	0.221394	0.633036	0.0653105	0.136641	0	0.033537			CG42810	0	0	0	0	0	0	0			Fuca	0	0	0	0	0	0	0			alc	30.4444	0.482762	0.447189	0.993847	0.336643	0.832145	0.282094			CG33144	10.4267	0.896152	0.5732	1.77876	0.1592	0.114746
			Dop2R	352.641	0.887211	0.771014	1.20703	0.367602	0.531723	1.21909			CG31406	0	0	0	0	0	0	0			lncRNA:CR46015	0	0	0	0	0	0	0			CG14966	1.61259	0.999125	1.47331	0.690666	0.535057	0	0.516303			mask	8.27457	0.932537	0.697796	1.65664	0.249466	0.117741
			tau	17.7452	0.210801	0.444081	0.61964	0.489041	0.587751	0.108482			lncRNA:CR45958	0	0	0	0	0	0	0			mah	0	0	0	0	0	0	0			ATPsyndelta	30.5221	0.440143	0.401025	1.52275	0.37458	0.64746	0.875722			wts	5.97168	1.07439	0.734502	1.57245	0.24376	0.101081
			spab	71.7881	0.960125	1.34397	1.04805	0.350163	0.625374	1.22091			lncRNA:CR45957	0	0	0	0	0	0	0			CG46335	0	0	0	0	0	0	0			CG13663	1.91356	0.850989	2.10572	0.58647	0.571186	0	0.200553			kuz	18.4575	0.486187	0.453552	1.2062	0.350381	0.555332
			RpL9	40.9484	0.216637	0.318363	0.709672	0.523726	0.885849	0.14226			lncRNA:CR44059	0	0	0	0	0	0	0			lncRNA:CR46337	0	0	0	0	0	0	0			CG12344	5.64437	0.824564	1.74832	0.73351	0.500025	0	0.370476			plx	5.10818	0.685883	0.954531	0.909109	0.427173	0.179916
			Nipped-B	61.3671	0.147998	0.239662	0.831424	0.470708	0.832758	0.184663			CG31407	0	0	0	0	0	0	0			lncRNA:CR45971	0	0	0	0	0	0	0			Ppt1	1.86241	0.937256	1.46109	0.717668	0.511363	0	0.465683			Eip74EF	3.202	1.3476	1.09183	1.42285	0.24639	0.052977
			RpL8	55.4529	0.1554	0.265083	0.825473	0.440648	0.835357	0.139268			CG43120	0	0	0	0	0	0	0			btl	0	0	0	0	0	0	0			dmt	1.06274	1.55328	1.84468	0.813701	0.523491	0	1.1973			Cam	503.645	0.248097	0.160341	1.69396	0.204407	0.455646
			asRNA:CR44381	0.0487521	0.252238	0.802715	0.0756688	0.191042	0	0.0376079			CG11699	7.54004	0.209731	0.613612	0.325988	0.662227	0.846104	0.0659186			lncRNA:CR46336	0	0	0	0	0	0	0			RpS3	43.1828	0.350734	0.335567	1.16002	0.32157	0.660277	0.263815			Patronin	5.65625	0.960491	0.805655	1.35193	0.261518	0.130238
			ttv	21.7323	0.426971	0.427192	1.01802	0.403785	0.630593	0.462395			Atg17	4.04834	0.257108	0.784619	0.324564	0.604592	0.561648	0.128664			CG11883	2.6587	0.767735	1.6247	0.492518	0.496245	0.614457	0.509588			Fdx2	7.60626	0.691917	0.6462	0.944361	0.412246	0.324661	0.570797			didum	3.77229	1.08171	1.01503	1.28727	0.304168	0.0798335
			dpr8	41.401	0.16902	0.400803	0.567697	0.425182	0.735446	-0.0384545			CG43056	0	0	0	0	0	0	0			asRNA:CR45969	0	0	0	0	0	0	0			CG17896	35.6426	0.719449	0.622465	0.94785	0.365002	0.810876	0.487826			Dab	9.22878	0.950276	0.634758	1.69459	0.196082	0.181686
			CG43759	12.6992	0.53527	0.720226	0.623359	0.411201	0.506675	0.402224			lncRNA:CR44057	0	0	0	0	0	0	0			Syt4	36.2442	0.196107	0.273896	0.737777	0.519077	0.998254	0.169158			CG13937	12.0752	1.08154	1.74474	0.778767	0.529353	0.30613	0.808837			CG11122	16.5834	0.731571	0.433129	1.78969	0.143895	0.342201
			CG33543	26.4688	0.741623	0.75063	1.04453	0.369478	0.610008	0.942368			CG43052	0	0	0	0	0	0	0			lncRNA:CR46125	0.0108484	0.0150443	0.271246	0.00426643	0.0735207	0.0769183	0.000295575			Indy	7.3999	1.05712	2.11778	0.765394	0.550264	0.193136	0.741179			osa	11.3796	0.789274	0.553811	1.66327	0.202236	0.228438
			trn	20.4491	0.509747	0.692034	0.844045	0.366711	0.590359	0.422797			CG43060	0	0	0	0	0	0	0			asRNA:CR45968	0	0	0	0	0	0	0			Arpc2	1.43503	1.10769	1.54471	0.852866	0.526111	0	1.01166			Pkc53E	74.1886	0.541553	0.300588	1.79013	0.154958	0.405672
			CR40190	0.101334	0.661889	1.39187	0.225173	0.271861	0.0612565	0.186833			lncRNA:CR45956	0	0	0	0	0	0	0			CG2662	0.736459	0.546873	2.17041	0.304955	0.624104	0.537558	0.138482			Pglym78	94.0712	0.408068	0.311087	1.5034	0.371841	0.598347	0.633031			robo1	3.5404	1.09506	1.01432	1.16384	0.322361	0.107773
			tinc	5.61706	0.398653	1.24209	0.446991	0.67308	0.248155	0.159128			CG42820	0	0	0	0	0	0	0			Scp2	32.2107	1.02211	1.21233	0.975169	0.33833	0.768075	1.29463			Vps24	4.3347	0.655247	0.873745	0.798869	0.456652	0	0.326562			Rbfox1	115.741	0.429962	0.212619	2.18448	0.135562	0.343644
			asRNA:CR43476	0.0140274	0.0854929	0.441726	0.0241928	0.106138	0	0.0126835			lncRNA:CR45963	0	0	0	0	0	0	0			ben	19.7508	0.265533	0.386349	0.635474	0.535027	0.995074	0.172123			Sox14	2.21238	1.32219	1.33362	0.780336	0.508616	0	1.02076			Rab26	19.9433	0.720718	0.450374	1.84267	0.146085	0.296114
			CG7139	2.94815	0.319124	1.10263	0.380467	0.677819	0.185671	0.108987			CG31265	0	0	0	0	0	0	0			flz	0.00609192	0.00152383	0.293611	0.000399228	0.0766045	0.0769004	2.74615e-06			sun	50.0509	0.328389	0.334745	1.20844	0.327196	0.664826	0.276897			CG43102	6.0878	0.940949	0.762296	1.41326	0.227922	0.0971719
			CG4080	7.21296	0.54647	0.747548	0.899991	0.404932	0.303417	0.554578			asRNA:CR44176	0	0	0	0	0	0	0			CG46059	0	0	0	0	0	0	0			CG5567	7.85739	0.638017	0.823784	0.86788	0.454862	0.327363	0.401746			sty	20.3634	0.909037	0.716597	1.60533	0.240871	0.338584
			CG7990	22.3506	0.357593	0.443701	1.06475	0.305181	0.686742	0.367572			Qsox4	0	0	0	0	0	0	0			lncRNA:CR46141	0	0	0	0	0	0	0			RpS27A	86.2025	0.320988	0.326812	1.15186	0.271822	0.717903	0.179503			CG7637	2.94236	1.36275	1.41871	1.14729	0.334615	0.0891762
			nAChRbeta1	77.0248	0.162667	0.242532	0.78207	0.507088	0.828919	0.162916			CG43114	0	0	0	0	0	0	0			lncRNA:CR46142	0	0	0	0	0	0	0			Ttc19	1.77924	0.877515	1.38031	0.679881	0.531279	0	0.39773			raptor	5.31353	0.931791	0.860589	1.26405	0.240642	0.103851
			lncRNA:CR43641	0.0492109	0.299427	1.06482	0.0864271	0.245598	0	0.0494848			lncRNA:CR45964	0	0	0	0	0	0	0			lncRNA:CR46147	0	0	0	0	0	0	0			Roe1	2.33897	0.79838	1.18234	0.625699	0.541824	0	0.2774			CG12531	10.1119	0.822635	0.665862	1.44497	0.276951	0.232067
			ari-1	11.4054	0.385587	0.566061	0.962186	0.372046	0.539382	0.446884			CG44044	0	0	0	0	0	0	0			asRNA:CR46058	0	0	0	0	0	0	0			Snap29	10.8239	0.685822	0.953655	0.691101	0.500789	0.275259	0.250941			ab	18.0578	0.792086	0.767512	1.54423	0.231441	0.234211
			Cadps	41.3103	0.290881	0.295317	1.28769	0.316693	0.681227	0.482516			lncRNA:CR44058	0	0	0	0	0	0	0			lncRNA:CR46132	0	0	0	0	0	0	0			CG10550	22.9548	0.972717	1.11346	0.797377	0.472024	0.306254	0.618266			Vap33	66.6089	0.4457	0.25818	1.98161	0.187933	0.39188
			RpS6	50.0081	0.171549	0.295665	0.67868	0.456604	0.825922	0.13312			lncRNA:CR44055	0	0	0	0	0	0	0			asRNA:CR46140	0	0	0	0	0	0	0			UbcE2M	3.86124	0.848308	1.04414	0.719827	0.499928	0	0.413795			Pde6	61.6041	0.576296	0.342564	1.8633	0.215658	0.349453
			Mst77F	0.229965	0.455177	0.861523	0.245991	0.202064	0	0.180629			CG31373	0	0	0	0	0	0	0			Sema5c	0	0	0	0	0	0	0			Miro	1.17253	0.979589	2.25005	0.551848	0.6057	0	0.300239			wge	8.26079	0.933401	0.700684	1.54836	0.214547	0.153486
			lncRNA:CR45034	0.0139943	0.0920066	0.441726	0.0260361	0.104502	0	0.00961135			lncRNA:CR44048	0	0	0	0	0	0	0			asRNA:CR46145	0	0	0	0	0	0	0			ppl	3.01036	1.02042	1.18436	0.715771	0.514469	0	0.539379			hrm	17.0879	0.618143	0.430666	1.59012	0.214068	0.344397
			lncRNA:CR45540	0.0605519	0.440481	1.34155	0.122734	0.279115	0.0624704	0.0614046			CG31404	0	0	0	0	0	0	0			asRNA:CR46144	0	0	0	0	0	0	0			cin	0.880813	1.05747	2.32887	0.488142	0.634285	0	0.274882			Nup358	1.45051	0.958085	1.81809	0.660428	0.569499	0.0450859
			lncRNA:CR43608	0.0158274	0.127437	0.441726	0.0360623	0.0977316	0	0.0314684			CG31391	0	0	0	0	0	0	0			Atox1	19.9883	0.226112	0.374612	0.659866	0.519761	0.998254	0.183219			Nup44A	1.61383	1.05296	1.43829	0.811831	0.533339	0	0.884329			jvl	10.4843	0.694011	0.601756	1.33917	0.254331	0.239506
			lncRNA:CR44410	0.0172098	0.134952	0.441681	0.0381912	0.0951542	0	0.0184176			Kaz1-ORFA	0	0	0	0	0	0	0			lncRNA:CR46143	0	0	0	0	0	0	0			ghi	9.22701	0.519977	0.633495	0.818872	0.432284	0.811332	0.245788			CG31635	17.796	0.615026	0.429607	1.62038	0.216885	0.399619
			asRNA:CR43957	0.982863	0.690474	1.35965	0.440675	0.430387	0.0612565	0.397535			tRNA:Thr-CGT-1-2	0	0	0	0	0	0	0			asRNA:CR46138	0	0	0	0	0	0	0			CG12375	3.03311	0.744138	1.06011	0.646052	0.524828	0	0.254561			Mkp3	62.6422	0.312114	0.290661	1.17185	0.327402	0.578186
			lncRNA:CR43631	0.0197797	0.087311	0.654201	0.0256565	0.167548	0	0.0137359			lncRNA:CR43053	0	0	0	0	0	0	0			lncRNA:CR45966	0	0	0	0	0	0	0			CG32280	3.15372	0.769784	1.26635	0.652831	0.532118	0	0.266282			CG11768	9.54924	1.088	1.07093	1.37635	0.244242	0.120085
			Syngr	9.1408	0.4283	0.682726	0.955447	0.424162	0.372935	0.486055			lncRNA:CR45959	0	0	0	0	0	0	0			CG13920	16.0942	0.240846	0.390054	0.623069	0.479814	0.998254	0.164451			eEF5	41.2634	0.598312	0.390646	1.23407	0.327314	0.63818	0.82036			CG32206	10.153	0.522442	0.597853	1.01077	0.428398	0.384094
			lncRNA:CR44754	0.0657043	0.0973425	0.101836	0.0597424	0.0211958	0	0.0457149			CG44174	0	0	0	0	0	0	0			jagn	5.05194	0.330615	0.764521	0.484285	0.589378	0.768075	0.14202			CG8180	2.97872	1.44241	1.35605	0.856827	0.505694	0	1.26207			ph-p	2.64772	1.1399	1.11967	1.03242	0.364576	0.0450859
			tbc	13.0655	0.527642	0.564167	0.881259	0.372619	0.461914	0.618991			CG43061	0	0	0	0	0	0	0			asRNA:CR46136	0	0	0	0	0	0	0			AdipoR	7.86756	0.601507	0.706296	0.861133	0.42537	0.180346	0.336909			east	11.2215	0.65405	0.55842	1.40135	0.28193	0.205361
			Ptp99A	95.0252	0.260744	0.306621	1.27429	0.354594	0.543373	0.386485			lncRNA:CR44175	0	0	0	0	0	0	0			Cyp6u1	1.18031	0.650902	1.86703	0.361902	0.659027	0.614457	0.28658			Cdk9	1.31124	0.88502	1.58149	0.58184	0.583865	0	0.307966			CG33639	10.7995	0.96755	0.750182	1.41491	0.253599	0.270795
			Cp110	20.3324	0.317194	0.416643	0.972051	0.352889	0.697248	0.321886			lncRNA:CR45975	0	0	0	0	0	0	0			lncRNA:CR46131	0	0	0	0	0	0	0			RpL8	46.3215	0.353128	0.352031	1.03532	0.320707	0.725941	0.196014			anne	41.4802	0.503216	0.294409	1.96859	0.17499	0.376523
			dpr4	1.60684	0.5989	1.42015	0.529229	0.457638	0.124078	0.326329			lncRNA:CR44120	0	0	0	0	0	0	0			lncRNA:CR46130	0	0	0	0	0	0	0			Rack1	36.9312	0.403147	0.429727	1.0286	0.336421	0.784037	0.244283			Graf	11.3898	0.652831	0.540656	1.39294	0.215545	0.325331
			lncRNA:CR43399	0.00920964	0.0717231	0.220863	0.0202963	0.0465861	0	0.00915356			snoRNA:U3:54Ab	0	0	0	0	0	0	0			Klp10A	3.17675	0.475292	0.995181	0.45579	0.588185	0.691227	0.348076			ScpX	2.89425	0.77941	1.28486	0.633098	0.538001	0	0.262351			rb	3.11896	1.24421	1.10844	1.32538	0.356412	0.04603
			Sirup	17.3355	0.627296	0.569831	1.39469	0.336548	0.512188	1.82949			betaNACtes5	0	0	0	0	0	0	0			eIF3l	16.3677	0.248965	0.451234	0.636285	0.448919	0.921729	0.177872			loco	3.98143	0.730269	1.11782	0.688106	0.520761	0	0.320067			Gfrl	24.4803	0.643655	0.561796	1.66091	0.263749	0.376733
			lncRNA:CR44761	0.00901555	0.111511	0.220863	0.0315556	0.0383523	0	0.0236503			Pxt	0	0	0	0	0	0	0			CG46306	0	0	0	0	0	0	0			Npc2a	68.9625	0.695151	0.641653	0.928191	0.417154	0.883048	0.432041			Fife	22.2161	0.602227	0.403261	1.63228	0.17553	0.417568
			CG32432	13.212	0.449198	0.492298	1.13495	0.290876	0.524532	0.76945			asRNA:CR44049	0	0	0	0	0	0	0			scb	0.0100899	0.0619467	0.271832	0.0175297	0.0630565	0	0.00534766			RecQ5	0.858053	1.0026	2.0796	0.523979	0.612383	0	0.287837			Su(dx)	2.0541	1.2531	1.27971	1.0541	0.357396	0.0450859
			bel	32.4565	0.154818	0.31951	0.587546	0.516503	0.850089	0.108079			pre-mod(mdg4)-N	0	0	0	0	0	0	0			CG1943	7.59073	0.361272	0.614149	0.426945	0.532808	0.844881	0.161794			mt:ND6	41.0376	0.442549	0.515645	0.946754	0.379205	0.809621	0.252299			rno	3.86463	1.0094	0.93689	1.18832	0.327482	0.0891452
			CG32206	11.5001	0.489189	0.635767	0.892364	0.421115	0.426132	0.458576			lncRNA:CR42836	0	0	0	0	0	0	0			asRNA:CR46128	0	0	0	0	0	0	0			CG10512	4.16295	0.728878	1.23934	0.802455	0.486105	0	0.432589			Frl	22.5343	0.393511	0.388318	1.07391	0.366782	0.638413
			squ	0.177094	0.751833	2.10003	0.255384	0.490027	0.0619437	0.136133			lncRNA:CR45954	0	0	0	0	0	0	0			asRNA:CR46129	0	0	0	0	0	0	0			Trs23	2.37415	0.657944	1.14164	0.604531	0.548215	0	0.173281			lncRNA:CR44831	0.580959	1.34581	2.46155	0.65971	0.517549	0
			dtn	14.3958	0.388507	0.591588	1.02564	0.35618	0.529617	0.506129			CG44102	0.0106351	0.106433	0.238559	0.0278843	0.0409681	0.0624816	0.0195234			CG46313	0	0	0	0	0	0	0			Hmgs	1.2013	1.45224	1.80862	1.04108	0.545093	0	2.38364			C3G	7.47542	0.906646	0.796716	1.34298	0.253724	0.214542
			tipE	15.2471	0.397558	0.633474	0.974916	0.388045	0.43247	0.440806			CG43116	0	0	0	0	0	0	0			CG46307	0	0	0	0	0	0	0			for	2.45561	1.20761	1.30876	0.833878	0.504621	0	1.11291			yrt	7.73893	0.764833	0.647401	1.22688	0.239832	0.219361
			RpL36	153.039	0.098721	0.179753	0.820052	0.43549	0.789999	0.111541			lncRNA:CR44051	0	0	0	0	0	0	0			lncRNA:CR46126	0	0	0	0	0	0	0			mRpS14	3.66771	0.763932	1.0525	0.715888	0.509265	0	0.361745			Hsc70Cb	7.07803	0.909054	0.701098	1.40642	0.2442	0.145172
			Prosalpha4	5.76707	0.3313	0.903707	0.388506	0.679643	0.249135	0.132997			asRNA:CR45974	0	0	0	0	0	0	0			Galphao	21.953	0.202914	0.366171	0.615264	0.577312	0.998254	0.126324			CG11668	2.79538	0.854338	1.57861	0.637668	0.563355	0	0.317446			nkd	15.3726	0.945447	0.578562	2.0338	0.111811	0.168521
			CR43309	0.0549545	0.129176	0.801635	0.0396573	0.218802	0	0.0144681			CG42866	0	0	0	0	0	0	0			Tom7	41.424	0.203354	0.298017	0.721313	0.359776	0.998254	0.192727			CG10681	0.862363	0.860192	1.90848	0.469613	0.641486	0	0.174964			dsd	7.38261	0.784702	0.680718	1.34515	0.30228	0.181587
			CG44426	0.00732904	0.090594	0.220863	0.0256363	0.0426046	0	0.015077			CG42876	0	0	0	0	0	0	0			CG15891	5.98245	0.284813	0.63608	0.487624	0.511453	0.768056	0.143754			CCT7	1.46476	1.15453	1.51948	0.655106	0.551096	0	0.629988			pum	214.042	0.366248	0.189615	2.04112	0.166361	0.362776
			lncRNA:CR43423	0.0328644	0.0353747	0.132413	0.0166971	0.0493344	0	0.00363405			lncRNA:CR45138	0	0	0	0	0	0	0			mtd	43.98	0.153475	0.258572	0.653257	0.34962	0.998254	0.0942522			mRpS18B	0.559857	1.01392	2.82744	0.434105	0.669382	0	0.17961			Octbeta3R	16.4384	0.682922	0.596752	1.32919	0.247354	0.344796
			CG45045	0.00422733	0.000426933	0.220863	0.000120814	0.0624036	0	2.8619e-07			lncRNA:CR44136	0	0	0	0	0	0	0			mRpS9	6.33781	0.351277	0.779488	0.462419	0.663034	0.768056	0.175917			CG18731	1.88191	1.17561	1.31183	0.816259	0.504734	0	0.991866			dnc	72.8694	0.410009	0.255909	1.75072	0.201625	0.422866
			CG32425	16.3955	0.328793	0.489167	0.876425	0.4282	0.606216	0.288058			CG44140	0	0	0	0	0	0	0			Nrx-1	12.1343	0.249751	0.472731	0.548818	0.462021	0.998254	0.148231			CLS	2.4446	0.838479	1.70492	0.558477	0.593389	0	0.240389			CG14442	11.8936	0.659765	0.496414	1.41697	0.272661	0.409346
			asRNA:CR43464	0.00501545	0.00192749	0.220863	0.000545443	0.0620648	0	5.84922e-06			Hsp70Bbb	0	0	0	0	0	0	0			lncRNA:CR46123	0	0	0	0	0	0	0			CG33695	0.380928	1.11036	2.79897	0.425937	0.67574	0	0.242789			shi	110.485	0.274178	0.218229	1.26503	0.284525	0.598983
			Akt	1.2799	0.849581	1.87966	0.501104	0.593338	0.185671	0.39096			asRNA:CR45968	0	0	0	0	0	0	0			CCT8	3.21257	0.558642	1.00768	0.473183	0.570025	0.614457	0.417441			CG32112	0.831716	0.92327	2.47107	0.505982	0.63425	0	0.25346			side-III	22.9041	0.771306	0.575955	1.77258	0.208413	0.35594
			CG44838	26.7451	0.315331	0.370748	0.990322	0.391138	0.786167	0.347836			CG44141	0	0	0	0	0	0	0			CG2680	5.47913	0.571269	1.21561	0.416839	0.669618	0.614457	0.306065			RpS4	69.396	0.320423	0.305451	1.07759	0.284249	0.751312	0.172435			kek6	5.7792	0.919859	0.82608	1.29985	0.32156	0.147883
			Rbp1	19.9557	0.157458	0.379227	0.516616	0.553838	0.834546	0.0797423			lncRNA:CR45966	0	0	0	0	0	0	0			lncRNA:CR46217	0.0212777	0.0309453	0.564422	0.00875632	0.146873	0.0769004	0.00115895			nac	1.08741	0.799298	1.63912	0.496828	0.619948	0	0.16654			MYPT-75D	17.6067	0.744825	0.50171	1.54176	0.25138	0.34507
			gpp	16.9095	0.318115	0.441875	0.913502	0.334844	0.689907	0.27615			lncRNA:CR44133	0	0	0	0	0	0	0			lncRNA:CR44776	0.00851316	0.0309541	0.271832	0.00875941	0.0699492	0.0769217	0.0012776			coil	0.391676	1.16855	3.08537	0.513985	0.646971	0	0.456082			fend	37.974	0.489656	0.379342	1.49224	0.265981	0.448264
			nrm	10.6241	0.387208	1.05155	0.460938	0.580812	0.501491	0.323179			CG44139	0	0	0	0	0	0	0			lncRNA:CR46061	0.00835213	0.0200454	0.271832	0.00567245	0.0724012	0	0.00052741			Ypel	1.41709	1.03234	1.42572	0.709257	0.530336	0	0.629647			Cirl	10.7785	0.79765	0.607013	1.52868	0.255612	0.203482
			lncRNA:CR43604	0.0122815	0.0849567	0.20026	0.0265145	0.0419623	0	0.0146993			asRNA:CR44052	0	0	0	0	0	0	0			lncRNA:CR46122	0	0	0	0	0	0	0			temp	14.3864	0.457153	0.579126	0.817138	0.422627	0.603361	0.180023			CG14073	5.16981	0.87938	0.776141	1.21142	0.323971	0.129798
			lncRNA:CR43410	0	0	0	0	0	0	0			sns	0.946177	0.619286	1.45428	0.388708	0.415663	0.374297	0.216011			CG46317	0	0	0	0	0	0	0			RpL17	79.8505	0.337426	0.34208	1.05497	0.326859	0.703563	0.192482			Shawl	5.59237	1.14151	0.995828	1.59726	0.178307	0.0570937
			lncRNA:CR45032	0	0	0	0	0	0	0			asRNA:CR45969	0	0	0	0	0	0	0			asRNA:CR46066	0.00918559	0.0200454	0.271832	0.00567245	0.0724012	0	0.00052741			eEF1gamma	15.0253	0.600886	0.598049	0.9929	0.416559	0.689679	0.518119			kmr	11.6728	0.69881	0.604897	1.34226	0.268165	0.306526
			lncRNA:CR43414	0	0	0	0	0	0	0			CG31358	0	0	0	0	0	0	0			CG46315	0	0	0	0	0	0	0			CG9067	1.92425	0.792853	1.50425	0.520797	0.602675	0	0.177953			Ptp99A	90.4917	0.445002	0.279246	1.66425	0.149512	0.359346
			CG43405	0	0	0	0	0	0	0			miple1	96.5204	-0.410385	0.492233	0.809838	0.273089	0.757527	-0.914388			CG46314	0	0	0	0	0	0	0			AGO2	2.9936	0.750986	0.999843	0.691142	0.522144	0	0.35204			dsh	2.23965	1.33625	1.37076	1.09824	0.375148	0.0450859
			asRNA:CR43413	0	0	0	0	0	0	0			lncRNA:CR45973	0	0	0	0	0	0	0			Ald1	106.117	0.154869	0.260129	0.73343	0.318241	0.998254	0.143115			CG12093	3.64306	0.922596	1.00307	0.815333	0.489807	0	0.692824			l(1)G0196	11.6272	0.614712	0.51007	1.27763	0.290567	0.367584
			asRNA:CR45026	0	0	0	0	0	0	0			tRNA:Thr-TGT-1-1	0	0	0	0	0	0	0			FASN3	0	0	0	0	0	0	0			COX7C	49.3866	0.315017	0.323486	1.14113	0.355559	0.65211	0.252176			puc	7.61256	0.845701	0.65775	1.43842	0.30328	0.260371
			lncRNA:CR43409	0	0	0	0	0	0	0			CG31343	0	0	0	0	0	0	0			CG46318	0	0	0	0	0	0	0			krz	1.93063	0.76466	1.3434	0.618889	0.563208	0	0.290726			rut	16.2267	0.571711	0.491215	1.35274	0.283554	0.32411
			lncRNA:CR43412	0	0	0	0	0	0	0			Fas1	33.811	0.232389	0.318038	0.934057	0.373402	0.927733	0.296442			CG46316	0	0	0	0	0	0	0			Paics	3.22274	0.758037	1.78854	0.629789	0.560118	0	0.300191			CR41320	0.647505	1.62712	2.42849	0.813462	0.467497	0.0450859
			asRNA:CR43470	0	0	0	0	0	0	0			CG31347	0	0	0	0	0	0	0			CG46448	0	0	0	0	0	0	0			Kdm3	0.58951	1.11063	2.5926	0.405137	0.686224	0	0.199682			Octalpha2R	23.4402	0.586804	0.71945	1.5059	0.243908	0.37738
			asRNA:CR45044	0	0	0	0	0	0	0			lncRNA:CR45971	0	0	0	0	0	0	0			CR46425	0	0	0	0	0	0	0			CG3902	16.7063	1.09279	0.855548	0.991305	0.497595	0.431617	1.40149			fs(1)h	46.749	0.652621	0.269248	2.58277	0.105904	0.241352
			asRNA:TS15	0.00903153	0.090594	0.220863	0.0256363	0.0426046	0	0.015077			CG16890	1.08387	0.361421	2.07137	0.163787	0.738329	0.436766	0.0307692			CG46319	0	0	0	0	0	0	0			CG9467	16.1615	0.545875	0.952951	0.975557	0.492649	0.365669	0.36959			CG43737	55.8579	0.440426	0.274255	1.75802	0.21349	0.432555
			asRNA:CR43469	0	0	0	0	0	0	0			asRNA:CR45970	0	0	0	0	0	0	0			CG46312	0	0	0	0	0	0	0			Arf51F	9.78681	0.549396	0.657791	0.944901	0.438331	0.424887	0.401228			RNaseMRP:RNA	0.528347	2.05696	2.6778	0.767314	0.410767	0.0450859
			asRNA:CR43433	0	0	0	0	0	0	0			asRNA:CR44134	0	0	0	0	0	0	0			CG46308	0	0	0	0	0	0	0			CG42709	5.45575	0.964952	1.19292	0.878286	0.46231	0.191967	0.810999			sqz	1.63629	1.46231	1.44592	1.05097	0.398232	0.0450859
			stol	82.3332	0.12661	0.218695	0.677431	0.46245	0.847202	0.0911579			CG31269	0	0	0	0	0	0	0			emc	32.1112	0.183974	0.285016	0.597793	0.493384	0.998254	0.104126			Cisd2	20.7529	0.40758	0.443304	1.1683	0.429099	0.634902	0.499817			fray	2.07193	1.09314	1.54255	0.930525	0.403527	0.0450859
			lncRNA:CR43440	0	0	0	0	0	0	0			CG31268	0	0	0	0	0	0	0			Osi10a	0	0	0	0	0	0	0			ArgRS	0.597538	0.939715	2.27532	0.414435	0.678803	0	0.159376			GluRIB	25.9782	0.960465	0.668253	2.18362	0.159315	0.226711
			lncRNA:CR44376	0.0165089	0.0853837	0.421123	0.0266353	0.104366	0	0.0146996			Mic26-27	31.6567	0.1172	0.332821	0.386093	0.654938	0.977822	0.0307914			CR46417	0	0	0	0	0	0	0			eIF4A	91.9016	0.260917	0.2642	1.21965	0.29823	0.677224	0.20125			28SrRNA-Psi:CR45859	0.371232	1.19392	1.76377	0.53648	0.375086	0
			CG43438	0	0	0	0	0	0	0			lncRNA:CR45991	0	0	0	0	0	0	0			lncRNA:CR46414	0	0	0	0	0	0	0			CG5104	1.12262	1.11482	1.94566	0.534339	0.609556	0	0.406717			e(r)	6.40285	0.738704	0.76446	1.1188	0.363997	0.180353
			asRNA:CR43460	0	0	0	0	0	0	0			lncRNA:CR45993	0	0	0	0	0	0	0			CG46320	0	0	0	0	0	0	0			CG3308	1.08945	0.997401	1.70599	0.590447	0.58361	0	0.433472			ctrip	5.4687	0.766809	0.843862	1.06908	0.382392	0.165993
			lncRNA:CR45029	0	0	0	0	0	0	0			Appl	57.9907	-0.112723	0.634192	1.12106	0.228222	0.791898	-0.0942592			CG46321	0	0	0	0	0	0	0			eIF3c	2.64124	0.673262	1.15823	0.6889	0.544829	0	0.339302			dpr10	12.3929	0.553604	0.648979	1.23329	0.27162	0.395468
			asRNA:CR43467	0	0	0	0	0	0	0			CG31267	0	0	0	0	0	0	0			CG46310	0	0	0	0	0	0	0			Sap130	0.457853	1.07326	2.56001	0.414037	0.684928	0	0.231409			Mnt	16.0665	0.524435	0.43832	1.32217	0.303286	0.493979
			lncRNA:CR43434	0	0	0	0	0	0	0			CG31266	0	0	0	0	0	0	0			l(2)k05911	0	0	0	0	0	0	0			Tcs5	0.912242	1.02277	1.93872	0.560336	0.606894	0	0.375105			CG16779	32.9791	0.432928	0.333797	1.52855	0.249738	0.480798
			CG43407	0	0	0	0	0	0	0			asRNA:CR45995	0	0	0	0	0	0	0			CG46309	0	0	0	0	0	0	0			eco	0.608524	1.01653	2.6633	0.510612	0.644429	0	0.365298			Octbeta2R	21.1286	0.586084	0.514101	1.45809	0.268077	0.427298
			asRNA:CR43465	0	0	0	0	0	0	0			fwe	19.9162	0.271869	0.42705	0.777689	0.409636	0.811081	0.243438			CG46311	0	0	0	0	0	0	0			Cpr	5.80383	0.545435	0.791582	0.796035	0.497406	0	0.317859			CG1695	26.3385	0.474199	0.379181	1.38651	0.239509	0.512312
			CR43441	0	0	0	0	0	0	0			Syt7	27.2163	-0.00156254	0.62675	0.570155	0.48569	0.811081	0.0309438			Osi21	0	0	0	0	0	0	0			levy	61.0242	0.312756	0.3491	1.28777	0.404048	0.651574	0.436994			jeb	132.675	0.798543	0.458402	2.26527	0.117469	0.2881
			asRNA:CR43474	0	0	0	0	0	0	0			Idh3a	26.3983	0.293415	0.387538	0.840373	0.317745	0.888901	0.263131			CG13484	1.65579	0.446148	1.51802	0.29822	0.597136	0.537558	0.0729862			AnxB11	4.45342	0.717228	0.949787	0.794742	0.486816	0	0.458584			Dd	18.0383	0.506751	0.419251	1.36425	0.252558	0.530835
			lncRNA:CR43475	0	0	0	0	0	0	0			Gpdh1	18.3265	0.300159	0.442665	0.783873	0.37466	0.881284	0.276549			lncRNA:CR46348	0	0	0	0	0	0	0			Smox	4.2343	0.548391	0.944634	0.679311	0.532092	0	0.221162			CG17124	33.4361	0.442089	0.336525	1.37679	0.22832	0.523935
			CG43439	0	0	0	0	0	0	0			asRNA:CR44130	0	0	0	0	0	0	0			lncRNA:CR46350	0	0	0	0	0	0	0			Grasp65	1.35103	0.760579	1.60469	0.49083	0.624782	0	0.155953			Cip4	13.0516	0.548304	0.546713	1.15832	0.321186	0.455038
			lncRNA:CR43406	0	0	0	0	0	0	0			lncRNA:CR44131	0	0	0	0	0	0	0			CR46405	0	0	0	0	0	0	0			HSPC300	3.12835	0.670646	1.15788	0.581489	0.568304	0	0.196793			AstC-R2	8.38492	1.22456	0.999167	1.52236	0.223757	0.199604
			asRNA:CR43472	0	0	0	0	0	0	0			UbcE2H	1.61555	0.744259	1.37158	0.535388	0.569025	0.499141	0.499682			CG1902	4.58512	0.38101	0.842838	0.400056	0.624672	0.691227	0.15812			Abcd3	1.0417	1.01674	1.9832	0.474288	0.644956	0	0.275327			bab2	4.51876	1.03918	0.995974	1.32285	0.270579	0.0956351
			ed	9.85759	0.602251	0.797811	0.913996	0.361657	0.351719	0.650092			CG4267	0	0	0	0	0	0	0			CG46491	0	0	0	0	0	0	0			Jheh2	7.74246	1.1465	0.963745	0.912948	0.488879	0.614416	1.2331			CG33229	8.90368	0.613106	0.556177	1.20864	0.29614	0.295359
			lncRNA:CR44411	0.0090253	0.0920945	0.220863	0.026061	0.0422935	0	0.0156198			CG43084	0	0	0	0	0	0	0			dbf	0	0	0	0	0	0	0			MAPk-Ak2	3.34882	0.759723	1.03289	0.714944	0.513876	0	0.395544			BtbVII	10.3193	0.598537	0.533149	1.19765	0.336005	0.412014
			asRNA:CR43477	0	0	0	0	0	0	0			lncRNA:CR44103	0	0	0	0	0	0	0			asRNA:CR46092	0.00387424	0.00668012	0.271431	0.00189314	0.0754127	0.0769183	5.75292e-05			ORMDL	2.40162	0.702258	1.17677	0.627956	0.562916	0	0.291133			msn	3.48698	0.986479	1.16406	1.05705	0.349793	0.0745815
			PMCA	52.6341	0.233006	0.291275	1.00523	0.367862	0.799434	0.217398			CG43062	0	0	0	0	0	0	0			ccb	0	0	0	0	0	0	0			c12.2	0.625044	1.04077	2.77033	0.393227	0.695154	0	0.168414			CG5521	2.23495	1.0583	1.24628	0.869109	0.426835	0.0547643
			lncRNA:CR43437	0	0	0	0	0	0	0			unk	4.04992	0.510834	0.953517	0.662878	0.473327	0.686466	0.609073			Cyp6a21	0	0	0	0	0	0	0			CG34136	12.059	0.682136	1.3954	0.536782	0.595039	0.30613	0.150052			CG32647	13.2773	0.514794	0.510004	1.07791	0.270851	0.436648
			CG43449	0	0	0	0	0	0	0			lncRNA:CR45883	0.0223388	0.187092	0.459422	0.0507091	0.0856534	0.0624816	0.0312767			eEF2	32.6062	0.153804	0.310959	0.585369	0.568373	0.998254	0.0711455			CG14818	14.7635	0.411786	0.514286	0.799945	0.424307	0.827703	0.154729			cib	10.732	0.772924	0.74316	1.13318	0.337683	0.312974
			tay	8.04659	0.438416	0.619854	0.773927	0.499641	0.186366	0.362279			CG43077	0	0	0	0	0	0	0			Pen	0	0	0	0	0	0	0			CG33107	1.32663	0.86786	1.54082	0.583173	0.587651	0	0.364552			CG2865	11.2059	0.55105	0.525631	1.08874	0.360729	0.418875
			Alk	36.0904	0.10148	0.405861	0.555349	0.451653	0.715304	0.0362165			lncRNA:CR44118	0	0	0	0	0	0	0			Oda	80.4633	0.139401	0.200683	0.712348	0.433113	0.982856	0.106193			GstT3	1.61116	0.736348	1.48162	0.538591	0.600113	0	0.208546			CG43850	1.41339	1.558	1.48104	1.0761	0.285467	0
			asRNA:CR45028	0	0	0	0	0	0	0			CG31028	0.0834807	0.162627	0.277069	0.0880448	0.0637866	0	0.0637211			Pkcdelta	0	0	0	0	0	0	0			cni	5.36729	0.595394	0.843299	0.647585	0.526699	0	0.208641			Prp4k	5.36574	0.747849	0.806081	1.03508	0.39704	0.160205
			CG43450	0	0	0	0	0	0	0			Tpl94D	0	0	0	0	0	0	0			esg	0	0	0	0	0	0	0			Sas10	0.656776	0.928537	2.88363	0.483013	0.6573	0	0.256962			udd	2.76995	0.914045	1.20107	0.88278	0.412364	0.050573
			lncRNA:CR43435	0	0	0	0	0	0	0			Mpc1	4.48142	0.516151	0.8841	0.664725	0.520292	0.561629	0.377445			lncRNA:CR46225	0.0064424	0.00152383	0.293611	0.000399228	0.0766045	0.0769004	2.74615e-06			Zip71B	3.29877	1.15278	2.32483	0.548163	0.600593	0	0.417989			CG42855	1.89794	1.57678	1.41495	1.20679	0.309762	0.0450859
			lncRNA:CR45025	0	0	0	0	0	0	0			lncRNA:CR44344	0.0174308	0.0751854	0.191901	0.024487	0.0434507	0.0624961	0.0118705			lncRNA:CR46114	0.0064424	0.00152383	0.293611	0.000399228	0.0766045	0.0769004	2.74615e-06			CG14696	0.783513	0.993937	2.49203	0.524316	0.625387	0	0.353603			ths	10.5664	0.544368	0.571377	1.11341	0.345943	0.292014
			CG43446	0	0	0	0	0	0	0			RpL39	90.4262	0.209437	0.238447	0.82169	0.432523	0.947742	0.173837			asRNA:CR46099	0	0	0	0	0	0	0			Ugt302K1	0.892702	0.904561	2.33966	0.45976	0.65443	0	0.223599			CG15431	10.3865	0.608819	0.611751	0.994518	0.352917	0.446221
			lncRNA:CR43456	0	0	0	0	0	0	0			conv	0.00746329	0.0162869	0.220863	0.00460887	0.058826	0	0.000428521			lncRNA:CR46393	0	0	0	0	0	0	0			CG1265	1.93441	0.79037	1.4437	0.55848	0.597329	0	0.280727			Fur1	7.6253	0.704426	0.95863	1.07144	0.405543	0.194417
			asRNA:CR43478	0	0	0	0	0	0	0			l(2)37Cc	6.18637	0.519615	0.807149	0.609262	0.490648	0.686485	0.395515			sisRNA:3	0	0	0	0	0	0	0			mt:ND1	64.6205	0.569144	0.394033	2.25759	0.449024	0.644982	3.8697			Nrg	15.0533	0.526085	0.508484	1.34299	0.282304	0.368336
			snoRNA:CG43051-a	0	0	0	0	0	0	0			CheB53a	0.00610112	0.0122235	0.220387	0.00346647	0.0597356	0.0624961	0.000240154			lncRNA:CR46100	0	0	0	0	0	0	0			Sem1	7.69059	0.443508	0.661969	0.737632	0.479343	0.301375	0.162416			pod1	2.93554	0.822767	1.33086	0.83367	0.463811	0.118236
			lncRNA:CR43455	0	0	0	0	0	0	0			jdp	120.055	0.373926	0.844489	1.01335	0.365557	0.727567	0.497842			asRNA:CR46101	0	0	0	0	0	0	0			mRpL18	1.51482	0.832837	1.69337	0.461647	0.645813	0	0.178985			Xe7	23.5364	0.410729	0.364876	1.16604	0.279308	0.593746
			lncRNA:CR43457	0	0	0	0	0	0	0			lncRNA:CR45998	0	0	0	0	0	0	0			stw	0	0	0	0	0	0	0			CG34229	1.65337	1.0891	1.60947	0.82031	0.560686	0	1.03855			VAChT	32.2625	0.725871	0.697793	1.3246	0.291124	0.277622
			CR45033	0	0	0	0	0	0	0			lncRNA:CR45997	0	0	0	0	0	0	0			AdamTS-A	0	0	0	0	0	0	0			CG5862	4.01571	0.593502	0.965132	0.720064	0.509277	0	0.289205			Pp2B-14D	12.709	0.528838	0.525555	1.093	0.323382	0.422366
			lncRNA:CR45031	0	0	0	0	0	0	0			CG31253	0	0	0	0	0	0	0			lncRNA:CR46351	0	0	0	0	0	0	0			Cyp4g15	29.7596	0.351789	0.593974	1.147	0.38496	0.714512	0.369974			Fili	6.5461	0.897635	0.836574	1.36512	0.243154	0.186547
			CG43448	0	0	0	0	0	0	0			lncRNA:CR44100	0	0	0	0	0	0	0			asRNA:CR46354	0	0	0	0	0	0	0			Nop56	1.03143	0.973234	1.68744	0.536959	0.614803	0	0.368221			sky	39.9691	0.386588	0.29931	1.43634	0.25185	0.487645
			CG43445	0	0	0	0	0	0	0			CG31259	0	0	0	0	0	0	0			CG46395	0	0	0	0	0	0	0			CG3337	3.21598	0.60915	1.07397	0.671302	0.550104	0	0.282927			RhoGAP71E	21.853	0.435832	0.417428	1.23933	0.30283	0.481757
			wrd	6.45062	0.489513	0.885164	0.714638	0.561065	0.36979	0.366579			Mpcp2	66.5109	0.192719	0.25152	0.883652	0.390825	0.954398	0.189686			lncRNA:CR46352	0	0	0	0	0	0	0			eca	7.75923	0.584255	0.665428	0.746008	0.499262	0.643842	0.31729			stv	23.045	0.610067	0.471518	1.50723	0.266089	0.439788
			CG43400	0	0	0	0	0	0	0			lncRNA:CR46000	0	0	0	0	0	0	0			shps	0	0	0	0	0	0	0			bwa	1.3237	0.9801	2.48891	0.522177	0.616462	0	0.306342			Syx1A	190.448	0.287405	0.196608	1.52605	0.206188	0.454087
			Parp	32.1735	0.28793	0.337124	0.923127	0.357276	0.822557	0.27233			lncRNA:CR44360	0.00746329	0.0162869	0.220863	0.00460887	0.058826	0	0.000428521			hll	0	0	0	0	0	0	0			RabGGTb	16.3726	0.591463	0.629952	0.77736	0.479513	0.874464	0.36866			CG43759	12.4912	0.884892	1.01394	1.50449	0.228242	0.218315
			lncRNA:CR44442	0.00937417	0.00235443	0.441726	0.000666257	0.124468	0	6.13541e-06			Frq2	2.93196	0.382982	1.31211	0.544671	0.379953	0.374352	0.221154			ich	0	0	0	0	0	0	0			CG31937	3.99394	0.641467	0.924027	0.629435	0.55136	0	0.260238			Sytbeta	11.3981	0.930384	0.690251	1.34224	0.256144	0.145373
			lncRNA:CR43451	0	0	0	0	0	0	0			pre-mod(mdg4)-O	0	0	0	0	0	0	0			vrs	0	0	0	0	0	0	0			Hel89B	0.65781	0.914095	2.38344	0.392623	0.694755	0	0.142224			Dmtn	7.35115	0.611939	0.704324	1.02393	0.346536	0.20052
			lncRNA:CR43453	0	0	0	0	0	0	0			lncRNA:CR45983	0	0	0	0	0	0	0			lncRNA:CR46103	0	0	0	0	0	0	0			CG12768	3.53135	1.08787	1.06562	0.773336	0.527625	0	0.960165			Mef2	10.1682	0.577889	0.627565	1.08175	0.380766	0.282768
			lncRNA:CR43424	0	0	0	0	0	0	0			lncRNA:CR45977	0	0	0	0	0	0	0			sisRNA:CR46364	0	0	0	0	0	0	0			cno	0.665901	0.830051	2.18978	0.44263	0.66653	0	0.177609			CG34200	24.8236	0.394709	0.385966	1.195	0.337134	0.543394
			lncRNA:CR45040	0	0	0	0	0	0	0			Trf2	11.0197	0.300838	0.512504	0.599597	0.562025	0.987422	0.208302			lncRNA:CR46102	0	0	0	0	0	0	0			ced-6	22.9512	0.426197	0.588842	0.983042	0.40377	0.463234	0.324569			CG33543	24.8211	0.54363	0.50389	1.30918	0.326244	0.410922
			lncRNA:CR43452	0	0	0	0	0	0	0			lncRNA:CR45982	0	0	0	0	0	0	0			BaraA2	0	0	0	0	0	0	0			CG2076	7.32725	0.509315	0.769851	0.655322	0.516816	0.30613	0.160323			CARPB	11.7349	0.953464	0.828437	1.32916	0.274344	0.225434
			schlank	15.7875	0.312252	0.480992	0.824099	0.398794	0.642378	0.242562			nSyb	100.008	-0.22136	0.619335	1.04801	0.272581	0.743698	-0.509959			lncRNA:CR46349	0	0	0	0	0	0	0			Ilk	2.97112	0.836747	1.09863	0.696862	0.532062	0	0.49068			Con	35.5711	0.438806	0.431292	1.33366	0.304614	0.479757
			asRNA:CR43454	0	0	0	0	0	0	0			larp	4.15541	0.439125	0.88178	0.575026	0.563284	0.686466	0.30076			CG46399	0	0	0	0	0	0	0			bigmax	2.3551	0.686	1.25659	0.555107	0.596951	0	0.223483			Fak	7.57022	0.627881	0.700651	1.00565	0.393228	0.239806
			RpS16	47.4341	0.151379	0.307019	0.513216	0.583674	0.901434	0.0721456			CG6330	8.05596	0.522121	0.97108	0.513242	0.525107	0.624061	0.278874			Pgm2a	1.8538	0.432917	1.33009	0.335411	0.675692	0.537558	0.146613			Xbp1	20.7773	0.352911	0.462395	0.847432	0.410711	0.797276	0.142665			CG45263	65.2217	0.496306	0.393024	1.303	0.297603	0.570493
			CG43401	0	0	0	0	0	0	0			CG43071	0.01476	0.0373737	0.44125	0.0105835	0.116569	0.124995	0.00127821			FBgn0286778-1	0	0	0	0	0	0	0			EMC6	12.4264	0.464647	0.547564	0.754741	0.474223	0.880605	0.225031			Ten-a	145.046	0.301219	0.2144	1.63354	0.213006	0.456076
			lncRNA:CR45030	0	0	0	0	0	0	0			CG31327	0	0	0	0	0	0	0			Orc1	0	0	0	0	0	0	0			Rab6	3.49383	0.739785	0.953613	0.765481	0.511613	0	0.522239			cindr	78.421	0.355523	0.25067	1.47981	0.254098	0.476506
			asRNA:CR45046	0	0	0	0	0	0	0			CG31326	0	0	0	0	0	0	0			sisRNA:CR46360	0	0	0	0	0	0	0			CG5969	2.0468	0.793054	1.37118	0.51976	0.614859	0	0.254618			pcs	21.5515	0.413007	0.395056	1.15917	0.300221	0.596764
			lncRNA:CR45039	0	0	0	0	0	0	0			CheB74a	0	0	0	0	0	0	0			lncRNA:CR46153	0	0	0	0	0	0	0			CG11790	16.6255	0.680787	0.758681	0.813395	0.479757	0.571181	0.499404			CG14441	3.62233	0.851019	1.13668	0.926589	0.40621	0.157773
			asRNA:CR43730	0.332977	0.768213	1.53764	0.374113	0.324443	0.0624704	0.400188			lncRNA:CR45978	0	0	0	0	0	0	0			CG46385	0	0	0	0	0	0	0			Ect3	18.423	1.23704	1.94683	0.814739	0.565054	0.140322	1.34063			CG11360	16.4494	0.694195	0.479307	1.74609	0.122703	0.281983
			lncRNA:CR44760	0	0	0	0	0	0	0			CheB53b	0	0	0	0	0	0	0			asRNA:CR46105	0	0	0	0	0	0	0			trol	27.2405	1.05771	0.904868	0.991223	0.440561	0.555226	1.25519			CG34355	23.2793	0.796732	0.802533	1.85068	0.182828	0.117649
			lncRNA:CR45047	0	0	0	0	0	0	0			tRNA:Thr-AGT-1-4	0	0	0	0	0	0	0			CG46387	0	0	0	0	0	0	0			l(2)k14505	3.35144	0.84183	1.07368	0.682132	0.559341	0	0.566582			da	11.7268	0.524996	0.507287	1.06976	0.353798	0.42918
			CG44005	0	0	0	0	0	0	0			CG31294	0	0	0	0	0	0	0			fs(1)h	24.1142	0.160526	0.311023	0.510053	0.614493	0.998254	0.0872155			COX5A	54.7084	0.290987	0.312018	1.00341	0.36787	0.70998	0.180553			mt:CoIII	368.395	0.256497	0.168528	1.66064	0.179224	0.410879
			lncRNA:CR44655	0.034903	0.0853846	0.34894	0.0305578	0.100859	0	0.00797013			inaF-D	0.023038	0.0785231	0.418596	0.0243723	0.105861	0.0624961	0.00898769			CR46160	0	0	0	0	0	0	0			Atg9	1.65484	0.920902	2.13937	0.419454	0.67503	0	0.162521			PRL-1	4.06892	1.12449	1.0732	1.24993	0.282307	0.123516
			lncRNA:CR44885	0	0	0	0	0	0	0			verm	0	0	0	0	0	0	0			lncRNA:CR46391	0	0	0	0	0	0	0			mxt	6.38341	0.483417	0.711091	0.652732	0.517013	0.324661	0.154639			AP-1gamma	15.7489	0.465969	0.449927	1.14869	0.355834	0.488961
			lncRNA:CR44758	0	0	0	0	0	0	0			CG31296	0	0	0	0	0	0	0			lncRNA:CR46060	0.0121329	0.00152383	0.293611	0.000399228	0.0766045	0.0769004	2.74615e-06			CG42271	2.89567	0.555586	1.07867	0.549169	0.586047	0	0.129003			Snx27	5.76079	1.01129	0.832566	1.53576	0.245177	0.0969318
			lncRNA:CR45038	0	0	0	0	0	0	0			lncRNA:CR45984	0	0	0	0	0	0	0			asRNA:CR46096	0.0064424	0.00152383	0.293611	0.000399228	0.0766045	0.0769004	2.74615e-06			Wwox	4.04321	0.530529	1.18032	0.714067	0.548491	0	0.261589			nej	11.0265	0.774742	0.551652	1.58189	0.26385	0.300123
			Nha2	0.0507122	0.273534	1.04665	0.0811459	0.241249	0	0.0464281			CG11537	7.7703	0.506989	0.705982	0.663743	0.438706	0.791912	0.439362			Spred	16.5287	0.184439	0.429354	0.449676	0.510732	0.998254	0.0439298			Spt3	1.00032	0.984791	1.96371	0.434396	0.67281	0	0.254977			CG12991	17.0525	0.644939	0.424225	1.64819	0.205401	0.436147
			nocte	14.8716	0.310014	0.489705	0.932259	0.345094	0.53134	0.33357			tRNA:Phe-GAA-1-7	0	0	0	0	0	0	0			lncRNA:CR46098	0	0	0	0	0	0	0			Asap	1.28823	0.859436	1.57043	0.502524	0.633254	0	0.285381			Mhcl	3.902	1.09774	0.971696	1.30209	0.339952	0.0678666
			CG43397	0	0	0	0	0	0	0			PCB	1.41841	0.76046	1.54252	0.482621	0.504056	0.499247	0.335753			CG2519	1.79071	0.486178	1.62763	0.298897	0.633404	0.614457	0.177686			CG6357	46.3085	0.56915	0.64822	0.792062	0.458745	0.771548	0.282186			sgg	48.1769	0.319298	0.290585	1.19809	0.27541	0.565916
			lncRNA:CR44759	0	0	0	0	0	0	0			lncRNA:CR45939	0.00881429	0.0122235	0.220387	0.00346647	0.0597356	0.0624961	0.000240154			lncRNA:CR46156	0	0	0	0	0	0	0			lawc	8.91447	0.434841	0.649332	0.721867	0.488664	0.639323	0.171193			vas	0.141476	1.00736	1.99919	0.341212	0.382958	0
			CG42673	8.66303	0.443859	1.04457	0.585448	0.443384	0.227841	0.317025			CG44335	0	0	0	0	0	0	0			lncRNA:CR46108	0	0	0	0	0	0	0			CG9896	3.1126	0.556082	1.11873	0.557716	0.592616	0	0.158826			Fas2	28.0825	0.802175	0.563272	1.78134	0.127279	0.253058
			asRNA:CR44599	0.00903153	0.090594	0.220863	0.0256363	0.0426046	0	0.015077			Ccdc56	0	0	0	0	0	0	0			MESK2	38.1362	0.182242	0.286777	0.662639	0.45822	0.987603	0.156197			Tsp42Ef	9.04002	0.496755	0.783007	0.636387	0.527582	0.230589	0.145675			Larp4B	24.6543	0.368737	0.367154	1.12322	0.352678	0.60593
			Task6	11.9256	0.366239	0.661168	0.868776	0.332078	0.481081	0.361415			CG9067	2.71703	0.641384	1.08874	0.492263	0.531189	0.561622	0.517778			lncRNA:CR46148	0	0	0	0	0	0	0			COX6B	74.9776	0.311946	0.298508	1.2728	0.437718	0.613043	0.452841			SKIP	10.0583	1.07898	0.678709	1.80998	0.182926	0.151195
			lncRNA:CR43415	0	0	0	0	0	0	0			Rop	23.5465	0.115805	0.445016	0.692283	0.412314	0.872304	0.081427			CR46159	0	0	0	0	0	0	0			CG8617	1.22418	0.685311	1.66003	0.490071	0.635639	0	0.178713			CG42260	34.5691	0.354106	0.315382	1.19606	0.303276	0.604684
			lncRNA:CR43416	0	0	0	0	0	0	0			lncRNA:CR44379	0	0	0	0	0	0	0			asRNA:CR46109	0	0	0	0	0	0	0			fbl	1.33068	0.676213	1.59774	0.455473	0.65057	0	0.12434			CG9005	17.9447	0.663568	0.422892	1.75757	0.196866	0.368842
			lncRNA:CR45037	0	0	0	0	0	0	0			CG31321	0	0	0	0	0	0	0			lncRNA:CR44781	0	0	0	0	0	0	0			Lsm10	0.446696	1.00116	2.72534	0.460843	0.675418	0	0.338719			AMPdeam	20.6144	0.577895	0.422641	1.53012	0.21184	0.401138
			lncRNA:CR43417	0	0	0	0	0	0	0			pre-mod(mdg4)-G	0	0	0	0	0	0	0			Gbeta13F	66.4793	0.145508	0.20975	0.678319	0.480859	0.998254	0.135772			Syx17	2.23454	0.614146	1.22117	0.588897	0.591513	0	0.251536			DIP-delta	19.2421	0.82092	0.731664	1.40819	0.261859	0.29568
			lncRNA:CR45043	0	0	0	0	0	0	0			lncRNA:CR44371	0	0	0	0	0	0	0			lncRNA:CR46106	0	0	0	0	0	0	0			mora	0.894333	0.853853	1.9586	0.411268	0.684806	0	0.178038			Trl	0.96555	1.68942	2.14956	1.02645	0.394557	0.0450859
			CG15431	13.425	0.394645	0.544136	0.989055	0.46658	0.581269	0.567901			CG42634	0	0	0	0	0	0	0			mub	66.2359	0.127094	0.262548	0.62772	0.434609	0.997936	0.0834672			GstE6	17.0942	0.610418	0.7714	0.664584	0.545367	0.931356	0.287163			CG13739	53.278	0.927795	0.776652	1.49202	0.204008	0.364362
			lncRNA:CR43857	0.0544725	0.215801	0.504738	0.0810974	0.124979	0	0.0395325			lncRNA:CR44369	0	0	0	0	0	0	0			PPO1	0.0119974	0.0309541	0.271832	0.00875941	0.0699492	0.0769217	0.0012776			CG3652	4.05125	0.537751	0.904315	0.648146	0.542895	0	0.221804			CG18467	5.87091	0.981931	1.13971	1.29681	0.314399	0.0507183
			lncRNA:CR43432	0	0	0	0	0	0	0			CheA86a	0	0	0	0	0	0	0			asRNA:CR46089	0	0	0	0	0	0	0			Scsalpha1	17.4037	0.407225	0.493492	1.12847	0.50145	0.66241	0.633205			LPCAT	2.06788	1.31901	1.37985	1.10123	0.406099	0.0450859
			snoRNA:abba-a	0	0	0	0	0	0	0			lncRNA:CR45981	0	0	0	0	0	0	0			lncRNA:CR44679	0.0199966	0.119318	0.543663	0.0337646	0.127398	0	0.014993			CG32706	1.53371	0.727173	1.7012	0.494965	0.633954	0	0.197945			FBXO11	5.46279	0.835575	0.755186	1.25773	0.279726	0.178331
			asRNA:CR43430	0	0	0	0	0	0	0			lncRNA:CR44333	0	0	0	0	0	0	0			asRNA:CR46097	0	0	0	0	0	0	0			CG10863	46.2491	0.380173	0.50786	0.86888	0.429846	0.851404	0.204849			Ca-Ma2d	11.5403	0.585445	0.583615	1.14331	0.24627	0.314104
			scaRNA:MeU2-48	0	0	0	0	0	0	0			CG44362	0	0	0	0	0	0	0			CR46155	0	0	0	0	0	0	0			RpL23A	76.9829	0.279173	0.292587	0.982132	0.360195	0.718704	0.155635			DIP2	4.19373	0.842254	0.930131	1.03996	0.369009	0.144945
			lncRNA:CR45018	0.0425563	0.194139	0.823782	0.0659921	0.199079	0	0.0397492			CR31292	0	0	0	0	0	0	0			CR46170	0	0	0	0	0	0	0			Prx6005	1.57212	0.746234	1.40814	0.534692	0.616194	0	0.25605			luna	39.9985	0.946482	0.743101	1.68855	0.209768	0.317884
			snoRNA:SC35-b	0	0	0	0	0	0	0			CG42635	0	0	0	0	0	0	0			lncRNA:CR44655	0.0227567	0.119318	0.543663	0.0337646	0.127398	0	0.014993			Cyp1	158.169	0.227044	0.240825	1.19205	0.312738	0.709215	0.181827			S	9.25002	0.69391	0.599197	1.34084	0.290062	0.204682
			Ten-a	153.204	0.191555	0.248564	1.1988	0.281227	0.634961	0.221042			CG42637	0	0	0	0	0	0	0			Srp54	3.78755	0.434757	0.846057	0.420501	0.58367	0.844881	0.296422			Serinc	9.21942	0.427251	0.629891	0.733017	0.48716	0.553168	0.1828			rhea	4.65971	0.952652	0.919252	1.36268	0.264635	0.134032
			snoRNA:lola-a	0	0	0	0	0	0	0			lncRNA:CR45980	0	0	0	0	0	0	0			lncRNA:CR46112	0	0	0	0	0	0	0			CG1907	10.1285	0.404643	0.595155	0.683722	0.495293	0.864584	0.1253			5-HT1B	7.55085	1.0667	1.04582	1.39667	0.293347	0.170261
			snoRNA:Tudor-SN-a	0	0	0	0	0	0	0			Sfp78E	0	0	0	0	0	0	0			lncRNA:CR46110	0	0	0	0	0	0	0			CG33096	0.463789	0.917379	3.11925	0.393895	0.707503	0	0.195026			CG8768	1.86308	1.39338	1.69094	1.17316	0.370904	0.0450859
			snoRNA:lola-c	0.00748382	0.000426933	0.220863	0.000120814	0.0624036	0	2.8619e-07			snoRNA:83E4-5	0	0	0	0	0	0	0			RhoGAP19D	13.3547	0.235199	0.430507	0.472378	0.553101	0.998254	0.1177			UQCR-14	47.9321	0.328523	0.374256	1.04115	0.446599	0.656382	0.298527			Dsp1	47.2501	0.459915	0.272129	1.83142	0.145079	0.345429
			Cam	568.267	0.113495	0.136329	1.25813	0.283565	0.665904	0.151779			lncRNA:CR44365	0	0	0	0	0	0	0			CR46171	0	0	0	0	0	0	0			RpS12	93.3328	0.322028	0.298623	0.953622	0.391316	0.871294	0.208952			CR32745	0.522957	1.7167	1.8854	0.897339	0.311871	0
			lncRNA:CR45021	0	0	0	0	0	0	0			pre-mod(mdg4)-H	0	0	0	0	0	0	0			ctp	157.017	0.107135	0.154205	0.791946	0.409602	0.970822	0.12381			CHKov2	2.10002	0.589735	1.17594	0.505319	0.621532	0	0.154529			CG15803	2.96366	0.960658	1.22969	0.889315	0.392213	0.0596064
			lncRNA:CR44464	0.00477573	0.000426933	0.220863	0.000120814	0.0624036	0	2.8619e-07			CG4957	2.10363	0.489746	1.35485	0.450528	0.585256	0.499247	0.254683			CR46172	0	0	0	0	0	0	0			CG32262	0.585464	0.96001	2.56857	0.369643	0.715518	0	0.169576			wdb	44.4452	0.438564	0.287719	1.7614	0.180784	0.426155
			Dab	8.3489	0.454608	0.677126	0.847039	0.473658	0.28408	0.532059			lncRNA:CR44354	0	0	0	0	0	0	0			lncRNA:CR46120	0	0	0	0	0	0	0			meigo	2.57599	0.64594	1.19559	0.493113	0.626915	0	0.163863			Rala	5.2699	0.898818	0.905215	1.28083	0.287845	0.117574
			snoRNA:CG16892-a	0	0	0	0	0	0	0			asRNA:CR44367	0	0	0	0	0	0	0			lncRNA:CR46117	0	0	0	0	0	0	0			Rexo5	0.4626	0.918962	2.65576	0.349618	0.727836	0	0.140636			CG5065	37.779	0.310836	0.324009	1.02914	0.37446	0.672207
			asRNA:CR45042	0	0	0	0	0	0	0			lncRNA:CR44097	0	0	0	0	0	0	0			lncRNA:CR46090	0	0	0	0	0	0	0			CG13384	2.25535	0.603343	1.28192	0.492144	0.627593	0	0.135833			NfI	8.05559	0.689333	0.576676	1.28714	0.269104	0.153863
			lncRNA:CR43490	0	0	0	0	0	0	0			Sfp96F	0	0	0	0	0	0	0			asRNA:CR46065	0	0	0	0	0	0	0			Surf4	4.83317	0.589467	0.898252	0.781672	0.557974	0	0.516272			CanA-14F	24.8924	0.5446	0.440349	1.39299	0.29607	0.437998
			lncRNA:CR43494	0	0	0	0	0	0	0			lncRNA:CR44361	0	0	0	0	0	0	0			CR46167	0	0	0	0	0	0	0			CG32032	37.6694	0.46191	0.56031	0.76258	0.465405	0.889874	0.193328			MESR4	3.59679	1.02942	0.935698	1.15627	0.346083	0.0846464
			lncRNA:CR44457	0.00477573	0.000426933	0.220863	0.000120814	0.0624036	0	2.8619e-07			CG44355	0	0	0	0	0	0	0			lncRNA:CR46111	0	0	0	0	0	0	0			lili	0.734582	1.0844	2.57721	0.45873	0.662515	0	0.360411			Eph	12.5046	0.40664	0.499245	0.879731	0.446859	0.462142
			lncRNA:CR45020	0	0	0	0	0	0	0			CheA84a	0	0	0	0	0	0	0			CR46166	0	0	0	0	0	0	0			CG11686	3.48253	0.604175	1.22505	0.692399	0.564387	0	0.376568			lncRNA:alphagamma-element:CR32865	37.5189	1.95675	1.94243	1.07592	0.29368	0.399059
			lncRNA:CR43607	0	0	0	0	0	0	0			Vha16-4	0	0	0	0	0	0	0			lncRNA:CR46116	0	0	0	0	0	0	0			CG12730	30.9144	0.377127	0.645693	1.29029	0.426403	0.270917	0.681458			tay	9.11965	0.734695	0.579126	1.31695	0.296916	0.284796
			snoRNA:kis-a	0	0	0	0	0	0	0			lncRNA:CR44105	0	0	0	0	0	0	0			CR46161	0	0	0	0	0	0	0			Kap-alpha3	10.1534	0.384392	0.561745	0.772462	0.496852	0.743382	0.206538			Gug	20.8906	0.508767	0.387768	1.46864	0.255838	0.481373
			lncRNA:CR43626	0	0	0	0	0	0	0			CG42598	0	0	0	0	0	0	0			lncRNA:CR46062	0	0	0	0	0	0	0			CG17272	2.89268	0.581412	1.22587	0.493735	0.62334	0	0.11963			NetB	6.78442	0.928123	1.06037	1.16025	0.298937	0.145408
			mt:lrRNA	165.404	0.278438	0.29469	1.05559	0.357958	0.716649	0.524844			asRNA:CR44375	0	0	0	0	0	0	0			CR46157	0	0	0	0	0	0	0			CG4953	0.515066	0.950768	3.09503	0.427651	0.690846	0	0.254083			fred	11.6251	0.759557	0.747602	1.37115	0.275161	0.304136
			scaRNA:PsiU2-38.40.42	0	0	0	0	0	0	0			tRNA:Gly-TCC-1-4	0	0	0	0	0	0	0			CR46173	0	0	0	0	0	0	0			CG10433	138.074	0.468076	0.541069	0.939428	0.509736	0.844212	0.397862			Trpm	4.13042	1.05702	1.17454	1.04888	0.40621	0.14788
			snoRNA:lola-d	0	0	0	0	0	0	0			lncRNA:CR44376	0	0	0	0	0	0	0			CR46165	0	0	0	0	0	0	0			Vha13	50.0243	0.314686	0.363258	0.889435	0.411518	0.839688	0.184243			CG34357	2.7051	0.825302	1.25384	0.7892	0.446334	0.0433608
			snoRNA:Edc3-a	0	0	0	0	0	0	0			asRNA:CR44372	0	0	0	0	0	0	0			CR46169	0	0	0	0	0	0	0			CG13197	1.1984	0.781646	1.67443	0.441196	0.667992	0	0.195733			CG45050	51.928	0.401674	0.271841	1.72777	0.220787	0.422414
			lncRNA:CR43491	0	0	0	0	0	0	0			asRNA:CR44358	0	0	0	0	0	0	0			lncRNA:CR46087	0	0	0	0	0	0	0			CG4042	2.06442	0.636185	1.30591	0.466143	0.644393	0	0.141924			lncRNA:CR44320	2.68121	1.04132	1.76463	0.993296	0.418501	0.0539059
			snoRNA:CG32479-b	0	0	0	0	0	0	0			CR44383	0	0	0	0	0	0	0			CR46163	0	0	0	0	0	0	0			AnxB10	14.5028	0.397149	0.565127	0.666079	0.508989	0.879877	0.130512			CG45002	11.4756	0.639451	0.718363	1.502	0.274408	0.163118
			lncRNA:CR43488	0	0	0	0	0	0	0			Sfp36F	0	0	0	0	0	0	0			CR46168	0	0	0	0	0	0	0			Sf3b6	5.4112	0.438984	0.753942	0.595384	0.554173	0	0.116108			Fur2	4.50331	0.897367	0.915264	1.12849	0.313491	0.127946
			Acp98AB	0	0	0	0	0	0	0			Sfp93F	0	0	0	0	0	0	0			lncRNA:CR46063	0	0	0	0	0	0	0			Mob2	22.1121	0.329982	0.407215	0.796466	0.442619	0.780127	0.143293			MESK2	57.7773	0.277944	0.27331	1.09138	0.361705	0.629156
			lncRNA:CR43421	0	0	0	0	0	0	0			Trpml	0	0	0	0	0	0	0			lncRNA:CR46118	0	0	0	0	0	0	0			Pect	10.2421	0.476449	0.645297	1.08752	0.531662	0.343423	0.711032			ssp3	3.28505	1.00491	1.14759	1.13078	0.345102	0.121849
			lncRNA:CR43606	0	0	0	0	0	0	0			asRNA:CR44235	0	0	0	0	0	0	0			CR46162	0	0	0	0	0	0	0			Sps2	1.93629	0.676521	1.25645	0.491005	0.634335	0	0.197109			scyl	30.551	0.551972	0.369784	1.51135	0.257898	0.48003
			lncRNA:CR45006	0	0	0	0	0	0	0			lncRNA:CR44373	0	0	0	0	0	0	0			lncRNA:CR44786	0	0	0	0	0	0	0			CG8206	3.96651	0.484189	0.995564	0.632704	0.571727	0	0.21456			Sdc	78.1209	0.264857	0.241872	1.17657	0.344792	0.592444
			CG45011	0	0	0	0	0	0	0			Sfp38D	0	0	0	0	0	0	0			lncRNA:CR44775	0	0	0	0	0	0	0			wrd	1.39699	0.72253	1.59362	0.480286	0.647604	0	0.205781			unk	8.08989	0.662142	0.599126	1.19465	0.332595	0.249299
			asRNA:CR45016	0	0	0	0	0	0	0			moi	0	0	0	0	0	0	0			CR46174	0	0	0	0	0	0	0			CG32196	1.82234	0.728549	1.27344	0.649562	0.590959	0	0.468671			Rdl	192.625	0.209637	0.18058	1.28125	0.323442	0.588865
			CG45012	0	0	0	0	0	0	0			CG42597	0	0	0	0	0	0	0			CR46164	0	0	0	0	0	0	0			Rab7	12.9311	0.365779	0.497955	0.806216	0.488795	0.724288	0.224668			Sirup	13.4106	0.449882	0.555293	0.910735	0.390144	0.420574
			lncRNA:CR43627	0	0	0	0	0	0	0			lncRNA:CR46002	0	0	0	0	0	0	0			eIF4A	94.7271	0.144657	0.189026	0.680327	0.381909	0.935374	0.154548			CG2921	1.35374	0.707591	1.57376	0.445646	0.662447	0	0.166816			CG34423	0.818133	2.27892	1.61402	1.37583	0.189229	0
			Plc21C	18.7919	0.520443	0.5321	0.97281	0.370536	0.582573	0.872333			lncRNA:CR44091	0	0	0	0	0	0	0			lncRNA:CR44783	0	0	0	0	0	0	0			CG10208	2.34483	0.716073	1.58882	0.419568	0.675993	0	0.136871			CG14234	1.98089	1.18756	1.48217	0.929619	0.406398	0.0450859
			CG32485	6.6342	0.382672	0.810625	0.783998	0.411696	0.185671	0.378511			lncRNA:CR45942	0.0107625	0.106433	0.238559	0.0278843	0.0409681	0.0624816	0.0195234			lncRNA:CR46235	0.00832053	0.0200454	0.271832	0.00567245	0.0724012	0	0.00052741			RpL38	196.635	0.24882	0.265623	1.0021	0.320926	0.767206	0.11666			e(y)3	3.15077	0.909189	1.22204	0.940507	0.423415	0.102473
			scaRNA:PsiU1-6	0	0	0	0	0	0	0			asRNA:CR44374	0	0	0	0	0	0	0			lncRNA:CR44788	0	0	0	0	0	0	0			Rab2	9.03413	0.42373	0.610181	0.813977	0.522574	0.644981	0.343254			Sumo	55.2678	0.278803	0.278844	0.98084	0.380425	0.688312
			lncRNA:CR45022	0	0	0	0	0	0	0			Cad86C	0	0	0	0	0	0	0			CR46175	0	0	0	0	0	0	0			RpS14b	14.1158	0.358088	0.532534	0.689905	0.492065	0.832426	0.109878			Slik	2.60341	0.985155	1.17389	1.03291	0.390349	0.0512228
			lncRNA:CR45023	0	0	0	0	0	0	0			Sfp26Ad	0	0	0	0	0	0	0			CR46150	0	0	0	0	0	0	0			CG3281	0.306852	0.923285	3.2928	0.315902	0.75422	0	0.127916			Ank2	42.489	0.472426	0.331192	1.67373	0.249836	0.43552
			CG43610	0	0	0	0	0	0	0			lncRNA:CR44380	0	0	0	0	0	0	0			CR46152	0	0	0	0	0	0	0			HINT1	27.6559	0.296071	0.48174	0.827427	0.470398	0.748258	0.14181			spen	118.665	0.320572	0.193688	1.75485	0.176786	0.405334
			lncRNA:CR44762	0	0	0	0	0	0	0			CG31286	0	0	0	0	0	0	0			CR46154	0	0	0	0	0	0	0			Sgt	5.40659	0.653707	0.856222	0.663605	0.558677	0	0.405178			sfl	6.9054	0.802161	0.712386	1.27128	0.258132	0.165187
			lncRNA:CR43621	0	0	0	0	0	0	0			CG44090	0	0	0	0	0	0	0			CR46151	0	0	0	0	0	0	0			Moe	16.8788	0.364612	0.570894	0.706775	0.498397	0.791087	0.128928			tau	16.5109	0.543266	0.455145	1.32957	0.292764	0.409881
			asRNA:CR45008	0	0	0	0	0	0	0			CR43080	0	0	0	0	0	0	0			lncRNA:CR44787	0	0	0	0	0	0	0			Myd88	2.76872	0.949929	1.1489	0.644665	0.588994	0	0.6912			Pkn	4.54647	0.923699	0.958445	1.12329	0.354454	0.123596
			lncRNA:CR43620	0	0	0	0	0	0	0			Snoo	3.99144	0.401526	0.812197	0.513275	0.462614	0.686466	0.325303			CR46158	0	0	0	0	0	0	0			CG31974	23.8254	0.439624	0.646268	0.828053	0.501919	0.422335	0.233941			RpL29	146.45	0.313518	0.191955	1.75159	0.21618	0.426192
			lncRNA:CR43489	0	0	0	0	0	0	0			asRNA:CR45955	0	0	0	0	0	0	0			lncRNA:CR44789	0	0	0	0	0	0	0			CG7988	0.47979	0.753312	2.58514	0.382496	0.70677	0	0.135349			caz	2.843	0.523499	1.0603	0.545209	0.576476	0.106634
			lncRNA:CR43498	0	0	0	0	0	0	0			CG31751	7.21433	0.469375	0.829661	0.607725	0.435483	0.642575	0.312517			lncRNA:CR44782	0	0	0	0	0	0	0			Ptpa	1.29902	0.622274	1.54766	0.437034	0.668528	0	0.12777			nrm	10.955	0.818084	0.720454	1.1521	0.339432	0.395281
			lncRNA:CR43632	0	0	0	0	0	0	0			CR45932	0	0	0	0	0	0	0			lncRNA:CR46119	0	0	0	0	0	0	0			CG3860	2.62532	0.592625	1.27962	0.470035	0.646919	0	0.144374			CG16717	6.21269	0.656839	0.75069	1.0144	0.361373	0.163294
			CG43638	0	0	0	0	0	0	0			lncRNA:CR44096	0	0	0	0	0	0	0			asRNA:CR46091	0	0	0	0	0	0	0			CG9391	1.93925	0.756156	1.38755	0.493173	0.647382	0	0.278682			dati	31.4906	1.02628	1.07825	1.81967	0.253117	0.0970307
			lncRNA:CR43622	0	0	0	0	0	0	0			pre-mod(mdg4)-AA	0	0	0	0	0	0	0			lncRNA:CR46088	0	0	0	0	0	0	0			Phyhd1	34.9415	0.556108	0.687245	2.05569	0.543017	0.324662	3.36325			Rtf1	4.53442	0.851943	0.899419	0.983428	0.373126	0.157863
			Rab26	18.9908	0.380502	0.462281	0.80627	0.439723	0.640068	0.348799			CG42638	0	0	0	0	0	0	0			lncRNA:CR45442	0	0	0	0	0	0	0			zip	1.37318	0.784799	1.70611	0.602482	0.613019	0	0.473093			Bsg	87.7913	0.345731	0.232179	1.55582	0.179471	0.427899
			lncRNA:CR43420	0	0	0	0	0	0	0			CG1090	8.34832	0.0976647	0.89503	0.459478	0.441176	0.624087	0.0409936			lncRNA:CR45441	0	0	0	0	0	0	0			bsf	0.483756	0.999285	2.64638	0.532481	0.660017	0	0.55971			chrb	60.0748	0.383897	0.276169	1.48367	0.25146	0.483568
			lncRNA:CR43625	0	0	0	0	0	0	0			CR45931	0	0	0	0	0	0	0			lncRNA:CR45440	0	0	0	0	0	0	0			eIF3d1	4.91021	0.46618	0.867348	0.58037	0.578896	0	0.141539			bou	0.61818	1.56035	2.02912	0.84942	0.417157	0
			CG43630	0	0	0	0	0	0	0			CG5793	5.5391	0.580026	1.90385	0.381976	0.624019	0.589622	0.171169			asRNA:CR46068	0	0	0	0	0	0	0			KdelR	5.47468	0.442133	0.84752	0.579395	0.574435	0	0.129715			CG14995	5.03416	1.02173	0.865828	1.20127	0.354382	0.139626
			lncRNA:CR43487	0	0	0	0	0	0	0			CG43068	0	0	0	0	0	0	0			lncRNA:CR46086	0	0	0	0	0	0	0			slmo	1.86638	1.28593	1.64848	0.609735	0.613756	0	0.944392			CG6966	8.61208	0.741593	0.681306	1.21024	0.36139	0.223544
			asRNA:CR45001	0	0	0	0	0	0	0			CR45933	0	0	0	0	0	0	0			asRNA:CR46069	0	0	0	0	0	0	0			AlaRS	0.767953	0.749944	2.20511	0.347678	0.728395	0	0.103651			aop	12.5531	0.537338	0.507184	1.11563	0.334607	0.412103
			lncRNA:CR44756	0	0	0	0	0	0	0			lncRNA:CR43132	0	0	0	0	0	0	0			asRNA:CR46070	0	0	0	0	0	0	0			cbt	4.82519	1.30609	1.05514	0.792732	0.555935	0.324661	1.48414			CG43347	7.37208	0.640407	0.65569	1.14514	0.318707	0.136193
			lncRNA:CR43633	0	0	0	0	0	0	0			CG14207	7.18276	0.547395	0.709004	0.584974	0.379411	0.728719	0.494198			lncRNA:CR46083	0	0	0	0	0	0	0			Got1	53.0072	0.318039	0.532899	0.832165	0.457133	0.748911	0.12219			pxb	2.00215	1.17617	1.74982	0.937643	0.424824	0.0450859
			cbt	5.59515	0.556994	0.884646	0.920235	0.399838	0.185671	0.943444			asRNA:CR44108	0	0	0	0	0	0	0			lncRNA:CR44778	0	0	0	0	0	0	0			CG42390	1.02244	0.991045	2.66997	0.337586	0.737761	0	0.173307			corn	11.7917	0.58866	0.535246	1.1227	0.328285	0.38389
			snoRNA:CG32479-a	0	0	0	0	0	0	0			CG31524	0	0	0	0	0	0	0			Cmpk	22.3853	0.178464	0.419879	0.49549	0.558011	0.921729	0.0950279			RhoL	1.29973	0.656242	1.60891	0.445813	0.672637	0	0.187708			mt:ND4	55.2556	0.393088	0.327863	1.37994	0.235918	0.488578
			lncRNA:CR45003	0	0	0	0	0	0	0			CG31528	0	0	0	0	0	0	0			asRNA:CR46081	0	0	0	0	0	0	0			Wdfy2	4.42305	0.643586	0.924912	0.645969	0.560454	0	0.356858			Rgl	6.84938	0.653681	0.68844	1.12294	0.363717	0.207994
			snoRNA:hts-a	0	0	0	0	0	0	0			CG44088	0	0	0	0	0	0	0			lncRNA:CR44780	0	0	0	0	0	0	0			GlyS	5.83977	0.650981	0.989716	0.663387	0.560158	0.270741	0.397873			fra	2.64893	0.92597	1.08062	0.915168	0.394844	0.0315765
			lncRNA:CR43422	0	0	0	0	0	0	0			Pka-R2	26.1938	0.308053	0.723286	0.688528	0.468211	0.627375	0.231362			asRNA:CR46082	0	0	0	0	0	0	0			CG12123	0.794039	1.23364	2.34554	0.846634	0.615402	0	1.73931			CG43867	16.5686	0.451654	0.449428	1.1082	0.33623	0.452714
			Gdap2	22.3008	0.349868	0.435724	0.744947	0.45476	0.810105	0.246187			asRNA:CR44106	0	0	0	0	0	0	0			asRNA:CR46071	0	0	0	0	0	0	0			DNAlig1	0.317026	0.908883	3.17791	0.331707	0.746995	0	0.166431			Dgk	2.95004	0.924494	1.16649	0.877099	0.383858	0.0567513
			scaRNA:PsiU2-35.45	0	0	0	0	0	0	0			lncRNA:CR44349	0	0	0	0	0	0	0			lncRNA:CR46080	0	0	0	0	0	0	0			bmm	0.507313	0.856903	2.19332	0.387219	0.708619	0	0.21521			X11Lbeta	16.4724	0.580944	0.525987	1.24248	0.274282	0.414207
			lncRNA:CR45004	0	0	0	0	0	0	0			CG31516	0	0	0	0	0	0	0			lncRNA:CR46078	0	0	0	0	0	0	0			CG6066	0.314756	1.00588	3.19556	0.376806	0.721198	0	0.271279			drongo	9.66983	0.646411	0.59364	1.32092	0.345188	0.322153
			lncRNA:CR43418	0	0	0	0	0	0	0			lncRNA:CR45936	0	0	0	0	0	0	0			lncRNA:CR46079	0	0	0	0	0	0	0			CG15201	215.774	0.389876	0.480058	0.756348	0.512965	0.911726	0.204478			fwd	6.96478	0.42353	0.687121	0.654162	0.535647	0.316889
			snoRNA:lola-b	0	0	0	0	0	0	0			CG43082	0	0	0	0	0	0	0			lncRNA:CR44777	0	0	0	0	0	0	0			Dlip2	0.801273	0.729933	2.53593	0.363666	0.720788	0	0.107243			mspo	34.9746	0.425293	0.378889	1.30709	0.277051	0.52341
			CG9132	6.1846	0.467154	0.82577	0.817606	0.414838	0.240892	0.558948			CG6153	0.756351	0.65588	2.25848	0.306095	0.681972	0.436766	0.189051			CR46072	0	0	0	0	0	0	0			Ip259	17.6258	0.324389	0.454463	0.759265	0.480212	0.770976	0.143083			CG6923	0.953805	1.13736	2.02698	0.686039	0.520686	0.0450859
			lncRNA:CR43634	0	0	0	0	0	0	0			lncRNA:CR31526	0	0	0	0	0	0	0			lncRNA:CR46077	0	0	0	0	0	0	0			Calr	16.6418	0.318015	0.516171	0.73634	0.513795	0.769668	0.148929			Vps11	4.79808	0.691533	0.832	0.936508	0.386534	0.131725
			Ykt6	4.99105	0.526066	1.12541	0.637566	0.546259	0.185671	0.320729			lncRNA:CR45937	0	0	0	0	0	0	0			lncRNA:CR46075	0	0	0	0	0	0	0			Psi	1.03105	0.7589	1.97888	0.361971	0.718709	0	0.128248			CG10804	44.1132	0.400347	0.360456	1.31369	0.328476	0.466759
			snoRNA:CG31191-a	0	0	0	0	0	0	0			eIF3k	12.3185	0.269835	0.477728	0.531619	0.488747	0.900132	0.145275			lncRNA:CR46073	0	0	0	0	0	0	0			asRNA:CR45132	0.565374	0.897495	2.59264	0.378534	0.712469	0	0.212506			enc	14.6152	0.511108	0.532924	1.00464	0.330507	0.421062
			lncRNA:CR43495	0	0	0	0	0	0	0			CG31542	0	0	0	0	0	0	0			lncRNA:CR46076	0	0	0	0	0	0	0			CG5793	23.8025	0.323811	0.625658	0.702405	0.504739	0.815235	0.106059			sba	5.20421	0.654796	0.797766	0.872255	0.411366	0.205728
			CG9813	42.651	0.0857406	0.34487	0.519072	0.508549	0.836222	0.021408			CG31221	115.588	-0.11013	0.940305	0.81033	0.35893	0.764499	-0.27495			asRNA:CR46074	0	0	0	0	0	0	0			CG13369	2.61133	0.552017	1.10535	0.592064	0.604602	0	0.266139			cpx	301.461	0.201463	0.206441	1.00937	0.366361	0.673478
			lncRNA:CR44465	0	0	0	0	0	0	0			lncRNA:CR44089	0	0	0	0	0	0	0			Top3beta	2.59401	0.726766	1.16123	0.632656	0.487275	0.691287	0.341617			Ack	0.78842	0.700363	2.40969	0.373845	0.716469	0	0.123181			Meltrin	1.9764	1.03708	1.35306	0.897596	0.375961	0.0450859
			CG14200	1.5117	0.823177	1.71762	0.453215	0.572187	0.185671	0.327851			lncRNA:CR45935	0	0	0	0	0	0	0			asRNA:CR44703	0	0	0	0	0	0	0			Rab1	23.133	0.298988	0.419951	0.916156	0.497066	0.699609	0.28482			CG42268	10.1425	0.540138	0.619186	1.03735	0.333137	0.320186
			CG43618	0	0	0	0	0	0	0			CG31515	0	0	0	0	0	0	0			DopEcR	36.9476	0.135377	0.270461	0.527763	0.516118	0.998254	0.0604288			wash	1.55359	0.600112	1.39736	0.410913	0.683597	0	0.116698			lncRNA:CR43995	0.315919	1.34191	2.02349	0.571654	0.357924	0
			Atox1	25.9826	0.270496	0.427004	1.06263	0.338608	0.738052	0.561879			CG32706	3.75994	0.513356	1.17199	0.513499	0.563911	0.499247	0.324588			CG46394	0	0	0	0	0	0	0			RanBPM	1.42419	0.5869	1.49138	0.398109	0.690632	0	0.0936342			Crz	0.435178	1.40524	2.38161	0.637088	0.457585	0.0450859
			asRNA:CR43636	0	0	0	0	0	0	0			ymp	0	0	0	0	0	0	0			CR46300	0	0	0	0	0	0	0			CG13012	4.77987	1.6326	1.53364	0.64396	0.621907	0	1.49853			AGO2	4.44675	0.902274	0.88981	0.972562	0.412215	0.154371
			asRNA:CR43637	0	0	0	0	0	0	0			CG31525	0	0	0	0	0	0	0			lncRNA:CR44773	0	0	0	0	0	0	0			ND-20	18.9813	0.328461	0.471364	0.708038	0.49717	0.800349	0.126816			Polr2K	6.6524	0.647864	0.726317	0.994481	0.414789	0.158561
			nej	10.1765	0.453697	0.585854	0.832206	0.457663	0.283672	0.503318			asRNA:CR44351	0	0	0	0	0	0	0			CG46244	0	0	0	0	0	0	0			RpS23	46.2813	0.3107	0.369034	0.837858	0.453861	0.736185	0.171216			bin3	6.61786	0.584292	0.741376	0.905055	0.398202	0.222979
			lncRNA:CR43617	0	0	0	0	0	0	0			VhaPPA1-2	0	0	0	0	0	0	0			lncRNA:CR44772	0	0	0	0	0	0	0			CG15211	0.891092	1.16437	2.44123	0.455714	0.688386	0	0.559134			CG4467	16.4508	0.447038	0.465167	1.08692	0.315219	0.456721
			lncRNA:CR44462	0	0	0	0	0	0	0			CR45934	0	0	0	0	0	0	0			lncRNA:CR44770	0	0	0	0	0	0	0			Dh44-R2	3.68485	0.705834	1.34836	0.496314	0.656774	0	0.30321			nAChRalpha5	59.2108	0.542199	0.416933	1.33797	0.294975	0.524162
			lncRNA:CR44777	0.00867429	0.0849564	0.220863	0.024041	0.0437808	0	0.013134			GIIIspla2	2.18748	0.535955	1.29731	0.408474	0.605767	0.56164	0.251698			lncRNA:CR44771	0	0	0	0	0	0	0			RpLP1	152.485	0.284511	0.321099	0.868764	0.459564	0.892441	0.167036			mahe	11.9762	0.465602	0.544573	1.06785	0.389514	0.343372
			lncRNA:CR44473	0	0	0	0	0	0	0			CG42615	0	0	0	0	0	0	0			CG45603	0.00609192	0.00152383	0.293611	0.000399228	0.0766045	0.0769004	2.74615e-06			CstF64	0.450721	0.970215	2.89857	0.291374	0.772526	0	0.148553			CG41128	90.8376	0.271338	0.213195	1.40859	0.265402	0.513998
			lncRNA:CR44456	0	0	0	0	0	0	0			lncRNA:CR44348	0	0	0	0	0	0	0			lncRNA:CR46242	0	0	0	0	0	0	0			Ifrd1	2.63635	0.674236	1.25352	0.44329	0.671106	0	0.199997			5-HT1A	24.5874	0.68666	0.726572	1.028	0.360826	0.464482
			lncRNA:CR45005	0	0	0	0	0	0	0			lncRNA:CR44109	0	0	0	0	0	0	0			Drs	0	0	0	0	0	0	0			Mob4	3.85746	0.457691	0.907137	0.494987	0.620891	0	0.0976056			Socs36E	15.4472	0.425177	0.45403	1.03612	0.353672	0.484346
			lncRNA:CR44460	0	0	0	0	0	0	0			e(r)	2.59863	0.425113	1.28892	0.412112	0.490671	0.56167	0.17517			lncRNA:CR46220	0.00918559	0.0200454	0.271832	0.00567245	0.0724012	0	0.00052741			Qtzl	0.700349	0.801295	2.74041	0.339437	0.736965	0	0.127152			ed	9.12945	0.882885	0.746315	1.46661	0.256759	0.165029
			lncRNA:CR45013	0	0	0	0	0	0	0			zuc	0	0	0	0	0	0	0			asRNA:CR46264	0	0	0	0	0	0	0			CG34183	0.469134	0.935885	3.13452	0.333333	0.744147	0	0.17327			Spn	31.0884	0.381098	0.444746	1.23535	0.30746	0.439237
			lncRNA:CR44765	0	0	0	0	0	0	0			lncRNA:CR44345	0	0	0	0	0	0	0			sky	22.2091	0.176528	0.341715	0.51165	0.477399	0.998254	0.128091			Adk3	0.813258	0.700217	1.7923	0.484314	0.672642	0	0.34646			gce	19.6891	0.451682	0.417837	1.32961	0.327364	0.524014
			lncRNA:CR44455	0	0	0	0	0	0	0			CG43072	0	0	0	0	0	0	0			lncRNA:CR46265	0	0	0	0	0	0	0			Catsup	3.1652	0.495659	1.08623	0.515703	0.621046	0	0.157298			schlank	16.4522	0.41836	0.464094	1.0788	0.404735	0.497955
			lncRNA:CR43486	0	0	0	0	0	0	0			CG44341	0	0	0	0	0	0	0			lncRNA:CR44769	0	0	0	0	0	0	0			Magi	1.61811	0.80351	2.04589	0.556248	0.64523	0	0.483682			side-VIII	6.21697	0.97122	0.900381	1.35324	0.256785	0.096885
			lncRNA:CR44461	0	0	0	0	0	0	0			lncRNA:TS14	0	0	0	0	0	0	0			lncRNA:CR46243	0	0	0	0	0	0	0			wgn	5.63542	1.21414	0.959049	0.840427	0.563702	0.327921	1.59405			CG3726	16.6667	0.419962	0.577458	1.13263	0.310869	0.530305
			lncRNA:CR44764	0	0	0	0	0	0	0			lncRNA:CR44339	0	0	0	0	0	0	0			solo	0	0	0	0	0	0	0			HmgZ	22.8971	0.284033	0.41563	0.85261	0.479579	0.835232	0.219348			CG31650	14.0291	0.493799	0.515532	0.947168	0.407779	0.494951
			lncRNA:CR44484	0	0	0	0	0	0	0			lncRNA:CR44352	0	0	0	0	0	0	0			lncRNA:CR46216	0.00387424	0.00668012	0.271431	0.00189314	0.0754127	0.0769183	5.75292e-05			CG13315	1.00312	0.996312	2.97955	0.753762	0.635202	0	1.13395			su(sable)	1.9501	0.775609	1.31232	0.649564	0.557455	0.0450859
			lncRNA:CR44453	0	0	0	0	0	0	0			lncRNA:CR44338	0	0	0	0	0	0	0			CG46270	0	0	0	0	0	0	0			Tis11	5.82766	0.539144	0.930519	0.557086	0.62197	0.268674	0.257621			Pi3K68D	5.24451	1.06672	0.898571	1.57813	0.238979	0.0974077
			lncRNA:CR44763	0	0	0	0	0	0	0			lncRNA:CR44337	0	0	0	0	0	0	0			lncRNA:CR46267	0	0	0	0	0	0	0			CG7966	4.54541	0.530027	1.22306	0.466659	0.646026	0	0.119973			CG9650	12.6348	0.718044	0.948501	0.946729	0.404207	0.331267
			lncRNA:CR44463	0	0	0	0	0	0	0			lncRNA:CR44110	0	0	0	0	0	0	0			SdicA	0	0	0	0	0	0	0			jdp	45.8716	0.637501	0.614951	0.815755	0.522604	0.58384	0.649094			CG42671	4.89378	0.605145	0.828673	0.814203	0.424721	0.175794
			CG31211	6.85027	0.390515	0.757722	0.814547	0.373622	0.310531	0.437931			lncRNA:CR44346	0	0	0	0	0	0	0			asRNA:CR45275	0.00774847	0.0402121	0.270751	0.0114246	0.0678409	0.0769183	0.00219417			CG34293	3.31989	0.447745	1.04828	0.469942	0.643596	0	0.0915114			wapl	2.47491	0.83562	1.17324	0.780721	0.513463	0.0517144
			lncRNA:CR44466	0	0	0	0	0	0	0			tRNA:Pro-TGG-1-3	0	0	0	0	0	0	0			lncRNA:acal	0	0	0	0	0	0	0			CG3793	1.84634	0.612801	1.58521	0.418362	0.681402	0	0.12931			gro	16.2913	0.428826	0.453584	1.06784	0.336212	0.505042
			asRNA:CR45015	0	0	0	0	0	0	0			sing	0	0	0	0	0	0	0			lncRNA:CR46209	0	0	0	0	0	0	0			Vha44	15.2912	0.318993	0.494058	0.707977	0.514479	0.773005	0.147036			GlcAT-P	14.2948	0.655246	0.720711	1.03276	0.388564	0.399029
			lncRNA:CR44496	0.00804969	0.0717231	0.220863	0.0202963	0.0465861	0	0.00915356			mtTFB1	0	0	0	0	0	0	0			asRNA:CR46269	0	0	0	0	0	0	0			CG1910	3.6872	0.457664	0.939482	0.528181	0.611659	0	0.145308			S6KL	2.36613	0.842996	1.22872	0.789343	0.505582	0.0450859
			lncRNA:CR44470	0	0	0	0	0	0	0			CG43070	0	0	0	0	0	0	0			lncRNA:CR46240	0	0	0	0	0	0	0			Spn77Ba	3.61199	0.677166	1.04561	0.589205	0.625457	0	0.450765			beat-IIIb	39.3613	0.368792	0.357388	1.10564	0.382773	0.549845
			lncRNA:TS18	0	0	0	0	0	0	0			CG42258	2.8252	0.357403	0.990737	0.537169	0.556524	0.527779	0.369627			Alp1	0	0	0	0	0	0	0			Tctp	41.4968	0.31026	0.413535	0.695649	0.491222	0.848633	0.113722			zld	13.7651	0.810829	0.899079	1.35522	0.237338	0.352801
			lncRNA:CR44467	0	0	0	0	0	0	0			CheB98a	0	0	0	0	0	0	0			CR46272	0	0	0	0	0	0	0			awd	41.0688	0.272199	0.389047	0.851631	0.494138	0.696986	0.185475			Wdr62	19.3026	0.400232	0.427423	1.01859	0.273414	0.497283
			lncRNA:CR44451	0	0	0	0	0	0	0			CG31882	0.00924893	0.0463793	0.212237	0.0136579	0.0516887	0.0624961	0.00382557			lncRNA:CR44768	0	0	0	0	0	0	0			ATPsynD	46.7225	0.229446	0.341728	0.854948	0.451698	0.766017	0.130768			Hsp70Aa	1.23349	2.06886	2.10617	0.909499	0.309695	0.0450859
			lncRNA:CR44452	0	0	0	0	0	0	0			lncRNA:CR44387	0	0	0	0	0	0	0			lncRNA:CR44803	0.00832053	0.0200454	0.271832	0.00567245	0.0724012	0	0.00052741			RpS7	112.735	0.252253	0.278106	0.840439	0.417994	0.790914	0.125827			pdm3	12.9362	0.857503	0.931311	1.04997	0.286925	0.331171
			lncRNA:CR43613	0	0	0	0	0	0	0			CG43075	0	0	0	0	0	0	0			asRNA:CR46266	0	0	0	0	0	0	0			dgt1	0.763756	0.721204	1.96988	0.333068	0.740198	0	0.114908			CG33217	5.2961	0.527651	0.793493	0.72695	0.457413	0.195068
			CG44475	0	0	0	0	0	0	0			CG43069	0	0	0	0	0	0	0			CR46274	0	0	0	0	0	0	0			RFeSP	38.9559	0.316463	0.370969	1.20028	0.532642	0.645019	0.641946			kek3	12.0815	0.745283	0.53313	1.4936	0.226841	0.332993
			lncRNA:CR44468	0	0	0	0	0	0	0			lncRNA:CR44111	0	0	0	0	0	0	0			CG3558	2.06947	0.369488	1.38402	0.248342	0.761052	0.691227	0.0834189			mt:ATPase8	2.21738	0.53546	1.24437	0.489888	0.646059	0	0.173067			CG45049	33.0759	0.325423	0.320922	1.11561	0.318857	0.593315
			lncRNA:CR44479	0	0	0	0	0	0	0			lncRNA:CR44112	0	0	0	0	0	0	0			CR46273	0	0	0	0	0	0	0			CG1598	3.91307	0.44534	0.966918	0.4677	0.640875	0	0.0877543			RpS18	60.1287	0.183733	0.256881	0.751272	0.441482	0.770082
			asRNA:CR43615	0	0	0	0	0	0	0			tRNA:Leu-TAA-1-1	0	0	0	0	0	0	0			CR46180	0	0	0	0	0	0	0			dbr	1.14047	0.792587	1.81433	0.358495	0.728352	0	0.194826			dpr14	34.4137	0.479008	0.34382	1.53003	0.246264	0.45251
			CG44477	0	0	0	0	0	0	0			CCY	0	0	0	0	0	0	0			lncRNA:CR46207	0	0	0	0	0	0	0			Charon	2.31861	0.730569	1.41484	0.452017	0.675925	0	0.282967			CG42342	39.1083	0.387274	0.547693	1.03644	0.315869	0.521526
			lncRNA:CR44469	0	0	0	0	0	0	0			lncRNA:CR44113	0	0	0	0	0	0	0			CR46279	0	0	0	0	0	0	0			Pcyt1	5.1192	0.752856	0.990584	0.580736	0.611523	0	0.453947			Dpp10	13.0001	0.414592	0.517014	0.979242	0.337628	0.386854
			lncRNA:CR43612	0	0	0	0	0	0	0			asRNA:CR44114	0	0	0	0	0	0	0			Dhc16F	0	0	0	0	0	0	0			ifc	5.60073	0.619756	1.06237	0.469512	0.650139	0.299893	0.200689			alpha-Cat	20.7322	0.359952	0.404758	1.0093	0.376767	0.622016
			lncRNA:CR44483	0	0	0	0	0	0	0			mir-iab-4	0	0	0	0	0	0	0			nw	0	0	0	0	0	0	0			Dci	1.29428	0.649073	1.8858	0.340098	0.734461	0	0.0927605			dysc	105.364	0.243821	0.212113	1.22881	0.279225	0.544382
			lncRNA:CR44755	0	0	0	0	0	0	0			CG2680	5.81635	0.5727	1.26184	0.376883	0.669399	0.553687	0.269935			SdicB	0	0	0	0	0	0	0			pelo	2.10676	0.764943	1.94452	0.344227	0.733193	0	0.143334			Hsp67Bc	14.2882	0.867696	1.55454	0.921797	0.453283	0.272849
			lncRNA:CR44459	0	0	0	0	0	0	0			CG43063	0	0	0	0	0	0	0			SdicC	0	0	0	0	0	0	0			Bap60	1.32323	0.971784	1.75204	0.423732	0.697072	0	0.40553			CG42788	4.1331	0.696906	1.20316	0.831399	0.486122	0.14497
			CG44476	0	0	0	0	0	0	0			asRNA:CR44115	0	0	0	0	0	0	0			RNaseMRP:RNA	0.283507	0.984928	1.93026	0.423304	0.403942	0.229935	0.426932			sp3	0.539437	0.866388	2.51185	0.470957	0.686399	0	0.407866			Ncoa6	11.2431	0.394966	0.496021	0.899843	0.418346	0.477217
			CG42806	1.1962	0.775933	1.86113	0.472718	0.478394	0.0619437	0.331148			CG43076	0	0	0	0	0	0	0			Alp2	0	0	0	0	0	0	0			Pka-R2	1.95008	0.508079	1.54654	0.420164	0.68028	0	0.0974515			Task6	11.74	0.399557	0.532038	0.900115	0.430514	0.463046
			CG43229	0.0656079	0.329951	1.21239	0.0992657	0.273636	0	0.0554698			eIF3l	14.2613	0.237916	0.505922	0.592537	0.429236	0.809778	0.175817			lncRNA:CR46239	0	0	0	0	0	0	0			sau	4.36539	0.404077	0.867581	0.551888	0.618806	0	0.16431			CtBP	34.941	0.290827	0.312216	1.08407	0.346435	0.58932
			ssx	10.3788	0.352895	0.60954	0.627608	0.457317	0.459802	0.193605			CG43064	0	0	0	0	0	0	0			lncRNA:CR46115	0	0	0	0	0	0	0			sturkopf	3.80608	0.472236	1.06369	0.596297	0.628715	0	0.290462			CG31224	4.2499	0.585346	0.986615	0.760165	0.494389	0.138978
			lncRNA:CR44505	0	0	0	0	0	0	0			mei-38	0	0	0	0	0	0	0			lncRNA:CR46238	0	0	0	0	0	0	0			CG11699	9.86886	0.383902	0.633414	0.586288	0.575994	0.851403	0.146267			DIP-zeta	6.80641	1.11109	1.12636	1.41308	0.212486	0.030845
			CR43482	0	0	0	0	0	0	0			tRNA:Ala-AGC-2-6	0	0	0	0	0	0	0			lncRNA:CR46210	0	0	0	0	0	0	0			RpL7A	67.9552	0.234216	0.300459	0.765499	0.444412	0.847722	0.0848018			G9a	18.0365	0.345819	0.415906	0.952507	0.369273	0.575367
			lncRNA:CR44482	0	0	0	0	0	0	0			lncRNA:CR44117	0	0	0	0	0	0	0			CR46183	0	0	0	0	0	0	0			jagn	1.98171	0.502319	1.24273	0.440481	0.678699	0	0.149092			eIF2beta	12.9346	0.395464	0.534368	0.837767	0.482149	0.38769
			lncRNA:CR43484	0	0	0	0	0	0	0			tRNA:Ala-AGC-2-9	0	0	0	0	0	0	0			lncRNA:CR46253	0.0119974	0.0309541	0.271832	0.00875941	0.0699492	0.0769217	0.0012776			ND-19	13.8701	0.305566	0.51083	0.730712	0.541395	0.74044	0.189147			hwt	25.8454	0.313732	0.375812	0.927559	0.393755	0.603098
			CG43295	0.00961619	0.0706622	0.220863	0.019996	0.0468135	0	0.00886872			CG31093	0.0067861	0.0162869	0.220863	0.00460887	0.058826	0	0.000428521			CR46181	0	0	0	0	0	0	0			Chsy	2.593	0.745469	2.59073	0.319142	0.749976	0	0.085793			Epac	4.38068	0.763759	0.909966	0.911749	0.374607	0.0963254
			lncRNA:CR44504	0	0	0	0	0	0	0			Golgin245	1.94778	0.504205	1.35247	0.384387	0.588095	0.499247	0.291932			CR46189	0	0	0	0	0	0	0			CG11275	1.65229	0.901613	1.74942	0.438121	0.689472	0	0.385825			hiw	4.30783	0.879188	0.918592	1.07846	0.329095	0.102811
			lncRNA:CR43485	0	0	0	0	0	0	0			Cyp6u1	1.10483	0.634115	1.89612	0.32711	0.684086	0.499247	0.263412			CR46182	0	0	0	0	0	0	0			mRpS9	3.54813	0.418413	1.01452	0.456394	0.656876	0	0.0935694			RhoGEF3	8.85481	0.411256	0.651434	0.770272	0.413453	0.283979
			lncRNA:CR44480	0	0	0	0	0	0	0			tRNA:Ala-AGC-2-10	0	0	0	0	0	0	0			lncRNA:CR46237	0	0	0	0	0	0	0			Sp7	2.83603	0.973659	1.94841	0.551753	0.65065	0	0.66601			CR40190	0.190116	1.14047	2.27925	0.429494	0.438657	0
			lncRNA:CR44752	0	0	0	0	0	0	0			lncRNA:CR45940	0	0	0	0	0	0	0			trc	4.07993	0.28879	0.81078	0.32534	0.669439	0.69181	0.133302			Usp5	0.832293	0.842739	2.31345	0.501612	0.677663	0	0.492969			CG12239	1.22738	1.3868	2.41808	0.673319	0.482407	0.026057
			CR43483	0	0	0	0	0	0	0			Ntl	0.0121514	0.0263883	0.459422	0.00744139	0.119075	0.12498	0.00104028			lncRNA:CR46206	0	0	0	0	0	0	0			RpL14	119.299	0.227541	0.290703	0.810643	0.430617	0.785336	0.0897709			tnc	1.71777	1.27543	1.64362	0.928816	0.355308	0.00206849
			lncRNA:CR44485	0	0	0	0	0	0	0			tRNA:Ala-AGC-1-1	0	0	0	0	0	0	0			CR46187	0	0	0	0	0	0	0			CG3527	1.77456	0.566823	1.38488	0.424459	0.680052	0	0.144224			lncRNA:CR44043	1.37774	1.00882	1.89558	0.598463	0.499074	0
			lncRNA:CR44481	0	0	0	0	0	0	0			tRNA:Ala-AGC-2-2	0	0	0	0	0	0	0			lncRNA:CR46299	0	0	0	0	0	0	0			Polr2I	2.61644	0.568959	1.33611	0.38891	0.699662	0	0.111692			CG14757	27.3054	0.347982	0.434882	0.882555	0.397861	0.609867
			lncRNA:CR45111	0.00867429	0.0849564	0.220863	0.024041	0.0437808	0	0.013134			tRNA:Pro-TGG-1-4	0	0	0	0	0	0	0			scyl	16.026	0.185549	0.538788	0.479309	0.603576	0.998254	0.121466			CG7054	1.43016	0.589622	1.53539	0.372715	0.716642	0	0.128499			Pde9	46.3223	0.424383	0.304522	1.53414	0.281757	0.471784
			CG32264	112.637	0.239195	0.225819	1.23765	0.278939	0.627547	0.610419			Catsup	1.64913	0.548727	1.58134	0.416582	0.607909	0.499247	0.294802			CR46188	0	0	0	0	0	0	0			CG32202	0.547339	0.656346	2.16112	0.315394	0.754498	0	0.095335			Parp	31.3454	0.284003	0.341256	0.994076	0.382381	0.622929
			lncRNA:CR44516	0	0	0	0	0	0	0			tRNA:Ala-AGC-2-5	0	0	0	0	0	0	0			CR46184	0	0	0	0	0	0	0			CG8300	0.615963	0.807169	2.35828	0.379951	0.724734	0	0.260021			Kdm4B	8.15376	0.728445	0.617856	1.34933	0.246741	0.219057
			lncRNA:CR44751	0	0	0	0	0	0	0			Tmem18	2.25092	0.582293	1.18118	0.406705	0.645212	0.436766	0.306101			CR46186	0	0	0	0	0	0	0			Vha14-1	37.2815	0.24358	0.331356	0.707791	0.484099	0.876525	0.0859735			alpha-Spec	10.2868	0.541105	0.709444	0.804848	0.44125	0.292406
			lncRNA:CR44487	0	0	0	0	0	0	0			tRNA:Ala-AGC-2-7	0	0	0	0	0	0	0			CG46191	0	0	0	0	0	0	0			prel	5.7553	0.378956	0.769923	0.480785	0.631335	0	0.0794954			Piezo	2.33479	0.783826	1.41934	0.790311	0.385465	0
			lncRNA:CR44513	0	0	0	0	0	0	0			TM4SF	49.9038	-0.0380607	0.510681	0.749412	0.392737	0.802098	-0.290817			CR46190	0	0	0	0	0	0	0			Gadd45	1.46564	0.717787	1.93008	0.341617	0.738689	0	0.146542			CG15894	3.93093	0.598843	1.03982	0.591278	0.53745	0.18119
			CG43341	0.026501	0.176858	0.680286	0.0485027	0.149302	0.0619437	0.0189214			CG44388	0	0	0	0	0	0	0			lncRNA:CR46233	0	0	0	0	0	0	0			RpLP2	144.267	0.223179	0.363364	0.834697	0.4548	0.747908	0.0888195			bi	22.975	0.741163	1.04121	1.24725	0.295539	0.275548
			Tfb5	0	0	0	0	0	0	0			CG31546	0	0	0	0	0	0	0			lncRNA:CR46236	0	0	0	0	0	0	0			Irbp	0.53002	0.834328	2.57281	0.360026	0.738666	0	0.247854			wde	14.1289	0.324145	0.476046	0.782741	0.461953	0.534822
			lncRNA:CR44736	0	0	0	0	0	0	0			asRNA:CR46066	0.00746329	0.0162869	0.220863	0.00460887	0.058826	0	0.000428521			CR46185	0	0	0	0	0	0	0			Dph2	0.64084	0.62693	2.30397	0.344303	0.737384	0	0.120033			5-HT2A	4.80715	0.900082	1.22831	1.13025	0.424597	0.159063
			lncRNA:CR44740	0	0	0	0	0	0	0			lncRNA:CR46061	0.0067861	0.0162869	0.220863	0.00460887	0.058826	0	0.000428521			Vha36-1	40.2112	0.149428	0.281052	0.569154	0.629201	0.998254	0.114331			drk	4.80359	0.55243	0.946102	0.443116	0.671739	0	0.182551			Calx	13.4323	0.713253	0.684431	1.36126	0.26551	0.302692
			lncRNA:CR44781	0.00831421	0.000426933	0.220863	0.000120814	0.0624036	0	2.8619e-07			asRNA:CR46096	0.00523445	0.00123811	0.238559	0.000324372	0.0622412	0.0624816	2.23124e-06			lncRNA:CR46234	0	0	0	0	0	0	0			Polr2K	3.97456	0.46428	1.01318	0.426909	0.67062	0	0.0925693			CG7065	1.80218	1.03425	1.45989	0.877545	0.444054	0.0450859
			lncRNA:CR44518	0	0	0	0	0	0	0			CG18787	0.560046	0.968597	2.28081	0.510985	0.538039	0.312372	0.602051			lncRNA:CR46230	0	0	0	0	0	0	0			CG7857	0.583404	0.657144	2.91362	0.325974	0.752817	0	0.105194			chb	6.9206	0.700077	0.70766	1.12984	0.348236	0.201485
			lncRNA:CR44488	0	0	0	0	0	0	0			CR31562	0	0	0	0	0	0	0			CG46192	0	0	0	0	0	0	0			pr	5.16479	0.585272	1.15517	0.407684	0.689227	0	0.137774			CG32369	19.4032	0.307639	0.410132	0.914588	0.400033	0.587029
			G9a	18.4818	0.261725	0.4247	0.813597	0.435323	0.66024	0.212428			nrv3	423.209	-0.226042	0.325297	1.00997	0.239833	0.74707	-0.335302			lncRNA:CR46241	0	0	0	0	0	0	0			Trm7-34	0.578106	0.647401	2.62918	0.301635	0.764455	0	0.0784353			CG8878	4.31321	0.482785	0.872356	0.662285	0.414153	0.193235
			lncRNA:CR44501	0	0	0	0	0	0	0			lncRNA:CR46060	0.00985794	0.00123811	0.238559	0.000324372	0.0622412	0.0624816	2.23124e-06			lncRNA:CR46208	0	0	0	0	0	0	0			CG33635	1.27998	0.612654	1.62592	0.386521	0.709982	0	0.151408			dlg1	64.9779	0.21693	0.243961	1.06362	0.374703	0.635532
			lncRNA:CR44502	0	0	0	0	0	0	0			asRNA:CR45828	0.00676043	0.0162869	0.220863	0.00460887	0.058826	0	0.000428521			lncRNA:CR46245	0	0	0	0	0	0	0			CG8745	36.5145	0.331195	0.68148	0.640815	0.550337	0.604339	0.0954484			mld	1.47996	0.965827	1.70557	0.741369	0.456587	0.0450859
			lncRNA:CR44735	0	0	0	0	0	0	0			CG11790	5.39971	0.549543	1.04908	0.443087	0.622574	0.668718	0.32559			lncRNA:CR46214	0	0	0	0	0	0	0			sni	1.35085	0.935213	1.73978	0.411353	0.700821	0	0.360631			Smurf	2.55693	0.920007	1.31286	0.856147	0.425126	0.0450859
			Hipk	19.2728	0.252632	0.441285	0.846362	0.444635	0.748006	0.245504			lncRNA:CR45884	0.00610112	0.0122235	0.220387	0.00346647	0.0597356	0.0624961	0.000240154			lncRNA:CR46231	0	0	0	0	0	0	0			CG11367	0.428133	0.851569	2.7462	0.448478	0.701868	0	0.402387			Rip11	9.93501	0.589841	0.595522	1.17966	0.232169	0.306599
			lncRNA:CR44503	0	0	0	0	0	0	0			Ald1	112.233	0.173447	0.2671	0.753384	0.299154	0.928304	0.165854			lncRNA:CR46213	0	0	0	0	0	0	0			RpS16	43.2783	0.220568	0.34189	0.734837	0.480236	0.802511	0.0774406			SLO2	9.32251	0.582681	0.864181	1.07286	0.398806	0.224042
			lncRNA:CR44741	0	0	0	0	0	0	0			lncRNA:CR44330	0.139633	0.200407	1.13531	0.0753848	0.294508	0.124978	0.0737558			CG45273	0.00832053	0.0200454	0.271832	0.00567245	0.0724012	0	0.00052741			CG12926	21.6845	0.308403	0.616148	0.592813	0.56751	0.579271	0.0962912			lncRNA:CR43651	1.34063	1.18807	1.61425	0.845553	0.462003	0.0450859
			lncRNA:CR44377	0.00514684	0.00192749	0.220863	0.000545443	0.0620648	0	5.84922e-06			CG42450	23.945	-0.184156	0.694551	0.571688	0.453728	0.871955	-0.239239			Rab4	12.8248	0.1746	0.439248	0.432601	0.586157	0.998254	0.0862946			Ripalpha	1.16512	0.598223	1.69079	0.326086	0.746203	0	0.0945021			sr	15.2156	0.722806	0.829299	0.923018	0.349314	0.409151
			asRNA:CR44509	0	0	0	0	0	0	0			nrv2	55.1485	0.149461	1.49289	0.895654	0.520261	0.569003	0.704269			PGAP1	0.517874	0.885236	2.29985	0.424082	0.592704	0.537558	0.401142			CG31028	0.44523	0.867344	1.4777	0.469572	0.340195	0	0.339846			Gbeta13F	108.494	0.188653	0.208314	1.00616	0.40216	0.663032
			lncRNA:CR44519	0	0	0	0	0	0	0			Tom7	36.488	0.180453	0.342365	0.63034	0.405619	0.968904	0.162829			lncRNA:CR46229	0	0	0	0	0	0	0			dl	1.02498	0.662389	2.45128	0.38406	0.719801	0	0.148185			sina	21.6749	0.298431	0.413693	0.766189	0.465402	0.667634
			lncRNA:CR44750	0	0	0	0	0	0	0			CG31909	0.00494968	0.00123811	0.238559	0.000324372	0.0622412	0.0624816	2.23124e-06			lncRNA:CR44541	0.0132461	0.130994	0.293611	0.0343191	0.0504223	0.0769004	0.0240288			RpS21	67.3085	0.233005	0.379616	0.767542	0.486528	0.871288	0.115424			snRNA:7SK	4.77135	0.844458	0.869685	1.13654	0.368986	0.0690979
			lncRNA:CR44739	0	0	0	0	0	0	0			CG31106	0	0	0	0	0	0	0			lncRNA:CR46212	0	0	0	0	0	0	0			MESR3	4.07059	0.724856	1.38337	0.43206	0.695331	0	0.300536			Pdfr	8.38192	0.841734	0.898201	1.09093	0.309208	0.268061
			lncRNA:CR45388	0.162708	0.566951	0.708324	0.28561	0.138607	0	0.399438			CG31459	0	0	0	0	0	0	0			lncRNA:CR46211	0	0	0	0	0	0	0			CG6179	0.644431	0.836268	2.49408	0.398776	0.719267	0	0.311138			nmo	82.6529	0.196049	0.238983	0.928845	0.400663	0.658823
			lncRNA:CR44510	0	0	0	0	0	0	0			CG31664	0.00594568	0.0251502	0.220863	0.00711702	0.0568337	0.0624989	0.00103805			lncRNA:CR44517	0.0232519	0.0572825	0.510421	0.017678	0.139784	0	0.00266883			Gip	3.0824	0.503377	1.18547	0.556301	0.655527	0	0.331528			cnc	5.07249	0.796973	1.09419	0.959527	0.356507	0.171519
			lncRNA:CR44508	0	0	0	0	0	0	0			lncRNA:CR44389	0	0	0	0	0	0	0			lbk	4.29456	0.235234	0.76018	0.323708	0.656094	0.844881	0.0645398			ND-75	7.45689	0.421244	0.795291	0.658014	0.613924	0.314661	0.338478			CG46339	7.39809	0.641476	0.929722	0.981161	0.407194	0.21626
			lncRNA:CR44507	0	0	0	0	0	0	0			CG31419	0	0	0	0	0	0	0			lncRNA:CR46203	0	0	0	0	0	0	0			CG15535	1.93342	0.586179	1.31725	0.438596	0.6827	0	0.210625			Trf4-1	4.16559	0.696201	0.919592	0.941895	0.373126	0.0963289
			scaRNA:PsiU5-44	0	0	0	0	0	0	0			lawc	7.50486	0.315774	0.610959	0.533187	0.57538	0.930954	0.229643			lncRNA:CR46228	0	0	0	0	0	0	0			vsg	12.3415	0.401876	0.712406	0.471413	0.650162	0.614588	0.120759			klg	71.5163	0.526526	0.590512	1.00715	0.349626	0.558003
			Nup153	6.13609	0.485636	0.798924	0.62726	0.527638	0.185671	0.327857			asRNA:CR46058	0	0	0	0	0	0	0			Alk	17.7479	0.231063	0.438724	0.455752	0.417797	0.976376	0.195561			CG6204	0.421764	0.661951	2.35814	0.28178	0.780977	0	0.104377			sle	1.85348	0.997749	1.66756	0.763113	0.430879	0.0450859
			lncRNA:CR44511	0	0	0	0	0	0	0			ppk22	0	0	0	0	0	0	0			lncRNA:CR46215	0	0	0	0	0	0	0			COX5B	60.8082	0.233956	0.330375	1.0162	0.557614	0.661296	0.359463			CG18809	1.9307	1.00801	1.31852	0.820104	0.404779	0.0450859
			vnc	0.01209	0.103271	0.268691	0.0240219	0.043795	0.0624704	0.0159509			CG31463	0	0	0	0	0	0	0			lncRNA:CR46227	0	0	0	0	0	0	0			CG13919	1.34551	0.564151	1.74777	0.322153	0.747732	0	0.0734442			CG32425	15.6432	0.297851	0.479545	0.702713	0.524281	0.584872
			Ggamma30A	350.066	0.185376	0.164634	1.42295	0.368501	0.63091	0.539543			Ir94c	0	0	0	0	0	0	0			corolla	0	0	0	0	0	0	0			CG32091	0.438058	0.699974	2.67857	0.261182	0.793964	0	0.0702852			CG33143	9.687	0.566127	0.786545	0.998005	0.355432	0.276365
			lncRNA:CR44737	0	0	0	0	0	0	0			CG31418	0	0	0	0	0	0	0			lncRNA:CR46196	0	0	0	0	0	0	0			SdhB	12.6	0.3032	0.564434	0.570979	0.586586	0.882049	0.108141			EloA	1.94229	1.05271	1.45919	0.861174	0.417593	0.0450859
			para	89.9052	0.193577	0.236029	1.08757	0.289389	0.725732	0.238246			asRNA:CR46092	0.00314782	0.0054276	0.220538	0.00153817	0.0612728	0.0624961	4.67425e-05			lncRNA:CR46197	0	0	0	0	0	0	0			Pi3K21B	1.0469	0.599398	1.64489	0.340157	0.739872	0	0.122896			Kul	2.97834	0.905581	1.10515	0.911642	0.378088	0.0615409
			CG10011	8.32182	0.166983	0.664677	0.376221	0.576771	0.355912	0.107298			CG13484	1.63406	0.466488	1.54301	0.295569	0.623426	0.436766	0.0932385			lncRNA:CR46198	0	0	0	0	0	0	0			Abi	1.88859	0.446827	1.38795	0.394586	0.702923	0	0.0925674			mew	1.38416	0.993957	1.88612	0.623561	0.492268	0
			CG45095	0.00453979	0.0437452	0.220834	0.0123807	0.0526858	0	0.00324529			CG46059	0	0	0	0	0	0	0			CG46193	0	0	0	0	0	0	0			RpS18	77.2356	0.237439	0.424413	0.732321	0.518044	0.758916	0.0958411			gish	56.0852	0.203382	0.262731	0.848683	0.374991	0.692519
			lncRNA:CR44558	0.035113	0.0937339	0.883453	0.0265249	0.229071	0.0612565	0.00880873			nxf4	0	0	0	0	0	0	0			asRNA:CR46195	0	0	0	0	0	0	0			Flo1	5.814	0.353197	0.837288	0.455117	0.652473	0	0.0679335			kdn	12.7787	0.357555	0.556639	0.714408	0.53089	0.480334
			lncRNA:CR44400	0.00514684	0.00192749	0.220863	0.000545443	0.0620648	0	5.84922e-06			Ir94b	0	0	0	0	0	0	0			Cog8	0.842181	0.533214	2.19766	0.273087	0.722709	0.537558	0.263434			CG12795	1.44664	0.501006	1.59732	0.341515	0.734604	0	0.0752356			Nipped-A	8.62153	0.531052	0.622791	1.03715	0.312871	0.285499
			Dg	4.40021	0.488916	1.28965	0.575793	0.574164	0.185671	0.265704			lncRNA:CR46056	0	0	0	0	0	0	0			Hrb27C	48.5788	0.116601	0.244212	0.499424	0.605315	0.998254	0.0601702			CG11722	1.29294	0.664924	1.81164	0.344295	0.744482	0	0.184108			CG3638	8.71623	0.357838	0.615731	0.659935	0.445934	0.294063
			Set1	15.6421	0.290072	0.44004	0.75695	0.453364	0.721303	0.225648			AnxB10	11.1254	0.319588	0.73407	0.478688	0.556942	0.789038	0.195701			lncRNA:CR46205	0	0	0	0	0	0	0			CG17721	1.74001	0.490934	1.69245	0.343274	0.73278	0	0.0628711			RpL17	59.481	0.31018	0.276146	1.21344	0.313953	0.572778
			CG1208	0.139686	0.926174	2.145	0.273005	0.418897	0.0612565	0.219474			asRNA:CR45929	0	0	0	0	0	0	0			lncRNA:CR46226	0	0	0	0	0	0	0			RpL19	67.6277	0.276551	0.329477	0.657237	0.547172	0.922599	0.141414			Golgin245	3.59578	0.736934	1.00879	0.767241	0.44133	0.186
			CG44405	0.00514684	0.00192749	0.220863	0.000545443	0.0620648	0	5.84922e-06			Osi16	0	0	0	0	0	0	0			asRNA:CR46246	0	0	0	0	0	0	0			Uros1	0.620097	0.623254	2.54031	0.273023	0.786673	0	0.0743084			Frq1	80.1687	0.32646	0.256824	1.39449	0.190591	0.464161
			lncRNA:CR44444	0.0148743	0.0398735	0.174261	0.0143009	0.0511883	0	0.00345739			lncRNA:CR46057	0	0	0	0	0	0	0			lncRNA:CR46200	0	0	0	0	0	0	0			CG30466	0.531356	0.764817	3.04063	0.238569	0.811538	0	0.0746373			Zdhhc8	23.8074	0.394477	0.371919	1.25624	0.356369	0.515153
			lncRNA:CR44785	0.00831421	0.000426933	0.220863	0.000120814	0.0624036	0	2.8619e-07			lncRNA:CR45953	0	0	0	0	0	0	0			lncRNA:CR46199	0	0	0	0	0	0	0			CG9331	3.22961	0.377465	0.994964	0.414985	0.682498	0	0.0690619			lncRNA:CR45674	0.49149	0.920644	1.80497	0.419999	0.419665	0
			RhoGAPp190	22.7527	0.297601	0.431043	0.73493	0.439385	0.718463	0.195913			CR31427	0	0	0	0	0	0	0			lncRNA:CR46221	0	0	0	0	0	0	0			Cbp20	3.46028	0.580371	1.08355	0.441744	0.677393	0	0.215821			Ms	1.45728	1.30079	2.02806	0.66459	0.449266	0.0450859
			CR43310	0.00736882	0.0920945	0.220863	0.026061	0.0422935	0	0.0156198			Vha26	58.712	0.152344	0.256384	0.587785	0.54447	0.972409	0.0746936			lncRNA:CR45276	0.00661442	0.0309541	0.271832	0.00875941	0.0699492	0.0769217	0.0012776			CG14968	1.82878	0.953879	1.99177	0.331542	0.747216	0	0.242043			CG42271	4.47327	0.642782	0.886326	0.793307	0.454466	0.139782
			Rtf1	4.75224	0.411505	0.967431	0.624029	0.532482	0.185671	0.297158			lncRNA:CR45949	0	0	0	0	0	0	0			lncRNA:CR46202	0	0	0	0	0	0	0			Pa1	0.861067	0.737844	1.81177	0.517094	0.679348	0	0.494562			CG10555	3.69056	0.766844	1.01447	0.808654	0.399358	0.082556
			CG42258	4.80466	0.404558	0.949723	0.773946	0.434292	0.185671	0.528346			CR45948	0	0	0	0	0	0	0			lncRNA:CR46224	0	0	0	0	0	0	0			Vha26	32.9095	0.229195	0.359315	0.63614	0.524839	0.860414	0.0646001			CG2926	5.8635	0.580951	0.742719	0.802219	0.465341	0.25912
			Dad	7.51242	0.422327	0.85608	0.702479	0.441329	0.264073	0.342006			CG31560	0	0	0	0	0	0	0			Dpp10	9.14402	0.516178	0.750058	0.815444	0.418269	0.873614	0.377449			STUB1	3.89299	0.358774	0.877537	0.463095	0.659463	0	0.0978916			hid	1.47216	1.19659	1.37617	0.870867	0.379717	0
			mamo	100.421	0.168283	0.381711	1.03193	0.228465	0.610086	0.315762			CG31036	0.0187729	0.00902049	0.168267	0.00335052	0.059828	0.0624961	0.000171172			CG44422	8.79605	0.601552	1.09704	0.476999	0.481775	0.614342	0.419265			ana	7.88805	0.551803	2.00919	0.414179	0.692897	0.216962	0.0829088			Hsp26	112.386	1.62688	1.60954	1.03542	0.346372	0.539096
			lncRNA:CR44489	0	0	0	0	0	0	0			tRNA:Gly-TCC-1-1	0	0	0	0	0	0	0			lncRNA:CR46219	0	0	0	0	0	0	0			RpL18	62.9665	0.199648	0.330071	0.726306	0.503964	0.777124	0.0777126			bru3	154.336	0.720453	0.538501	1.26839	0.307872	0.504797
			mgl	7.57304	0.842487	1.03788	0.59044	0.491157	0.288948	0.59834			tRNA:Thr-TGT-2-5	0	0	0	0	0	0	0			CG13850	3.02141	0.434185	1.37129	0.237172	0.615255	0.614457	0.0912618			CG9426	2.33981	0.480755	1.18263	0.377157	0.709831	0	0.0974232			CLIP-190	29.6535	0.356283	0.358797	1.07045	0.328249	0.598009
			lncRNA:CR44401	0	0	0	0	0	0	0			CG31446	0	0	0	0	0	0	0			lncRNA:CR46218	0	0	0	0	0	0	0			lncRNA:CR45625	0.29885	0.844163	3.51469	0.236748	0.814112	0	0.101835			lncRNA:CR44092	1.14475	1.25999	1.78838	0.793266	0.452891	0.0450859
			Vti1b	8.28782	0.406727	0.638935	0.625675	0.537306	0.372339	0.293369			CG31551	0	0	0	0	0	0	0			lncRNA:CR45294	0.00387424	0.00668012	0.271431	0.00189314	0.0754127	0.0769183	5.75292e-05			Spn43Ab	76.5658	0.349652	0.686898	0.607467	0.60857	0.943941	0.187012			Dad	7.93696	0.605653	0.740773	0.885561	0.346362	0.305695
			lncRNA:CR44398	0	0	0	0	0	0	0			CR45946	0	0	0	0	0	0	0			lncRNA:CR44767	0	0	0	0	0	0	0			mor	0.381509	0.711237	3.04524	0.251671	0.802208	0	0.0737963			Cpsf6	5.58074	0.347387	0.779871	0.511915	0.559254	0.305014
			lncRNA:CR44399	0	0	0	0	0	0	0			CG31493	0	0	0	0	0	0	0			lncRNA:CR44810	0	0	0	0	0	0	0			fs(2)ltoPP43	0.826953	0.519318	2.02829	0.328867	0.749907	0	0.111001			Atg13	4.58276	0.69675	0.850551	0.861401	0.444887	0.124494
			yin	0	0	0	0	0	0	0			CG31437	0	0	0	0	0	0	0			Opa1	11.9531	0.162618	0.480671	0.396623	0.572395	0.998254	0.0887802			Gp150	2.35231	0.474965	1.3533	0.340966	0.734598	0	0.0739827			jim	336.603	0.292318	0.204701	1.46735	0.215263	0.44827
			lncRNA:CR44397	0	0	0	0	0	0	0			ben	17.956	0.197442	0.424818	0.534465	0.48529	0.921927	0.0920002			lncRNA:CR44760	0.00918559	0.0200454	0.271832	0.00567245	0.0724012	0	0.00052741			Ssrp	0.713904	0.656416	2.17413	0.292535	0.772791	0	0.109374			orb	3.0046	0.55661	1.48506	0.460761	0.645614	0.118128
			CG44403	0	0	0	0	0	0	0			CG44439	0	0	0	0	0	0	0			lncRNA:CR44765	0	0	0	0	0	0	0			CG2889	0.514765	0.625551	2.92148	0.271041	0.78842	0	0.0667438			CG32683	17.7039	0.663567	0.648539	1.46151	0.234806	0.270381
			mbt	6.79178	0.348157	0.736785	0.684583	0.454776	0.286741	0.327043			CG31021	0	0	0	0	0	0	0			lncRNA:CR44845	0.0215363	0.0238957	0.54254	0.00677616	0.148442	0.0769183	0.000396953			CG4119	0.419251	0.733403	3.02592	0.229501	0.818804	0	0.0735352			amn	0.169831	0.941966	2.01543	0.33629	0.387277	0
			lncRNA:CR44490	0	0	0	0	0	0	0			CheB93b	0	0	0	0	0	0	0			asRNA:CR46261	0	0	0	0	0	0	0			Vps13D	0.335661	0.631232	2.78837	0.285044	0.780615	0	0.10183			Prosalpha1	0.102366	0.756079	2.17342	0.231299	0.458691	0
			lncRNA:CR44786	0	0	0	0	0	0	0			CR45947	0	0	0	0	0	0	0			CG4836	0	0	0	0	0	0	0			CG9849	2.3031	0.954388	1.2778	0.614766	0.650875	0	0.89789			Mbs	7.6305	0.491973	0.65591	0.848567	0.409074	0.255725
			CG4467	20.9136	0.307706	0.428713	0.762899	0.507376	0.777049	0.303872			ATPsynD	80.6496	0.144291	0.235157	0.641316	0.45524	0.95471	0.0905653			lncRNA:CR46247	0	0	0	0	0	0	0			Hrs	0.402116	0.652917	2.70003	0.268556	0.790003	0	0.0837533			RASSF8	12.6177	0.472082	0.5131	1.04369	0.308971	0.34543
			ImpE3	0.200636	1.05567	2.30364	0.38838	0.469238	0.185671	0.331843			lncRNA:CR45950	0	0	0	0	0	0	0			asRNA:CR46262	0	0	0	0	0	0	0			CG11103	4.03589	0.369462	1.0155	0.436957	0.669547	0	0.0818052			nAChRalpha6	178.139	0.257447	0.317587	1.55733	0.209238	0.418626
			SK	34.9022	0.495731	0.530253	1.06491	0.381547	0.543655	0.88148			lncRNA:CR45945	0	0	0	0	0	0	0			CR45931	0	0	0	0	0	0	0			RpL39	142.218	0.196712	0.313194	0.724238	0.478209	0.813512	0.0600145			Hug	0.578611	2.05253	2.16323	1.06921	0.306512	0.0450859
			scaRNA:PsiU6-40	0	0	0	0	0	0	0			CG31445	0	0	0	0	0	0	0			CCY	0	0	0	0	0	0	0			SCCRO	4.24459	0.475473	0.920933	0.467128	0.671649	0	0.218949			lncRNA:CR44997	1.84282	1.27473	1.41291	0.861539	0.426068	0.0185072
			lncRNA:CR44778	0	0	0	0	0	0	0			tRNA:Asp-GTC-3-1	0	0	0	0	0	0	0			lncRNA:CR46259	0	0	0	0	0	0	0			Fsn	1.68736	0.503033	1.39972	0.412466	0.705004	0	0.172026			RpS16	47.8233	0.191621	0.298744	0.747579	0.460328	0.724533
			lncRNA:CR44701	0.00514684	0.00192749	0.220863	0.000545443	0.0620648	0	5.84922e-06			asRNA:CR46068	0	0	0	0	0	0	0			lncRNA:CR45306	0.00387424	0.00668012	0.271431	0.00189314	0.0754127	0.0769183	5.75292e-05			CG31360	3.17283	0.554254	1.00066	0.497778	0.670119	0	0.312074			CG34353	9.11023	0.691936	0.980567	0.827608	0.420358	0.390193
			asRNA:CR44386	0.0050853	0.0368433	0.220863	0.0104259	0.0542197	0	0.00227406			bigmax	2.43411	0.401924	1.04984	0.338429	0.598118	0.499247	0.14022			asRNA:CR46255	0	0	0	0	0	0	0			cib	13.6783	0.329909	0.61476	0.468777	0.64483	0.933129	0.082814			stx	13.8783	0.398975	0.488251	0.925011	0.379182	0.504827
			Fkbp12	67.7427	0.183203	0.270083	0.854321	0.448797	0.795718	0.150629			tRNA:Thr-AGT-1-3	0	0	0	0	0	0	0			ct	5.80653	0.76029	0.840312	0.792258	0.249603	0.654009	1.09709			CG5196	1.47228	0.481968	1.4535	0.32338	0.747168	0	0.0668009			Cdep	11.967	0.445538	0.561625	1.04853	0.433766	0.323991
			asRNA:CR44600	0.00514684	0.00192749	0.220863	0.000545443	0.0620648	0	5.84922e-06			CG31086	0	0	0	0	0	0	0			lncRNA:CR46257	0	0	0	0	0	0	0			CG31673	5.30728	0.348375	0.959076	0.46242	0.665358	0	0.0968681			tud	4.65488	0.636313	0.950072	0.827201	0.427336	0.158991
			CG6051	2.88679	0.544742	1.16545	0.622199	0.46256	0.185671	0.43861			lncRNA:CR46073	0	0	0	0	0	0	0			ltl	0	0	0	0	0	0	0			tapas	1.35659	0.738681	2.06838	0.278795	0.78207	0	0.119039			robo2	6.44428	0.751927	1.28107	0.98918	0.376429	0.143544
			flfl	5.60737	0.371268	0.814257	0.698201	0.418155	0.185671	0.376018			TwdlH	0	0	0	0	0	0	0			asRNA:CR46256	0	0	0	0	0	0	0			GlcAT-S	3.32887	0.73118	1.39566	0.512204	0.672559	0	0.481032			ct	7.07644	0.637882	0.831849	0.941087	0.314947	0.337217
			lncRNA:CR44395	0	0	0	0	0	0	0			asRNA:CR31084	0	0	0	0	0	0	0			lncRNA:CR46260	0	0	0	0	0	0	0			Aldh-III	2.65085	0.420443	1.10389	0.475151	0.670716	0	0.173951			SCAP	6.63303	0.445554	0.747925	0.823919	0.390317	0.204007
			lncRNA:CR43289	0	0	0	0	0	0	0			asRNA:CR45804	0.0121514	0.0263883	0.459422	0.00744139	0.119075	0.12498	0.00104028			lncRNA:CR44763	0	0	0	0	0	0	0			CG5521	0.95113	0.533076	2.286	0.323349	0.752053	0	0.086435			Cngl	151.122	0.265054	0.232384	1.24545	0.323881	0.56215
			lncRNA:CR43640	0	0	0	0	0	0	0			asRNA:CR46069	0	0	0	0	0	0	0			asRNA:bsAS	0	0	0	0	0	0	0			whd	10.0336	0.416681	0.739466	0.504914	0.631633	0.864498	0.154943			CG1737	3.40965	0.635019	0.895913	0.788823	0.509607	0.0530084
			Opa1	18.5883	0.180273	0.507159	0.879892	0.31927	0.682279	0.224364			asRNA:CR46097	0	0	0	0	0	0	0			asRNA:CR46251	0	0	0	0	0	0	0			Su(var)2-HP2	0.486618	0.648918	2.69807	0.266662	0.792999	0	0.0971036			DOR	30.1021	0.32225	0.332003	1.18332	0.377179	0.567215
			Mbs	8.25102	0.432633	0.675822	0.554042	0.54644	0.369996	0.318377			lncRNA:CR46078	0	0	0	0	0	0	0			lncRNA:CR46252	0	0	0	0	0	0	0			Srp68	0.700165	0.700546	2.00793	0.303877	0.765909	0	0.141707			Sesn	1.5126	1.01302	1.90092	0.627508	0.483503	0.0526435
			lncRNA:CR45052	0	0	0	0	0	0	0			asRNA:CR46074	0	0	0	0	0	0	0			lncRNA:CR46250	0	0	0	0	0	0	0			CG6762	3.19614	0.489368	1.08393	0.370363	0.723276	0	0.136438			Tomosyn	31.6907	0.237001	0.339336	0.78865	0.501737	0.704929
			amn	0.0676698	0.405569	0.931809	0.151952	0.201912	0	0.126667			CG31087	0	0	0	0	0	0	0			lncRNA:CR46035	0.0854961	0.0662413	1.28745	0.014563	0.325295	0.230725	-0.00210206			Irk2	59.024	0.542509	0.621445	0.572315	0.599949	0.846919	0.287605			unc-119	33.0606	0.294915	0.339057	0.908259	0.43193	0.691407
			CG43396	0	0	0	0	0	0	0			tRNA:Gly-TCC-1-2	0	0	0	0	0	0	0			lncRNA:CR44790	0	0	0	0	0	0	0			Synd	11.0328	0.270227	0.577358	0.54018	0.610354	0.915635	0.0952363			spdi	2.64352	0.703642	1.17586	0.775809	0.452709	0.0450859
			snoRNA:Pi4KIIalpha-a	0	0	0	0	0	0	0			tRNA:Lys-CTT-2-1Psi	0	0	0	0	0	0	0			mt:ND2	4.64427	0.676153	1.07987	0.745758	0.352023	0.614457	0.546322			Gdap2	3.87264	0.538841	0.961094	0.463884	0.687162	0	0.290471			Rac1	16.8462	0.491494	0.532174	1.00686	0.435886	0.445876
			lncRNA:CR44612	0.00405749	0.0213444	0.220863	0.00604004	0.0576882	0	0.00074263			lncRNA:CR46076	0	0	0	0	0	0	0			asRNA:CR45929	0	0	0	0	0	0	0			CG9804	2.09448	0.560439	1.74631	0.2893	0.773222	0	0.0741569			Pka-C1	56.0993	0.186647	0.29335	0.704182	0.484066	0.738811
			lncRNA:CR44595	0.161928	0.313701	0.918744	0.118913	0.217332	0	0.0769717			lncRNA:CR46001	0	0	0	0	0	0	0			CG12259	0.810259	0.300912	2.26801	0.219949	0.768566	0.537558	0.0801317			betaggt-I	0.986883	0.518782	1.84704	0.283342	0.777947	0	0.0661868			kek1	67.4381	0.392373	0.320158	1.09966	0.334157	0.585056
			scaRNA:PsiU2-55	0	0	0	0	0	0	0			CG31088	0	0	0	0	0	0	0			asRNA:CR44818	0	0	0	0	0	0	0			hpo	0.969882	0.683887	2.06052	0.271402	0.790083	0	0.127221			CG3655	12.6974	0.49401	1.01444	0.846293	0.426701	0.454549
			CG1358	9.70879	0.507355	1.00188	0.569121	0.536439	0.364607	0.35479			tRNA:Gln-TTG-1-3	0	0	0	0	0	0	0			CR46178	0	0	0	0	0	0	0			Amacr	2.22099	0.435187	1.14983	0.342242	0.736365	0	0.0832061			cno	2.91379	0.706343	1.54596	0.636356	0.536017	0.133625
			spg	1.08734	0.722775	2.35609	0.48734	0.64112	0.185671	0.402841			CG31465	0	0	0	0	0	0	0			lncRNA:CR44791	0	0	0	0	0	0	0			CG11560	0.327528	0.655572	2.88043	0.284011	0.785295	0	0.137073			CG32264	119.214	0.279494	0.237739	1.31335	0.274954	0.492626
			CG45067	0.0160743	0.154228	0.441726	0.0436434	0.0908863	0	0.0215464			CG31077	0	0	0	0	0	0	0			asRNA:TS15	0	0	0	0	0	0	0			CG6937	0.537438	0.744816	2.60799	0.257475	0.798866	0	0.107784			Tet	42.3802	0.255454	0.287028	1.02298	0.350456	0.588191
			PAN3	40.8312	0.264481	0.327626	0.778735	0.462616	0.846843	0.22822			CG31076	0	0	0	0	0	0	0			lncRNA:CR46248	0	0	0	0	0	0	0			Irk3	10.7657	0.484867	1.38602	0.372681	0.731032	0.330842	0.13678			alpha-Man-IIb	4.70467	0.633977	0.97862	0.731977	0.544296	0.139311
			Alg-2	21.8337	0.212562	0.424425	0.760522	0.428517	0.730997	0.154172			CG31482	0	0	0	0	0	0	0			asRNA:CR44793	0	0	0	0	0	0	0			Tor	0.265431	0.681315	3.13077	0.218268	0.828565	0	0.0780866			lawc	12.6087	0.423631	0.497336	0.964379	0.392679	0.446589
			Psc	4.6477	0.389479	0.982319	0.499374	0.502737	0.185671	0.188461			tRNA:Thr-AGT-1-7	0	0	0	0	0	0	0			lncRNA:CR44819	0	0	0	0	0	0	0			L2HGDH	4.55768	0.38138	0.840825	0.449826	0.667292	0	0.121759			Abcd1	7.42582	0.775296	0.675149	1.44603	0.223925	0.0884607
			CG43844	0.0170617	0.155289	0.441726	0.0439436	0.0906589	0	0.0218312			Npc2a	22.1015	0.688966	1.01179	0.539755	0.426146	0.602812	0.83782			CG44812	0	0	0	0	0	0	0			CG2765	7.25632	0.290285	0.845989	0.483302	0.654349	0.189767	0.0786599			egh	30.4133	0.318126	0.334504	1.1017	0.333762	0.572366
			Cc2d2a	0.00901196	0.0835654	0.220863	0.0236474	0.0440728	0	0.0126777			asRNA:CR44067	0.0122767	0.0185819	0.441726	0.00525832	0.0933515	0	0.00500852			bin3	3.30672	0.72208	0.913607	0.709927	0.499577	0.614457	0.703844			Arc42	4.19195	0.427313	1.17443	0.336843	0.740096	0	0.0788642			IntS6	4.86239	0.845966	0.789849	1.17686	0.298078	0.106233
			lncRNA:CR44619	0.0501982	0.186782	1.03779	0.0570348	0.259826	0	0.0365724			asRNA:CR46071	0	0	0	0	0	0	0			Dlip2	1.31216	0.776206	1.59344	0.586692	0.550324	0.537558	0.390534			Setd3	0.299962	0.749803	3.30769	0.212698	0.83283	0	0.0887788			asRNA:CR44030	0.117227	0.784839	2.13156	0.249615	0.436946	0
			lncRNA:CR44606	0.0106327	0.0688444	0.212391	0.0202588	0.0466145	0	0.00876798			tRNA:Asn-GTT-1-10	0	0	0	0	0	0	0			lncRNA:CR44801	0	0	0	0	0	0	0			l(1)G0289	13.8519	0.319638	0.622763	0.454222	0.661204	0.91464	0.0948671			CG8369	1.55487	1.16474	1.5967	0.611142	0.335174	0.0653683
			NetB	8.51814	0.637788	0.951155	0.568806	0.508065	0.350779	0.443322			TwdlR	0	0	0	0	0	0	0			lncRNA:CR46249	0	0	0	0	0	0	0			Fib	0.785982	0.555785	2.26119	0.271379	0.788992	0	0.0886127			Hr38	32.0565	1.09329	0.735379	1.36966	0.219326	0.421853
			asRNA:CR44416	0	0	0	0	0	0	0			CR46072	0	0	0	0	0	0	0			CG44815	0	0	0	0	0	0	0			RpL36	101.018	0.197852	0.314724	0.711711	0.519573	0.767278	0.0783794			Surf6	3.42467	0.550173	1.11873	0.70213	0.486171	0.196209
			Lrch	3.40669	0.439563	1.24397	0.508382	0.537029	0.185671	0.182709			CG31464	0	0	0	0	0	0	0			lncRNA:CR44808	0	0	0	0	0	0	0			CG3434	0.694971	0.606232	2.47166	0.236628	0.813141	0	0.0587609			CG43795	4.64124	0.983871	1.14157	1.14871	0.299108	0.0359586
			Sin3A	8.95667	0.293204	0.57859	0.555352	0.538638	0.408433	0.122779			tRNA:Gln-TTG-1-2	0	0	0	0	0	0	0			lncRNA:CR44805	0	0	0	0	0	0	0			zda	4.34544	0.312248	0.885907	0.425062	0.684508	0	0.0760739			CG30419	8.4983	0.76222	1.02333	1.31674	0.27294	0.152744
			CG3744	7.00774	0.3688	0.723562	0.588093	0.553673	0.310531	0.237191			CG31068	0	0	0	0	0	0	0			lncRNA:CR44817	0	0	0	0	0	0	0			ND-13A	19.2576	0.218867	0.486694	0.642099	0.60134	0.761086	0.128227			dpr1	37.4092	0.588394	0.669745	1.02356	0.372364	0.527168
			lncRNA:CR44787	0	0	0	0	0	0	0			asRNA:CR45944	0	0	0	0	0	0	0			lncRNA:CR45269	0	0	0	0	0	0	0			CG5543	0.596079	0.591149	2.43068	0.234235	0.815248	0	0.0604508			DopEcR	60.9675	0.243532	0.260525	1.10873	0.380375	0.595312
			CR41320	0.371703	0.673561	1.98275	0.278738	0.537061	0.123727	0.186957			lncRNA:CR46098	0	0	0	0	0	0	0			lncRNA:CR44804	0	0	0	0	0	0	0			RpS24	78.6265	0.237453	0.305276	0.659132	0.540036	0.818533	0.116367			gfzf	0.199687	0.703741	1.95354	0.24309	0.454063	0
			lncRNA:CR44789	0	0	0	0	0	0	0			CG31091	0	0	0	0	0	0	0			asRNA:CR44807	0	0	0	0	0	0	0			Lamp1	46.8322	0.227627	0.345647	0.556854	0.587227	0.906903	0.0764581			dpr6	29.3766	0.376291	0.421243	1.07114	0.343262	0.500321
			lncRNA:CR44393	0	0	0	0	0	0	0			tRNA:Thr-CGT-1-1	0	0	0	0	0	0	0			lncRNA:CR44800	0	0	0	0	0	0	0			wrapper	1.02362	0.706924	2.86563	0.238423	0.812907	0	0.0920621			lncRNA:CR46004	0.727792	1.16093	2.07324	0.616365	0.532133	0.0450859
			lncRNA:CR44387	0	0	0	0	0	0	0			lncRNA:CR44232	0.0104689	-0.00925312	0.220863	-0.00261845	0.0604114	0	-0.000136587			lncRNA:CR46258	0	0	0	0	0	0	0			Sec61alpha	8.23271	0.307663	0.793443	0.390178	0.696449	0.606368	0.0481098			bbx	0.230736	1.0182	2.58967	0.353169	0.552689	0.0450859
			CG44388	0	0	0	0	0	0	0			ATPsynepsilonL	0	0	0	0	0	0	0			lncRNA:CR44799	0	0	0	0	0	0	0			RpL24	101.89	0.168794	0.309371	0.687726	0.503012	0.855499	0.0507362			sick	4.73463	0.707928	1.2159	0.56099	0.601886	0.225496
			lncRNA:CR44748	0	0	0	0	0	0	0			asRNA:CR45896	0.00610112	0.0122235	0.220387	0.00346647	0.0597356	0.0624961	0.000240154			lncRNA:CR45265	0	0	0	0	0	0	0			RpL10Ab	100.875	0.23472	0.318154	0.651886	0.536292	0.810657	0.0981095			CG13300	5.16622	0.697149	1.03367	0.625868	0.527231	0.263538
			lncRNA:CR44788	0	0	0	0	0	0	0			igl	88.4466	-0.32051	0.623671	1.31034	0.219869	0.592377	-0.34506			lncRNA:CR44702	0.0130036	0.027566	0.247629	0.00856306	0.0701048	0	0.00111115			CG7841	1.89132	0.472692	1.24741	0.385949	0.723465	0	0.177809			cwo	5.93497	0.585934	0.776788	0.773644	0.44773	0.198127
			lncRNA:CR44389	0	0	0	0	0	0	0			lncRNA:CR46090	0	0	0	0	0	0	0			asRNA:CR45270	0	0	0	0	0	0	0			Ublcp1	1.67533	0.409165	1.49998	0.329858	0.74917	0	0.0736131			Rok	2.00711	0.972884	1.28	0.817658	0.42672	0.0450859
			CR44391	0	0	0	0	0	0	0			CG10932	1.23814	1.15069	1.97652	0.705275	0.504841	0.253141	2.26952			lncRNA:CR44802	0	0	0	0	0	0	0			VhaAC39-1	13.534	0.231487	0.511133	0.502821	0.63409	0.853438	0.0716838			Kdm5	5.96742	0.425395	0.918205	0.753887	0.475568	0.175679
			RpS14a	80.866	0.232796	0.232265	1.01084	0.340492	0.768681	0.311131			Ugt35D1	0	0	0	0	0	0	0			asRNA:CR45264	0	0	0	0	0	0	0			Mgstl	10.5885	0.32763	0.826814	0.44473	0.665703	0.537246	0.0761792			TrissinR	5.03136	0.804645	1.20225	0.985951	0.353952	0.167116
			Rbp9	40.3807	0.281183	0.417856	0.875656	0.446302	0.583849	0.443064			CG43293	0.0315632	0.10595	0.876587	0.0336171	0.223603	0.124965	0.0108636			asRNA:CR45268	0	0	0	0	0	0	0			Nph	4.51263	0.335223	0.932657	0.369685	0.718078	0	0.0697089			elB	17.8637	0.449661	0.555456	0.882294	0.400148	0.498977
			CG45088	0	0	0	0	0	0	0			CG31206	0	0	0	0	0	0	0			lncRNA:CR45602	0	0	0	0	0	0	0			Tbp	0.55296	0.624189	2.1609	0.301522	0.775994	0	0.171971			Dop2R	363.109	1.26231	0.504365	1.64614	0.270238	0.431013
			lncRNA:CR44446	0	0	0	0	0	0	0			MESK2	36.7429	0.174739	0.328207	0.615753	0.501489	0.979944	0.13869			lncRNA:CR44602	0.00832053	0.0200454	0.271832	0.00567245	0.0724012	0	0.00052741			RpS8	96.6728	0.144784	0.296482	0.739983	0.554899	0.747406	0.0984134			sol	6.28749	0.495353	0.767512	0.636088	0.527224	0.342987
			CG45089	0	0	0	0	0	0	0			asRNA:CR46054	0	0	0	0	0	0	0			lncRNA:CR45316	0	0	0	0	0	0	0			CG11655	3.33638	0.40757	1.16757	0.401678	0.706701	0	0.136768			CG14459	7.18747	0.794676	1.24773	1.32396	0.356516	0.0884023
			lncRNA:CR44734	0	0	0	0	0	0	0			asRNA:CR45829	0	0	0	0	0	0	0			asRNA:CR45271	0	0	0	0	0	0	0			pst	15.2263	0.281946	0.619918	0.439104	0.674365	0.957925	0.0744224			Son	2.98752	0.639274	1.1286	0.627844	0.579899	0.0970589
			lncRNA:CR44802	0	0	0	0	0	0	0			lncRNA:CR46079	0	0	0	0	0	0	0			lncRNA:CR45317	0	0	0	0	0	0	0			CG5828	0.726873	0.518132	2.42485	0.253478	0.801504	0	0.0529514			CG6770	90.485	0.349281	0.237332	1.68726	0.196637	0.387958
			CG44438	0	0	0	0	0	0	0			CG31016	0	0	0	0	0	0	0			lncRNA:CR44632	0.00643408	0.0200454	0.271832	0.00567245	0.0724012	0	0.00052741			CG4045	1.85945	0.411742	1.39885	0.289925	0.772336	0	0.0500628			Nckx30C	55.4465	0.234854	0.271676	1.01949	0.44625	0.654936
			lncRNA:CR44419	0	0	0	0	0	0	0			alpha-Man-Ic	0	0	0	0	0	0	0			CG16890	1.18581	0.345392	1.95301	0.158292	0.711961	0.537558	0.0283888			Sirt4	2.08205	0.370432	1.53789	0.333896	0.742992	0	0.059413			Not1	21.9464	0.286889	0.376871	0.819572	0.400247	0.716117
			SclA	0	0	0	0	0	0	0			tRNA:Thr-TGT-2-2	0	0	0	0	0	0	0			lncRNA:CR45318	0	0	0	0	0	0	0			CG13255	17.7956	0.369661	0.882536	0.352181	0.730559	0.621612	0.0797119			corto	25.7163	0.288741	0.403718	0.909787	0.480563	0.564322
			lncRNA:CR44492	0	0	0	0	0	0	0			CG31245	0	0	0	0	0	0	0			lncRNA:CR45262	0	0	0	0	0	0	0			koi	1.29036	0.413974	1.56228	0.283079	0.777749	0	0.0455085			RpS17	81.8889	0.208931	0.236222	1.02012	0.388678	0.61577
			lncRNA:CR44770	0	0	0	0	0	0	0			tRNA:Asp-GTC-1-9	0	0	0	0	0	0	0			wde	7.24366	0.170821	0.610711	0.300748	0.518747	0.92143	0.024537			Mst85C	1.29851	0.51738	1.71903	0.302261	0.766468	0	0.0952575			lncRNA:CR46208	0.0110877	0.0956688	0.334125	0.0259965	0.0704471	0
			lncRNA:CR44742	0	0	0	0	0	0	0			asRNA:CR46091	0	0	0	0	0	0	0			lncRNA:CR45293	0	0	0	0	0	0	0			OXA1L	0.309699	0.754788	3.1646	0.255735	0.806432	0	0.172771			lncRNA:CR45530	0.156394	0.806411	1.99027	0.304312	0.407743	0
			lncRNA:CR44491	0	0	0	0	0	0	0			tRNA:Ile-AAT-1-8	0	0	0	0	0	0	0			lncRNA:CR45291	0	0	0	0	0	0	0			opm	0.939356	0.511688	2.61522	0.288097	0.780455	0	0.0728829			beat-IIIc	26.158	0.684803	0.7004	1.3392	0.206874	0.330537
			lncRNA:CR44782	0	0	0	0	0	0	0			ppk31	0	0	0	0	0	0	0			lncRNA:CR45319	0	0	0	0	0	0	0			CG33941	6.78295	0.301282	0.724565	0.412881	0.684633	0	0.064887			Ac3	12.1484	0.36831	0.556786	0.820836	0.403106	0.335104
			lncRNA:CR44486	0	0	0	0	0	0	0			Gr2a	0.0271149	-0.0238353	0.408187	-0.00853057	0.0911999	0.0624961	-0.00758575			lncRNA:CR45292	0	0	0	0	0	0	0			sta	55.8013	0.207797	0.306254	0.587574	0.585053	0.890042	0.0944159			CG42524	3.4937	0.663305	1.08044	0.799408	0.32244	0.0151067
			beat-IIIa	0	0	0	0	0	0	0			GluRIIE	0	0	0	0	0	0	0			asRNA:CR45272	0	0	0	0	0	0	0			Mob3	2.66643	0.357526	1.16187	0.315001	0.752918	0	0.043837			dop	3.07984	0.59946	1.2642	0.5805	0.53997	0.153438
			lncRNA:CR44747	0	0	0	0	0	0	0			lncRNA:CR46063	0	0	0	0	0	0	0			lncRNA:CR44797	0	0	0	0	0	0	0			alpha4GT1	2.21537	0.319981	1.33348	0.365275	0.736277	0	0.0943695			lncRNA:CR46253	0.0118138	0.0819831	0.321006	0.023218	0.0725835	0
			CG44428	0	0	0	0	0	0	0			lncRNA:CR46077	0	0	0	0	0	0	0			NP15.6	18.2968	0.150416	0.424281	0.390298	0.603035	0.921729	0.0918296			Cyp28c1	4.00772	0.688547	2.14207	0.240351	0.811782	0	0.105985			bru1	8.33368	0.486607	0.7669	0.67049	0.447838	0.279832
			lncRNA:CR44745	0	0	0	0	0	0	0			PH4alphaNE3	0	0	0	0	0	0	0			CG11902	0.565384	0.371535	2.51181	0.24024	0.698813	0.460642	0.242559			Trl	1.95496	0.499575	2.05409	0.259527	0.798113	0	0.0597082			Mapmodulin	38.7508	0.276253	0.331234	0.975834	0.351379	0.621944
			lncRNA:CR44768	0	0	0	0	0	0	0			CG31055	0	0	0	0	0	0	0			lncRNA:CR44913	0.00643408	0.0200454	0.271832	0.00567245	0.0724012	0	0.00052741			Prosalpha5	3.63295	0.321446	0.912304	0.394797	0.70237	0	0.0736329			lncRNA:CR46206	0.00991365	0.0730141	0.320882	0.0206937	0.0745862	0
			lncRNA:CR44420	0	0	0	0	0	0	0			CG31013	0	0	0	0	0	0	0			CG45307	0	0	0	0	0	0	0			CG9132	0.815511	0.582155	1.87593	0.297706	0.779209	0	0.171048			tth	5.23528	0.503453	0.809136	0.693424	0.460577	0.199732
			CG44433	0	0	0	0	0	0	0			lncRNA:CR46080	0	0	0	0	0	0	0			lncRNA:CR44673	0.00750907	0.0150443	0.271246	0.00426643	0.0735207	0.0769183	0.000295575			Hs2st	0.375029	0.644603	2.81008	0.225895	0.824073	0	0.0971902			RpS23	37.6036	0.272645	0.323619	0.925548	0.445839	0.672612
			lncRNA:CR44769	0	0	0	0	0	0	0			PH4alphaSG1	0	0	0	0	0	0	0			CG45002	4.94746	0.615126	1.31705	0.684416	0.543265	0.691227	0.418721			CG15891	4.78576	0.46671	0.929932	0.342852	0.746263	0.324661	0.154116			Dop1R2	9.28334	0.626963	1.02927	0.634859	0.507512	0.346371
			lncRNA:CR44772	0	0	0	0	0	0	0			CR31054	0	0	0	0	0	0	0			CG17163	3.26565	0.666039	1.02441	0.58988	0.555482	0.691287	0.359756			MED11	1.83757	0.355485	1.28682	0.302235	0.767717	0	0.0616547			lncRNA:CR45597	0.0662111	0.408883	1.62185	0.114729	0.353243	0
			Piezo	1.76598	0.477342	1.72747	0.332126	0.627117	0.1232	0.154367			asRNA:CR46065	0	0	0	0	0	0	0			lncRNA:CR45274	0	0	0	0	0	0	0			RpS15Aa	42.0683	0.234802	0.356512	0.548812	0.618449	0.880783	0.117682			Nos	10.6226	0.635563	1.11461	0.840629	0.367985	0.248188
			lncRNA:CR44418	0	0	0	0	0	0	0			asRNA:CR46081	0	0	0	0	0	0	0			lncRNA:CR44596	0.00387424	0.00668012	0.271431	0.00189314	0.0754127	0.0769183	5.75292e-05			CG7600	0.433689	0.607645	2.37493	0.223526	0.826609	0	0.102014			CG14274	2.62786	1.30476	1.76005	0.868771	0.425544	0.114703
			lncRNA:CR44421	0	0	0	0	0	0	0			lncRNA:CR46015	0	0	0	0	0	0	0			Lnk	1.65342	0.793622	1.42233	0.647356	0.52467	0.614457	0.57831			Taf10	6.36926	0.252495	0.727	0.372809	0.712527	0.324661	0.0428351			RpL27	57.5918	0.224593	0.271306	0.935192	0.413474	0.661158
			CG44434	0	0	0	0	0	0	0			PH4alphaPV	0	0	0	0	0	0	0			lncRNA:CR44796	0	0	0	0	0	0	0			CG32448	4.30586	0.357394	0.918907	0.339233	0.74613	0	0.0957075			Rab3	19.6005	0.337535	0.456966	0.86192	0.392223	0.524596
			lncRNA:CR44743	0	0	0	0	0	0	0			CG31099	0	0	0	0	0	0	0			lncRNA:CR44798	0	0	0	0	0	0	0			CG13926	1.03237	0.421607	1.7195	0.24888	0.804224	0	0.0452249			Pvf3	58.8199	0.40692	0.320786	1.37196	0.28158	0.497868
			Prosalpha4T1	0	0	0	0	0	0	0			CG31697	0	0	0	0	0	0	0			lncRNA:CR45310	0	0	0	0	0	0	0			myo	23.2058	0.279372	0.501586	0.424215	0.685303	0.919789	0.093344			eag	18.1084	0.279012	0.625129	0.764865	0.374422	0.555485
			lncRNA:CR44780	0	0	0	0	0	0	0			CG32073	0	0	0	0	0	0	0			lncRNA:CR45287	0	0	0	0	0	0	0			Trx-2	18.1074	0.247691	0.496039	0.483574	0.64617	0.867431	0.0877908			corolla	0.00389244	0.0511907	0.160628	0.014486	0.0340891	0
			fz	11.5086	0.576853	0.995253	0.635675	0.355756	0.520196	0.446987			tRNA:Asp-GTC-1-7	0	0	0	0	0	0	0			lncRNA:CR45309	0	0	0	0	0	0	0			Syx16	1.58268	0.392967	1.54185	0.270061	0.788248	0	0.0450778			CG42674	20.1968	0.549813	0.612704	1.14348	0.400503	0.388359
			lncRNA:CR44423	0	0	0	0	0	0	0			CG32081	0	0	0	0	0	0	0			lncRNA:CR45280	0	0	0	0	0	0	0			Pfk	15.5385	0.2515	0.517647	0.402484	0.698632	0.937351	0.0713131			Polr2A	6.86226	0.704624	0.697549	1.27019	0.365886	0.164903
			CG43288	0	0	0	0	0	0	0			lncRNA:CR46019	0	0	0	0	0	0	0			lncRNA:CR45619	0	0	0	0	0	0	0			CG17691	12.4442	0.309888	0.588848	0.442436	0.68564	0.90765	0.133013			l(3)L1231	14.3357	0.310387	0.469483	0.701073	0.471871	0.620622
			lncRNA:CR44498	0.187342	0.165551	0.697862	0.101358	0.229508	0	0.0535696			CG31008	0	0	0	0	0	0	0			lncRNA:CR45278	0	0	0	0	0	0	0			Socs36E	5.32435	0.261709	0.873447	0.402065	0.716233	0	0.0952429			eIF4EHP	28.2373	0.282729	0.381913	0.825853	0.405416	0.686022
			lncRNA:CR44499	0	0	0	0	0	0	0			asRNA:CR46082	0	0	0	0	0	0	0			lncRNA:CR45289	0	0	0	0	0	0	0			RhoGAP5A	0.662433	0.491921	2.00769	0.330827	0.766561	0	0.195934			Orc1	0.0107654	0.102461	0.321256	0.0289944	0.0681612	0
			lncRNA:CR44415	0	0	0	0	0	0	0			CG31680	0	0	0	0	0	0	0			lncRNA:CR45277	0	0	0	0	0	0	0			CG32276	12.9526	0.221333	0.533033	0.46143	0.665928	0.839462	0.0694063			lncRNA:CR46231	0.00469324	0.040282	0.160628	0.011399	0.0364539	0
			lncRNA:CR44497	0	0	0	0	0	0	0			CG31010	0	0	0	0	0	0	0			lncRNA:CR45439	0	0	0	0	0	0	0			Irp-1B	1.68206	0.407347	1.35102	0.284936	0.782575	0	0.0862606			CG42797	1.69451	0.70497	1.68302	0.481262	0.592237	0.0450859
			CG10914	1.19719	0.738853	2.06237	0.278302	0.617602	0.185671	0.172869			lncRNA:CR46014	0	0	0	0	0	0	0			asRNA:CR45305	0	0	0	0	0	0	0			CG17726	0.767231	0.451194	2.21899	0.225306	0.822412	0	0.0431025			beat-Ic	52.4141	0.624339	0.817039	1.28817	0.3212	0.435847
			pHCl-1	18.235	0.318912	0.84979	0.784945	0.38173	0.641191	0.34616			lncRNA:CR46017	0	0	0	0	0	0	0			lncRNA:CR45288	0	0	0	0	0	0	0			lncRNA:CR44854	0.512574	0.809005	1.09065	0.503251	0.309956	0	0.324183			Klp98A	8.88237	0.381042	0.587444	0.710043	0.486927	0.406027
			lncRNA:CR44615	0	0	0	0	0	0	0			asRNA:CR46018	0	0	0	0	0	0	0			asRNA:CR45604	0	0	0	0	0	0	0			Rab35	7.82241	0.239409	0.709055	0.375409	0.709741	0.581781	0.0358845			CG42392	66.7543	0.213859	0.256472	0.920688	0.382651	0.666976
			CG44439	0	0	0	0	0	0	0			tplus3b	0	0	0	0	0	0	0			lncRNA:CR45314	0	0	0	0	0	0	0			CG7149	6.0266	0.455888	1.78999	0.259172	0.796534	0.642128	0.0470726			Alp1	0.00559088	0.0243116	0.160628	0.0068797	0.0399862	0
			lncRNA:CR44432	0	0	0	0	0	0	0			CG31921	0.0056401	0.0503317	0.220863	0.0142429	0.0512334	0	0.00434498			lncRNA:CR45304	0	0	0	0	0	0	0			Ssadh	62.5771	0.179392	0.502671	0.600267	0.62749	0.767708	0.082409			OtopLc	7.10249	0.423138	0.748959	0.781945	0.52997	0.22153
			lncRNA:CR44616	0	0	0	0	0	0	0			lncRNA:CR45754	0	0	0	0	0	0	0			Mic26-27	35.2186	0.101297	0.296378	0.379767	0.64836	0.998452	0.030073			CG13364	10.6377	0.234067	0.582817	0.407085	0.689366	0.881464	0.0499063			Kdm2	3.60234	0.674422	0.966445	0.9188	0.353485	0.0839407
			lncRNA:CR44692	0	0	0	0	0	0	0			Mur29B	0	0	0	0	0	0	0			lncRNA:CR45282	0	0	0	0	0	0	0			CG13751	5.98876	0.242898	0.736852	0.400518	0.707133	0	0.0686612			lncRNA:CR46250	0.00409229	0.0379858	0.160628	0.0107492	0.0369572	0
			Graf	11.6197	0.32707	0.514219	0.69456	0.53196	0.626601	0.275675			Spn28Da	0	0	0	0	0	0	0			lncRNA:CR45303	0	0	0	0	0	0	0			MED6	2.14967	0.365902	1.34179	0.264182	0.798647	0	0.0827394			Drak	8.55369	0.728986	0.737875	1.08479	0.369447	0.284812
			lncRNA:CR44522	0	0	0	0	0	0	0			CG31204	0	0	0	0	0	0	0			lncRNA:CR45313	0	0	0	0	0	0	0			CG13220	10.5836	0.189232	0.623198	0.427847	0.694932	0.849065	0.0617191			CG45676	0.0157053	0.100902	0.321097	0.028575	0.0687818	0
			lncRNA:CR44414	0	0	0	0	0	0	0			lncRNA:CR45826	0	0	0	0	0	0	0			lncRNA:CR45286	0	0	0	0	0	0	0			mrt	0.816844	0.380578	1.90847	0.276168	0.795487	0	0.103545			mt:lrRNA	158.451	0.442126	0.780843	0.594895	0.487549	0.766177
			lncRNA:CR44409	0	0	0	0	0	0	0			CG45765	0	0	0	0	0	0	0			clu	1.96952	0.621743	1.24413	0.509869	0.56427	0.61448	0.294835			Usp47	1.0528	0.473151	1.72662	0.246283	0.814117	0	0.116668			CG9705	5.11683	0.437598	0.837995	0.568561	0.593307	0.203182
			S6KL	2.63156	0.4535	1.49512	0.530186	0.56131	0.185671	0.294739			tRNA:Thr-AGT-1-1	0	0	0	0	0	0	0			lncRNA:CR45605	0	0	0	0	0	0	0			Prip	1.77874	2.01473	1.33126	1.00867	0.0869001	0	1.78453			Tm1	33.8844	0.233874	0.338137	0.811512	0.43698	0.685018
			lncRNA:CR43282	0	0	0	0	0	0	0			Mst27D	0	0	0	0	0	0	0			lncRNA:CR44944	0	0	0	0	0	0	0			Mic26-27	16.2215	0.186114	0.490742	0.413505	0.683443	0.888422	0.0339041			Sfmbt	0.495376	0.961083	2.23616	0.435113	0.579104	0.0450859
			lncRNA:CR44691	0	0	0	0	0	0	0			lncRNA:CR46062	0	0	0	0	0	0	0			lncRNA:CR45285	0	0	0	0	0	0	0			ttk	2.11211	0.296397	1.17036	0.273677	0.786546	0	0.0380007			Ac13E	2.78572	0.733012	1.26868	0.688594	0.43831	0.0807331
			lncRNA:CR44617	0	0	0	0	0	0	0			tRNA:Asp-GTC-1-8	0	0	0	0	0	0	0			lncRNA:CR44614	0	0	0	0	0	0	0			RpS27	115.078	0.179555	0.320226	0.460519	0.650962	0.902018	0.0500461			lncRNA:CR46197	0.0039608	0.0103844	0.160628	0.00293859	0.0431115	0
			lncRNA:CR44413	0	0	0	0	0	0	0			CG31698	0	0	0	0	0	0	0			lncRNA:CR44616	0	0	0	0	0	0	0			c11.1	0.406466	0.476756	2.74517	0.166387	0.867998	0	0.0331151			MtnF	31.5586	0.353069	0.504634	0.660253	0.522893	0.52655
			IntS3	5.90342	0.422936	0.764154	0.602543	0.453448	0.233574	0.296898			Ppi1	0	0	0	0	0	0	0			lncRNA:CR45283	0	0	0	0	0	0	0			Ptp61F	1.42993	0.333365	1.46629	0.225845	0.821915	0	0.0328457			CG43902	13.9542	0.454369	0.919071	0.660919	0.418952	0.370575
			lncRNA:CR44443	0	0	0	0	0	0	0			lncRNA:CR45972	0.0298583	0.0704038	0.714281	0.0179809	0.169611	0.12495	0.00635118			lncRNA:CR44942	0	0	0	0	0	0	0			Rab18	8.55425	0.214635	0.654385	0.347049	0.729818	0.611333	0.0315321			Ac78C	4.3754	0.783178	0.88612	0.990493	0.202522	0.101202
			lncRNA:CR44618	0	0	0	0	0	0	0			tRNA:Asp-GTC-1-3	0	0	0	0	0	0	0			lncRNA:CR45614	0	0	0	0	0	0	0			CG15210	3.08016	0.346753	1.51952	0.21973	0.826802	0	0.0360029			clu	3.61008	0.771758	1.10031	1.05949	0.356219	0.0763868
			lncRNA:CR44689	0	0	0	0	0	0	0			lncRNA:CR44068	0.00903404	-0.00382553	0.441401	-0.00108028	0.121684	0.0624961	-8.98448e-05			CG10713	0.966346	0.849296	2.09076	0.485171	0.638621	0.537558	0.356306			CG16890	0.642139	0.43088	2.58427	0.187599	0.85259	0	0.0410841			CR46189	0	0	0	0	0	0
			lncRNA:CR44412	0	0	0	0	0	0	0			lncRNA:CR46016	0	0	0	0	0	0	0			lncRNA:CR44621	0	0	0	0	0	0	0			CG3176	1.91535	0.347498	1.35847	0.262957	0.794784	0	0.0500628			na	2.91553	0.582715	1.20584	0.565168	0.48849	0.0994291
			lncRNA:CR44767	0	0	0	0	0	0	0			tRNA:Trp-CCA-2-1	0	0	0	0	0	0	0			lncRNA:CR45311	0	0	0	0	0	0	0			Akr1B	16.0614	0.201846	0.6266	0.343505	0.732979	0.935328	0.030446			lncRNA:CR45347	1.00521	0.999933	1.92209	0.6533	0.508822	0.0450859
			lncRNA:CR44773	0	0	0	0	0	0	0			CG31835	0	0	0	0	0	0	0			lncRNA:CR44615	0	0	0	0	0	0	0			CG17027	5.64741	0.352421	1.82413	0.244468	0.810693	0.302981	0.0502057			IP3K2	0.0145326	0.0592664	0.298751	0.0176198	0.0769634	0
			eIF3d1	8.9778	0.386448	0.714424	0.541199	0.51249	0.343217	0.2095			CG31115	0	0	0	0	0	0	0			lncRNA:CR45301	0	0	0	0	0	0	0			Abcd1	1.50569	0.298224	1.34743	0.226642	0.823055	0	0.0442652			Paf-AHalpha	6.50111	0.65704	0.715942	1.09322	0.370272	0.149515
			lncRNA:CR44783	0	0	0	0	0	0	0			tRNA:Asp-GTC-1-2	0	0	0	0	0	0	0			lncRNA:CR44618	0	0	0	0	0	0	0			CG15385	0.525059	0.510183	2.68884	0.18255	0.85588	0	0.0459133			hep	8.82822	0.366899	0.608012	0.77467	0.416065	0.33557
			lncRNA:CR44445	0	0	0	0	0	0	0			lncRNA:CR46083	0	0	0	0	0	0	0			lncRNA:CR45607	0	0	0	0	0	0	0			CG31548	9.6069	0.25566	0.760315	0.32281	0.751368	0.600702	0.0502945			lncRNA:CR45475	0.0140443	0.14066	0.481715	0.0398153	0.105063	0
			lncRNA:CR44796	0	0	0	0	0	0	0			CG45764	0	0	0	0	0	0	0			lncRNA:CR44626	0	0	0	0	0	0	0			Edem2	1.78641	0.32205	1.46222	0.216883	0.828312	0	0.0268822			lncRNA:CR46205	0	0	0	0	0	0
			lncRNA:CR44430	0	0	0	0	0	0	0			lncRNA:CR44443	0	0	0	0	0	0	0			CG44622	0	0	0	0	0	0	0			PolE4	0.591866	0.40803	2.2794	0.237851	0.822481	0	0.1094			lncRNA:CR45610	0.00635868	0.0235869	0.160628	0.00667463	0.040148	0
			asRNA:CR44793	0	0	0	0	0	0	0			lncRNA:CR44455	0	0	0	0	0	0	0			asRNA:CR45611	0	0	0	0	0	0	0			CG9338	3.41935	1.34263	0.932575	0.980088	0.105329	0.193136	1.19051			lncRNA:CR46216	0	0	0	0	0	0
			asRNA:CR44375	0	0	0	0	0	0	0			lncRNA:CR46088	0	0	0	0	0	0	0			lncRNA:CR44795	0	0	0	0	0	0	0			CG42445	1.84857	0.3232	1.27067	0.257206	0.799423	0	0.0463939			SoxN	14.0622	0.741774	0.873466	1.04131	0.343443	0.245312
			asRNA:CR44427	0	0	0	0	0	0	0			asRNA:CR46089	0	0	0	0	0	0	0			CG44623	0	0	0	0	0	0	0			ClpP	3.02069	0.243885	0.987814	0.269266	0.788699	0	0.0261393			IA-2	337.05	0.383639	0.359197	0.951973	0.392983	0.627579
			CG44435	0	0	0	0	0	0	0			lncRNA:CR46053	0	0	0	0	0	0	0			lncRNA:CR45609	0	0	0	0	0	0	0			Tsp86D	1.36352	1.55123	1.18365	0.963356	0.113298	0	1.2303			lncRNA:CR46214	0	0	0	0	0	0
			lncRNA:CR44775	0	0	0	0	0	0	0			lncRNA:CR44432	0	0	0	0	0	0	0			lncRNA:CR45606	0	0	0	0	0	0	0			Corp	0.656984	1.67542	1.33627	0.862137	0.134266	0	1.16628			CR46188	0	0	0	0	0	0
			lncRNA:CR44795	0	0	0	0	0	0	0			CG32079	0	0	0	0	0	0	0			lncRNA:CR44617	0	0	0	0	0	0	0			CG14817	8.15505	0.195598	0.646611	0.344655	0.735361	0.893353	0.0324466			lncRNA:CR46242	0	0	0	0	0	0
			lncRNA:CR44797	0	0	0	0	0	0	0			lncRNA:CR44453	0	0	0	0	0	0	0			lncRNA:CR45610	0	0	0	0	0	0	0			mRpS17	1.30796	0.295842	1.44669	0.212612	0.832015	0	0.0256012			lncRNA:CR46241	0	0	0	0	0	0
			CG44406	0	0	0	0	0	0	0			CG31050	0	0	0	0	0	0	0			lncRNA:CR45302	0	0	0	0	0	0	0			CG31441	0.591927	0.459662	2.62728	0.15847	0.874188	0	0.0316881			lncRNA:CR46207	0	0	0	0	0	0
			lncRNA:CR44791	0	0	0	0	0	0	0			CG42577	0	0	0	0	0	0	0			lncRNA:CR45608	0	0	0	0	0	0	0			tub	2.39572	0.46701	1.35782	0.224223	0.828831	0	0.10698			asRNA:CR46246	0	0	0	0	0	0
			CG43402	0	0	0	0	0	0	0			lncRNA:CR46086	0	0	0	0	0	0	0			lncRNA:CR45613	0	0	0	0	0	0	0			CG14621	0.191302	0.470906	3.50727	0.139368	0.889371	0	0.0279505			lncRNA:CR46240	0	0	0	0	0	0
			asRNA:CR44374	0	0	0	0	0	0	0			CG44433	0	0	0	0	0	0	0			CG44624	0	0	0	0	0	0	0			CG7632	0.973154	0.415723	2.38876	0.157842	0.875323	0	0.0370707			CR46190	0	0	0	0	0	0
			lncRNA:CR44798	0	0	0	0	0	0	0			CR45775	0	0	0	0	0	0	0			lncRNA:CR45618	0	0	0	0	0	0	0			spg	0.707225	0.38962	1.50208	0.269236	0.46547	0	0.0849091			Syt1	122.283	0.181401	0.216069	0.964943	0.399276	0.642823
			asRNA:CR44841	0.292219	0.470599	1.59884	0.237229	0.433014	0	0.177529			lncRNA:CR46087	0	0	0	0	0	0	0			asRNA:CR45300	0	0	0	0	0	0	0			Eato	0.427973	0.434562	2.74274	0.189528	0.851693	0	0.0449169			lncRNA:CR46209	0	0	0	0	0	0
			alt	10.4122	0.283776	0.680412	0.644479	0.575588	0.371424	0.207263			sunn	0	0	0	0	0	0	0			lncRNA:CR45615	0	0	0	0	0	0	0			eIF2Balpha	1.51165	0.28579	1.33768	0.236323	0.815257	0	0.033843			lncRNA:CR46210	0	0	0	0	0	0
			lncRNA:CR44380	0	0	0	0	0	0	0			lncRNA:CR44451	0	0	0	0	0	0	0			eIF5B	4.59956	0.254167	0.848273	0.260663	0.738637	0.768088	0.0555971			Ufc1	4.78817	0.281607	0.900569	0.234792	0.817704	0	0.0477123			CG46244	0	0	0	0	0	0
			lncRNA:CR44520	0	0	0	0	0	0	0			CG32061	0	0	0	0	0	0	0			Gyc76C	0.00661442	0.0309541	0.271832	0.00875941	0.0699492	0.0769217	0.0012776			Dbp21E2	0.250417	0.503524	3.58156	0.12995	0.89696	0	0.0360708			lncRNA:CR46243	0	0	0	0	0	0
			lncRNA:CR44799	0	0	0	0	0	0	0			lncRNA:CR44452	0	0	0	0	0	0	0			lncRNA:CR45299	0	0	0	0	0	0	0			CG34408	0.344764	0.473619	2.72403	0.15179	0.881129	0	0.0593502			faf	3.40645	0.652454	1.03274	0.763997	0.508409	0.105257
			CG43277	0	0	0	0	0	0	0			Prosalpha4T1	0	0	0	0	0	0	0			lncRNA:CR45626	0	0	0	0	0	0	0			sev	1.29483	0.287129	2.14254	0.21907	0.833488	0	0.0523864			lncRNA:CR46215	0	0	0	0	0	0
			SclB	0	0	0	0	0	0	0			asRNA:CR44427	0	0	0	0	0	0	0			lncRNA:CR44794	0	0	0	0	0	0	0			RpS20	119.351	0.196913	0.333535	0.406198	0.697712	0.905885	0.0668801			lncRNA:CR46203	0	0	0	0	0	0
			lncRNA:CR45098	0	0	0	0	0	0	0			CG32107	0	0	0	0	0	0	0			lncRNA:CR44567	0.00643408	0.0200454	0.271832	0.00567245	0.0724012	0	0.00052741			CG32512	2.61947	0.623665	0.612884	0.692428	0.20023	0	0.320951			CG46191	0	0	0	0	0	0
			CG45092	0	0	0	0	0	0	0			CG32087	0	0	0	0	0	0	0			CG11699	7.00262	0.169537	0.609042	0.265919	0.682127	0.844881	0.0473766			Sbp2	1.23535	0.303009	1.51497	0.184818	0.854968	0	0.038539			lncRNA:CR46213	0	0	0	0	0	0
			Dpp10	14.2003	0.286174	0.510179	0.732411	0.471313	0.473921	0.353171			tRNA:Phe-GAA-1-3	0	0	0	0	0	0	0			lncRNA:CR45617	0	0	0	0	0	0	0			Ubi-p63E	18.2355	0.150557	0.434485	0.340313	0.749995	0.965744	0.0505905			CR46274	0	0	0	0	0	0
			CG43291	0	0	0	0	0	0	0			lncRNA:CR45881	0	0	0	0	0	0	0			lncRNA:CR44761	0	0	0	0	0	0	0			RNaseZ	0.383086	0.442362	3.22856	0.130103	0.896521	0	0.0230849			CR46273	0	0	0	0	0	0
			lncRNA:CR43285	0	0	0	0	0	0	0			CR45771	0	0	0	0	0	0	0			CG44625	0	0	0	0	0	0	0			E(spl)m3-HLH	3.15567	0.324602	1.93931	0.20184	0.840713	0	0.0244775			lncRNA:CR46202	0	0	0	0	0	0
			Vha68-2	0.0521015	0.144167	0.85739	0.0414326	0.217741	0	0.0319899			tRNA:Gln-TTG-1-1	0	0	0	0	0	0	0			lncRNA:CR44731	0	0	0	0	0	0	0			PGRP-LC	0.820159	0.460043	2.94725	0.119104	0.905447	0	0.0299334			cv-c	0.502008	0.305594	1.36419	0.137038	0.383606	0
			lncRNA:CR43280	0	0	0	0	0	0	0			p38c	0	0	0	0	0	0	0			lncRNA:CR44762	0	0	0	0	0	0	0			MESR6	1.05864	0.333345	2.25705	0.177222	0.859602	0	0.0208973			lncRNA:CR46211	0	0	0	0	0	0
			lncRNA:CR45097	0	0	0	0	0	0	0			CG44435	0	0	0	0	0	0	0			lncRNA:CR44627	0	0	0	0	0	0	0			CG6638	0.999001	0.331595	1.7603	0.18102	0.859289	0	0.0502643			lncRNA:CR46198	0	0	0	0	0	0
			lncRNA:CR45096	0	0	0	0	0	0	0			CG44438	0	0	0	0	0	0	0			lncRNA:CR44729	0	0	0	0	0	0	0			CG4332	0.490947	1.09865	1.43168	0.545372	0.279564	0	0.413024			lncRNA:CR46196	0	0	0	0	0	0
			lncRNA:CR43298	0.00748382	0.000426933	0.220863	0.000120814	0.0624036	0	2.8619e-07			lncRNA:CR45752	0	0	0	0	0	0	0			lncRNA:CR44725	0	0	0	0	0	0	0			CG18598	2.13446	0.233945	2.1898	0.276337	0.7982	0	0.0632422			CG46193	0	0	0	0	0	0
			lncRNA:yar	0	0	0	0	0	0	0			CG44434	0	0	0	0	0	0	0			lncRNA:CR45616	0	0	0	0	0	0	0			CG13585	12.6902	0.156501	0.524187	0.393732	0.721077	0.845695	0.0541134			lncRNA:CR46200	0	0	0	0	0	0
			CG11885	2.81471	0.361269	1.06192	0.436374	0.532493	0.124414	0.221718			CG45770	0	0	0	0	0	0	0			asRNA:CR44724	0	0	0	0	0	0	0			Gbs-70E	0.618328	0.392573	2.69289	0.134256	0.893517	0	0.0265812			Paip2	13.1209	0.322237	0.489017	0.729072	0.480606	0.59176
			lncRNA:CR44407	0	0	0	0	0	0	0			lncRNA:CR45793	0	0	0	0	0	0	0			lncRNA:CR45574	0.00832053	0.0200454	0.271832	0.00567245	0.0724012	0	0.00052741			CG18528	0.375779	1.18787	1.52049	0.566861	0.273427	0	0.496976			lncRNA:CR46212	0	0	0	0	0	0
			lncRNA:CR44800	0	0	0	0	0	0	0			lncRNA:CR45756	0	0	0	0	0	0	0			lncRNA:CR45972	0.0367487	0.0866508	0.879116	0.0221303	0.208751	0.153785	0.00781684			slow	2.82812	1.44777	0.934424	1.01404	0.105105	0	1.49086			lncRNA:CR46199	0	0	0	0	0	0
			CR43240	0	0	0	0	0	0	0			tRNA:Thr-AGT-3-1Psi	0	0	0	0	0	0	0			lncRNA:CR45627	0	0	0	0	0	0	0			Pcl	0.359341	0.451207	3.25869	0.118273	0.906215	0	0.0324308			CG46192	0	0	0	0	0	0
			CR44383	0	0	0	0	0	0	0			beat-IIIa	0	0	0	0	0	0	0			lncRNA:CR45624	0	0	0	0	0	0	0			Scp2	10.2355	1.9153	1.04838	1.24441	0.0785371	0.268674	2.82602			CG34279	0.328403	0.887143	1.90467	0.379879	0.444222	0
			lncRNA:CR44794	0	0	0	0	0	0	0			CR45772	0	0	0	0	0	0	0			CG8861	23.099	0.797678	1.23158	0.653439	0.373854	0.691305	0.661603			RpL36A	67.7649	0.195895	0.344952	0.328717	0.767722	0.934837	0.0845299			SdicA	0	0	0	0	0	0
			lncRNA:CR44801	0	0	0	0	0	0	0			lncRNA:CR45757	0	0	0	0	0	0	0			lncRNA:CR44722	0	0	0	0	0	0	0			CG3803	1.09195	0.27345	1.86674	0.202456	0.843316	0	0.0411599			lncRNA:CR44024	14.4552	0.95971	1.38104	1.04799	0.324294	0.329884
			lncRNA:CR44790	0	0	0	0	0	0	0			lncRNA:CR44430	0	0	0	0	0	0	0			lncRNA:CR44721	0	0	0	0	0	0	0			PIG-S	0.233353	0.309468	1.66633	0.128318	0.564943	0	0.0218325			Dhc16F	0	0	0	0	0	0
			lncRNA:CR43238	0	0	0	0	0	0	0			Ir67c	0	0	0	0	0	0	0			lncRNA:CR44723	0	0	0	0	0	0	0			mRpL19	1.52723	0.264326	1.96312	0.165722	0.868624	0	0.015482			asRNA:CR46195	0	0	0	0	0	0
			MESK2	61.0719	0.163746	0.27088	0.779176	0.464781	0.831491	0.0972409			CR45777	0	0	0	0	0	0	0			lncRNA:CR44675	0	0	0	0	0	0	0			CG8326	0.179271	0.388567	3.59668	0.113379	0.909858	0	0.0184887			Drs	0	0	0	0	0	0
			CG43237	0	0	0	0	0	0	0			CG31205	0	0	0	0	0	0	0			lncRNA:CR44720	0	0	0	0	0	0	0			Bdp1	0.428716	0.37724	2.89524	0.125614	0.900141	0	0.0205733			SdicB	0	0	0	0	0	0
			lncRNA:CR43297	0	0	0	0	0	0	0			tplus3a	0	0	0	0	0	0	0			PSMG1	2.60184	0.774692	1.19365	0.658631	0.520174	0.614457	0.683218			htl	7.6442	0.246513	1.28938	0.192158	0.849203	0.324661	0.0220667			lncRNA:CR46239	0	0	0	0	0	0
			lncRNA:CR43274	0	0	0	0	0	0	0			Cpr30F	0	0	0	0	0	0	0			UQCR-11	87.5718	0.101961	0.197485	0.489872	0.593988	0.998283	0.0667272			RpL27A	174.837	0.147736	0.312275	0.337516	0.742182	0.911543	0.0365615			lncRNA:CR45388	0.236908	1.08002	1.7648	0.460851	0.330973	0
			CG43292	0.00857171	0.00192749	0.220863	0.000545443	0.0620648	0	5.84922e-06			lncRNA:CR45759	0	0	0	0	0	0	0			lncRNA:CR45673	0.0158	0.0509995	0.543663	0.0144319	0.14235	0.0769217	0.00180501			Arl1	2.85065	0.168689	1.02001	0.217289	0.833258	0	0.0292845			CR46279	0	0	0	0	0	0
			lncRNA:CR43270	0	0	0	0	0	0	0			CR45776	0	0	0	0	0	0	0			Arpc3A	5.06518	0.637364	0.817383	0.645731	0.5139	0.691227	0.473732			Miga	0.497575	1.00126	1.45612	0.4608	0.326313	0	0.308817			lncRNA:CR46234	0	0	0	0	0	0
			CG43230	0	0	0	0	0	0	0			CG44428	0	0	0	0	0	0	0			lncRNA:CR44629	0	0	0	0	0	0	0			mfrn	0.809079	0.225681	1.84682	0.13495	0.89289	0	0.0139789			SdicC	0	0	0	0	0	0
			RpS23	38.3297	0.172016	0.321415	0.759201	0.371858	0.795618	0.13543			lncRNA:CR45761	0	0	0	0	0	0	0			kcc	19.202	0.333871	0.397605	0.813162	0.361311	0.998254	0.298842			GC1	8.42172	0.164966	0.685082	0.195499	0.848719	0.329831	0.0289908			solo	0	0	0	0	0	0
			CG45087	0	0	0	0	0	0	0			kl-5	0	0	0	0	0	0	0			lncRNA:CR44683	0	0	0	0	0	0	0			CG17776	5.46692	0.170575	0.856179	0.200299	0.841359	0	0.0133315			lncRNA:CR46230	0	0	0	0	0	0
			CG43294	0	0	0	0	0	0	0			Ubc87F	0	0	0	0	0	0	0			lncRNA:CR44686	0	0	0	0	0	0	0			CCT6	1.15926	0.231612	1.6121	0.144432	0.885179	0	0.0124144			lncRNA:CR46252	0	0	0	0	0	0
			lncRNA:CR43956	0.0236225	0.144334	0.440966	0.040964	0.0937076	0	0.0301796			Acp33A	0	0	0	0	0	0	0			lncRNA:CR44630	0	0	0	0	0	0	0			eIF2gamma	2.44767	0.215567	1.23758	0.151782	0.879822	0	0.0173198			lncRNA:CR46233	0	0	0	0	0	0
			asRNA:CR43299	0	0	0	0	0	0	0			CG32086	0	0	0	0	0	0	0			lncRNA:CR44715	0	0	0	0	0	0	0			Mnt	3.48709	0.183048	1.01245	0.186129	0.85284	0	0.0159619			RpL9	40.4601	0.206453	0.317054	0.85386	0.38668	0.650588
			east	10.5562	0.305752	0.596992	0.642572	0.530096	0.459832	0.224557			crc	2.66535	0.488338	1.17631	0.342116	0.60387	0.499247	0.232184			lncRNA:CR44687	0	0	0	0	0	0	0			CG42336	2.38916	0.204164	1.34581	0.192321	0.849339	0	0.0209069			lncRNA:CR46236	0	0	0	0	0	0
			CG45099	0	0	0	0	0	0	0			Pgm2a	1.74779	0.393186	1.35214	0.296213	0.685314	0.436766	0.127732			lncRNA:CR44719	0	0	0	0	0	0	0			eIF2Bepsilon	0.51998	0.244473	2.21055	0.11679	0.90728	0	0.0139698			lncRNA:CR46227	0	0	0	0	0	0
			CG43271	0	0	0	0	0	0	0			CG32023	0	0	0	0	0	0	0			lncRNA:CR44631	0	0	0	0	0	0	0			Debcl	2.59918	0.178695	1.52775	0.159091	0.873881	0	0.0109035			lncRNA:CR46235	0	0	0	0	0	0
			CG45084	0	0	0	0	0	0	0			CG44426	0	0	0	0	0	0	0			lncRNA:CR44713	0	0	0	0	0	0	0			Lac	0.372151	1.16362	1.91786	0.501805	0.318525	0	0.434234			lncRNA:CR46115	0	0	0	0	0	0
			CG43290	0	0	0	0	0	0	0			S-Lap4	0	0	0	0	0	0	0			lncRNA:CR44688	0	0	0	0	0	0	0			CG6701	4.25269	0.135098	0.942378	0.163175	0.871428	0	0.0141203			Alp2	0	0	0	0	0	0
			lncRNA:CR44620	0	0	0	0	0	0	0			lncRNA:CR45888	0	0	0	0	0	0	0			lncRNA:CR44685	0	0	0	0	0	0	0			CG1998	7.75911	0.124379	0.722516	0.179638	0.857981	0.307942	0.0109613			nw	0	0	0	0	0	0
			CG45105	0	0	0	0	0	0	0			CR45780	0	0	0	0	0	0	0			lncRNA:CR44601	0	0	0	0	0	0	0			CG4872	0.901738	0.21161	1.7823	0.135358	0.89305	0	0.016244			lncRNA:CR46229	0	0	0	0	0	0
			Atg12	11.1346	0.29517	0.549886	0.597167	0.547066	0.490609	0.162982			CG32053	0	0	0	0	0	0	0			lncRNA:CR44684	0	0	0	0	0	0	0			CG1673	0.350458	1.07666	1.97841	0.368378	0.387142	0	0.25053			lncRNA:CR46228	0	0	0	0	0	0
			CG45086	0	0	0	0	0	0	0			lncRNA:CR45762	0	0	0	0	0	0	0			lncRNA:CR44712	0	0	0	0	0	0	0			Srp54	3.49105	0.116961	0.888799	0.147272	0.883323	0	0.00876899			lncRNA:CR46237	0	0	0	0	0	0
			lncRNA:CR44396	0.193471	0.588915	1.34281	0.243074	0.312343	0	0.262296			CG31668	0	0	0	0	0	0	0			lncRNA:CR44691	0	0	0	0	0	0	0			CG31522	1.70663	0.139888	1.61054	0.113262	0.910057	0	0.00860539			tinc	5.74255	0.471801	0.980719	0.711473	0.413093	0.229086
			lncRNA:CR43303	0	0	0	0	0	0	0			CG44437	0	0	0	0	0	0	0			lncRNA:CR44682	0	0	0	0	0	0	0			jnj	0.16553	0.279547	3.65635	0.0747523	0.940417	0	0.00786598			asRNA:CR46255	0	0	0	0	0	0
			CG45085	0	0	0	0	0	0	0			CG32071	0	0	0	0	0	0	0			lncRNA:CR44551	0	0	0	0	0	0	0			CG5783	0.586589	1.21726	1.20366	0.654552	0.221249	0	0.638732			lncRNA:CR46249	0	0	0	0	0	0
			CG42750	35.9326	0.373732	0.486031	0.698088	0.455593	0.719159	0.294238			CR32009	0	0	0	0	0	0	0			lncRNA:CR44821	0	0	0	0	0	0	0			RpL35A	72.7998	0.0840695	0.380548	0.269561	0.792053	0.905583	0.0105806			asRNA:CR46256	0	0	0	0	0	0
			Dp1	4.28157	0.479021	1.30774	0.494574	0.576073	0.185671	0.247097			CG32024	0	0	0	0	0	0	0			lncRNA:CR44714	0	0	0	0	0	0	0			Larp7	0.217437	0.23213	1.85096	0.10611	0.58301	0	0.0216068			lncRNA:CR45615	0	0	0	0	0	0
			lncRNA:CR43306	0	0	0	0	0	0	0			Su(Ste):CR45794	0	0	0	0	0	0	0			asRNA:CR45208	0.0119974	0.0309541	0.271832	0.00875941	0.0699492	0.0769217	0.0012776			Coq9	0.651839	0.1791	2.36806	0.0884598	0.929716	0	0.00880158			lncRNA:CR46248	0	0	0	0	0	0
			FoxP	32.4825	0.188493	0.336544	0.817815	0.393674	0.757547	0.188017			Su(Ste):CR45795	0	0	0	0	0	0	0			lncRNA:CR44751	0	0	0	0	0	0	0			CG32579	0.464582	0.164023	2.49075	0.0677679	0.945999	0	0.00474902			lncRNA:CR46257	0	0	0	0	0	0
			Pkc53E	83.2487	0.374117	0.333001	1.04416	0.414482	0.708803	0.840116			scyl	16.9253	0.211366	0.527641	0.475775	0.555414	0.96468	0.133343			lncRNA:CR44698	0	0	0	0	0	0	0			CG11378	6.19021	0.131328	1.82291	0.0968303	0.923075	0.330145	0.00491015			lncRNA:CR45616	0	0	0	0	0	0
			CG43221	0	0	0	0	0	0	0			CG31975	0	0	0	0	0	0	0			lncRNA:CR44689	0	0	0	0	0	0	0			Fkbp39	1.23944	0.107961	1.67499	0.0949103	0.924854	0	0.00704846			lncRNA:CR45619	0	0	0	0	0	0
			asRNA:CR43872	0.0152918	0.10491	0.441726	0.0296874	0.101761	0	0.0134203			lncRNA:CR45792	0	0	0	0	0	0	0			lncRNA:CR44754	0	0	0	0	0	0	0			Pcyt2	42.7527	0.101365	0.783711	0.13846	0.890073	0.959829	0.00555991			CR46272	0	0	0	0	0	0
			CG40486	0.0194837	0.094134	0.17204	0.0341977	0.0365167	0	0.0219698			CG32006	0	0	0	0	0	0	0			asRNA:CR45601	0	0	0	0	0	0	0			CG3609	5.21917	0.0879874	0.839297	0.104242	0.916978	0	0.00333346			CR46300	0	0	0	0	0	0
			CG43220	0	0	0	0	0	0	0			tRNA:Gln-CTG-2-5	0	0	0	0	0	0	0			lncRNA:CR44693	0	0	0	0	0	0	0			Strn-Mlck	0.780634	1.46475	1.57678	0.704873	0.281459	0	1.44322			lncRNA:CR46226	0	0	0	0	0	0
			lncRNA:CR44908	0.0130157	0.0920948	0.207657	0.0277185	0.0410879	0	0.0167765			Mst77Y-9	0	0	0	0	0	0	0			lncRNA:CR44692	0	0	0	0	0	0	0			CG33111	0.7953	1.05907	1.18886	0.551296	0.283216	0	0.51418			lncRNA:CR45617	0	0	0	0	0	0
			asRNA:CR43243	0	0	0	0	0	0	0			tRNA:Phe-GAA-1-6	0	0	0	0	0	0	0			lncRNA:CR44695	0	0	0	0	0	0	0			RNaseX25	3.56473	0.0524239	0.886263	0.0585692	0.953311	0	0.00128178			lncRNA:CR46224	0	0	0	0	0	0
			CG44008	0.032089	0.119331	0.600805	0.0468449	0.152616	0	0.0407475			Fum4	0	0	0	0	0	0	0			lncRNA:CR44750	0	0	0	0	0	0	0			lbm	2.18002	0.772012	1.82072	0.344969	0.41725	0	0.248577			14-3-3epsilon	169.768	0.155225	0.186131	0.924625	0.420473	0.664702
			tRNA:Leu-CAG-1-8	0	0	0	0	0	0	0			Psf2	0.106632	-0.00502699	0.224833	0.00676922	0.100245	0	0.000712046			lncRNA:CR44734	0	0	0	0	0	0	0			CG33958	4.11157	0.56953	0.478959	0.620367	0.344782	0.327921	0.65232			lncRNA:CR46299	0	0	0	0	0	0
			lncRNA:CR43304	0	0	0	0	0	0	0			Su(Ste):CR45796	0	0	0	0	0	0	0			lncRNA:CR44697	0	0	0	0	0	0	0			bbg	0.282466	0.767579	1.92613	0.275975	0.46123	0	0.212551			eIF5B	9.02963	0.629144	0.619378	0.98768	0.414815	0.350996
			CG43307	0	0	0	0	0	0	0			ovm	0	0	0	0	0	0	0			lncRNA:CR44652	0	0	0	0	0	0	0			AOX3	0.609249	0.640182	1.58578	0.282914	0.457528	0	0.18854			lncRNA:CR46259	0	0	0	0	0	0
			Ptr	0	0	0	0	0	0	0			CR32011	0	0	0	0	0	0	0			lncRNA:CR44820	0	0	0	0	0	0	0			MME1	0.346927	0.701718	1.65213	0.25943	0.468883	0	0.158111			CR46186	0	0	0	0	0	0
			EcR	14.6512	0.275592	0.485256	0.592633	0.457726	0.638447	0.181693			lncRNA:CR31840	0	0	0	0	0	0	0			lncRNA:CR44696	0	0	0	0	0	0	0			CG15784	0.431515	1.40753	1.39961	0.667374	0.21162	0	0.710004			slf	0.00425247	0.0360606	0.160628	0.0102044	0.0373805	0
			Frl	21.6208	0.25924	0.433789	0.711493	0.402143	0.584601	0.20922			chp	0	0	0	0	0	0	0			lncRNA:CR44736	0	0	0	0	0	0	0			Gmap	0.530972	0.906241	1.01126	0.595034	0.25224	0	0.41185			lncRNA:CR45614	0	0	0	0	0	0
			CG43308	0	0	0	0	0	0	0			JYalpha	0	0	0	0	0	0	0			lncRNA:CR44711	0	0	0	0	0	0	0			Gga	0.531731	0.619465	1.47481	0.262299	0.463065	0	0.108671			lncRNA:CR45613	0	0	0	0	0	0
			lncRNA:CR44698	0	0	0	0	0	0	0			CG45766	0	0	0	0	0	0	0			lncRNA:CR44735	0	0	0	0	0	0	0			CG17778	2.04486	0.856386	1.54308	0.582075	0.353359	0	0.871896			lncRNA:CR45936	0	0	0	0	0	0
			CG43235	0	0	0	0	0	0	0			emc	30.3636	0.134064	0.329262	0.511554	0.498399	0.964019	0.0774633			lncRNA:CR44753	0	0	0	0	0	0	0			yuri	0.284215	0.730409	2.3592	0.190236	0.519302	0	0.124806			lncRNA:CR46260	0	0	0	0	0	0
			lncRNA:CR43883	0.0173804	0.12701	0.220863	0.0359414	0.035328	0	0.0314681			asRNA:CR45894	0	0	0	0	0	0	0			lncRNA:CR44752	0	0	0	0	0	0	0			LanA	0.308886	0.761387	2.36324	0.19734	0.516591	0	0.174063			esg	0.00527888	0.0408635	0.160628	0.0115636	0.0363267	0
			lncRNA:CR44699	0	0	0	0	0	0	0			lncRNA:CR45790	0	0	0	0	0	0	0			Tfb5	0	0	0	0	0	0	0			lncRNA:CR43883	0.195999	0.607361	0.552789	0.36624	0.0906299	0	0.343528			lncRNA:CR45632	0	0	0	0	0	0
			lncRNA:CR44753	0.0773654	0.144569	0.543699	0.0884911	0.134039	0	0.115853			CG32102	0	0	0	0	0	0	0			lncRNA:CR44710	0	0	0	0	0	0	0			Cpr49Ae	0.552118	1.17588	2.43575	0.311308	0.438242	0	0.377608			Spf45	9.46996	0.297307	0.58279	0.560364	0.490276	0.3903
			lncRNA:CR44601	0	0	0	0	0	0	0			CG42809	0.0470189	0.0171854	0.337885	0.011205	0.112458	0	0.00196052			asRNA:CR44653	0	0	0	0	0	0	0			CG6910	80.1194	0.451537	1.57596	0.265505	0.471145	0.28608	0.131485			lncRNA:CR45937	0	0	0	0	0	0
			lncRNA:CR44630	0	0	0	0	0	0	0			CG32036	0	0	0	0	0	0	0			lncRNA:CR44709	0	0	0	0	0	0	0			CG31265	0	0	0	0	0	0	0			lncRNA:CR45622	0	0	0	0	0	0
			lncRNA:CR45103	0	0	0	0	0	0	0			asRNA:CR45892	0	0	0	0	0	0	0			lncRNA:CR44748	0	0	0	0	0	0	0			pre-mod(mdg4)-N	0	0	0	0	0	0	0			CG46270	0	0	0	0	0	0
			lncRNA:CR44886	0.0102471	0.12701	0.220863	0.0359414	0.035328	0	0.0314681			CG31661	0	0	0	0	0	0	0			lncRNA:CR44737	0	0	0	0	0	0	0			lncRNA:CR45954	0	0	0	0	0	0	0			CG4836	0	0	0	0	0	0
			lncRNA:CR44974	0.0182681	0.0474386	0.401523	0.0163847	0.112072	0	0.00469208			lncRNA:CR45788	0	0	0	0	0	0	0			lncRNA:CR44640	0	0	0	0	0	0	0			CG31269	0	0	0	0	0	0	0			Cad87A	3.82836	0.795038	1.36209	0.928748	0.356093	0.0436241
			lncRNA:CR44700	0	0	0	0	0	0	0			mil	0	0	0	0	0	0	0			lncRNA:CR44681	0	0	0	0	0	0	0			CG31268	0	0	0	0	0	0	0			ltl	0	0	0	0	0	0
			lncRNA:CR44602	0	0	0	0	0	0	0			CR45773	0	0	0	0	0	0	0			asRNA:CR44592	0	0	0	0	0	0	0			lncRNA:CR45993	0	0	0	0	0	0	0			asRNA:CR46261	0	0	0	0	0	0
			lncRNA:CR44604	0	0	0	0	0	0	0			lncRNA:CR45791	0	0	0	0	0	0	0			lncRNA:CR44587	0	0	0	0	0	0	0			lncRNA:CR45991	0	0	0	0	0	0	0			lncRNA:CR45634	0	0	0	0	0	0
			lncRNA:CR43263	0	0	0	0	0	0	0			asRNA:CR45890	0	0	0	0	0	0	0			lncRNA:CR44694	0	0	0	0	0	0	0			CG31267	0	0	0	0	0	0	0			Dscam1	5.48822	0.602805	1.25675	0.951829	0.400339	0.164325
			CG43312	0	0	0	0	0	0	0			CG32037	0	0	0	0	0	0	0			lncRNA:CR44739	0	0	0	0	0	0	0			lncRNA:CR45976	0	0	0	0	0	0	0			Df31	26.5542	0.256597	0.436006	0.603457	0.553358	0.596769
			lncRNA:CR44902	0.00903153	0.090594	0.220863	0.0256363	0.0426046	0	0.015077			lncRNA:CR45893	0	0	0	0	0	0	0			lncRNA:CR44585	0	0	0	0	0	0	0			tRNA:Thr-CGT-1-3	0	0	0	0	0	0	0			Osi10a	0.00705103	0.05127	0.160628	0.0145084	0.0340721	0
			lncRNA:CR44696	0	0	0	0	0	0	0			Cpr66D	0	0	0	0	0	0	0			lncRNA:CR44641	0	0	0	0	0	0	0			CG31380	0	0	0	0	0	0	0			lncRNA:CR45627	0	0	0	0	0	0
			lncRNA:CR44695	0	0	0	0	0	0	0			Mst77Y-7	0	0	0	0	0	0	0			lncRNA:CR44612	0	0	0	0	0	0	0			lncRNA:CR44084	0	0	0	0	0	0	0			lncRNA:CR45628	0	0	0	0	0	0
			snRNA:U4atac	0	0	0	0	0	0	0			asRNA:CR45834	0	0	0	0	0	0	0			lncRNA:CR44593	0	0	0	0	0	0	0			CG31266	0	0	0	0	0	0	0			asRNA:CR46264	0	0	0	0	0	0
			lncRNA:CR43314	0	0	0	0	0	0	0			PRY	0	0	0	0	0	0	0			lncRNA:CR44586	0	0	0	0	0	0	0			tRNA:Asp-GTC-1-12	0	0	0	0	0	0	0			lncRNA:CR46221	0	0	0	0	0	0
			lncRNA:CR43302	0	0	0	0	0	0	0			lncRNA:CR45833	0	0	0	0	0	0	0			lncRNA:CR44740	0	0	0	0	0	0	0			lncRNA:CR43989	0.22563	0.541968	2.05833	0.182144	0.527359	0	0.113559			lncRNA:CR45624	0	0	0	0	0	0
			lncRNA:CR44688	0	0	0	0	0	0	0			CG31867	0	0	0	0	0	0	0			lncRNA:CR44756	0	0	0	0	0	0	0			asRNA:CR45995	0	0	0	0	0	0	0			lncRNA:CR45630	0	0	0	0	0	0
			lncRNA:CR43260	0	0	0	0	0	0	0			Naa20B	0	0	0	0	0	0	0			lncRNA:CR44591	0	0	0	0	0	0	0			tRNA:Leu-TAG-1-1	0	0	0	0	0	0	0			lncRNA:CR45609	0	0	0	0	0	0
			lncRNA:CR43990	0.0180685	0.103271	0.441726	0.0292238	0.101944	0	0.0100553			CR31700	0	0	0	0	0	0	0			lncRNA:CR44755	0	0	0	0	0	0	0			CG3036	7.23919	2.22256	1.1141	1.38795	0.0501359	0.0466297	3.57717			lncRNA:CR46391	0	0	0	0	0	0
			asRNA:CR43463	0.00857171	0.00192749	0.220863	0.000545443	0.0620648	0	5.84922e-06			Mst77Y-4	0	0	0	0	0	0	0			lncRNA:CR44745	0	0	0	0	0	0	0			Rift	1.83848	0.328762	0.844325	0.281206	0.464287	0	0.121662			lncRNA:CR45637	0	0	0	0	0	0
			lncRNA:CR43234	0	0	0	0	0	0	0			CG31848	0	0	0	0	0	0	0			lncRNA:CR44584	0	0	0	0	0	0	0			lncRNA:CR31386	0	0	0	0	0	0	0			lncRNA:CR45633	0	0	0	0	0	0
			lncRNA:CR44621	0	0	0	0	0	0	0			Mst77Y-13	0	0	0	0	0	0	0			lncRNA:CR44633	0	0	0	0	0	0	0			kto	0.260179	0.822492	1.71215	0.32246	0.41912	0	0.164914			lncRNA:CR45635	0	0	0	0	0	0
			tyn	0.985906	0.651286	1.44773	0.437009	0.368176	0.0624704	0.293727			CG31709	0	0	0	0	0	0	0			osp	2.48902	0.552094	1.00916	0.54399	0.45827	0.614342	0.259936			lncRNA:CR45961	0	0	0	0	0	0	0			lncRNA:CR45636	0	0	0	0	0	0
			CG43331	0.00612242	0.0843937	0.220863	0.0238818	0.0438988	0	0.0129483			asRNA:CR45832	0	0	0	0	0	0	0			lncRNA:CR44588	0	0	0	0	0	0	0			CG42824	0	0	0	0	0	0	0			lncRNA:CR46219	0	0	0	0	0	0
			Nuak	14.3736	0.267436	0.520104	0.648022	0.53101	0.658478	0.221342			CG31861	0.0487229	0.234081	1.04166	0.076989	0.2412	0.0624961	0.0427556			lncRNA:CR44610	0	0	0	0	0	0	0			CG31371	0	0	0	0	0	0	0			lncRNA:CR46267	0	0	0	0	0	0
			lncRNA:CR44627	0	0	0	0	0	0	0			modSP	0.0117174	0.032833	0.21933	0.00935606	0.0550627	0	0.00180655			lncRNA:CR44613	0	0	0	0	0	0	0			CG42832	0	0	0	0	0	0	0			asRNA:CR46266	0	0	0	0	0	0
			lncRNA:CR44685	0	0	0	0	0	0	0			CG31870	0	0	0	0	0	0	0			lncRNA:CR44594	0	0	0	0	0	0	0			snoRNA:U3:54Ab	0	0	0	0	0	0	0			asRNA:CR46269	0	0	0	0	0	0
			lncRNA:CR44614	0	0	0	0	0	0	0			asRNA:CR45885	0	0	0	0	0	0	0			lncRNA:CR44649	0	0	0	0	0	0	0			Qsox4	0	0	0	0	0	0	0			lncRNA:CR46351	0	0	0	0	0	0
			lncRNA:CR44629	0	0	0	0	0	0	0			CG31862	0	0	0	0	0	0	0			lncRNA:CR44651	0	0	0	0	0	0	0			CG42831	0	0	0	0	0	0	0			Mekk1	2.12106	0.758061	1.53917	0.640459	0.477036	0.058419
			asRNA:CR43257	0	0	0	0	0	0	0			CG31871	0	0	0	0	0	0	0			lncRNA:CR44680	0	0	0	0	0	0	0			CG42834	0	0	0	0	0	0	0			lncRNA:CR45631	0	0	0	0	0	0
			lncRNA:CR44687	0	0	0	0	0	0	0			CG31872	0	0	0	0	0	0	0			lncRNA:CR44590	0	0	0	0	0	0	0			asRNA:CR44169	0	0	0	0	0	0	0			Ptp69D	4.13869	0.686869	1.06163	0.889906	0.437207	0.128042
			lncRNA:CR44611	0	0	0	0	0	0	0			lncRNA:CR44450	0.00594568	0.0251502	0.220863	0.00711702	0.0568337	0.0624989	0.00103805			lncRNA:CR44747	0	0	0	0	0	0	0			CG42833	0	0	0	0	0	0	0			lncRNA:CR46352	0	0	0	0	0	0
			CG44623	0	0	0	0	0	0	0			CG32040	0	0	0	0	0	0	0			lncRNA:CR44678	0	0	0	0	0	0	0			CG42820	0	0	0	0	0	0	0			lncRNA:CR46350	0	0	0	0	0	0
			lncRNA:CR44626	0	0	0	0	0	0	0			CG44040	0.00371511	-0.00925312	0.220863	-0.00261845	0.0604114	0	-0.000136587			lncRNA:CR44744	0	0	0	0	0	0	0			Kaz1-ORFA	0	0	0	0	0	0	0			CG34133	2.55336	0.897978	1.37869	0.842344	0.447725	0.065182
			CG43318	0.00747338	0.0849564	0.220863	0.024041	0.0437808	0	0.013134			CR45779	0	0	0	0	0	0	0			lncRNA:CR44639	0	0	0	0	0	0	0			CG42835	0	0	0	0	0	0	0			lncRNA:CR45608	0	0	0	0	0	0
			CG44625	0	0	0	0	0	0	0			CG34375	0.0352514	0.144588	0.375524	0.0567922	0.0843319	0.0624961	0.0538492			lncRNA:CR44677	0	0	0	0	0	0	0			Pxt	0	0	0	0	0	0	0			lncRNA:CR45606	0	0	0	0	0	0
			lncRNA:CR44686	0	0	0	0	0	0	0			lncRNA:CR45901	0	0	0	0	0	0	0			lncRNA:CR44650	0	0	0	0	0	0	0			lncRNA:CR45138	0	0	0	0	0	0	0			Nna1	3.52243	0.796379	1.12269	0.77604	0.424338	0.119888
			CG44624	0	0	0	0	0	0	0			lncRNA:CR44074	0.0117953	-0.0116942	0.220609	-0.00331304	0.0598578	0	-0.000219373			lncRNA:CR44635	0	0	0	0	0	0	0			Hsp70Bbb	0	0	0	0	0	0	0			lncRNA:CR45580	0	0	0	0	0	0
			CG44622	0	0	0	0	0	0	0			lncRNA:CR44186	0.0185718	-0.0822103	0.475893	-0.0239164	0.0999253	0.0624689	-0.018014			lncRNA:CR44757	0	0	0	0	0	0	0			CG42819	0	0	0	0	0	0	0			lncRNA:CR45581	0	0	0	0	0	0
			lncRNA:CR43262	0	0	0	0	0	0	0			lncRNA:CR44220	0.00728343	-0.0256364	0.220863	-0.00725459	0.0567246	0	-0.0010795			lncRNA:CR44644	0	0	0	0	0	0	0			CG42823	0	0	0	0	0	0	0			AdamTS-A	0	0	0	0	0	0
			tei	30.1603	0.317266	0.750887	0.818907	0.442804	0.55621	0.379202			asRNA:CR45778	0	0	0	0	0	0	0			lncRNA:CR44638	0	0	0	0	0	0	0			CG42825	0	0	0	0	0	0	0			l(3)mbt	2.96099	0.768422	1.3163	0.777031	0.432828	0.0756183
			CG43249	0	0	0	0	0	0	0			Tob	23.8837	0.111731	0.369923	0.498508	0.534685	0.964252	0.0529403			lncRNA:CR44642	0	0	0	0	0	0	0			lncRNA:CR45963	0	0	0	0	0	0	0			lncRNA:CR45911	0.652721	0.883416	2.33884	0.446445	0.638145	0.0450859
			lncRNA:CR43258	0	0	0	0	0	0	0			lncRNA:CR44219	0.00497099	-0.0620769	0.220863	-0.0175665	0.0486663	0	-0.00674476			lncRNA:CR44707	0	0	0	0	0	0	0			CG42822	0	0	0	0	0	0	0			asRNA:CR46354	0	0	0	0	0	0
			lncRNA:CR43250	0	0	0	0	0	0	0			CG32054	0	0	0	0	0	0	0			lncRNA:CR44743	0	0	0	0	0	0	0			CG44174	0	0	0	0	0	0	0			lncRNA:CR46393	0	0	0	0	0	0
			CR43381	0	0	0	0	0	0	0			lncRNA:flam	0.00746329	0.0162869	0.220863	0.00460887	0.058826	0	0.000428521			lncRNA:CR44674	0	0	0	0	0	0	0			lncRNA:CR44170	0	0	0	0	0	0	0			sisRNA:3	0	0	0	0	0	0
			lncRNA:CR43253	0	0	0	0	0	0	0			asRNA:CR31912	0	0	0	0	0	0	0			lncRNA:CR44742	0	0	0	0	0	0	0			asRNA:CR45968	0	0	0	0	0	0	0			Gyc76C	0.0661894	0.382067	1.57546	0.11066	0.366235	0
			lncRNA:CR43870	0.0102471	0.12701	0.220863	0.0359414	0.035328	0	0.0314681			CG31198	0	0	0	0	0	0	0			lncRNA:CR44741	0	0	0	0	0	0	0			CG42818	0	0	0	0	0	0	0			lncRNA:CR46218	0	0	0	0	0	0
			CG43897	0.0105369	0.0849565	0.212475	0.0249902	0.0430795	0	0.0137298			asRNA:CR46020	0	0	0	0	0	0	0			lncRNA:CR44544	0	0	0	0	0	0	0			lncRNA:CR45966	0	0	0	0	0	0	0			lncRNA:CR45583	0	0	0	0	0	0
			lncRNA:CR43247	0	0	0	0	0	0	0			CG31949	0	0	0	0	0	0	0			lncRNA:CR44758	0	0	0	0	0	0	0			CG42821	0	0	0	0	0	0	0			sisRNA:CR46360	0	0	0	0	0	0
			lncRNA:CR44607	0	0	0	0	0	0	0			lncRNA:CR45898	0	0	0	0	0	0	0			lncRNA:CR44611	0	0	0	0	0	0	0			lncRNA:CR45967	0	0	0	0	0	0	0			CG46394	0	0	0	0	0	0
			lncRNA:CR43252	0	0	0	0	0	0	0			lncRNA:CR31386	0.04606	0.0172437	0.366778	-0.0155906	0.0713857	0.124978	-0.00837102			lncRNA:CR44648	0	0	0	0	0	0	0			CG31404	0	0	0	0	0	0	0			CG31600	0	0	0	0	0	0
			CG43362	0	0	0	0	0	0	0			CG42780	0.0035744	-0.0256364	0.220863	-0.00725459	0.0567246	0	-0.0010795			lncRNA:CR44645	0	0	0	0	0	0	0			lncRNA:CR45957	0	0	0	0	0	0	0			CG46387	0	0	0	0	0	0
			CR43380	0	0	0	0	0	0	0			CG31948	0	0	0	0	0	0	0			lncRNA:CR44733	0	0	0	0	0	0	0			lncRNA:CR44175	0	0	0	0	0	0	0			ich	0	0	0	0	0	0
			CR43364	0	0	0	0	0	0	0			Npc2e	0.0281944	-0.00380141	0.388935	-0.00245279	0.110359	0	-0.0006387			lncRNA:CR44609	0	0	0	0	0	0	0			CG42830	0	0	0	0	0	0	0			lncRNA:CR46348	0	0	0	0	0	0
			CR43379	0	0	0	0	0	0	0			CG31199	0	0	0	0	0	0	0			lncRNA:CR44699	0	0	0	0	0	0	0			CG31406	0	0	0	0	0	0	0			shps	0	0	0	0	0	0
			CG43233	0	0	0	0	0	0	0			CG42763	0.00497099	-0.0620769	0.220863	-0.0175665	0.0486663	0	-0.00674476			lncRNA:CR44583	0	0	0	0	0	0	0			lncRNA:CR44171	0	0	0	0	0	0	0			FBgn0286778-1	0	0	0	0	0	0
			Su(Tpl)	18.4111	0.287868	0.440649	0.632097	0.504918	0.840351	0.220049			tRNA:Arg-TCT-3-1	0	0	0	0	0	0	0			lncRNA:CR44759	0	0	0	0	0	0	0			asRNA:CR44176	0	0	0	0	0	0	0			stol	78.8238	0.170574	0.234594	0.777622	0.368715	0.657965
			CG45061	0	0	0	0	0	0	0			CG31952	0	0	0	0	0	0	0			elB	8.41646	0.268508	0.666512	0.598361	0.479765	0.889838	0.329756			CG42828	0	0	0	0	0	0	0			hll	0	0	0	0	0	0
			CG45062	0	0	0	0	0	0	0			mtd	37.5141	0.0990582	0.353692	0.483266	0.39461	0.919088	0.0399264			lncRNA:CR44636	0	0	0	0	0	0	0			CG42816	0	0	0	0	0	0	0			CG34384	11.3965	0.57652	0.693783	0.897339	0.351827	0.283813
			CG43315	0	0	0	0	0	0	0			cue	1.9053	0.368237	1.41928	0.281196	0.544951	0.499247	0.124055			lncRNA:CR44700	0	0	0	0	0	0	0			lncRNA:CR45956	0	0	0	0	0	0	0			sisRNA:CR46364	0	0	0	0	0	0
			lncRNA:CR45109	0	0	0	0	0	0	0			CG42857	0.0153421	-0.0667478	0.440849	-0.0188514	0.0959087	0.0624961	-0.0166446			lncRNA:CR44732	0	0	0	0	0	0	0			CG42826	0	0	0	0	0	0	0			CG46385	0	0	0	0	0	0
			CG1090	16.491	0.381174	0.782418	0.679053	0.495014	0.59099	0.452091			CG31677	0	0	0	0	0	0	0			lncRNA:CR44647	0	0	0	0	0	0	0			lncRNA:CR45958	0	0	0	0	0	0	0			smash	6.31055	0.367467	0.744203	0.580247	0.46218	0.292408
			lncRNA:CR44694	0	0	0	0	0	0	0			lncRNA:CR45823	0	0	0	0	0	0	0			lncRNA:CR44545	0	0	0	0	0	0	0			CG31407	0	0	0	0	0	0	0			ND-MNLL	1.40907	0.872827	1.66435	0.613642	0.52679	0.0450859
			lncRNA:CR44670	0	0	0	0	0	0	0			Mst36Fb	0.0216489	0.0742945	0.651623	0.0218873	0.166048	0.0624989	0.00717544			lncRNA:CR44705	0	0	0	0	0	0	0			CG42827	0	0	0	0	0	0	0			lncRNA:CR45584	0	0	0	0	0	0
			lncRNA:CR44668	0	0	0	0	0	0	0			CG32683	4.46646	0.415975	1.22018	0.676178	0.366854	0.587968	0.474912			lncRNA:CR44654	0	0	0	0	0	0	0			Npc2e	0	0	0	0	0	0	0			scb	0	0	0	0	0	0
			CG45101	0	0	0	0	0	0	0			lncRNA:CR45899	0	0	0	0	0	0	0			lncRNA:CR44634	0	0	0	0	0	0	0			lncRNA:CR44180	0	0	0	0	0	0	0			lncRNA:CR45591	0	0	0	0	0	0
			lncRNA:CR44665	0	0	0	0	0	0	0			tRNA:Asp-GTC-2-1	0	0	0	0	0	0	0			lncRNA:CR44643	0	0	0	0	0	0	0			asRNA:CR44181	0	0	0	0	0	0	0			Cyp6a21	0	0	0	0	0	0
			CG45100	0	0	0	0	0	0	0			Tengl3	0	0	0	0	0	0	0			lncRNA:CR44730	0	0	0	0	0	0	0			lncRNA:CR45959	0	0	0	0	0	0	0			lncRNA:CR45592	0	0	0	0	0	0
			lncRNA:CR44667	0	0	0	0	0	0	0			CG31693	0	0	0	0	0	0	0			lncRNA:CR44547	0	0	0	0	0	0	0			lncRNA:CR44081	0	0	0	0	0	0	0			CG46395	0	0	0	0	0	0
			lncRNA:CR44682	0	0	0	0	0	0	0			eEF2	31.9631	0.137924	0.335211	0.504845	0.508635	0.952041	0.0459928			lncRNA:CR44604	0	0	0	0	0	0	0			CG43094	0	0	0	0	0	0	0			lncRNA:CR45585	0	0	0	0	0	0
			lncRNA:CR44669	0	0	0	0	0	0	0			asRNA:CR45886	0	0	0	0	0	0	0			lncRNA:CR44676	0	0	0	0	0	0	0			CG43093	0	0	0	0	0	0	0			BaraA2	0	0	0	0	0	0
			asRNA:CR45479	0.100167	0.523607	0.909633	0.184787	0.174273	0	0.140301			asRNA:CR45807	0	0	0	0	0	0	0			lncRNA:CR44607	0	0	0	0	0	0	0			CR44079	0	0	0	0	0	0	0			asRNA:CR45648	0.00559088	0.0243116	0.160628	0.0068797	0.0399862	0
			His3.3B	18.7755	0.226144	0.404641	0.775351	0.478149	0.669974	0.350174			CR31953	0	0	0	0	0	0	0			lncRNA:CR44671	0	0	0	0	0	0	0			CG42807	0	0	0	0	0	0	0			lncRNA:CR45586	0	0	0	0	0	0
			CG43248	0	0	0	0	0	0	0			CG42565	0	0	0	0	0	0	0			lncRNA:CR44542	0	0	0	0	0	0	0			asRNA:CR45969	0	0	0	0	0	0	0			lncRNA:CR45587	0	0	0	0	0	0
			CG43371	0	0	0	0	0	0	0			CG1943	6.64998	0.272434	0.742736	0.34249	0.587394	0.686466	0.126545			lncRNA:CR44646	0	0	0	0	0	0	0			lncRNA:CR44078	0	0	0	0	0	0	0			lncRNA:CR45588	0	0	0	0	0	0
			CG44666	0	0	0	0	0	0	0			qvr	39.0538	-0.26243	0.37387	0.414645	0.408042	0.811423	-0.470784			lncRNA:CR44546	0	0	0	0	0	0	0			CG42809	0	0	0	0	0	0	0			Pkcdelta	0	0	0	0	0	0
			lncRNA:CR44681	0	0	0	0	0	0	0			Cog8	0.825	0.579074	2.15586	0.298121	0.705634	0.436766	0.277596			lncRNA:CR44658	0	0	0	0	0	0	0			lncRNA:CR44080	0	0	0	0	0	0	0			lncRNA:CR45594	0	0	0	0	0	0
			lncRNA:CR44832	0.794542	1.17189	2.00706	0.63179	0.484674	0.123727	1.01026			CG6937	0.735217	0.52052	2.3401	0.192179	0.736736	0.436766	0.112053			lncRNA:CR44548	0	0	0	0	0	0	0			lncRNA:CR42836	0	0	0	0	0	0	0			lncRNA:CR45589	0	0	0	0	0	0
			CG43246	0	0	0	0	0	0	0			Prosalpha5	4.88594	0.240789	0.76868	0.327624	0.613083	0.561622	0.0590786			lncRNA:CR44833	0	0	0	0	0	0	0			CG31358	0	0	0	0	0	0	0			lncRNA:CR45599	0	0	0	0	0	0
			Diedel2	0	0	0	0	0	0	0			CG42579	0.00676043	0.0162869	0.220863	0.00460887	0.058826	0	0.000428521			lncRNA:CR44496	0	0	0	0	0	0	0			CR43096	0	0	0	0	0	0	0			lncRNA:CR44544	0.0145311	0.110019	0.301213	0.0339233	0.0646349	0
			lncRNA:CR44664	0	0	0	0	0	0	0			CG31231	0.00676043	0.0162869	0.220863	0.00460887	0.058826	0	0.000428521			lncRNA:CR45295	0	0	0	0	0	0	0			CG31253	0	0	0	0	0	0	0			lncRNA:CR45596	0	0	0	0	0	0
			lncRNA:CR44633	0	0	0	0	0	0	0			CG2519	1.72064	0.43729	1.71588	0.22821	0.647387	0.499247	0.139952			lncRNA:CR44582	0	0	0	0	0	0	0			CG31391	0	0	0	0	0	0	0			lncRNA:CR45598	0	0	0	0	0	0
			lncRNA:CR44661	0	0	0	0	0	0	0			CG44303	0.543567	1.60713	2.20593	0.882967	0.354659	0.374297	1.67005			lncRNA:CR44499	0	0	0	0	0	0	0			lncRNA:CR44077	0	0	0	0	0	0	0			lncRNA:CR45673	0	0	0	0	0	0
			lncRNA:CR44660	0	0	0	0	0	0	0			lncRNA:CR44444	0	0	0	0	0	0	0			lncRNA:CR44672	0	0	0	0	0	0	0			lncRNA:CR45964	0	0	0	0	0	0	0			asRNA:CR45969	0.0308851	0.168397	0.63787	0.0479922	0.143988	0
			asRNA:CR45108	0	0	0	0	0	0	0			CG31624	0.00676043	0.0162869	0.220863	0.00460887	0.058826	0	0.000428521			lncRNA:CR44669	0	0	0	0	0	0	0			CG31259	0	0	0	0	0	0	0			lncRNA:CR45418	0.941177	0.611874	1.66918	0.362485	0.479607	0
			CG43255	0	0	0	0	0	0	0			CG31139	0.00314782	0.0054276	0.220538	0.00153817	0.0612728	0.0624961	4.67425e-05			lncRNA:CR44549	0	0	0	0	0	0	0			tRNA:Thr-CGT-1-2	0	0	0	0	0	0	0			CG46448	0	0	0	0	0	0
			lncRNA:CR44631	0	0	0	0	0	0	0			CG6179	1.5441	0.425942	1.69681	0.24148	0.737868	0.499247	0.142921			lncRNA:CR44553	0	0	0	0	0	0	0			CG31262	0	0	0	0	0	0	0			smg	4.84709	0.563913	0.841429	0.84759	0.376975	0.161647
			CG43254	0	0	0	0	0	0	0			DnaJ-60	0	0	0	0	0	0	0			lncRNA:CR44668	0	0	0	0	0	0	0			CG43092	0	0	0	0	0	0	0			asRNA:CR45601	0	0	0	0	0	0
			CG43267	0	0	0	0	0	0	0			lncRNA:CR45809	0	0	0	0	0	0	0			lncRNA:CR44536	0	0	0	0	0	0	0			pre-mod(mdg4)-O	0	0	0	0	0	0	0			lncRNA:CR45457	0.0105394	0.0959166	0.321256	0.0271425	0.0695936	0
			lncRNA:CR45082	0	0	0	0	0	0	0			CG42568	0	0	0	0	0	0	0			CR44659	0	0	0	0	0	0	0			lncRNA:CR46000	0	0	0	0	0	0	0			lncRNA:CR45695	0	0	0	0	0	0
			tRNA:Thr-TGT-2-4	0	0	0	0	0	0	0			lncRNA:CR44157	0.00439142	-0.0361406	0.220863	-0.0102271	0.0543762	0	-0.00218545			lncRNA:CR44529	0	0	0	0	0	0	0			tRNA:Thr-TGT-1-1	0	0	0	0	0	0	0			lncRNA:CR45579	0	0	0	0	0	0
			CG43231	0	0	0	0	0	0	0			CG14669	2.55391	0.200058	1.32357	0.442677	0.519693	0.499247	0.149243			lncRNA:CR44857	0	0	0	0	0	0	0			lncRNA:CR45983	0	0	0	0	0	0	0			CR46425	0	0	0	0	0	0
			CR43359	0	0	0	0	0	0	0			asRNA:CR42860	0.00276926	-0.0620769	0.220863	-0.0175665	0.0486663	0	-0.00674476			lncRNA:CR44554	0	0	0	0	0	0	0			lncRNA:CR45977	0	0	0	0	0	0	0			lncRNA:CR45678	0	0	0	0	0	0
			CG43861	0.578479	0.961892	1.94873	0.504595	0.449744	0.124414	0.504287			lncRNA:CR44151	0.00932943	-0.0822326	0.220863	-0.0232702	0.0443532	0.0624961	-0.0122489			lncRNA:CR44539	0	0	0	0	0	0	0			lncRNA:CR45973	0	0	0	0	0	0	0			lncRNA:CR45697	0	0	0	0	0	0
			tRNA:Thr-TGT-2-3	0	0	0	0	0	0	0			asRNA:CR45802	0	0	0	0	0	0	0			lncRNA:CR44581	0	0	0	0	0	0	0			asRNA:CR45999	0	0	0	0	0	0	0			lncRNA:CR45607	0	0	0	0	0	0
			lncRNA:CR43899	0.0220783	0.0819269	0.219972	0.0232777	0.0443477	0	0.0122079			CR31958	0	0	0	0	0	0	0			lncRNA:CR44670	0	0	0	0	0	0	0			CG31337	0	0	0	0	0	0	0			lncRNA:CR45677	0	0	0	0	0	0
			CG45066	0.00645807	0.0835654	0.220863	0.0236474	0.0440728	0	0.0126777			MtnE	0.04896	-0.0219037	0.568077	-0.0313558	0.125192	0.0624961	-0.0424656			lncRNA:CR44527	0	0	0	0	0	0	0			CG31343	0	0	0	0	0	0	0			snoRNA:Psi28S-1153	0.417689	1.05538	2.34459	0.472371	0.524321	0.0450859
			lncRNA:CR44697	0	0	0	0	0	0	0			lncRNA:CR44208	0.00700126	-0.0822326	0.220863	-0.0232702	0.0443532	0.0624961	-0.0122489			lncRNA:CR44550	0	0	0	0	0	0	0			lncRNA:CR45998	0	0	0	0	0	0	0			salm	5.70926	0.893426	1.17	0.767824	0.346426	0.242982
			CG45060	0	0	0	0	0	0	0			lncRNA:CR45803	0	0	0	0	0	0	0			lncRNA:CR44497	0	0	0	0	0	0	0			CG31373	0	0	0	0	0	0	0			lncRNA:CR45698	0	0	0	0	0	0
			lncRNA:CR44913	0.0476115	0.290036	1.38065	0.0766845	0.31254	0.124414	0.0373653			CG31262	0.191785	0.10157	0.1869	0.0256461	0.062619	0.0624261	0.0488263			lncRNA:CR44580	0	0	0	0	0	0	0			Tpl94D	0	0	0	0	0	0	0			lncRNA:CR45605	0	0	0	0	0	0
			lncRNA:CR44610	0	0	0	0	0	0	0			lncRNA:TS18	0	0	0	0	0	0	0			lncRNA:CR44528	0	0	0	0	0	0	0			lncRNA:CR45972	0	0	0	0	0	0	0			lncRNA:CR45680	0	0	0	0	0	0
			lncRNA:CR44693	0	0	0	0	0	0	0			CG31960	0	0	0	0	0	0	0			lncRNA:CR44660	0	0	0	0	0	0	0			asRNA:CR45974	0	0	0	0	0	0	0			lncRNA:CR45696	0	0	0	0	0	0
			lncRNA:CR44609	0	0	0	0	0	0	0			asRNA:CR45801	0	0	0	0	0	0	0			lncRNA:CR44495	0	0	0	0	0	0	0			lncRNA:CR45997	0	0	0	0	0	0	0			lncRNA:CR45675	0	0	0	0	0	0
			lncRNA:CR44931	0.00867429	0.0849564	0.220863	0.024041	0.0437808	0	0.013134			WDY	0	0	0	0	0	0	0			lncRNA:CR44858	0	0	0	0	0	0	0			lncRNA:CR45975	0	0	0	0	0	0	0			asRNA:CR45682	0	0	0	0	0	0
			lncRNA:CR44548	0	0	0	0	0	0	0			CG3558	1.91624	0.359288	1.43523	0.23764	0.740505	0.561622	0.11658			lncRNA:CR44555	0	0	0	0	0	0	0			salm	0.27872	0.120047	0.570064	0.0701953	0.277737	0	0.00951319			lncRNA:CR45688	0	0	0	0	0	0
			Aven	1.71811	0.479029	1.66534	0.405424	0.637019	0.185671	0.247779			lncRNA:CR44448	0	0	0	0	0	0	0			lncRNA:CR44661	0	0	0	0	0	0	0			CG31347	0	0	0	0	0	0	0			CR46417	0	0	0	0	0	0
			jeb	127.358	0.680576	0.648073	1.2807	0.251662	0.487063	0.563445			lncRNA:CR46021	0.00610112	0.0122235	0.220387	0.00346647	0.0597356	0.0624961	0.000240154			asRNA:CR44704	0	0	0	0	0	0	0			lncRNA:CR45971	0	0	0	0	0	0	0			lncRNA:CR45692	0	0	0	0	0	0
			lncRNA:CR43372	0	0	0	0	0	0	0			asRNA:CR45798	0	0	0	0	0	0	0			CG44666	0	0	0	0	0	0	0			lncRNA:CR45965	0	0	0	0	0	0	0			lncRNA:CR45681	0	0	0	0	0	0
			scaRNA:MeU1b-A234	0	0	0	0	0	0	0			Vha36-1	36.8113	0.150681	0.310103	0.507185	0.616567	0.969877	0.112491			lncRNA:CR44526	0	0	0	0	0	0	0			asRNA:CR45970	0	0	0	0	0	0	0			lncRNA:CR45672	0	0	0	0	0	0
			asRNA:CR44907	0.0105369	0.0849565	0.212475	0.0249902	0.0430795	0	0.0137298			asRNA:CR45912	0.00610112	0.0122235	0.220387	0.00346647	0.0597356	0.0624961	0.000240154			lncRNA:CR44667	0	0	0	0	0	0	0			lncRNA:CR44075	0	0	0	0	0	0	0			lncRNA:CR45685	0	0	0	0	0	0
			lncRNA:CR43940	0.00453979	0.0437452	0.220834	0.0123807	0.0526858	0	0.00324529			CG46042	0	0	0	0	0	0	0			lncRNA:CR44530	0	0	0	0	0	0	0			CG43091	0	0	0	0	0	0	0			CG45691	0	0	0	0	0	0
			sncRNA:CR43603	0.0219477	0.124641	0.389509	0.0463299	0.0905325	0	0.0432559			lncRNA:CR46040	0	0	0	0	0	0	0			lncRNA:CR44665	0	0	0	0	0	0	0			sro	0	0	0	0	0	0	0			CG11970	0.37816	1.12211	2.74015	0.434305	0.628149	0.0450859
			CG43392	0	0	0	0	0	0	0			lncRNA:CR44066	0.00439142	-0.0361406	0.220863	-0.0102271	0.0543762	0	-0.00218545			lncRNA:CR44822	0	0	0	0	0	0	0			CG42812	0	0	0	0	0	0	0			lncRNA:CR45689	0	0	0	0	0	0
			lncRNA:CR44392	0.0469066	0.163763	0.794986	0.058213	0.196348	0	0.0308396			CG31157	0	0	0	0	0	0	0			lncRNA:CR44534	0	0	0	0	0	0	0			lncRNA:CR44157	0	0	0	0	0	0	0			pho	25.9303	0.336669	0.355821	1.11269	0.36912	0.556164
			Ac78C	3.0154	0.553927	1.18079	0.603178	0.390675	0.124414	0.422898			IBIN	0.00522769	0.0162869	0.220863	0.00460887	0.058826	0	0.000428521			CG8461	1.27835	0.945687	1.61457	0.509763	0.592553	0.614457	0.598435			lncRNA:CR44151	0	0	0	0	0	0	0			ccb	0	0	0	0	0	0
			CG43393	0	0	0	0	0	0	0			lncRNA:CR44056	0.00534812	-0.0270559	0.220863	-0.00765629	0.0564064	0	-0.00120538			lncRNA:CR44579	0	0	0	0	0	0	0			CG42814	0	0	0	0	0	0	0			CG17321	15.5737	0.239694	0.455392	0.606044	0.56463	0.619451
			CG43391	0	0	0	0	0	0	0			CG31933	0	0	0	0	0	0	0			CG44532	0	0	0	0	0	0	0			CG42810	0	0	0	0	0	0	0			CG45690	0	0	0	0	0	0
			CR43377	0	0	0	0	0	0	0			CG31926	0	0	0	0	0	0	0			lncRNA:CR44576	0	0	0	0	0	0	0			CG42811	0	0	0	0	0	0	0			asRNA:CR45686	0	0	0	0	0	0
			pxb	1.80089	0.308533	1.24614	0.401633	0.491865	0.123727	0.160121			CG31924	0	0	0	0	0	0	0			lncRNA:CR44535	0	0	0	0	0	0	0			ppk18	0	0	0	0	0	0	0			dbf	0	0	0	0	0	0
			lncRNA:CR44450	0.0726563	0.0595034	0.664928	0.0252608	0.226038	0	0.0052183			lncRNA:CR46009	0.00314782	0.0054276	0.220538	0.00153817	0.0612728	0.0624961	4.67425e-05			lncRNA:CR45444	0.0298697	0.126826	0.582564	0.0330027	0.127743	0.0768848	0.0109868			lncRNA:CR44145	0	0	0	0	0	0	0			lncRNA:CR45669	0.608306	0.737682	1.52698	0.430957	0.388881	0
			CR43378	0	0	0	0	0	0	0			tRNA:Gln-CTG-2-2	0	0	0	0	0	0	0			CG14104	0.93318	0.608147	1.94079	0.363294	0.550943	0.537558	0.29868			asRNA:CR44062	0	0	0	0	0	0	0			hpRNA:CR46342	0	0	0	0	0	0
			CG43389	0	0	0	0	0	0	0			lncRNA:CR46031	0	0	0	0	0	0	0			lncRNA:CR44570	0	0	0	0	0	0	0			lncRNA:CR44148	0	0	0	0	0	0	0			lncRNA:CR45671	0	0	0	0	0	0
			CG43390	0	0	0	0	0	0	0			CG31928	0	0	0	0	0	0	0			lncRNA:CR44664	0	0	0	0	0	0	0			CG44153	0	0	0	0	0	0	0			CG13751	12.5456	0.242634	0.543307	0.633179	0.52066	0.459945
			Lrp4	18.3959	0.199933	0.554071	0.640845	0.529915	0.553031	0.183379			asRNA:CR45818	0	0	0	0	0	0	0			lncRNA:CR44578	0	0	0	0	0	0	0			asRNA:CR44147	0	0	0	0	0	0	0			l(2)k05911	0	0	0	0	0	0
			lncRNA:CR43830	0.00994886	0.0706622	0.220863	0.019996	0.0468135	0	0.00886872			CR46027	0	0	0	0	0	0	0			lncRNA:CR44531	0	0	0	0	0	0	0			Ldsdh1	5.65531	0.546067	0.654278	0.687554	0.221067	0.134054	0.260275			lncRNA:CR45642	0	0	0	0	0	0
			CG9636	9.28072	0.222631	0.687165	0.492019	0.513358	0.41422	0.0882257			asRNA:CR46034	0	0	0	0	0	0	0			lncRNA:CR44573	0	0	0	0	0	0	0			Ir47b	0	0	0	0	0	0	0			lncRNA:CR46349	0	0	0	0	0	0
			asRNA:CR43468	0.0159795	0.0494214	0.440986	0.013952	0.0985092	0	0.0108988			asRNA:CR45812	0	0	0	0	0	0	0			lncRNA:CR44572	0	0	0	0	0	0	0			lncRNA:CR44166	0	0	0	0	0	0	0			lncRNA:CR45650	0	0	0	0	0	0
			lncRNA:CR43849	0.122874	0.476265	1.74855	0.156418	0.438888	0.0612565	0.0853752			tRNA:Ser-GCT-2-3	0	0	0	0	0	0	0			lncRNA:CR44577	0	0	0	0	0	0	0			CG42841	0	0	0	0	0	0	0			ds	0	0	0	0	0	0
			dar1	0	0	0	0	0	0	0			tRNA:Arg-TCT-2-1	0	0	0	0	0	0	0			asRNA:CR44911	0	0	0	0	0	0	0			lncRNA:CR44209	0	0	0	0	0	0	0			CG17931	5.77781	0.555651	0.77442	0.802512	0.43425	0.144267
			mt:CoIII	356.152	0.114407	0.153801	0.924889	0.296906	0.649824	0.185023			CG31910	0	0	0	0	0	0	0			lncRNA:CR44571	0	0	0	0	0	0	0			Gr22c	0	0	0	0	0	0	0			lncRNA:CR46414	0	0	0	0	0	0
			nkd	11.9786	0.462584	0.956025	0.832334	0.381878	0.412059	0.353614			tRNA:Gln-CTG-2-3	0	0	0	0	0	0	0			lncRNA:CR44575	0	0	0	0	0	0	0			f	0	0	0	0	0	0	0			Asx	2.11621	0.698016	1.3597	0.651227	0.487083	0.0450859
			asRNA:CR44981	0	0	0	0	0	0	0			tRNA:Ser-GCT-2-4	0	0	0	0	0	0	0			CG44574	0	0	0	0	0	0	0			CG43610	0.236315	0.345345	0.519756	0.221479	0.168803	0	0.102049			CG46399	0	0	0	0	0	0
			Trp1	29.2321	0.205855	0.381009	0.679702	0.55802	0.784366	0.196322			lncRNA:CR46041	0	0	0	0	0	0	0			lncRNA:CR44563	0	0	0	0	0	0	0			Gr2a	0	0	0	0	0	0	0			lncRNA:CR45649	0	0	0	0	0	0
			beat-IIIc	23.5525	0.773099	1.10714	1.0688	0.301602	0.515397	0.811025			lncRNA:CR46032	0	0	0	0	0	0	0			lncRNA:CR44561	0	0	0	0	0	0	0			Ir56e	0	0	0	0	0	0	0			lncRNA:CR45647	0	0	0	0	0	0
			asRNA:CR45104	0.0342254	0.152276	0.872394	0.0424401	0.19611	0	0.0208642			Ir94a	0	0	0	0	0	0	0			lncRNA:CR44543	0	0	0	0	0	0	0			CG43090	0	0	0	0	0	0	0			CR46405	0	0	0	0	0	0
			lncRNA:CR44674	0	0	0	0	0	0	0			tRNA:Ser-GCT-2-5	0	0	0	0	0	0	0			lncRNA:CR44566	0	0	0	0	0	0	0			CG43111	0	0	0	0	0	0	0			dpr4	1.63014	0.900403	1.66305	0.677449	0.487942	0.0450859
			lncRNA:CR43654	0.0104215	0.090594	0.220863	0.0256363	0.0426046	0	0.015077			asRNA:CR46050	0	0	0	0	0	0	0			lncRNA:CR45628	0	0	0	0	0	0	0			lncRNA:CR43130	0	0	0	0	0	0	0			lncRNA:CR45644	0	0	0	0	0	0
			Evi5	23.4419	0.208449	0.410185	0.602691	0.449622	0.722036	0.12365			lncRNA:CR46052	0	0	0	0	0	0	0			CG44569	0	0	0	0	0	0	0			lncRNA:CR44199	0	0	0	0	0	0	0			Sec16	1.91625	0.830705	1.60966	0.582669	0.56825	0.0450859
			lncRNA:CR44684	0	0	0	0	0	0	0			lncRNA:CR45811	0	0	0	0	0	0	0			lncRNA:CR45296	0	0	0	0	0	0	0			lncRNA:CR44146	0	0	0	0	0	0	0			lncRNA:CR45645	0	0	0	0	0	0
			cpo	93.7917	0.130337	0.228916	0.895186	0.381659	0.777696	0.194909			tRNA:Ser-GCT-1-1	0	0	0	0	0	0	0			lncRNA:CR44540	0	0	0	0	0	0	0			lncRNA:CR42839	0	0	0	0	0	0	0			RhoGEF2	1.12302	0.882799	1.90002	0.613341	0.47011	0.0450859
			asRNA:CR45053	0	0	0	0	0	0	0			lncRNA:CR46028	0	0	0	0	0	0	0			lncRNA:CR44562	0	0	0	0	0	0	0			Np	0	0	0	0	0	0	0			lncRNA:CR45646	0	0	0	0	0	0
			lncRNA:CR44672	0	0	0	0	0	0	0			lncRNA:CR45810	0	0	0	0	0	0	0			lncRNA:CR44503	0	0	0	0	0	0	0			CG42853	0	0	0	0	0	0	0			Usp2	10.4367	0.293007	0.583285	0.582701	0.552978	0.432721
			lncRNA:CR44680	0	0	0	0	0	0	0			lncRNA:CR46030	0	0	0	0	0	0	0			lncRNA:CR44502	0	0	0	0	0	0	0			lncRNA:CR44034	0	0	0	0	0	0	0			lncRNA:CR45578	0.00664778	0.05127	0.160628	0.0145084	0.0340721	0
			Ubqn	5.28935	0.399947	0.923084	0.399899	0.536324	0.185671	0.167453			tRNA:Asp-GTC-1-1	0	0	0	0	0	0	0			lncRNA:CR44560	0	0	0	0	0	0	0			CR42838	0	0	0	0	0	0	0			Dscam3	4.45036	0.520481	0.990445	0.686907	0.431246	0.158971
			lncRNA:CR44771	0.0343011	0.115658	0.608614	0.0284586	0.137928	0	0.0191905			CG31913	0	0	0	0	0	0	0			lncRNA:CR44501	0	0	0	0	0	0	0			lncRNA:CR42858	0	0	0	0	0	0	0			lncRNA:CR45655	0	0	0	0	0	0
			lncRNA:CR43408	0.00702213	-0.00157554	0.220863	-0.000445848	0.0621443	0	-3.90568e-06			tRNA:Gln-CTG-2-4	0	0	0	0	0	0	0			lncRNA:CR44480	0	0	0	0	0	0	0			eIF4E3	0	0	0	0	0	0	0			CG11247	10.2697	0.477275	0.593811	0.960389	0.363121	0.344242
			lncRNA:CR43991	0.00961619	0.0706622	0.220863	0.019996	0.0468135	0	0.00886872			CG31219	0	0	0	0	0	0	0			lncRNA:CR44568	0	0	0	0	0	0	0			lncRNA:CR44033	0	0	0	0	0	0	0			CG46321	0	0	0	0	0	0
			cindr	80.3653	0.15434	0.260129	0.685764	0.440163	0.782622	0.117855			tRNA:Gln-CTG-3-1	0	0	0	0	0	0	0			lncRNA:CR44559	0	0	0	0	0	0	0			CG42837	0	0	0	0	0	0	0			CG43901	4.19423	0.669214	0.946221	0.824558	0.388792	0.152798
			inaE	31.7676	0.141779	0.33265	0.676955	0.394028	0.827279	0.0995722			lncRNA:CR45965	0.0104689	-0.00925312	0.220863	-0.00261845	0.0604114	0	-0.000136587			lncRNA:CR44557	0	0	0	0	0	0	0			asRNA:CR44155	0	0	0	0	0	0	0			comm	5.07034	0.745993	1.0763	0.893155	0.42405	0.170642
			RpL24	145.988	0.124265	0.177615	0.804608	0.457819	0.798445	0.128603			CG31131	0	0	0	0	0	0	0			lncRNA:CR44473	0	0	0	0	0	0	0			CG44158	0	0	0	0	0	0	0			lncRNA:CR45333	10.1876	0.566025	0.914915	0.885831	0.356488	0.344396
			Phae2	0	0	0	0	0	0	0			CG31128	0	0	0	0	0	0	0			lncRNA:CR44482	0	0	0	0	0	0	0			CG42808	0	0	0	0	0	0	0			lncRNA:let7C	2.34183	0.651032	1.19883	0.648516	0.50072	0.0450859
			lncRNA:CR44654	0	0	0	0	0	0	0			asRNA:CR46047	0	0	0	0	0	0	0			lncRNA:CR44483	0	0	0	0	0	0	0			lncRNA:CR42859	0	0	0	0	0	0	0			lncRNA:CR45653	0	0	0	0	0	0
			lncRNA:CR44593	0	0	0	0	0	0	0			asRNA:CR45814	0	0	0	0	0	0	0			lncRNA:CR44484	0	0	0	0	0	0	0			CG42857	0	0	0	0	0	0	0			lncRNA:CR45651	0	0	0	0	0	0
			lncRNA:CR44646	0	0	0	0	0	0	0			lncRNA:CR46046	0	0	0	0	0	0	0			lncRNA:CR44487	0	0	0	0	0	0	0			lncRNA:CR44156	0	0	0	0	0	0	0			Prp39	9.42245	0.42484	0.57697	0.861777	0.421198	0.359931
			CR43975	0.157631	0.210485	0.762252	0.105478	0.229686	0	0.0522511			tRNA:Leu-CAA-2-3	0	0	0	0	0	0	0			lncRNA:CR44485	0	0	0	0	0	0	0			lncRNA:CR42790	0	0	0	0	0	0	0			mt:ND4L	0.487054	0.557075	2.58091	0.205935	0.744532	0.0450859
			lncRNA:CR44547	0	0	0	0	0	0	0			tRNA:Leu-TAA-4-1	0	0	0	0	0	0	0			lncRNA:CR44925	0	0	0	0	0	0	0			dpr2	0	0	0	0	0	0	0			asRNA:CR46137	0.0939276	0.369025	1.27438	0.115136	0.315893	0
			lncRNA:CR44652	0	0	0	0	0	0	0			asRNA:CR46038	0	0	0	0	0	0	0			lncRNA:CR44488	0	0	0	0	0	0	0			d	0	0	0	0	0	0	0			CG46320	0	0	0	0	0	0
			lncRNA:CR44726	0	0	0	0	0	0	0			asRNA:CR46045	0	0	0	0	0	0	0			lncRNA:CR44470	0	0	0	0	0	0	0			asRNA:CR44182	0	0	0	0	0	0	0			CG46319	0	0	0	0	0	0
			CG43843	0.062529	0.259129	1.29082	0.0723412	0.316098	0.0624704	0.0365221			CG32119	0	0	0	0	0	0	0			lncRNA:CR44558	0	0	0	0	0	0	0			lncRNA:CR44212	0	0	0	0	0	0	0			CR45470	0.00845306	0.0564437	0.153777	0.0166841	0.0324355	0
			lncRNA:CR44594	0	0	0	0	0	0	0			lncRNA:CR45887	0	0	0	0	0	0	0			lncRNA:CR44508	0	0	0	0	0	0	0			lncRNA:CR44208	0	0	0	0	0	0	0			Pen	0.0276516	0.139678	0.796286	0.0401664	0.189183	0
			GPHR	6.3336	0.371248	1.08807	0.51784	0.510223	0.248155	0.273131			CG31121	0	0	0	0	0	0	0			lncRNA:CR44486	0	0	0	0	0	0	0			CG43131	0	0	0	0	0	0	0			Pits	64.8522	0.24302	0.247171	1.13381	0.320301	0.566104
			asRNA:CR44653	0	0	0	0	0	0	0			lncRNA:CR46039	0	0	0	0	0	0	0			lncRNA:CR44924	0	0	0	0	0	0	0			lncRNA:CR44200	0	0	0	0	0	0	0			zyd	0.00871185	0.0687228	0.321256	0.0194472	0.0755396	0
			lncRNA:CR44545	0	0	0	0	0	0	0			GABA-B-R1	17.148	-0.162345	0.774293	0.71919	0.339587	0.766768	0.0501048			lncRNA:CR44859	0	0	0	0	0	0	0			asRNA:CR44207	0	0	0	0	0	0	0			disco-r	4.73957	0.583686	1.32442	0.552828	0.308555	0.00853638
			lncRNA:CR44546	0	0	0	0	0	0	0			lncRNA:CR46043	0	0	0	0	0	0	0			CG44475	0	0	0	0	0	0	0			lncRNA:CR44172	0	0	0	0	0	0	0			lncRNA:CR44538	0.0193396	0.0878485	0.125457	0.0318286	0.0219902	0
			lncRNA:CR44725	0	0	0	0	0	0	0			asRNA:CR45924	0	0	0	0	0	0	0			asRNA:CR44840	0	0	0	0	0	0	0			asRNA:CR44168	0	0	0	0	0	0	0			CG46318	0	0	0	0	0	0
			lncRNA:CR44549	0	0	0	0	0	0	0			tRNA:Ala-AGC-2-8	0	0	0	0	0	0	0			lncRNA:CR44564	0	0	0	0	0	0	0			CG43088	0	0	0	0	0	0	0			lncRNA:CR45480	0.00448402	0.0444113	0.160628	0.0125675	0.0355534	0
			lncRNA:CR44550	0	0	0	0	0	0	0			CG46026	0	0	0	0	0	0	0			lncRNA:CR44860	0	0	0	0	0	0	0			asRNA:CR44083	0	0	0	0	0	0	0			CG46316	0	0	0	0	0	0
			lncRNA:CR44999	0.030544	0.0385042	0.603294	0.0133637	0.17389	0	0.00195657			CG31141	0	0	0	0	0	0	0			lncRNA:CR44479	0	0	0	0	0	0	0			lncRNA:CR44074	0	0	0	0	0	0	0			Ca-beta	6.44491	0.462576	0.794447	0.806618	0.467636	0.194345
			lncRNA:CR43256	0.0384611	0.130093	1.10283	0.0369876	0.243269	0	0.0167217			ctp	134.227	-0.0363612	0.226818	0.627386	0.374889	0.876749	-0.189304			lncRNA:CR44928	0	0	0	0	0	0	0			lncRNA:CR44076	0	0	0	0	0	0	0			PPP4R2r	13.4857	0.394551	0.587605	0.72637	0.486964	0.442331
			Phae1	0	0	0	0	0	0	0			asRNA:CR46044	0	0	0	0	0	0	0			lncRNA:CR44489	0	0	0	0	0	0	0			svp	2.34892	1.25891	1.29513	0.757743	0.209681	0	0.867009			lncRNA:CR45657	0	0	0	0	0	0
			lncRNA:CR45055	0	0	0	0	0	0	0			lncRNA:CR46011	0	0	0	0	0	0	0			lncRNA:CR44929	0	0	0	0	0	0	0			CG43089	0	0	0	0	0	0	0			lncRNA:CR45482	0.00490237	0.0444113	0.160628	0.0125675	0.0355534	0
			lncRNA:CR44779	0.0416768	0.153318	0.812973	0.0420148	0.190388	0	0.0220033			CG2200	1.49576	0.717517	1.45779	0.494971	0.535536	0.436766	0.302788			lncRNA:CR44927	0	0	0	0	0	0	0			lncRNA:CR44082	0	0	0	0	0	0	0			CG42458	6.06312	0.654281	0.901853	0.654869	0.381597	0.204606
			asRNA:CR45056	0	0	0	0	0	0	0			CG42580	0	0	0	0	0	0	0			lncRNA:CR44481	0	0	0	0	0	0	0			lncRNA:CR44036	0	0	0	0	0	0	0			lncRNA:CR44553	0.00911215	0.0792128	0.321256	0.0224157	0.0732328	0
			CG43337	0.00437809	0.0213444	0.220863	0.00604004	0.0576882	0	0.00074263			CG43115	0.00497099	-0.0620769	0.220863	-0.0175665	0.0486663	0	-0.00674476			lncRNA:CR44505	0	0	0	0	0	0	0			asRNA:CR44064	0	0	0	0	0	0	0			lncRNA:acal	0.0260109	0.146498	0.626375	0.0432346	0.147394	0
			CG43403	0.00702213	-0.00157554	0.220863	-0.000445848	0.0621443	0	-3.90568e-06			tRNA:Ala-AGC-2-11	0	0	0	0	0	0	0			CR44839	0	0	0	0	0	0	0			asRNA:CR44205	0	0	0	0	0	0	0			hbt	9.87701	0.503376	0.825414	0.841897	0.440003	0.355738
			lncRNA:CR44651	0	0	0	0	0	0	0			asRNA:CR46049	0	0	0	0	0	0	0			lncRNA:CR44511	0	0	0	0	0	0	0			lncRNA:CR44173	0	0	0	0	0	0	0			CR45497	0	0	0	0	0	0
			CR43383	0	0	0	0	0	0	0			lncRNA:CR46010	0	0	0	0	0	0	0			lncRNA:CR44842	0	0	0	0	0	0	0			mtsh	0	0	0	0	0	0	0			Nrt	10.5709	0.504886	0.646217	0.879221	0.333188	0.328966
			lncRNA:CR43387	0	0	0	0	0	0	0			asRNA:CR44035	0.00700126	-0.0822326	0.220863	-0.0232702	0.0443532	0.0624961	-0.0122489			lncRNA:CR44469	0	0	0	0	0	0	0			CG44037	0	0	0	0	0	0	0			CR45496	0	0	0	0	0	0
			lncRNA:CR45059	0	0	0	0	0	0	0			lncRNA:CR44138	0.0206216	-0.0316274	0.441472	-0.00893904	0.103011	0.0624989	-0.00557749			lncRNA:CR44468	0	0	0	0	0	0	0			asRNA:CR44063	0	0	0	0	0	0	0			CR45498	0	0	0	0	0	0
			CG43386	0	0	0	0	0	0	0			Top3beta	2.27897	0.613751	1.37158	0.535955	0.525901	0.56167	0.27935			lncRNA:CR44466	0	0	0	0	0	0	0			CG43049	0	0	0	0	0	0	0			lncRNA:CR46062	0.0161634	0.0981746	0.320628	0.0278643	0.0692886	0
			lncRNA:CR44650	0	0	0	0	0	0	0			lncRNA:CR45996	0.0434284	0.0670685	0.677087	0.0160755	0.126272	0.0624816	0.027982			lncRNA:CR44926	0	0	0	0	0	0	0			asRNA:CR44035	0	0	0	0	0	0	0			CR45499	0	0	0	0	0	0
			lncRNA:CR43605	0	0	0	0	0	0	0			CG31337	0.0202392	-0.0119562	0.445699	-0.00217679	0.110868	0.0624816	-0.00105393			asRNA:CR44509	0	0	0	0	0	0	0			CG42878	0	0	0	0	0	0	0			Lim1	21.9868	0.672855	1.33884	0.949944	0.359725	0.186775
			lncRNA:CR44649	0	0	0	0	0	0	0			CG31609	0	0	0	0	0	0	0			lncRNA:CR44834	0	0	0	0	0	0	0			mir-iab-8	0	0	0	0	0	0	0			lncRNA:CR45500	0	0	0	0	0	0
			lncRNA:CR43358	0	0	0	0	0	0	0			CG31220	0	0	0	0	0	0	0			lncRNA:CR44930	0	0	0	0	0	0	0			lncRNA:CR44066	0	0	0	0	0	0	0			lncRNA:CR45658	0	0	0	0	0	0
			lncRNA:CR44675	0	0	0	0	0	0	0			lncRNA:CR44446	0	0	0	0	0	0	0			lncRNA:CR44510	0	0	0	0	0	0	0			CG42815	0	0	0	0	0	0	0			lncRNA:CR45656	0	0	0	0	0	0
			lncRNA:CR43974	0.00405749	0.0213444	0.220863	0.00604004	0.0576882	0	0.00074263			XNP	3.57585	0.203795	0.982763	0.298539	0.630864	0.624046	0.0700375			lncRNA:CR44931	0	0	0	0	0	0	0			CheA46a	0	0	0	0	0	0	0			CG46317	0	0	0	0	0	0
			CR43360	0	0	0	0	0	0	0			CR45879	0	0	0	0	0	0	0			asRNA:CR44512	0	0	0	0	0	0	0			pre-mod(mdg4)-X	0	0	0	0	0	0	0			zfh2	6.73158	0.713864	0.972618	1.00502	0.339533	0.142446
			CR43382	0	0	0	0	0	0	0			lncRNA:CR45900	0	0	0	0	0	0	0			CG44476	0	0	0	0	0	0	0			lncRNA:CR44190	0	0	0	0	0	0	0			CG45494	0	0	0	0	0	0
			lncRNA:CR44953	0.0383901	0.173707	0.867106	0.0501587	0.210661	0	0.0209835			asRNA:CR44165	0.0121713	-0.0994202	0.220863	-0.028134	0.0407879	0	-0.0184274			lncRNA:CR44823	0	0	0	0	0	0	0			CG42762	0	0	0	0	0	0	0			CR45495	0	0	0	0	0	0
			lncRNA:CR44517	0.103798	0.0781223	0.664242	0.00492132	0.187123	0	-0.00290945			lncRNA:CR44221	0.0163541	-0.117223	0.199199	-0.0367796	0.0347634	0	-0.0298635			lncRNA:CR44829	0	0	0	0	0	0	0			CG43125	0	0	0	0	0	0	0			CG45493	0	0	0	0	0	0
			lncRNA:CR44647	0	0	0	0	0	0	0			CG31681	0	0	0	0	0	0	0			CG44477	0	0	0	0	0	0	0			CG43124	0	0	0	0	0	0	0			lncRNA:CR45503	0	0	0	0	0	0
			CR43385	0	0	0	0	0	0	0			lncRNA:CR44177	0.00276926	-0.0620769	0.220863	-0.0175665	0.0486663	0	-0.00674476			lncRNA:CR44932	0	0	0	0	0	0	0			CG43127	0	0	0	0	0	0	0			CG46315	0	0	0	0	0	0
			CR43384	0	0	0	0	0	0	0			Cmpk	19.0351	0.127821	0.509772	0.375474	0.576822	0.748904	0.0591348			lncRNA:CR44491	0	0	0	0	0	0	0			CG44038	0	0	0	0	0	0	0			lncRNA:CR45670	0	0	0	0	0	0
			lncRNA:CR44677	0	0	0	0	0	0	0			Tengl1	0	0	0	0	0	0	0			lncRNA:CR44524	0	0	0	0	0	0	0			CG43050	0	0	0	0	0	0	0			lncRNA:CR45574	0.0118874	0.0715089	0.15855	0.0205008	0.0296353	0
			CG45075	0	0	0	0	0	0	0			CG31244	0	0	0	0	0	0	0			lncRNA:CR44852	0	0	0	0	0	0	0			lncRNA:CR44226	0	0	0	0	0	0	0			lncRNA:CR45483	0	0	0	0	0	0
			lncRNA:CR44634	0	0	0	0	0	0	0			lncRNA:CR46007	0	0	0	0	0	0	0			CG11523	3.83065	0.221689	0.913061	0.244729	0.672747	0.691282	0.0929191			lncRNA:CR44125	0	0	0	0	0	0	0			otk2	1.02307	1.11413	1.94363	0.642863	0.455219	0.0450859
			asRNA:CR45874	2.73279	0.361778	1.26714	0.353667	0.642006	0.185671	0.141287			lncRNA:CR46013	0	0	0	0	0	0	0			lncRNA:CR44920	0	0	0	0	0	0	0			CG43123	0	0	0	0	0	0	0			lncRNA:CR45512	0	0	0	0	0	0
			lncRNA:CR44980	0	0	0	0	0	0	0			lncRNA:CR44854	0.0961076	0.151688	0.204497	0.0943595	0.0581167	0	0.0607843			lncRNA:CR44556	0	0	0	0	0	0	0			lncRNA:CR44204	0	0	0	0	0	0	0			lncRNA:CR45508	0	0	0	0	0	0
			CR44659	0	0	0	0	0	0	0			lncRNA:CR46022	0	0	0	0	0	0	0			lncRNA:CR44854	0	0	0	0	0	0	0			lncRNA:CR42791	0	0	0	0	0	0	0			lncRNA:CR45502	0	0	0	0	0	0
			lncRNA:CR44979	0	0	0	0	0	0	0			lncRNA:CR46023	0	0	0	0	0	0	0			pre-mod(mdg4)-I	0	0	0	0	0	0	0			CG42792	0	0	0	0	0	0	0			lncRNA:CR45507	0	0	0	0	0	0
			Rap1	49.0706	0.188391	0.287151	0.745741	0.453747	0.81585	0.226025			asRNA:CR46012	0	0	0	0	0	0	0			lncRNA:CR44933	0	0	0	0	0	0	0			fd3F	0	0	0	0	0	0	0			CG45486	0	0	0	0	0	0
			CG43694	0	0	0	0	0	0	0			CG31226	0	0	0	0	0	0	0			Prps	14.9345	0.141737	0.420147	0.321	0.663962	0.998254	0.0647268			lncRNA:CR42794	0	0	0	0	0	0	0			lncRNA:CR45511	0	0	0	0	0	0
			lncRNA:CR44683	0	0	0	0	0	0	0			CG31207	0	0	0	0	0	0	0			lncRNA:CR45297	0	0	0	0	0	0	0			lncRNA:CR44203	0	0	0	0	0	0	0			lncRNA:CR45510	0	0	0	0	0	0
			lncRNA:CR44658	0	0	0	0	0	0	0			AstC-R1	0.509661	0.473361	2.01242	0.260575	0.500539	0.374339	0.183306			lncRNA:CR45211	0.00832053	0.0200454	0.271832	0.00567245	0.0724012	0	0.00052741			lncRNA:CR44039	0	0	0	0	0	0	0			lncRNA:CR45576	0	0	0	0	0	0
			Fak	7.54087	0.261547	0.805267	0.451395	0.632914	0.249021	0.119593			CG42586	0	0	0	0	0	0	0			lncRNA:CR44940	0	0	0	0	0	0	0			pre-mod(mdg4)-Y	0	0	0	0	0	0	0			CG45487	0	0	0	0	0	0
			CG45069	0	0	0	0	0	0	0			Ddc	31.0348	0.0985712	0.820087	1.53037	0.261057	0.583277	0.909185			asRNA:CR44910	0	0	0	0	0	0	0			CG44040	0	0	0	0	0	0	0			lncRNA:CR45509	0	0	0	0	0	0
			lncRNA:CR44643	0	0	0	0	0	0	0			CG34338	0.0266941	0.115397	0.389712	0.0371959	0.0957594	0	0.0133522			lncRNA:CR44851	0	0	0	0	0	0	0			lncRNA:CR44041	0	0	0	0	0	0	0			lncRNA:CR45505	0	0	0	0	0	0
			lncRNA:CR44645	0	0	0	0	0	0	0			CG42585	0	0	0	0	0	0	0			lncRNA:CR44937	0	0	0	0	0	0	0			lncRNA:CR44221	0	0	0	0	0	0	0			lncRNA:CR45973	0.0235465	0.10873	0.620564	0.0311301	0.157164	0
			lncRNA:CR44639	0	0	0	0	0	0	0			tRNA:Pro-TGG-1-5	0	0	0	0	0	0	0			lncRNA:CR44465	0	0	0	0	0	0	0			asRNA:CR44192	0	0	0	0	0	0	0			CG45489	0	0	0	0	0	0
			lncRNA:CR44641	0	0	0	0	0	0	0			asRNA:CR45960	0.00585872	-0.0256364	0.220863	-0.00725459	0.0567246	0	-0.0010795			asRNA:CR44850	0	0	0	0	0	0	0			pre-mod(mdg4)-Z	0	0	0	0	0	0	0			CG45488	0	0	0	0	0	0
			lncRNA:CR44642	0	0	0	0	0	0	0			CG31189	0	0	0	0	0	0	0			lncRNA:CR44846	0	0	0	0	0	0	0			lncRNA:CR44225	0	0	0	0	0	0	0			CG45492	0	0	0	0	0	0
			lncRNA:CR44640	0	0	0	0	0	0	0			Ir94f	0	0	0	0	0	0	0			lncRNA:CR44848	0	0	0	0	0	0	0			mid	0	0	0	0	0	0	0			CG46314	0	0	0	0	0	0
			lncRNA:CR44644	0	0	0	0	0	0	0			CG1648	7.99588	0.672294	1.50495	1.43575	0.321098	0.570441	2.19584			lncRNA:CR44941	0	0	0	0	0	0	0			lncRNA:CR44232	0	0	0	0	0	0	0			CG45491	0	0	0	0	0	0
			lncRNA:CR44638	0	0	0	0	0	0	0			CG9674	7.9135	0.600863	1.03545	0.630906	0.507155	0.624109	0.416844			asRNA:CR44849	0	0	0	0	0	0	0			lncRNA:CR44187	0	0	0	0	0	0	0			lncRNA:CR45455	0	0	0	0	0	0
			CG45072	0	0	0	0	0	0	0			Irk1	0.0111276	-0.152244	0.220863	-0.0430821	0.0306641	0	-0.0470813			lncRNA:CR44936	0	0	0	0	0	0	0			lncRNA:CR44186	0	0	0	0	0	0	0			Syn2	4.34091	0.663558	1.02967	0.695519	0.504232	0.203214
			lncRNA:CR43695	0	0	0	0	0	0	0			CG31233	0	0	0	0	0	0	0			lncRNA:CR44939	0	0	0	0	0	0	0			lncRNA:CR44121	0	0	0	0	0	0	0			lncRNA:CR44564	0.00448402	0.0444113	0.160628	0.0125675	0.0355534	0
			lncRNA:CR44636	0	0	0	0	0	0	0			lncRNA:CR44150	0.0111276	-0.152244	0.220863	-0.0430821	0.0306641	0	-0.0470813			lncRNA:CR44467	0	0	0	0	0	0	0			CR42842	0	0	0	0	0	0	0			lncRNA:CR45667	0	0	0	0	0	0
			lncRNA:CR44635	0	0	0	0	0	0	0			CG34316	0.0167338	0.105809	0.441726	0.0299419	0.101519	0.0624989	0.0127913			lncRNA:CR44935	0	0	0	0	0	0	0			lncRNA:CR44185	0	0	0	0	0	0	0			lncRNA:CR44949	0.0166433	0.0957974	0.321097	0.0271213	0.0695907	0
			caz	2.84165	0.457823	1.31514	0.498305	0.5222	0.185671	0.469583			tRNA:Gly-TCC-1-3	0	0	0	0	0	0	0			asRNA:CR44847	0	0	0	0	0	0	0			CG44227	0	0	0	0	0	0	0			CG46313	0	0	0	0	0	0
			PIP4K	48.2146	0.141709	0.265615	0.680027	0.464178	0.854727	0.0984534			CanB	37.3143	-0.378202	0.807508	0.528151	0.447842	0.770332	-0.705902			lncRNA:CR44861	0	0	0	0	0	0	0			CG44194	0	0	0	0	0	0	0			lncRNA:CR45666	0	0	0	0	0	0
			RpS28b	108.192	0.128663	0.200722	0.771788	0.52961	0.79826	0.138921			lncRNA:CR44411	0	0	0	0	0	0	0			lncRNA:CR44934	0	0	0	0	0	0	0			lncRNA:CR44189	0	0	0	0	0	0	0			CG46309	0	0	0	0	0	0
			lncRNA:CR43881	0.00831421	0.000426933	0.220863	0.000120814	0.0624036	0	2.8619e-07			CanA-14F	13.1555	0.304153	0.515325	0.817801	0.375467	0.800212	0.320559			lncRNA:CR44513	0	0	0	0	0	0	0			pre-mod(mdg4)-U	0	0	0	0	0	0	0			lncRNA:CR45661	0	0	0	0	0	0
			jv	0.0335817	0.0956217	0.667188	0.026731	0.166342	0.0624704	0.00776089			CG31274	0.00276926	-0.0620769	0.220863	-0.0175665	0.0486663	0	-0.00674476			lncRNA:CR44490	0	0	0	0	0	0	0			lncRNA:CR44217	0	0	0	0	0	0	0			asRNA:CR46097	0.0345641	0.172694	0.621149	0.0495339	0.142948	0
			lncRNA:CR43436	0.0164693	-0.00678621	0.441726	-0.00192036	0.0861472	0	-0.00235754			His-Psi:CR31616	0	0	0	0	0	0	0			lncRNA:CR44538	0	0	0	0	0	0	0			Ir60f	0	0	0	0	0	0	0			asRNA:CR45663	0	0	0	0	0	0
			eIF4G2	8.87547	0.396467	0.736696	0.949825	0.421376	0.268002	0.469206			CG43095	0.0206193	-0.152244	0.200157	-0.0475389	0.0279301	0	-0.0532561			lncRNA:CR44830	0	0	0	0	0	0	0			snoRNA:Or-CD9a	0	0	0	0	0	0	0			lncRNA:CR45665	0	0	0	0	0	0
			lncRNA:CR44408	0.0345875	0.133494	0.656356	0.0366823	0.139502	0.0624704	0.0244768			enc	7.05288	0.174612	0.878447	0.399445	0.552298	0.686466	0.102374			lncRNA:CR44515	0	0	0	0	0	0	0			lncRNA:CR44216	0	0	0	0	0	0	0			lncRNA:CR45568	0	0	0	0	0	0
			asRNA:CR44910	0.00405749	0.0213444	0.220863	0.00604004	0.0576882	0	0.00074263			lncRNA:CR44353	0.0122916	-0.0189307	0.475893	-0.00600947	0.113514	0.0624689	-0.00177211			lncRNA:CR44912	0	0	0	0	0	0	0			CG42789	0	0	0	0	0	0	0			lncRNA:CR45664	0	0	0	0	0	0
			CG45073	0	0	0	0	0	0	0			psq	16.5702	0.412549	0.414414	0.91711	0.327104	0.841728	0.776961			lncRNA:CR44492	0	0	0	0	0	0	0			snoRNA:Or-CD9b	0	0	0	0	0	0	0			CG46312	0	0	0	0	0	0
			CR43697	0	0	0	0	0	0	0			lncRNA:CR44060	0.0165615	-0.113298	0.177496	-0.0398947	0.0327043	0.0624989	-0.031868			CG44521	0	0	0	0	0	0	0			Mzt1	0	0	0	0	0	0	0			kug	3.14212	0.541093	1.12781	0.431892	0.542051	0.103793
			lncRNA:CR43882	0	0	0	0	0	0	0			lncRNA:CR44401	0	0	0	0	0	0	0			dcma	5.13917	0.764549	1.65619	0.649572	0.547311	0.768075	0.677777			lncRNA:CR44057	0	0	0	0	0	0	0			CG46310	0	0	0	0	0	0
			CG43938	0	0	0	0	0	0	0			lncRNA:CR44410	0	0	0	0	0	0	0			lncRNA:CR45226	0.00643408	0.0200454	0.271832	0.00567245	0.0724012	0	0.00052741			lncRNA:CR44191	0	0	0	0	0	0	0			lncRNA:CR45662	0	0	0	0	0	0
			asRNA:CR43971	0	0	0	0	0	0	0			asRNA:CR44124	0.0202445	-0.0995165	0.441726	-0.0281612	0.0963294	0	-0.0252577			lncRNA:CR46008	0.0211854	0.0502443	0.543663	0.0142182	0.12091	0	0.0111765			lncRNA:CR44188	0	0	0	0	0	0	0			CR45458	0	0	0	0	0	0
			lncRNA:CR44918	0	0	0	0	0	0	0			lncRNA:CR44419	0	0	0	0	0	0	0			lncRNA:CR44520	0	0	0	0	0	0	0			CR42785	0	0	0	0	0	0	0			lncRNA:CR44567	0.00441116	0.048933	0.160628	0.0138471	0.0345747	0
			lncRNA:CR43706	0	0	0	0	0	0	0			lncRNA:CR43910	0.0436386	0.0690123	0.434712	0.0196023	0.109607	0.0624816	0.00835178			lncRNA:CR44519	0	0	0	0	0	0	0			lncRNA:CR44229	0	0	0	0	0	0	0			CG46311	0	0	0	0	0	0
			Not1	22.5387	0.191445	0.388711	0.528369	0.448608	0.892631	0.102187			CG44403	0	0	0	0	0	0	0			lncRNA:CR44494	0	0	0	0	0	0	0			CG43054	0	0	0	0	0	0	0			lncRNA:CR45560	0	0	0	0	0	0
			RabX6	2.82382	0.523336	1.2166	0.331267	0.641208	0.185671	0.249703			lncRNA:CR42868	0.00932943	-0.0822326	0.220863	-0.0232702	0.0443532	0.0624961	-0.0122489			lncRNA:CR44921	0	0	0	0	0	0	0			lncRNA:CR44196	0	0	0	0	0	0	0			lncRNA:CR45569	0	0	0	0	0	0
			Stat92E	7.80622	0.25512	0.847979	0.360581	0.655331	0.245582	0.0662881			CG34205	0.0125571	0.0754819	0.441726	0.0213599	0.108067	0.0624989	0.00538303			lncRNA:CR44516	0	0	0	0	0	0	0			CG31327	0	0	0	0	0	0	0			Hipk	16.4514	0.3396	0.502025	0.910654	0.404351	0.443479
			lncRNA:CR43937	0	0	0	0	0	0	0			CG42583	0	0	0	0	0	0	0			lncRNA:CR44886	0	0	0	0	0	0	0			CG43052	0	0	0	0	0	0	0			CG46308	0	0	0	0	0	0
			Cngl	150.684	0.0544772	0.296552	0.741448	0.34763	0.703308	0.0247581			CG42587	0	0	0	0	0	0	0			lncRNA:CR44909	0	0	0	0	0	0	0			lncRNA:CR44126	0	0	0	0	0	0	0			lncRNA:CR44556	0.0139911	0.107881	0.147743	0.0331907	0.0211487	0
			CG43348	0.00514684	0.00192749	0.220863	0.000545443	0.0620648	0	5.84922e-06			CG42581	0	0	0	0	0	0	0			lncRNA:CRG	0	0	0	0	0	0	0			CG44195	0	0	0	0	0	0	0			asRNA:CR45468	0	0	0	0	0	0
			tai	29.8374	0.171056	0.330269	0.591358	0.537671	0.867995	0.16377			CG43092	0.0235067	-0.165919	0.187007	-0.055452	0.0234346	0.0624261	-0.0706849			lncRNA:CR44518	0	0	0	0	0	0	0			lncRNA:CR44197	0	0	0	0	0	0	0			lncRNA:CR45564	0	0	0	0	0	0
			CG43332	0	0	0	0	0	0	0			lncRNA:CR44421	0	0	0	0	0	0	0			lncRNA:CR44862	0	0	0	0	0	0	0			CG44215	0	0	0	0	0	0	0			asRNA:CR45466	0	0	0	0	0	0
			lncRNA:CR45557	0.449914	0.531026	1.57425	0.262178	0.458214	0.124414	0.214168			lncRNA:CR44407	0	0	0	0	0	0	0			asRNA:CR44907	0	0	0	0	0	0	0			lncRNA:CR44058	0	0	0	0	0	0	0			asRNA:CR45467	0	0	0	0	0	0
			Ing5	4.55876	0.374525	0.897812	0.450565	0.55164	0.186912	0.324501			lncRNA:CR44420	0	0	0	0	0	0	0			lncRNA:CR44827	0	0	0	0	0	0	0			lncRNA:CR44048	0	0	0	0	0	0	0			CG46302	0.0042669	0.0243116	0.160628	0.0068797	0.0399862	0
			l(1)G0196	10.6571	0.313195	0.59055	0.491116	0.479641	0.472451	0.221958			CR44391	0	0	0	0	0	0	0			lncRNA:CR44908	0	0	0	0	0	0	0			CG42781	0	0	0	0	0	0	0			shg	0.544364	0.765432	2.06309	0.347478	0.554132	0.0450859
			lncRNA:CR43939	0	0	0	0	0	0	0			CG42591	0	0	0	0	0	0	0			lncRNA:CR44888	0	0	0	0	0	0	0			CG43114	0	0	0	0	0	0	0			lncRNA:CR45561	0	0	0	0	0	0
			asRNA:CR44724	0	0	0	0	0	0	0			CG42592	0	0	0	0	0	0	0			lncRNA:CR44889	0	0	0	0	0	0	0			CG44198	0	0	0	0	0	0	0			lncRNA:CR45567	0	0	0	0	0	0
			CG45002	10.6353	0.198744	0.756898	0.501268	0.519171	0.459636	0.108601			lncRNA:CR44395	0	0	0	0	0	0	0			Tgs1	0	0	0	0	0	0	0			vnd	0	0	0	0	0	0	0			lncRNA:CR45562	0	0	0	0	0	0
			CR43696	0	0	0	0	0	0	0			lncRNA:CR44418	0	0	0	0	0	0	0			asRNA:CR44891	0	0	0	0	0	0	0			srw	0	0	0	0	0	0	0			lncRNA:CR46036	0.0188239	0.069673	0.292067	0.0208776	0.0744607	0
			Pldn	2.42603	0.315835	1.44401	0.307507	0.601757	0.185671	0.106431			lncRNA:CR44393	0	0	0	0	0	0	0			lncRNA:CR44885	0	0	0	0	0	0	0			pre-mod(mdg4)-AD	0	0	0	0	0	0	0			lncRNA:CR44525	0.00353319	0.0530535	0.172764	0.0139585	0.0344899	0
			asRNA:CR44975	0	0	0	0	0	0	0			CG44406	0	0	0	0	0	0	0			CR44906	0	0	0	0	0	0	0			Tep5Psi	0	0	0	0	0	0	0			lncRNA:CR45465	0	0	0	0	0	0
			lncRNA:CR44379	0	0	0	0	0	0	0			asRNA:CR44416	0	0	0	0	0	0	0			lncRNA:CR44923	0	0	0	0	0	0	0			asRNA:CR44228	0	0	0	0	0	0	0			lncRNA:CR45565	0	0	0	0	0	0
			fl(2)d	11.9204	0.211231	0.563835	0.437284	0.555235	0.565119	0.104481			CR44394	0	0	0	0	0	0	0			lncRNA:CR44904	0	0	0	0	0	0	0			asRNA:CR44046	0	0	0	0	0	0	0			CG31211	6.76134	0.448879	0.717164	0.877302	0.389494	0.18197
			Mhc	0	0	0	0	0	0	0			lncRNA:CR44397	0	0	0	0	0	0	0			lncRNA:CR44826	0	0	0	0	0	0	0			CG43083	0	0	0	0	0	0	0			lncRNA:CR45556	0	0	0	0	0	0
			CG13055	0.26699	1.05591	1.73212	0.437277	0.335355	0.0624704	0.510165			CG42590	0	0	0	0	0	0	0			lncRNA:CR44895	0	0	0	0	0	0	0			pre-mod(mdg4)-T	0	0	0	0	0	0	0			lncRNA:CR45484	0	0	0	0	0	0
			asRNA:CR44976	0	0	0	0	0	0	0			lncRNA:CR44414	0	0	0	0	0	0	0			lncRNA:CR44893	0	0	0	0	0	0	0			asRNA:CR44087	0	0	0	0	0	0	0			lncRNA:CR45513	0	0	0	0	0	0
			lncRNA:CR43941	0	0	0	0	0	0	0			lncRNA:CR44413	0	0	0	0	0	0	0			lncRNA:CR45298	0	0	0	0	0	0	0			CG43055	0	0	0	0	0	0	0			lncRNA:CR45570	0	0	0	0	0	0
			lncRNA:CR43853	0.00422733	0.000426933	0.220863	0.000120814	0.0624036	0	2.8619e-07			GlcAT-S	5.30831	0.22706	0.902844	0.305042	0.684507	0.561622	0.133817			lncRNA:CR44916	0	0	0	0	0	0	0			CG42779	0	0	0	0	0	0	0			UBL3	10.9487	0.379542	0.625884	0.802205	0.379244	0.323102
			lncRNA:CR43942	0	0	0	0	0	0	0			lncRNA:CR44412	0	0	0	0	0	0	0			lncRNA:CR44903	0	0	0	0	0	0	0			lncRNA:CR44233	0	0	0	0	0	0	0			lncRNA:CR44514	0.0973842	0.208271	0.990661	0.0758745	0.232331	0
			lncRNA:CR43945	0	0	0	0	0	0	0			CG11367	0.908761	0.354767	2.22927	0.201679	0.751622	0.436766	0.111347			mtgo	14.7215	0.315252	0.399319	0.857193	0.434336	0.950271	0.372204			lncRNA:CR44222	0	0	0	0	0	0	0			lncRNA:CR45462	0	0	0	0	0	0
			lncRNA:CR43642	0	0	0	0	0	0	0			DopEcR	30.4409	0.045914	0.683998	0.334236	0.529797	0.811081	-0.106294			lncRNA:CR44899	0	0	0	0	0	0	0			CG42778	0	0	0	0	0	0	0			lncRNA:CR45476	0	0	0	0	0	0
			CG43327	0	0	0	0	0	0	0			lncRNA:CR44398	0	0	0	0	0	0	0			lncRNA:CR44902	0	0	0	0	0	0	0			CheA56a	0	0	0	0	0	0	0			CHES-1-like	7.13094	0.438444	0.666026	0.689953	0.484686	0.262092
			CG43328	0	0	0	0	0	0	0			CG34286	0.018758	0.0998587	0.21972	0.0284052	0.0405926	0	0.0187168			lncRNA:CR44825	0	0	0	0	0	0	0			lncRNA:CR44056	0	0	0	0	0	0	0			asRNA:CR45481	0	0	0	0	0	0
			CG34212	0.0573759	0.24318	0.547233	0.0852021	0.12184	0	0.0448235			bin3	3.10217	0.630146	0.99213	0.595941	0.510363	0.499247	0.584302			lncRNA:CR44898	0	0	0	0	0	0	0			lncRNA:CR44061	0	0	0	0	0	0	0			pre-mod(mdg4)-I	0.00469324	0.040282	0.160628	0.011399	0.0364539	0
			asRNA:CR43948	0	0	0	0	0	0	0			asRNA:CR45999	0.00932241	-0.00146297	0.459096	-0.000267087	0.122333	0.124396	-2.30214e-05			asRNA:CR44897	0	0	0	0	0	0	0			pre-mod(mdg4)-AE	0	0	0	0	0	0	0			lncRNA:CR45478	0	0	0	0	0	0
			CG43703	0	0	0	0	0	0	0			lncRNA:CR44399	0	0	0	0	0	0	0			asRNA:CR44896	0	0	0	0	0	0	0			lncRNA:CR42767	0	0	0	0	0	0	0			CG46306	0	0	0	0	0	0
			lncRNA:CR44919	0	0	0	0	0	0	0			lncRNA:CR44400	0	0	0	0	0	0	0			lncRNA:CR44853	0	0	0	0	0	0	0			CG44044	0	0	0	0	0	0	0			lncRNA:CR45514	0	0	0	0	0	0
			lncRNA:CR43823	0	0	0	0	0	0	0			mEFTu1	7.68046	0.352674	0.718276	0.610124	0.430197	0.624046	0.238828			lncRNA:CR44824	0	0	0	0	0	0	0			lncRNA:CR44059	0	0	0	0	0	0	0			lncRNA:CR45554	0	0	0	0	0	0
			lncRNA:CR43357	0	0	0	0	0	0	0			asRNA:CR45889	0.0249293	0.0834387	0.917619	0.0229591	0.227616	0.124968	0.00565979			lncRNA:CR44855	0	0	0	0	0	0	0			lncRNA:CR44231	0	0	0	0	0	0	0			lncRNA:CR45461	0	0	0	0	0	0
			lncRNA:CR44920	0	0	0	0	0	0	0			bond	0	0	0	0	0	0	0			CG8389	1.62717	0.578818	1.5097	0.502212	0.546725	0.537558	0.295804			CG43110	0	0	0	0	0	0	0			lncRNA:CR44530	0.00469324	0.040282	0.160628	0.011399	0.0364539	0
			Dd	17.8893	0.162992	0.44683	0.584082	0.588618	0.738103	0.139084			His1:CG31617	0	0	0	0	0	0	0			lncRNA:CR44863	0	0	0	0	0	0	0			CG43108	0	0	0	0	0	0	0			CG8578	0.342163	0.951375	2.16552	0.389325	0.520654	0
			lncRNA:CR44921	0	0	0	0	0	0	0			CR34311	0.013863	0.106433	0.238559	0.0278843	0.0409681	0.0624816	0.0195234			lncRNA:CR44864	0	0	0	0	0	0	0			CG42766	0	0	0	0	0	0	0			lncRNA:CR45515	0	0	0	0	0	0
			lncRNA:CR44973	0	0	0	0	0	0	0			lncRNA:CR45918	0	0	0	0	0	0	0			lncRNA:CR44865	0	0	0	0	0	0	0			CG43056	0	0	0	0	0	0	0			CG46307	0	0	0	0	0	0
			CG43886	0	0	0	0	0	0	0			lncRNA:CR45938	0.0265761	-0.0262887	0.393244	-0.00161872	0.0827497	0.0624961	-0.00577367			CG6999	4.56002	0.59651	0.999025	0.51445	0.565121	0.691227	0.3855			CG43057	0	0	0	0	0	0	0			lncRNA:CR44523	0.00527888	0.0408635	0.160628	0.0115636	0.0363267	0
			CG43702	0	0	0	0	0	0	0			lncRNA:CR44409	0	0	0	0	0	0	0			lncRNA:CR44917	0	0	0	0	0	0	0			lncRNA:CR44060	0	0	0	0	0	0	0			lncRNA:CR45551	0	0	0	0	0	0
			lncRNA:CR43969	0	0	0	0	0	0	0			CG43351	0.013863	0.106433	0.238559	0.0278843	0.0409681	0.0624816	0.0195234			lncRNA:CR44919	0	0	0	0	0	0	0			asRNA:CR44045	0	0	0	0	0	0	0			syd	3.12358	0.608789	1.15155	0.681854	0.393706	0.126327
			lncRNA:CR43966	0	0	0	0	0	0	0			His-Psi:CR31615	0	0	0	0	0	0	0			tum	0.0351522	0.0838255	0.812315	0.0253242	0.210638	0.0768848	0.00402358			CG43112	0	0	0	0	0	0	0			mah	0.0050392	0.05127	0.160628	0.0145084	0.0340721	0
			asRNA:CR43865	0	0	0	0	0	0	0			lncRNA:CR44129	0.122274	-0.223405	0.198187	-0.117694	0.0652567	0	-0.278823			lncRNA:CR44918	0	0	0	0	0	0	0			CG43120	0	0	0	0	0	0	0			lncRNA:CR45460	0	0	0	0	0	0
			Wnk	3.664	0.689092	1.15504	0.787226	0.457377	0.185671	0.633192			RNaseMRP:RNA	0.230349	0.800254	1.56834	0.343935	0.328203	0.186822	0.346882			lncRNA:CR45599	0	0	0	0	0	0	0			lncRNA:CR44214	0	0	0	0	0	0	0			lncRNA:CR45659	0.032792	0.185019	0.774812	0.0570754	0.17375	0
			lncRNA:CR43884	0	0	0	0	0	0	0			Lnk	1.52513	0.657035	1.48489	0.524849	0.547332	0.499247	0.463368			pre-mod(mdg4)-J	0	0	0	0	0	0	0			CG44140	0	0	0	0	0	0	0			lncRNA:CR45555	0	0	0	0	0	0
			lncRNA:CR44924	0	0	0	0	0	0	0			UQCR-11	81.3206	0.106547	0.218494	0.479094	0.527975	0.935169	0.0785285			msps	3.26187	0.61907	0.991943	0.542135	0.542503	0.69187	0.385247			CG44139	0	0	0	0	0	0	0			Sema5c	0	0	0	0	0	0
			lncRNA:CR44909	0	0	0	0	0	0	0			lncRNA:CR42862	19.8577	0.306892	0.385841	0.877266	0.423636	0.859826	0.492308			lncRNA:CR44856	0	0	0	0	0	0	0			lncRNA:CR42868	0	0	0	0	0	0	0			sm	125.603	0.238362	0.246061	1.11014	0.350958	0.560731
			lncRNA:CR43984	0	0	0	0	0	0	0			CG6999	3.94368	0.657415	1.13022	0.536692	0.502467	0.561622	0.649644			pre-mod(mdg4)-P	0	0	0	0	0	0	0			CG43109	0	0	0	0	0	0	0			lncRNA:CR44519	0.00557512	0.040282	0.160628	0.011399	0.0364539	0
			asRNA:CR43898	0.00422733	0.000426933	0.220863	0.000120814	0.0624036	0	2.8619e-07			Uhg7	0.915983	0.845188	2.18069	0.432191	0.553344	0.436766	0.38181			promL	3.82147	0.570178	0.900785	0.593529	0.453659	0.768111	0.398169			lncRNA:CR44138	0	0	0	0	0	0	0			lncRNA:CR45459	0	0	0	0	0	0
			Su(var)3-9	0.514162	0.728436	2.104	0.266388	0.506145	0.0624704	0.28957			lbk	4.34862	0.124274	0.772349	0.215591	0.671174	0.74734	0.0190043			lncRNA:CR45572	0	0	0	0	0	0	0			lncRNA:CR44055	0	0	0	0	0	0	0			Chchd2	77.7545	0.158516	0.268342	0.581592	0.497577	0.757241
			Lgr4	0.267095	0.369781	0.806613	0.18463	0.219871	0	0.127056			lncRNA:CR44415	0	0	0	0	0	0	0			mEFTu1	8.36451	0.329703	0.661163	0.678474	0.392833	0.768056	0.256879			CG42876	0	0	0	0	0	0	0			ND-B22	76.4225	0.143811	0.256825	0.604164	0.531209	0.789639
			lncRNA:CR44925	0	0	0	0	0	0	0			msps	2.76421	0.558719	1.23348	0.490885	0.569187	0.562145	0.355905			RpL39	78.4743	0.212373	0.221197	0.844179	0.42198	0.978718	0.200103			CG43060	0	0	0	0	0	0	0			Zcchc7	2.46375	0.640249	1.19197	0.680744	0.485692	0.0450859
			CG43326	0	0	0	0	0	0	0			CG42728	0	0	0	0	0	0	0			asRNA:CR44866	0	0	0	0	0	0	0			CG42866	0	0	0	0	0	0	0			inaF-D	0.04437	0.325539	0.923138	0.100649	0.195791	0
			lncRNA:CR44917	0	0	0	0	0	0	0			CG31279	0.00585872	-0.0256364	0.220863	-0.00725459	0.0567246	0	-0.0010795			CG2924	6.66499	0.370594	0.600593	0.641068	0.529637	0.921406	0.220254			asRNA:CR44049	0	0	0	0	0	0	0			wg	0	0	0	0	0	0
			lncRNA:CR43892	0	0	0	0	0	0	0			Grip75	1.29234	0.553483	1.83219	0.379851	0.679879	0.436766	0.174694			lncRNA:CR44867	0	0	0	0	0	0	0			lncRNA:CR44050	0	0	0	0	0	0	0			cac	33.9796	0.265561	0.33674	0.889364	0.35743	0.636994
			lncRNA:CR43967	0	0	0	0	0	0	0			Alg1	1.31908	0.807572	1.64283	0.425139	0.448013	0.436766	0.417925			AGO3	0.0395738	0.155123	0.770762	0.0496571	0.19215	0.0769217	0.0219293			CG43058	0	0	0	0	0	0	0			fok	24.4998	0.34656	0.414422	0.857554	0.341887	0.612556
			lncRNA:CR44923	0	0	0	0	0	0	0			CG42726	0	0	0	0	0	0	0			CG44869	0	0	0	0	0	0	0			lncRNA:CR44120	0	0	0	0	0	0	0			lncRNA:CR45573	0	0	0	0	0	0
			RpL40	163.464	0.0983251	0.181427	0.805328	0.488073	0.827172	0.129702			Gpa2	0	0	0	0	0	0	0			lncRNA:CR44871	0	0	0	0	0	0	0			CG44141	0	0	0	0	0	0	0			lncRNA:CR45332	18.1033	0.570177	0.830071	0.824151	0.403176	0.513921
			CG12730	2.64816	0.351224	1.77329	0.329207	0.664999	0.185671	0.117886			CG44271	0	0	0	0	0	0	0			lncRNA:CR44870	0	0	0	0	0	0	0			lncRNA:CR43053	0	0	0	0	0	0	0			lncRNA:CR44583	0	0	0	0	0	0
			lncRNA:CR43888	0	0	0	0	0	0	0			alpha-Est5	0	0	0	0	0	0	0			asRNA:CR44873	0	0	0	0	0	0	0			CG43061	0	0	0	0	0	0	0			lncRNA:CR44554	0.00353319	0.0530535	0.172764	0.0139585	0.0344899	0
			lncRNA:CR44553	0	0	0	0	0	0	0			CG42727	0	0	0	0	0	0	0			lncRNA:CR44868	0	0	0	0	0	0	0			betaNACtes5	0	0	0	0	0	0	0			lncRNA:CR44582	0	0	0	0	0	0
			lncRNA:CR43970	0	0	0	0	0	0	0			CG42718	0	0	0	0	0	0	0			asRNA:CR44872	0	0	0	0	0	0	0			CG43059	0	0	0	0	0	0	0			tapas	6.90723	0.416025	0.745705	0.819511	0.464246	0.244732
			CG43447	0.00468077	-0.00521066	0.220863	-0.00147452	0.0613236	0	-4.29998e-05			Pgi	14.9317	0.376961	0.506418	0.633778	0.472031	0.898997	0.281926			pre-mod(mdg4)-K	0	0	0	0	0	0	0			lncRNA:CR44136	0	0	0	0	0	0	0			lncRNA:CR44542	0	0	0	0	0	0
			Trpm	3.19861	0.650182	1.32179	0.501581	0.472245	0.124414	0.377696			lncRNA:CR44334	0.0183117	-0.0303035	0.181557	-0.0104318	0.0542151	0	-0.00187152			pre-mod(mdg4)-C	0	0	0	0	0	0	0			CG43116	0	0	0	0	0	0	0			lncRNA:CR44537	0	0	0	0	0	0
			CG43325	0	0	0	0	0	0	0			CG42688	0	0	0	0	0	0	0			lncRNA:CR45938	0.0327091	-0.0323553	0.483992	-0.00199227	0.101846	0.0769183	-0.00710606			lncRNA:CR45978	0	0	0	0	0	0	0			lncRNA:CR44584	0	0	0	0	0	0
			CG43968	0	0	0	0	0	0	0			CG18258	0	0	0	0	0	0	0			pre-mod(mdg4)-E	0	0	0	0	0	0	0			asRNA:CR44052	0	0	0	0	0	0	0			lncRNA:CR44586	0	0	0	0	0	0
			CG45076	0	0	0	0	0	0	0			CG32727	0	0	0	0	0	0	0			lncRNA:CR44874	0	0	0	0	0	0	0			CG43106	0	0	0	0	0	0	0			lncRNA:CR46124	0.0240901	0.142161	0.45306	0.0456479	0.101664	0
			CG43965	0	0	0	0	0	0	0			CR42723	0	0	0	0	0	0	0			lncRNA:CR44875	0	0	0	0	0	0	0			tRNA:Phe-GAA-1-7	0	0	0	0	0	0	0			lncRNA:CR45572	0	0	0	0	0	0
			CG43336	0	0	0	0	0	0	0			CR42722	0	0	0	0	0	0	0			CG45207	0	0	0	0	0	0	0			lncRNA:CR44051	0	0	0	0	0	0	0			lncRNA:CR44588	0	0	0	0	0	0
			PIG-Z	0	0	0	0	0	0	0			CG17097	0	0	0	0	0	0	0			Shawl	4.42613	0.732906	0.940114	1.2602	0.335883	0.538037	2.27209			CR42786	0	0	0	0	0	0	0			lncRNA:CR44587	0	0	0	0	0	0
			CG45079	0	0	0	0	0	0	0			NFAT	8.19662	0.401124	0.589356	0.612638	0.36479	0.894731	0.327853			Slik	1.36946	0.652588	1.53758	0.427991	0.595955	0.537558	0.261854			lncRNA:CR43104	0	0	0	0	0	0	0			lncRNA:CR44942	0.0152607	0.0645937	0.316614	0.0186179	0.0761781	0
			CG43335	0	0	0	0	0	0	0			CR43275	0.0187294	0.0560078	0.168857	0.0207305	0.0462578	0	0.00731992			asRNA:CR45206	0	0	0	0	0	0	0			CG42782	0	0	0	0	0	0	0			lncRNA:CR44539	0	0	0	0	0	0
			lncRNA:CR43977	0	0	0	0	0	0	0			CG40813	0.034772	0.0582894	0.125771	0.028966	0.0401899	0	0.0111778			lncRNA:CR45204	0	0	0	0	0	0	0			CR43105	0	0	0	0	0	0	0			lncRNA:CR44579	0	0	0	0	0	0
			lncRNA:CR43983	0	0	0	0	0	0	0			asRNA:CR44368	0.0219129	-0.0659458	0.419153	-0.0213104	0.101223	0.0624961	-0.0134312			asRNA:CR45205	0	0	0	0	0	0	0			lncRNA:CR44213	0	0	0	0	0	0	0			lncRNA:CR44496	0.00310078	0.0381992	0.160459	0.010821	0.0369015	0
			lncRNA:CR43912	0	0	0	0	0	0	0			lncRNA:dntRL	0	0	0	0	0	0	0			lncRNA:CR45596	0	0	0	0	0	0	0			CR43100	0	0	0	0	0	0	0			lncRNA:CR44581	0	0	0	0	0	0
			CG43316	0	0	0	0	0	0	0			lncRNA:CR45906	0	0	0	0	0	0	0			lncRNA:CR45258	0	0	0	0	0	0	0			asRNA:CR44065	0	0	0	0	0	0	0			lncRNA:CR44540	0	0	0	0	0	0
			CG43880	0	0	0	0	0	0	0			CG31639	0	0	0	0	0	0	0			lncRNA:CR45593	0	0	0	0	0	0	0			CG43101	0	0	0	0	0	0	0			lncRNA:CR44580	0	0	0	0	0	0
			CR44906	0	0	0	0	0	0	0			CG31533	0.00432298	-0.0620769	0.220863	-0.0175665	0.0486663	0	-0.00674476			Nup214	0.349123	0.62857	2.43483	0.228908	0.652988	0.460673	0.118192			lncRNA:CR44068	0	0	0	0	0	0	0			lncRNA:CR44502	0	0	0	0	0	0
			CG45078	0	0	0	0	0	0	0			tRNA:Val-AAC-1-2	0	0	0	0	0	0	0			lncRNA:CR45594	0	0	0	0	0	0	0			CG42798	0	0	0	0	0	0	0			pico	16.95	0.322209	0.460651	0.993794	0.36515	0.51711
			CG43319	0	0	0	0	0	0	0			CG31601	0	0	0	0	0	0	0			Eip74EF	2.43304	0.52186	1.37621	0.49562	0.512966	0.690853	0.265892			CG42869	0	0	0	0	0	0	0			lncRNA:CR44578	0	0	0	0	0	0
			CG43321	0	0	0	0	0	0	0			lncRNA:CR45903	0	0	0	0	0	0	0			lncRNA:CR45592	0	0	0	0	0	0	0			lncRNA:CR44073	0	0	0	0	0	0	0			lncRNA:CR44563	0	0	0	0	0	0
			lncRNA:CR43962	0	0	0	0	0	0	0			lncRNA:CR43893	0.00537422	0.0251502	0.220863	0.00711702	0.0568337	0.0624989	0.00103805			lncRNA:CR45575	0	0	0	0	0	0	0			CG42870	0	0	0	0	0	0	0			lncRNA:CR44585	0	0	0	0	0	0
			lncRNA:CR43847	0	0	0	0	0	0	0			lncRNA:CR45915	0	0	0	0	0	0	0			lncRNA:CR45589	0	0	0	0	0	0	0			tRNA:Pro-TGG-1-3	0	0	0	0	0	0	0			lncRNA:CR44536	0	0	0	0	0	0
			fau	0	0	0	0	0	0	0			His2A:CG31618	0	0	0	0	0	0	0			lncRNA:CR45200	0	0	0	0	0	0	0			CG42852	0	0	0	0	0	0	0			CG46303	0	0	0	0	0	0
			asRNA:CR43908	0	0	0	0	0	0	0			lncRNA:CR44135	0.0111276	-0.152244	0.220863	-0.0430821	0.0306641	0	-0.0470813			lncRNA:CR45591	0	0	0	0	0	0	0			CG31326	0	0	0	0	0	0	0			pre-mod(mdg4)-E	0.00556242	0.0360606	0.160628	0.0102044	0.0373805	0
			CG44001	0	0	0	0	0	0	0			CG31642	0	0	0	0	0	0	0			lncRNA:CR45201	0	0	0	0	0	0	0			CG42851	0	0	0	0	0	0	0			CG46305	0	0	0	0	0	0
			dpr21	70.5152	0.0857439	0.284898	0.716547	0.413487	0.848511	0.0594768			asRNA:CR45909	0	0	0	0	0	0	0			lncRNA:CR45576	0	0	0	0	0	0	0			lncRNA:CR42850	0	0	0	0	0	0	0			lncRNA:CR44562	0	0	0	0	0	0
			elav	37.6958	0.128221	0.309485	0.659217	0.467184	0.812327	0.132926			tRNA:Arg-CCT-1-1	0	0	0	0	0	0	0			lncRNA:CR45220	0	0	0	0	0	0	0			asRNA:CR44144	0	0	0	0	0	0	0			asRNA:CR46194	0.0168607	0.0471873	0.481883	0.0133531	0.113493	0
			Gr39a	0	0	0	0	0	0	0			lncRNA:CR45904	0	0	0	0	0	0	0			lncRNA:CR45579	0	0	0	0	0	0	0			pre-mod(mdg4)-W	0	0	0	0	0	0	0			lncRNA:TS9	0.00353319	0.0530535	0.172764	0.0139585	0.0344899	0
			lncRNA:CR44903	0	0	0	0	0	0	0			His4:CG31611	0	0	0	0	0	0	0			lncRNA:CR45578	0	0	0	0	0	0	0			lncRNA:CR44202	0	0	0	0	0	0	0			CG44574	0	0	0	0	0	0
			lncRNA:CR43878	0	0	0	0	0	0	0			lncRNA:CR45905	0	0	0	0	0	0	0			inaF-D	0.0283545	0.0966438	0.515195	0.0299967	0.13029	0.0769183	0.0110618			asRNA:CR44201	0	0	0	0	0	0	0			lncRNA:CR44575	0	0	0	0	0	0
			lncRNA:CR44898	0	0	0	0	0	0	0			lncRNA:CR45920	0	0	0	0	0	0	0			lncRNA:CR45221	0	0	0	0	0	0	0			CG42854	0	0	0	0	0	0	0			asRNA:CR45139	0.142604	0.872581	2.28885	0.287963	0.462034	0
			asRNA:CR43979	0	0	0	0	0	0	0			Oatp26F	0	0	0	0	0	0	0			lncRNA:CR45581	0	0	0	0	0	0	0			pre-mod(mdg4)-V	0	0	0	0	0	0	0			lncRNA:CR44543	0	0	0	0	0	0
			lncRNA:CR43848	0	0	0	0	0	0	0			lncRNA:CR45917	0	0	0	0	0	0	0			ssx	5.61547	0.44855	0.740046	0.554511	0.526257	0.844881	0.266725			lncRNA:CR43097	0	0	0	0	0	0	0			lncRNA:CR44854	0.00515917	0.0408635	0.160628	0.0115636	0.0363267	0
			lncRNA:CR43988	0	0	0	0	0	0	0			clu	1.87659	0.521335	1.30515	0.403998	0.58668	0.499265	0.237044			lncRNA:CR45583	0	0	0	0	0	0	0			asRNA:CR44160	0	0	0	0	0	0	0			lncRNA:CR44545	0	0	0	0	0	0
			asRNA:CR44968	0.00469791	0.0368433	0.220863	0.0104259	0.0542197	0	0.00227406			tRNA:Asp-GTC-1-4	0	0	0	0	0	0	0			lncRNA:CR45580	0	0	0	0	0	0	0			asRNA:CR44071	0	0	0	0	0	0	0			lncRNA:CR44573	0	0	0	0	0	0
			CG43982	0	0	0	0	0	0	0			tRNA:Asp-GTC-1-6	0	0	0	0	0	0	0			lncRNA:CR45261	0	0	0	0	0	0	0			Adgf-C	3.55149	1.00812	0.542652	0.970678	0.286093	0.324661	2.13644			lncRNA:CR44546	0	0	0	0	0	0
			lncRNA:CR43879	0	0	0	0	0	0	0			His3:CG31613	0	0	0	0	0	0	0			lncRNA:CR45584	0	0	0	0	0	0	0			CG44163	0	0	0	0	0	0	0			lncRNA:CR44833	0.0071942	0.0773153	0.160469	0.0219004	0.0286337	0
			asRNA:CR44896	0	0	0	0	0	0	0			His-Psi:CR31614	0	0	0	0	0	0	0			asRNA:CR46029	0.0498005	-0.059833	0.72645	-0.0414268	0.151221	0.0769183	-0.0701314			CG44142	0	0	0	0	0	0	0			lncRNA:CR44576	0	0	0	0	0	0
			CG44000	0	0	0	0	0	0	0			tRNA:Asp-GTC-1-5	0	0	0	0	0	0	0			lncRNA:CR45216	0	0	0	0	0	0	0			lncRNA:CR44161	0	0	0	0	0	0	0			lncRNA:CR44572	0	0	0	0	0	0
			lncRNA:CR43356	0	0	0	0	0	0	0			CG31606	0	0	0	0	0	0	0			lncRNA:CR45588	0	0	0	0	0	0	0			FDY	0	0	0	0	0	0	0			lncRNA:CR44577	0	0	0	0	0	0
			CG43355	0	0	0	0	0	0	0			B9d2	0	0	0	0	0	0	0			mfr	0	0	0	0	0	0	0			asRNA:CR44165	0	0	0	0	0	0	0			lncRNA:CR44516	0	0	0	0	0	0
			lncRNA:CR43929	0	0	0	0	0	0	0			CG11523	3.68386	0.180024	0.917055	0.208051	0.657334	0.561667	0.0747308			lncRNA:CR45224	0	0	0	0	0	0	0			lncRNA:CR44070	0	0	0	0	0	0	0			puf	1.5929	0.753301	1.65462	0.505605	0.502548	0.0450859
			asRNA:CR44897	0	0	0	0	0	0	0			Su(dx)	0.92018	0.501137	1.86838	0.317732	0.683622	0.436766	0.2766			lncRNA:CR45222	0	0	0	0	0	0	0			lncRNA:CR44143	0	0	0	0	0	0	0			lncRNA:CR44513	0	0	0	0	0	0
			lncRNA:CR43639	0	0	0	0	0	0	0			lncRNA:CR44845	0.0174982	0.0194152	0.440814	0.00550563	0.120609	0.0624961	0.000322524			lncRNA:CR45587	0	0	0	0	0	0	0			CG43098	0	0	0	0	0	0	0			lncRNA:CR44711	0	0	0	0	0	0
			lncRNA:CRG	0	0	0	0	0	0	0			CG44270	0	0	0	0	0	0	0			asRNA:CR45209	0	0	0	0	0	0	0			asRNA:CR44069	0	0	0	0	0	0	0			asRNA:CR46020	0.00712061	0.0417011	0.160378	0.0118189	0.0361296	0
			CG45063	0	0	0	0	0	0	0			CG42729	0	0	0	0	0	0	0			asRNA:CR45260	0	0	0	0	0	0	0			lncRNA:CR44183	0	0	0	0	0	0	0			mRpL34	11.1986	0.331397	0.557128	0.756916	0.458476	0.371474
			lncRNA:CR43985	0	0	0	0	0	0	0			CG43897	0.0067861	0.0162869	0.220863	0.00460887	0.058826	0	0.000428521			lncRNA:CR45586	0	0	0	0	0	0	0			lncRNA:CR44164	0	0	0	0	0	0	0			lncRNA:CR44547	0	0	0	0	0	0
			lncRNA:CR43987	0	0	0	0	0	0	0			Task6	4.96189	0.0739757	0.804915	0.436166	0.434515	0.686466	0.0865604			CG34155	2.65175	0.467817	2.10454	0.492933	0.531345	0.491991	0.446904			lncRNA:CR44184	0	0	0	0	0	0	0			side-IV	4.53809	0.457692	0.969165	0.608788	0.522691	0.173642
			lncRNA:CR44899	0	0	0	0	0	0	0			cnc	2.94498	0.591969	1.27459	0.426011	0.609267	0.559211	0.302417			lncRNA:CR45228	0	0	0	0	0	0	0			lncRNA:CR42844	0	0	0	0	0	0	0			Prestin	2.16152	0.670284	1.35823	0.547112	0.508306	0.0450859
			lncRNA:CR43913	0	0	0	0	0	0	0			lncRNA:CR45825	0.10223	-0.0508176	0.892755	-0.0323556	0.243364	0.124995	-0.0667252			Lrch	2.00798	0.551391	1.30094	0.49173	0.582558	0.614457	0.286508			asRNA:CR45124	0.0631798	0.20185	1.07525	0.0625749	0.283698	0	0.0141342			lncRNA:CR44518	0	0	0	0	0	0
			CG45064	0	0	0	0	0	0	0			cer	2.42933	0.472785	1.23816	0.420672	0.647736	0.499247	0.201557			asRNA:CR45214	0	0	0	0	0	0	0			CG31245	0	0	0	0	0	0	0			Psc	4.37976	0.497696	0.98035	0.7152	0.443862	0.102366
			CG43376	0.0297224	0.17045	0.643291	0.050498	0.14602	0	0.0296564			asRNA:CR45927	0.0206562	-0.0155196	0.431688	-0.00473955	0.115707	0.0624961	-0.00108914			Su(Ste):CR42418	0.0310897	0.144282	0.83588	0.040976	0.199006	0.0769004	0.0234876			alpha-Man-Ic	0	0	0	0	0	0	0			CG3918	3.38268	0.517101	0.99162	0.636502	0.490901	0.121744
			lncRNA:CR43949	0	0	0	0	0	0	0			CG43349	0.00610112	0.0122235	0.220387	0.00346647	0.0597356	0.0624961	0.000240154			lncRNA:CR45585	0	0	0	0	0	0	0			ppk31	0	0	0	0	0	0	0			lncRNA:TS1	0	0	0	0	0	0
			CG43980	0	0	0	0	0	0	0			CG44094	0.0121226	-0.115803	0.220863	-0.0327701	0.0375034	0	-0.0256862			CR45227	0	0	0	0	0	0	0			lncRNA:CR46077	0	0	0	0	0	0	0			lncRNA:CR44531	0	0	0	0	0	0
			lncRNA:CR43927	0	0	0	0	0	0	0			lncRNA:CR44350	0.00505582	-0.0728117	0.220729	-0.0206168	0.0463437	0	-0.00945747			jdp	137.174	0.313101	0.897459	1.05894	0.329315	0.760735	0.462937			CG46059	0	0	0	0	0	0	0			lncRNA:CR44571	0	0	0	0	0	0
			lncRNA:CR43960	0	0	0	0	0	0	0			gce	10.8886	0.221828	0.50392	0.449344	0.554789	0.92179	0.104932			lncRNA:CR45212	0	0	0	0	0	0	0			lncRNA:CR46063	0	0	0	0	0	0	0			SP2353	6.60911	0.36433	0.867692	0.738093	0.412124	0.154803
			asRNA:CR43926	0	0	0	0	0	0	0			CG34330	0.0200251	0.00524835	0.220863	0.00148518	0.0613151	0	4.3627e-05			Uhg7	0.908512	0.834473	2.20839	0.407999	0.557557	0.537558	0.361844			asRNA:CR46054	0	0	0	0	0	0	0			lncRNA:CR44511	0	0	0	0	0	0
			CG43924	0	0	0	0	0	0	0			lncRNA:CR44888	0	0	0	0	0	0	0			lncRNA:CR45199	0	0	0	0	0	0	0			asRNA:CR46065	0	0	0	0	0	0	0			CG32500	0	0	0	0	0	0
			CG43922	0	0	0	0	0	0	0			Eip74EF	2.85435	0.501638	1.33983	0.39707	0.504457	0.561318	0.238033			lncRNA:CR45215	0	0	0	0	0	0	0			asRNA:CR46058	0	0	0	0	0	0	0			lncRNA:CR44548	0	0	0	0	0	0
			lncRNA:CR43858	0	0	0	0	0	0	0			IRSp53	0.212335	0.191379	1.35939	0.0566147	0.31946	0.186895	-0.0394718			HIP	1.28951	0.371225	1.68418	0.181872	0.565114	0.537558	0.0324381			asRNA:CR46066	0	0	0	0	0	0	0			CG44569	0	0	0	0	0	0
			CG43920	0	0	0	0	0	0	0			Npc1b	0	0	0	0	0	0	0			asRNA:CR45213	0	0	0	0	0	0	0			CG31106	0	0	0	0	0	0	0			Opa1	19.4005	0.283454	0.417906	0.796506	0.457934	0.667874
			lncRNA:CR43353	0	0	0	0	0	0	0			Sap47	156.721	-0.212588	0.273989	0.406376	0.402551	0.910728	-0.585737			Pgi	13.1038	0.4074	0.51917	0.650296	0.451977	0.921729	0.322561			ppk22	0	0	0	0	0	0	0			lncRNA:CR44505	0	0	0	0	0	0
			CG43350	0	0	0	0	0	0	0			Irbp	0.521706	0.48839	2.35154	0.198217	0.640738	0.312372	0.0313101			lncRNA:CR45573	0	0	0	0	0	0	0			CG31459	0	0	0	0	0	0	0			lncRNA:CR44487	0	0	0	0	0	0
			CG43919	0	0	0	0	0	0	0			lncRNA:CR44377	0.00700126	-0.0822326	0.220863	-0.0232702	0.0443532	0.0624961	-0.0122489			Rtca	1.37915	0.74302	1.64612	0.495221	0.57157	0.537558	0.402322			CG31463	0	0	0	0	0	0	0			lncRNA:CR44529	0	0	0	0	0	0
			lncRNA:CR43928	0	0	0	0	0	0	0			CG34169	0.00537422	0.0251502	0.220863	0.00711702	0.0568337	0.0624989	0.00103805			CG42534	0.0239377	0.146038	0.564857	0.0385855	0.123943	0.153819	0.0243244			otk2	0	0	0	0	0	0	0			lncRNA:CR44522	0	0	0	0	0	0
			side-II	24.6629	0.606762	0.653138	0.842231	0.398034	0.61476	0.500973			CG31454	0.0118879	-0.0369267	0.441726	-0.0104495	0.1055	0.0624989	-0.0057067			asRNA:CR45210	0	0	0	0	0	0	0			CG31493	0	0	0	0	0	0	0			lncRNA:CR44484	0	0	0	0	0	0
			CG43998	0	0	0	0	0	0	0			CG31064	4.57947	0.419204	0.988005	0.462452	0.473542	0.686466	0.252628			CG12541	2.59314	0.600536	1.23416	0.520406	0.395027	0.537625	0.526312			lncRNA:CR45984	0	0	0	0	0	0	0			asRNA:CR46050	0.0048639	0.0408635	0.160628	0.0115636	0.0363267	0
			lncRNA:CR43855	0	0	0	0	0	0	0			CG34305	0.00314782	0.0054276	0.220538	0.00153817	0.0612728	0.0624961	4.67425e-05			SP2353	3.54077	0.476533	1.2204	0.69893	0.396233	0.691227	0.468826			tRNA:Thr-AGT-1-4	0	0	0	0	0	0	0			lncRNA:CR44486	0	0	0	0	0	0
			lncRNA:CR43917	0	0	0	0	0	0	0			CG34382	0	0	0	0	0	0	0			lncRNA:CR45598	0	0	0	0	0	0	0			lncRNA:CR45985	0	0	0	0	0	0	0			PlexB	11.721	0.330036	0.519066	0.648329	0.486101	0.556647
			lncRNA:CR43854	0	0	0	0	0	0	0			lncRNA:CR40719	0.0056401	0.0503317	0.220863	0.0142429	0.0512334	0	0.00434498			mt:ND3	4.88119	0.447606	0.817049	0.537027	0.478431	0.691227	0.258472			CG31296	0	0	0	0	0	0	0			lncRNA:CR44485	0	0	0	0	0	0
			smg	4.79401	0.279717	0.917086	0.376287	0.597162	0.185671	0.101807			Gfat2	2.86473	0.805671	1.15061	0.548113	0.443345	0.561622	0.818199			lncRNA:CR45965	0.0128848	-0.0113885	0.271832	-0.00322271	0.0743525	0	-0.000168107			tRNA:Gly-TCC-1-1	0	0	0	0	0	0	0			lncRNA:CR44520	0	0	0	0	0	0
			lncRNA:CR43852	0	0	0	0	0	0	0			Sh	70.0787	-0.48164	0.593248	0.579909	0.342141	0.831522	-0.66666			ddbt	0.00457244	-0.0113885	0.271832	-0.00322271	0.0743525	0	-0.000168107			lncRNA:CR46015	0	0	0	0	0	0	0			lncRNA:CR44483	0	0	0	0	0	0
			lncRNA:CR43930	0	0	0	0	0	0	0			CR41423	0	0	0	0	0	0	0			loaf	14.8887	0.380869	0.467739	0.785915	0.401072	0.893215	0.480696			asRNA:CR46005	0	0	0	0	0	0	0			lncRNA:CR44570	0	0	0	0	0	0
			CG43851	0	0	0	0	0	0	0			lncRNA:CR45914	0	0	0	0	0	0	0			CG13984	0.0233039	0.0427506	0.879325	0.0112626	0.22179	0.153785	0.00103889			CG31496	0	0	0	0	0	0	0			lncRNA:CR44503	0	0	0	0	0	0
			CG43354	0	0	0	0	0	0	0			CG43308	0	0	0	0	0	0	0			Fs(2)Ket	6.19019	0.481462	0.679887	0.575737	0.583562	0.844881	0.369028			pb	0	0	0	0	0	0	0			tbc	14.5261	0.437497	0.512412	0.98494	0.335646	0.408491
			CG43349	0	0	0	0	0	0	0			lncRNA:CR44895	0	0	0	0	0	0	0			asRNA:CR45629	0	0	0	0	0	0	0			lncRNA:CR46060	0	0	0	0	0	0	0			lncRNA:CR44482	0	0	0	0	0	0
			lncRNA:CR43862	0	0	0	0	0	0	0			lncRNA:CR43280	0	0	0	0	0	0	0			RhoGAP93B	12.5249	0.261917	0.436203	0.595219	0.488183	0.998254	0.198136			lncRNA:CR46061	0	0	0	0	0	0	0			lncRNA:CR44785	0.0366529	0.105039	0.573767	0.0315678	0.156828	0
			lncRNA:CR43874	0	0	0	0	0	0	0			CR43310	0	0	0	0	0	0	0			RhoGAPp190	10.6929	0.286448	0.530197	0.50132	0.564153	0.921729	0.134204			CG31321	0	0	0	0	0	0	0			CG44532	0	0	0	0	0	0
			lncRNA:CR44926	0	0	0	0	0	0	0			CG34342	0.00635808	0.0172099	0.25503	0.00421762	0.0591374	0.0624689	0.000413346			Lcch3	10.4254	0.253968	0.504125	0.56987	0.404987	0.921729	0.140942			lncRNA:CR45982	0	0	0	0	0	0	0			lncRNA:CR44550	0	0	0	0	0	0
			asRNA:CR43842	0	0	0	0	0	0	0			muc	13.1246	0.407646	0.567086	0.599881	0.458507	0.878209	0.347389			cnc	2.11655	0.650321	1.40407	0.440346	0.629038	0.615041	0.332951			CG31294	0	0	0	0	0	0	0			lncRNA:CR44527	0	0	0	0	0	0
			lncRNA:CR43918	0	0	0	0	0	0	0			CG43895	0	0	0	0	0	0	0			Socs44A	2.94761	0.421672	1.03226	0.43489	0.571502	0.614457	0.204591			CR31292	0	0	0	0	0	0	0			lncRNA:CR44491	0	0	0	0	0	0
			CG43841	0	0	0	0	0	0	0			CG10809	2.147	0.619193	1.25976	0.393173	0.58585	0.56167	0.277845			CG34355	18.35	0.596597	0.573164	0.904137	0.362473	0.736828	0.874705			CG31099	0	0	0	0	0	0	0			lncRNA:CR46016	0.00556242	0.0360606	0.160628	0.0102044	0.0373805	0
			lncRNA:CR43705	0	0	0	0	0	0	0			ssx	4.90303	0.369783	0.855103	0.450955	0.516171	0.686466	0.203079			CG42266	0.0184104	0.0819921	0.543663	0.0232022	0.135458	0	0.00587507			pre-mod(mdg4)-G	0	0	0	0	0	0	0			lncRNA:CR44535	0	0	0	0	0	0
			lncRNA:CR44933	0	0	0	0	0	0	0			CG43074	0.00494707	-0.0175565	0.220863	-0.00496814	0.0585402	0	-0.000499061			lncRNA:CR45665	0	0	0	0	0	0	0			lncRNA:CR46062	0	0	0	0	0	0	0			lncRNA:CR44481	0	0	0	0	0	0
			CG13917	69.0679	0.117271	0.234808	0.760273	0.509208	0.840695	0.1408			CG34206	0.00314782	0.0054276	0.220538	0.00153817	0.0612728	0.0624961	4.67425e-05			lncRNA:CR45256	0	0	0	0	0	0	0			pre-mod(mdg4)-H	0	0	0	0	0	0	0			lncRNA:CR44551	0	0	0	0	0	0
			asRNA:CR43866	0	0	0	0	0	0	0			CG32055	0.0127712	0.0410786	0.441726	0.0116244	0.111645	0	0.00420839			lncRNA:CR46036	0.0142169	-0.0930275	0.271585	-0.0263489	0.0563037	0	-0.0126071			Ir94c	0	0	0	0	0	0	0			lncRNA:CR44526	0	0	0	0	0	0
			lncRNA:CR44934	0	0	0	0	0	0	0			lncRNA:CR43282	0	0	0	0	0	0	0			IP3K2	0.0223307	-0.0413073	0.208484	-0.0152409	0.0648417	0.0769183	-0.0030651			asRNA:CR46068	0	0	0	0	0	0	0			lncRNA:CR46075	0.0206786	0.119539	0.461545	0.0367663	0.107843	0
			lncRNA:CR43846	0	0	0	0	0	0	0			lncRNA:CR45819	0.031365	0.0740019	0.693323	0.0180108	0.161243	0.0624689	0.0104996			Frq1	43.854	0.334897	0.330091	0.915244	0.405212	0.845093	1.24791			tRNA:Gly-TCC-1-2	0	0	0	0	0	0	0			lncRNA:CR44534	0	0	0	0	0	0
			CG43895	0	0	0	0	0	0	0			CG43886	0	0	0	0	0	0	0			lncRNA:CR45251	0.00643408	0.0200454	0.271832	0.00567245	0.0724012	0	0.00052741			lncRNA:CR45941	0	0	0	0	0	0	0			lncRNA:CR44501	0	0	0	0	0	0
			lncRNA:CR43863	0	0	0	0	0	0	0			lncRNA:CR44889	0	0	0	0	0	0	0			lncRNA:CR45670	0	0	0	0	0	0	0			CG31418	0	0	0	0	0	0	0			lncRNA:CR44524	0	0	0	0	0	0
			CG43894	0	0	0	0	0	0	0			a6	0.998107	0.271438	1.67746	0.177413	0.562542	0.436766	-0.0559438			lncRNA:CR45671	0	0	0	0	0	0	0			CG31419	0	0	0	0	0	0	0			lncRNA:CR44497	0	0	0	0	0	0
			lncRNA:CR44927	0	0	0	0	0	0	0			lncRNA:CR44893	0	0	0	0	0	0	0			lncRNA:CR45667	0	0	0	0	0	0	0			CG31482	0	0	0	0	0	0	0			lncRNA:CR44489	0	0	0	0	0	0
			lncRNA:CR43835	0	0	0	0	0	0	0			CG34175	0.00522769	0.0162869	0.220863	0.00460887	0.058826	0	0.000428521			lncRNA:CR45664	0	0	0	0	0	0	0			CR45932	0	0	0	0	0	0	0			lncRNA:CR44488	0	0	0	0	0	0
			lncRNA:CR43950	0	0	0	0	0	0	0			CG41284	0	0	0	0	0	0	0			asRNA:CR45663	0	0	0	0	0	0	0			CR45933	0	0	0	0	0	0	0			RpS21	72.3151	0.10594	0.241941	0.509669	0.576733	0.782829
			asRNA:CR43868	0	0	0	0	0	0	0			p23	14.859	0.254977	0.444561	0.50518	0.585435	0.985578	0.183163			lncRNA:CR45666	0	0	0	0	0	0	0			lncRNA:CR45981	0	0	0	0	0	0	0			lncRNA:CR44480	0	0	0	0	0	0
			CG43931	0	0	0	0	0	0	0			lncRNA:CR43302	0	0	0	0	0	0	0			CG5645	0.375451	0.72282	1.97134	0.351026	0.473469	0.230003	0.262502			tRNA:Lys-CTT-2-1Psi	0	0	0	0	0	0	0			lncRNA:TS2	0	0	0	0	0	0
			lncRNA:CR44929	0	0	0	0	0	0	0			lncRNA:CR44825	0	0	0	0	0	0	0			lncRNA:CR45631	0	0	0	0	0	0	0			CR45931	0	0	0	0	0	0	0			lncRNA:CR44885	0	0	0	0	0	0
			lncRNA:CR43840	0	0	0	0	0	0	0			rdgC	5.72297	0.0832121	1.15844	0.434886	0.463211	0.686485	0.127393			lncRNA:CR45672	0	0	0	0	0	0	0			CG31286	0	0	0	0	0	0	0			lncRNA:CR44490	0	0	0	0	0	0
			CG45065	0	0	0	0	0	0	0			CG43249	0	0	0	0	0	0	0			lncRNA:CR45662	0	0	0	0	0	0	0			tRNA:Gly-TCC-1-4	0	0	0	0	0	0	0			lncRNA:CR44549	0	0	0	0	0	0
			Tsen54	0.551619	0.704394	1.73706	0.359148	0.473789	0.186226	0.319024			CG34337	0.0108578	0.0157962	0.20911	0.00472126	0.0587366	0	0.000426046			cer	1.98358	0.458014	1.29078	0.400271	0.668813	0.614457	0.19268			lncRNA:CR46002	0	0	0	0	0	0	0			CG44477	0	0	0	0	0	0
			CG43346	0	0	0	0	0	0	0			Gyc76C	0.00537422	0.0251502	0.220863	0.00711702	0.0568337	0.0624989	0.00103805			lncRNA:CR45675	0	0	0	0	0	0	0			pre-mod(mdg4)-AA	0	0	0	0	0	0	0			lncRNA:CR44712	0	0	0	0	0	0
			CG43345	0	0	0	0	0	0	0			lncRNA:CR44824	0	0	0	0	0	0	0			CG45676	0	0	0	0	0	0	0			CG31086	0	0	0	0	0	0	0			lncRNA:CR44479	0	0	0	0	0	0
			lncRNA:CR44928	0	0	0	0	0	0	0			CG43251	0	0	0	0	0	0	0			lncRNA:CR45677	0	0	0	0	0	0	0			Ir94b	0	0	0	0	0	0	0			lncRNA:CR44561	0	0	0	0	0	0
			lncRNA:CR43826	0	0	0	0	0	0	0			lncRNA:CR44857	0	0	0	0	0	0	0			crq	2.95816	0.525186	1.03412	0.423825	0.536758	0.614457	0.295954			asRNA:CR45955	0	0	0	0	0	0	0			lncRNA:CR30055	8.35089	0.35329	0.558979	0.616937	0.433227	0.449582
			CG12355	11.3775	0.353507	0.797379	0.364789	0.586295	0.446248	0.181383			lncRNA:CR44823	0	0	0	0	0	0	0			lncRNA:CR46024	0.00597145	-0.0490281	0.271832	-0.013874	0.065913	0	-0.00328909			lncRNA:CR46056	0	0	0	0	0	0	0			dtn	11.117	0.445751	0.668885	0.716325	0.475703	0.408945
			Dop1R2	8.66803	0.433811	1.02909	0.628768	0.453617	0.191505	0.448475			lncRNA:CR43888	0	0	0	0	0	0	0			lncRNA:CR45678	0	0	0	0	0	0	0			lncRNA:CR46073	0	0	0	0	0	0	0			lncRNA:CR44560	0	0	0	0	0	0
			CG43829	0	0	0	0	0	0	0			CG42716	0	0	0	0	0	0	0			lncRNA:CR44708	0.0271836	0.149831	0.815495	0.0423992	0.192406	0	0.0196451			lncRNA:CR46057	0	0	0	0	0	0	0			hth	87.9073	0.254392	0.339832	0.755081	0.426169	0.629645
			lncRNA:CR44930	0	0	0	0	0	0	0			Tgs1	0	0	0	0	0	0	0			asRNA:CR45686	0	0	0	0	0	0	0			asRNA:CR31084	0	0	0	0	0	0	0			lncRNA:CR45575	0	0	0	0	0	0
			lncRNA:CR44912	0	0	0	0	0	0	0			CG43315	0	0	0	0	0	0	0			Ank	7.10914	0.300582	0.597792	0.473201	0.523161	0.921729	0.134575			TwdlH	0	0	0	0	0	0	0			Oct-TyrR	6.11413	0.546653	1.02602	0.680385	0.467712	0.276734
			asRNA:CR43833	0	0	0	0	0	0	0			CG43307	0	0	0	0	0	0	0			CG33342	0.0175377	0.0818075	0.243806	0.025811	0.0567089	0	0.0108318			CG31088	0	0	0	0	0	0	0			lncRNA:CR44904	0.0202922	0.0265453	0.320641	0.00733354	0.0850661	0
			lncRNA:CR43839	0	0	0	0	0	0	0			CG43880	0	0	0	0	0	0	0			lncRNA:CR45454	0.0301919	0.0292529	0.178064	0.0126372	0.0668852	0.0769183	0.00177642			CG31087	0	0	0	0	0	0	0			lncRNA:CR44888	0	0	0	0	0	0
			euc	0.579025	0.651327	1.66134	0.265288	0.36986	0.0624704	0.114119			lncRNA:CR44885	0	0	0	0	0	0	0			lncRNA:CR45680	0	0	0	0	0	0	0			asRNA:CR46069	0	0	0	0	0	0	0			lncRNA:CR44864	0	0	0	0	0	0
			lncRNA:CR43831	0	0	0	0	0	0	0			asRNA:CR44891	0	0	0	0	0	0	0			asRNA:CR45257	0	0	0	0	0	0	0			lncRNA:CR45953	0	0	0	0	0	0	0			lncRNA:CRG	0	0	0	0	0	0
			lncRNA:CR43832	0	0	0	0	0	0	0			lncRNA:CR43306	0	0	0	0	0	0	0			CG31064	5.40767	0.344777	0.797084	0.449794	0.529522	0.844881	0.138211			CG31528	0	0	0	0	0	0	0			CG46338	0	0	0	0	0	0
			lncRNA:CR43932	0	0	0	0	0	0	0			lncRNA:CR43882	0	0	0	0	0	0	0			NPF	0.543584	1.09259	1.86871	0.352519	0.374055	0.460657	0.557553			lncRNA:CR31526	0	0	0	0	0	0	0			lncRNA:CR44889	0	0	0	0	0	0
			CG43339	0	0	0	0	0	0	0			lncRNA:CR43314	0	0	0	0	0	0	0			lncRNA:CR45681	0	0	0	0	0	0	0			CG31206	0	0	0	0	0	0	0			CG14669	5.59726	0.306291	0.823981	0.601948	0.499338	0.215212
			lncRNA:CR43952	0	0	0	0	0	0	0			lncRNA:CR43263	0	0	0	0	0	0	0			asRNA:CR45682	0	0	0	0	0	0	0			Aasdh	0.218904	0.765235	1.67151	0.312789	0.428161	0	0.163			Tgs1	0	0	0	0	0	0
			lncRNA:CR44888	0	0	0	0	0	0	0			CG43248	0	0	0	0	0	0	0			CG43293	0.038847	0.1304	1.07888	0.0413749	0.275203	0.153803	0.0133706			lncRNA:CR45942	0	0	0	0	0	0	0			lncRNA:CR45939	0.00559088	0.0243116	0.160628	0.0068797	0.0399862	0
			lncRNA:CR43953	0	0	0	0	0	0	0			lncRNA:CR43285	0	0	0	0	0	0	0			lncRNA:CR45685	0	0	0	0	0	0	0			asRNA:CR46074	0	0	0	0	0	0	0			asRNA:CR44873	0	0	0	0	0	0
			asRNA:CR43877	0	0	0	0	0	0	0			lncRNA:CR43879	0	0	0	0	0	0	0			CG9067	2.89998	0.606429	0.992851	0.485678	0.514693	0.691227	0.596199			TwdlR	0	0	0	0	0	0	0			lncRNA:CR44874	0	0	0	0	0	0
			jvl	9.76408	0.427277	0.634499	0.8291	0.374755	0.296768	0.409359			lncRNA:CR44357	0.0111276	-0.152244	0.220863	-0.0430821	0.0306641	0	-0.0470813			Pka-R2	31.7885	0.261894	0.533305	0.750459	0.419272	0.772154	0.262265			lncRNA:CR46014	0	0	0	0	0	0	0			CG44476	0	0	0	0	0	0
			lncRNA:CR43994	0	0	0	0	0	0	0			CG43319	0	0	0	0	0	0	0			lncRNA:CR45688	0	0	0	0	0	0	0			CR31427	0	0	0	0	0	0	0			sisRNA:1	0	0	0	0	0	0
			CG43896	0	0	0	0	0	0	0			lncRNA:CR43247	0	0	0	0	0	0	0			Antp	0.112653	0.187302	0.223832	0.0643691	0.0309774	0.0769159	0.0739866			CG31077	0	0	0	0	0	0	0			lncRNA:CR45522	0.00337121	0.0620944	0.160333	0.0176039	0.0317521	0
			CG43954	0	0	0	0	0	0	0			CG43254	0	0	0	0	0	0	0			tai	17.4349	0.218682	0.372309	0.619011	0.459516	0.998827	0.14876			asRNA:CR46071	0	0	0	0	0	0	0			lncRNA:CR44863	0	0	0	0	0	0
			nmo	83.971	0.1184	0.228982	0.612182	0.516841	0.838439	0.0884486			lncRNA:CR43253	0	0	0	0	0	0	0			CG31140	21.8272	0.181635	0.358169	0.591495	0.469331	0.998254	0.101017			CR46072	0	0	0	0	0	0	0			pre-mod(mdg4)-J	0	0	0	0	0	0
			tou	12.2994	0.118772	0.618745	0.47343	0.442246	0.5689	0.0350895			sds22	2.62069	0.598733	1.15057	0.480517	0.551979	0.561622	0.501664			CG5793	1.32447	0.639152	2.19881	0.308031	0.651545	0.537558	0.186194			lncRNA:CR45950	0	0	0	0	0	0	0			asRNA:CR44872	0	0	0	0	0	0
			lncRNA:CR44723	0	0	0	0	0	0	0			CG34450	0.00746329	0.0162869	0.220863	0.00460887	0.058826	0	0.000428521			EMC3	4.18483	0.458022	0.89336	0.439594	0.557985	0.691227	0.227765			CG31089	0	0	0	0	0	0	0			pre-mod(mdg4)-C	0	0	0	0	0	0
			dpr7	64.8517	0.127035	0.243925	0.610793	0.548319	0.866781	0.11676			lncRNA:CR43874	0	0	0	0	0	0	0			p23	15.7147	0.25556	0.413239	0.541102	0.547542	0.998254	0.195466			CG31076	0	0	0	0	0	0	0			CG44153	8.08222	0.616562	1.05668	0.980499	0.39812	0.226945
			asRNA:CR43876	0	0	0	0	0	0	0			CG43318	0	0	0	0	0	0	0			lncRNA:CR45255	0	0	0	0	0	0	0			tRNA:Asn-GTT-1-10	0	0	0	0	0	0	0			lncRNA:CR44875	0	0	0	0	0	0
			lncRNA:CR44932	0	0	0	0	0	0	0			lncRNA:CR43252	0	0	0	0	0	0	0			lncRNA:CR40341	0.0402871	0.118737	0.458646	0.0339708	0.127543	0.0769183	0.0206587			lncRNA:CR46016	0	0	0	0	0	0	0			lncRNA:CR44559	0	0	0	0	0	0
			lncRNA:CR43905	0	0	0	0	0	0	0			CG43316	0	0	0	0	0	0	0			CG7565	2.51595	0.547713	1.13407	0.502918	0.59192	0.614457	0.419281			lncRNA:CR45945	0	0	0	0	0	0	0			lncRNA:CR46337	0	0	0	0	0	0
			lncRNA:CR44916	0	0	0	0	0	0	0			lncRNA:CR43298	0	0	0	0	0	0	0			asRNA:CR45952	0.0111341	-0.122363	0.271832	-0.0346264	0.0502005	0	-0.0226798			CG31465	0	0	0	0	0	0	0			Fuca	0	0	0	0	0	0
			Mrp4	0.0133974	-0.0190779	0.441726	-0.00539867	0.120505	0	-0.000617829			lncRNA:CR43878	0	0	0	0	0	0	0			qkr54B	1.23413	0.592028	1.81843	0.316232	0.585922	0.537558	0.177998			CG31446	0	0	0	0	0	0	0			lncRNA:CR44834	0.00425247	0.0360606	0.160628	0.0102044	0.0373805	0
			asRNA:CR43891	0	0	0	0	0	0	0			CG43246	0	0	0	0	0	0	0			Prim2	0.0150181	0.0764271	0.26758	0.0219711	0.0596282	0.0769183	0.00845323			CG31204	0	0	0	0	0	0	0			lncRNA:CR44871	0	0	0	0	0	0
			CG43993	0	0	0	0	0	0	0			CG43894	0	0	0	0	0	0	0			Su(dx)	0.994642	0.571421	1.99692	0.370988	0.703454	0.537558	0.337256			CG31103	0	0	0	0	0	0	0			lncRNA:CR46336	0	0	0	0	0	0
			lncRNA:CR43893	0	0	0	0	0	0	0			CG43325	0	0	0	0	0	0	0			lncRNA:CR45475	0.00832053	0.0200454	0.271832	0.00567245	0.0724012	0	0.00052741			CG31542	0	0	0	0	0	0	0			lncRNA:CR44870	0	0	0	0	0	0
			asRNA:CR43824	0	0	0	0	0	0	0			snRNA:U4atac	0	0	0	0	0	0	0			lncRNA:CR45630	0	0	0	0	0	0	0			lncRNA:CR46001	0	0	0	0	0	0	0			lncRNA:TS25	0	0	0	0	0	0
			lncRNA:CR43911	0	0	0	0	0	0	0			tctn	0	0	0	0	0	0	0			lap	10.8061	0.266859	0.512993	0.562052	0.513181	0.921208	0.22351			tRNA:Ala-AGC-2-6	0	0	0	0	0	0	0			CG44869	0	0	0	0	0	0
			lncRNA:CR43904	0	0	0	0	0	0	0			lncRNA:CR43304	0	0	0	0	0	0	0			lncRNA:CR45250	0	0	0	0	0	0	0			lncRNA:CR45980	0	0	0	0	0	0	0			lncRNA:CR44714	0	0	0	0	0	0
			CG43923	0	0	0	0	0	0	0			lncRNA:CR43303	0	0	0	0	0	0	0			CG42326	0.0146355	0.0839903	0.270964	0.0238437	0.0581989	0.0769217	0.0101748			Muc96D	0	0	0	0	0	0	0			lncRNA:CR44557	0	0	0	0	0	0
			CG42268	11.1178	0.248539	0.600712	0.441964	0.522186	0.503354	0.10161			asRNA:CR44896	0	0	0	0	0	0	0			Efa6	2.98268	0.731316	1.41526	0.488217	0.562805	0.691227	0.683433			CG31516	0	0	0	0	0	0	0			Ssb-c31a	22.6537	0.174504	0.421798	0.447346	0.582049	0.756462
			asRNA:CR45024	0.0125244	-0.0442533	0.441726	-0.0125228	0.114213	0	-0.00362572			lncRNA:CR43884	0	0	0	0	0	0	0			JMJD7	1.53654	0.490753	1.67419	0.391429	0.512533	0.537558	0.221059			lncRNA:CR46076	0	0	0	0	0	0	0			asRNA:CR44866	0	0	0	0	0	0
			lncRNA:CR44889	0	0	0	0	0	0	0			CR43170	0.016447	0.122004	0.220358	0.0346041	0.036238	0	0.0288803			nAChRalpha3	15.5624	0.568605	0.906217	0.67504	0.545655	0.844629	0.790338			lncRNA:CR46019	0	0	0	0	0	0	0			lncRNA:TS20	0	0	0	0	0	0
			lncRNA:CR43961	0	0	0	0	0	0	0			lncRNA:CRG	0	0	0	0	0	0	0			asRNA:CR46048	0.0114824	-0.101209	0.271832	-0.0286403	0.0545886	0.0769183	-0.0150756			GluRIIE	0	0	0	0	0	0	0			lncRNA:CR44733	0.0107654	0.102461	0.321256	0.0289944	0.0681612	0
			lncRNA:CR44895	0	0	0	0	0	0	0			CG43255	0	0	0	0	0	0	0			dsd	3.68599	0.491685	0.887407	0.456306	0.582991	0.844881	0.281737			CG31021	0	0	0	0	0	0	0			lncRNA:CR44868	0	0	0	0	0	0
			CG42789	0.0467299	0.203758	0.813323	0.0729642	0.196399	0	0.0608017			asRNA:CR44897	0	0	0	0	0	0	0			CG7309	0.225006	0.870724	2.37833	0.353322	0.517946	0.306856	0.430217			tRNA:Thr-AGT-1-7	0	0	0	0	0	0	0			rg	0.941767	0.805163	2.00716	0.43179	0.621528	0.0450859
			lncRNA:CR43458	0.00455635	-0.0213227	0.220863	-0.00603392	0.0576931	0	-0.000741096			lncRNA:CR43914	0	0	0	0	0	0	0			l(2)37Cc	6.98326	0.381938	0.720906	0.512034	0.51411	0.844904	0.284947			CG31445	0	0	0	0	0	0	0			lncRNA:CR44555	0	0	0	0	0	0
			lncRNA:CR44554	0	0	0	0	0	0	0			CG43321	0	0	0	0	0	0	0			lncRNA:CR43174	0.0149796	0.00500658	0.542868	0.00142377	0.148176	0.0769183	0.000165135			tRNA:Thr-TGT-2-5	0	0	0	0	0	0	0			lncRNA:TS26	0	0	0	0	0	0
			lncRNA:CR44893	0	0	0	0	0	0	0			ppk9	0	0	0	0	0	0	0			lncRNA:CR46322	0.024108	-0.116737	0.543663	-0.0330343	0.115096	0.153754	-0.0329022			tRNA:Asp-GTC-3-1	0	0	0	0	0	0	0			pre-mod(mdg4)-P	0	0	0	0	0	0
			CG6765	4.09034	0.341161	1.09239	0.277897	0.657095	0.185671	0.103413			lncRNA:CR43297	0	0	0	0	0	0	0			Pld	0.0384431	-0.0249568	0.796589	-0.0101141	0.171121	0	-0.0204052			CheB93b	0	0	0	0	0	0	0			lncRNA:TS6	0	0	0	0	0	0
			asRNA:CR44891	0	0	0	0	0	0	0			lncRNA:CR44983	0	0	0	0	0	0	0			Ktl	16.5951	0.30235	0.475998	0.620419	0.448556	0.990521	0.320526			CR45947	0	0	0	0	0	0	0			pre-mod(mdg4)-K	0	0	0	0	0	0
			lncRNA:CR43404	0.0160181	-0.0466589	0.170958	-0.0170579	0.0490569	0	-0.00490759			lncRNA:CR43905	0	0	0	0	0	0	0			sgg	30.0305	0.178327	0.29697	0.612668	0.493507	0.998254	0.105316			CG31205	0	0	0	0	0	0	0			lncRNA:TS27	0	0	0	0	0	0
			lncRNA:CR44721	0	0	0	0	0	0	0			lncRNA:CR43892	0	0	0	0	0	0	0			Nedd4	4.22568	0.322583	0.930725	0.507825	0.50653	0.768075	0.215092			asRNA:CR45952	0	0	0	0	0	0	0			Mi-2	4.8299	0.514925	1.01815	0.608032	0.527244	0.228472
			Tgs1	0	0	0	0	0	0	0			CG43326	0	0	0	0	0	0	0			lncRNA:CR45308	0.0341088	0.0424856	1.1089	0.0119884	0.29361	0.153822	0.00167732			CR45946	0	0	0	0	0	0	0			lncRNA:CR44867	0	0	0	0	0	0
			lncRNA:CR44722	0	0	0	0	0	0	0			lncRNA:CR43250	0	0	0	0	0	0	0			CG8097	0.599117	0.70368	2.14016	0.277337	0.554956	0.460673	0.201908			CR45948	0	0	0	0	0	0	0			lncRNA:CR44865	0	0	0	0	0	0
			asRNA:CR43471	0.007293	-0.0213227	0.220863	-0.00603392	0.0576931	0	-0.000741096			CG43345	0	0	0	0	0	0	0			Gdi	8.66434	0.290828	0.596554	0.468693	0.497618	0.844881	0.144965			lncRNA:CR45949	0	0	0	0	0	0	0			Pld	0.0112523	0.0107666	0.321256	0.00304674	0.0752816	0
			asRNA:ASTR	0.0139009	-0.00384581	0.441726	-0.00108829	0.123261	0	-4.69915e-05			lncRNA:CR44898	0	0	0	0	0	0	0			lncRNA:CR45661	0	0	0	0	0	0	0			CG31437	0	0	0	0	0	0	0			lncRNA:CR44763	0.00353319	0.0530535	0.172764	0.0139585	0.0344899	0
			asRNA:CR43429	0.00709445	-0.00660162	0.220863	-0.00186813	0.0610097	0	-6.91939e-05			CG43371	0	0	0	0	0	0	0			Nost	0.125853	0.224216	1.34228	0.110754	0.339832	0.230672	0.0748628			CCY	0	0	0	0	0	0	0			Ctl2	1.56736	0.617669	1.51281	0.520493	0.47485	0.0450859
			Spn	27.7269	0.158058	0.445284	0.546499	0.517374	0.672219	0.132742			CG43354	0	0	0	0	0	0	0			l(2)03659	0.228951	0.63976	2.21321	0.321747	0.508256	0.383741	0.487533			lncRNA:CR46017	0	0	0	0	0	0	0			lncRNA:CR45593	0.0170993	0.0543125	0.308973	0.016979	0.0714516	0
			shep	305.083	0.0999803	0.154831	0.795238	0.366447	0.820614	0.0896909			ct	6.79616	0.52972	0.859374	0.581831	0.305834	0.636814	0.861389			lncRNA:CR44943	0.116486	0.0959295	0.668061	0.0578351	0.183284	0.153803	0.0312165			tRNA:Gln-TTG-1-2	0	0	0	0	0	0	0			lncRNA:CR44851	0	0	0	0	0	0
			CG14966	2.38479	0.3557	1.79549	0.266746	0.680261	0.185671	0.0790683			lncRNA:CR43258	0	0	0	0	0	0	0			lncRNA:CR45657	0	0	0	0	0	0	0			lncRNA:CR45935	0	0	0	0	0	0	0			mt:ND3	7.40275	0.516267	1.08006	0.527773	0.562972	0.343216
			snoRNA:gcl-a	0.0112377	-0.0175773	0.441726	-0.00497404	0.120167	0	-0.000612266			asRNA:CR43891	0	0	0	0	0	0	0			Pih1D1	2.64652	0.435448	1.06603	0.461536	0.565044	0.768056	0.342379			lncRNA:CR46078	0	0	0	0	0	0	0			lncRNA:TS4	0	0	0	0	0	0
			Mpc1	7.53791	0.394371	0.757496	0.372964	0.599987	0.367765	0.250248			bves	4.50089	0.448823	0.844842	0.552464	0.507386	0.686466	0.385241			dpr1	15.1407	0.528509	1.20422	0.418253	0.489083	0.614098	0.311975			CR45934	0	0	0	0	0	0	0			lncRNA:CR46271	0.0652542	0.272712	1.55936	0.0804602	0.378041	0
			lncRNA:CR44478	0.00619997	-0.00521066	0.220863	-0.00147452	0.0613236	0	-4.29998e-05			asRNA:CR43257	0	0	0	0	0	0	0			nes	1.93941	0.538497	1.29243	0.397079	0.5209	0.537558	0.26554			tRNA:Ala-AGC-2-9	0	0	0	0	0	0	0			lncRNA:CR45547	0	0	0	0	0	0
			CG34124	0.0179058	0.177051	0.433338	0.0510512	0.085373	0	0.0293496			asRNA:CR43299	0	0	0	0	0	0	0			lncRNA:CR45632	0	0	0	0	0	0	0			lncRNA:CR45937	0	0	0	0	0	0	0			CG4806	2.73635	0.555707	1.07421	0.552531	0.596903	0.0450859
			lncRNA:CR46062	0.0563975	0.401383	0.77907	0.137988	0.148552	0	0.118252			CG13369	3.13318	0.383427	0.93413	0.453864	0.606466	0.561622	0.17996			Idh3a	29.0591	0.154756	0.342825	0.647355	0.359042	0.95464	0.0971457			CG31525	0	0	0	0	0	0	0			asRNA:CR44850	0	0	0	0	0	0
			lncRNA:CR45332	16.5616	0.727394	1.14397	0.957745	0.389785	0.565481	1.10865			lncRNA:CR43917	0	0	0	0	0	0	0			GCS2alpha	7.33838	0.320449	0.649556	0.507607	0.542722	0.844904	0.170937			lncRNA:CR45936	0	0	0	0	0	0	0			lncRNA:CR45519	0.00389244	0.0511907	0.160628	0.014486	0.0340891	0
			RpL13A	92.706	0.111254	0.215748	0.624689	0.55617	0.83566	0.110204			CG43267	0	0	0	0	0	0	0			CG33229	4.73055	0.354021	0.692192	0.500941	0.522649	0.921406	0.262791			tRNA:Ala-AGC-2-10	0	0	0	0	0	0	0			lncRNA:CR44748	0.00422783	0.0243116	0.160628	0.0068797	0.0399862	0
			lncRNA:CR45048	0.0315276	-0.123168	0.375007	-0.0552836	0.0701217	0	-0.0892975			lncRNA:CR43918	0	0	0	0	0	0	0			lncRNA:CR45254	0	0	0	0	0	0	0			CG31524	0	0	0	0	0	0	0			lncRNA:CR46148	0.0237014	0.112742	0.158395	0.0323535	0.0216637	0
			CG43711	0	0	0	0	0	0	0			lncRNA:CR43357	0	0	0	0	0	0	0			CG32706	4.27368	0.464013	1.04986	0.517776	0.547747	0.614457	0.353813			lncRNA:CR45938	0	0	0	0	0	0	0			asRNA:CR44849	0	0	0	0	0	0
			CG43666	0	0	0	0	0	0	0			pb	0.106401	-0.21476	0.313596	-0.162592	0.051162	0.102761	-0.619155			CG42235	0.0166947	0.0350896	0.543077	0.00993888	0.145922	0.0769183	0.000822985			lncRNA:CR45939	0	0	0	0	0	0	0			lncRNA:CR44852	0	0	0	0	0	0
			Mst36Fa	0.0477871	0.372555	1.08502	0.10769	0.229233	0	0.0664839			lncRNA:CR43899	0	0	0	0	0	0	0			CG6330	9.67662	0.326991	0.688795	0.463943	0.532669	0.768075	0.217155			tRNA:Leu-TAA-1-1	0	0	0	0	0	0	0			lncRNA:CR44848	0	0	0	0	0	0
			lncRNA:CR44971	0	0	0	0	0	0	0			asRNA:CR43877	0	0	0	0	0	0	0			Bx	11.9171	0.254686	0.835565	0.395539	0.448207	0.768111	0.0612908			asRNA:CR45944	0	0	0	0	0	0	0			lncRNA:CR44853	0	0	0	0	0	0
			CG43710	0	0	0	0	0	0	0			CG43179	0.0117724	0.0487444	0.218862	0.0139198	0.0514847	0	0.00410435			shi	75.4833	0.148331	0.214327	0.771546	0.442933	0.998254	0.151461			CG31515	0	0	0	0	0	0	0			CR45548	0	0	0	0	0	0
			asRNA:CR44972	0	0	0	0	0	0	0			lncRNA:CR43912	0	0	0	0	0	0	0			AP-2alpha	6.97821	0.251894	0.622769	0.562274	0.482176	0.844904	0.224239			asRNA:CR46018	0	0	0	0	0	0	0			asRNA:CR44847	0	0	0	0	0	0
			lncRNA:CR43278	0.0166459	0.0654515	0.441726	0.0185215	0.101883	0	0.0125159			CG11110	2.50216	0.490675	1.29842	0.433703	0.556594	0.499247	0.293006			snoRNA:Me28S-U3344b	0.00643408	0.0200454	0.271832	0.00567245	0.0724012	0	0.00052741			PH4alphaNE3	0	0	0	0	0	0	0			lncRNA:CR44846	0	0	0	0	0	0
			lncRNA:CR43660	0	0	0	0	0	0	0			asRNA:CR43876	0	0	0	0	0	0	0			tw	0.0196885	0.0755071	0.293611	0.0197821	0.0613115	0.0769004	0.00743854			lncRNA:CR45940	0	0	0	0	0	0	0			lncRNA:CR44861	0	0	0	0	0	0
			CG14073	4.52727	0.245529	1.09553	0.402203	0.551729	0.185671	0.15749			CG42560	0	0	0	0	0	0	0			rad	35.1169	0.347722	0.919587	0.457905	0.506861	0.921485	0.112853			CG31013	0	0	0	0	0	0	0			5.8SrRNA-Psi:CR45849	0.0101518	0.0894692	0.321087	0.0253294	0.0709736	0
			CG43709	0	0	0	0	0	0	0			CG43896	0	0	0	0	0	0	0			lncRNA:CR45253	0	0	0	0	0	0	0			tRNA:Thr-CGT-1-1	0	0	0	0	0	0	0			CR44839	0	0	0	0	0	0
			lncRNA:CR44663	0.692097	0.136019	1.20463	0.0867575	0.426951	0.0624704	0.0296785			lncRNA:CR45913	0	0	0	0	0	0	0			CG4679	1.64726	0.617668	1.58031	0.422725	0.630868	0.537558	0.394049			CG31464	0	0	0	0	0	0	0			lncRNA:CR45699	0.025767	0.079341	0.0879985	0.0409826	0.0166936	0
			CR43688	0	0	0	0	0	0	0			lncRNA:CR44858	0	0	0	0	0	0	0			nvd	0.0282948	-0.0872736	0.814909	-0.0246875	0.196122	0.0769183	-0.0218568			tRNA:Gln-TTG-1-3	0	0	0	0	0	0	0			Cdk12	10.5137	0.348559	0.545966	0.757079	0.453507	0.409731
			CG43691	0	0	0	0	0	0	0			asRNA:CR43898	0	0	0	0	0	0	0			sle	0.573042	0.553514	2.56769	0.27379	0.73548	0.537558	0.152502			CG31010	0	0	0	0	0	0	0			lncRNA:CR44842	0	0	0	0	0	0
			lncRNA:CR43715	0	0	0	0	0	0	0			lncRNA:CR43289	0	0	0	0	0	0	0			CG42404	2.56877	0.339427	1.00943	0.359248	0.558403	0.691227	0.15215			asRNA:CR46091	0	0	0	0	0	0	0			asRNA:CR44509	0	0	0	0	0	0
			CR43687	0	0	0	0	0	0	0			CR34285	0	0	0	0	0	0	0			CG46025	0.0426507	-0.215465	0.202836	-0.0817123	0.0221629	0	-0.116444			tRNA:Ala-AGC-1-1	0	0	0	0	0	0	0			lncRNA:CR44761	0.00890773	0.0408635	0.160628	0.0115636	0.0363267	0
			lncRNA:CR44555	0	0	0	0	0	0	0			CG43288	0	0	0	0	0	0	0			lncRNA:CR45252	0	0	0	0	0	0	0			CG31538	0	0	0	0	0	0	0			lncRNA:CR46328	0	0	0	0	0	0
			lncRNA:CR43493	0.27657	0.468796	2.04353	0.163408	0.517066	0.0612565	0.062303			CG43290	0	0	0	0	0	0	0			CheB53a	0.00750907	0.0150443	0.271246	0.00426643	0.0735207	0.0769183	0.000295575			nxf4	0	0	0	0	0	0	0			asRNA:CR44840	0	0	0	0	0	0
			CG43659	0	0	0	0	0	0	0			CG34453	0.00691387	0.0172099	0.25503	0.00421762	0.0591374	0.0624689	0.000413346			Mpc1	4.42386	0.368903	0.881538	0.500043	0.595766	0.691235	0.249737			CG31016	0	0	0	0	0	0	0			lncRNA:CR46326	0	0	0	0	0	0
			speck	8.45358	0.3216	1.22305	0.309567	0.623993	0.347718	0.0290053			asRNA:CR43903	0	0	0	0	0	0	0			Cap-H2	0.888308	0.632291	1.9821	0.375835	0.662776	0.537558	0.374174			tRNA:Ala-AGC-2-5	0	0	0	0	0	0	0			CG45546	0	0	0	0	0	0
			slpr	11.1572	0.357606	0.573	0.756503	0.399432	0.500729	0.293198			CG42559	0	0	0	0	0	0	0			sra	13.8183	0.21234	0.477396	0.518421	0.571137	0.998254	0.166642			asRNA:CR46092	0	0	0	0	0	0	0			lncRNA:CR45516	0	0	0	0	0	0
			snoRNA:nop5-x16-a	0.0079716	-0.0195048	0.220863	-0.00551949	0.0581018	0	-0.000618116			Pka-C1	59.6031	0.15875	0.302159	0.663729	0.38929	0.949471	0.191743			Sdc	49.211	0.161349	0.264151	0.551789	0.478427	0.998254	0.0935636			CG31093	0	0	0	0	0	0	0			CG7945	23.6582	0.160758	0.385576	0.461803	0.564774	0.809749
			lncRNA:CR43822	0	0	0	0	0	0	0			CG43294	0	0	0	0	0	0	0			fne	113.746	0.131808	0.185583	0.770506	0.463607	0.998254	0.134649			PH4alphaPV	0	0	0	0	0	0	0			lncRNA:TS3	0	0	0	0	0	0
			CR43669	0.0129016	0.0853833	0.441726	0.0241618	0.106184	0	0.0131343			lncRNA:CR44944	0	0	0	0	0	0	0			CG42288	0.00750907	0.0150443	0.271246	0.00426643	0.0735207	0.0769183	0.000295575			PH4alphaSG1	0	0	0	0	0	0	0			lncRNA:CR44855	0	0	0	0	0	0
			chinmo	80.1776	0.103256	0.210455	0.642023	0.573851	0.871387	0.0984605			lncRNA:CR44899	0	0	0	0	0	0	0			Catsup	1.29927	0.560973	1.6956	0.393708	0.604877	0.614457	0.326534			lncRNA:CR46095	0	0	0	0	0	0	0			lncRNA:CR44508	0	0	0	0	0	0
			lncRNA:CR43655	0	0	0	0	0	0	0			CG34287	0	0	0	0	0	0	0			Kap3	4.15065	0.28785	0.788824	0.356184	0.593058	0.691227	0.0964919			tRNA:Pro-TGG-1-4	0	0	0	0	0	0	0			lncRNA:CR46247	0.00416739	-0.0295154	0.160628	-0.00835229	0.0388277	0
			RpL31	149.381	0.118334	0.175954	0.579842	0.466026	0.767428	0.0895157			CG43919	0	0	0	0	0	0	0			CR43170	0.0202424	0.150159	0.271209	0.0425896	0.0446006	0	0.035545			CG31068	0	0	0	0	0	0	0			eIF5	6.81534	0.364136	0.773577	0.588072	0.551406	0.258455
			lncRNA:CR44994	0	0	0	0	0	0	0			CG1636	5.12441	0.4223	0.813523	0.421699	0.39504	0.624042	0.231619			lncRNA:CR44779	0.0135522	-0.0065637	0.543077	-0.0018482	0.14557	0.0769183	-0.000318654			tRNA:Ala-AGC-2-7	0	0	0	0	0	0	0			lncRNA:CR46056	0	0	0	0	0	0
			lncRNA:CR43661	0	0	0	0	0	0	0			CG34194	0	0	0	0	0	0	0			conv	0.00918559	0.0200454	0.271832	0.00567245	0.0724012	0	0.00052741			ATPsynepsilonL	0	0	0	0	0	0	0			CG13907	9.0101	0.410749	0.690748	0.736498	0.470138	0.290908
			lncRNA:CR43713	0	0	0	0	0	0	0			lncRNA:CR43260	0	0	0	0	0	0	0			CG42579	0.00832053	0.0200454	0.271832	0.00567245	0.0724012	0	0.00052741			CG31091	0	0	0	0	0	0	0			lncRNA:CR46057	0	0	0	0	0	0
			snRNA:LU	0	0	0	0	0	0	0			asRNA:CR44976	0	0	0	0	0	0	0			Bsg	51.4155	0.149917	0.234106	0.694584	0.442407	0.998254	0.123919			CG1239	0.369695	1.13949	1.64257	0.632706	0.290053	0	0.791042			Akt	1.29986	0.772566	1.76347	0.601689	0.499775	0.0450859
			lncRNA:CR43652	0	0	0	0	0	0	0			lncRNA:CR43270	0	0	0	0	0	0	0			lncRNA:CR45054	3.22363	0.370234	0.893762	0.41713	0.572897	0.691227	0.232007			CR43275	0.0998901	0.298708	0.900572	0.110562	0.246708	0	0.0390396			CG42518	0.160263	0.569711	1.81241	0.205804	0.417251	0
			lncRNA:CR44966	0	0	0	0	0	0	0			CG34193	0	0	0	0	0	0	0			lncRNA:CR45633	0	0	0	0	0	0	0			tRNA:Thr-AGT-1-3	0	0	0	0	0	0	0			asRNA:CR46058	0	0	0	0	0	0
			lncRNA:CR44965	0	0	0	0	0	0	0			CG43277	0	0	0	0	0	0	0			TTLL12	1.42134	0.58533	1.68049	0.472783	0.558164	0.614457	0.425902			asRNA:CR45929	0	0	0	0	0	0	0			lncRNA:CR46053	0	0	0	0	0	0
			lncRNA:CR43721	0	0	0	0	0	0	0			CG43915	0	0	0	0	0	0	0			lncRNA:CR45634	0	0	0	0	0	0	0			tRNA:Ala-AGC-2-2	0	0	0	0	0	0	0			lncRNA:CR44857	0	0	0	0	0	0
			lncRNA:CR44948	0.0455722	0.138202	0.337553	0.0507568	0.0855901	0	0.0229706			asRNA:CR43875	0	0	0	0	0	0	0			Fur2	2.59386	0.500579	1.02089	0.415097	0.607527	0.614457	0.332729			CG31546	0	0	0	0	0	0	0			Btk29A	10.4167	0.41081	0.895564	0.651164	0.434941	0.39282
			asRNA:CR44995	0	0	0	0	0	0	0			lncRNA:CR42721	0.0541006	0.0295196	0.531012	0.0121683	0.146029	0.0624989	0.00375447			lncRNA:CR45636	0	0	0	0	0	0	0			CG31008	0	0	0	0	0	0	0			lncRNA:CR44856	0	0	0	0	0	0
			sigmar	7.2979	0.276954	0.790336	0.421677	0.589363	0.248155	0.210331			CG43271	0	0	0	0	0	0	0			lncRNA:CR45637	0	0	0	0	0	0	0			asRNA:CR46096	0	0	0	0	0	0	0			asRNA:CR46054	0	0	0	0	0	0
			mt:Cyt-b	466.264	0.200275	0.156684	1.56724	0.303263	0.636241	0.60478			CG34265	0	0	0	0	0	0	0			CG30349	0.516725	0.677046	2.56781	0.313149	0.699481	0.460642	0.280059			ltl	4.02723	2.30784	1.85495	1.05826	0.271237	0.0461436	5.04955			CG46059	0	0	0	0	0	0
			lncRNA:CR44964	0	0	0	0	0	0	0			lncRNA:CR43913	0	0	0	0	0	0	0			ringer	21.2599	0.17065	0.343183	0.518146	0.481197	0.998254	0.0945632			asRNA:CR46097	0	0	0	0	0	0	0			lncRNA:CR44510	0	0	0	0	0	0
			Patronin	5.17978	0.551453	0.80943	0.766683	0.561773	0.210567	0.659112			lncRNA:CR43262	0	0	0	0	0	0	0			lncRNA:CR45635	0	0	0	0	0	0	0			CR31562	0	0	0	0	0	0	0			wupA	0.00425415	-0.016643	0.160628	-0.00470964	0.0417035	0
			CG43679	0.00938913	0.0706622	0.220863	0.019996	0.0468135	0	0.00886872			Pur-alpha	46.4656	0.123064	0.304463	0.815808	0.413189	0.889195	0.268882			CG14805	1.12316	0.494834	1.8324	0.288673	0.705138	0.537558	0.145983			lncRNA:CR46090	0	0	0	0	0	0	0			lncRNA:CR46063	0	0	0	0	0	0
			MME1	0.897406	0.391855	2.09213	0.182911	0.604474	0.185671	0.0721287			CG34298	0	0	0	0	0	0	0			lncRNA:CR45642	0	0	0	0	0	0	0			asRNA:CR46089	0	0	0	0	0	0	0			CR46187	0	0	0	0	0	0
			lncRNA:CR43714	0	0	0	0	0	0	0			lncRNA:CR43911	0	0	0	0	0	0	0			a6	1.14899	0.323942	1.75216	0.213368	0.54249	0.537558	-0.0689756			CG31551	0	0	0	0	0	0	0			lncRNA:CR44677	0.00890773	0.0408635	0.160628	0.0115636	0.0363267	0
			EloA	1.39773	0.837107	1.86747	0.606397	0.548011	0.185671	1.05945			lncRNA:CR43862	0	0	0	0	0	0	0			Ranbp21	0.295928	0.523391	2.55235	0.194807	0.597013	0.383757	0.178827			lncRNA:CR46086	0	0	0	0	0	0	0			lncRNA:CR44931	0	0	0	0	0	0
			asRNA:CR43614	0.00683794	-0.0461808	0.220863	-0.0130683	0.0521485	0	-0.00363157			CG43333	0	0	0	0	0	0	0			lncRNA:CR46085	0.0072271	-0.0332996	0.271832	-0.00942313	0.0694233	0	-0.00148355			lncRNA:CR46088	0	0	0	0	0	0	0			lncRNA:CR44928	0	0	0	0	0	0
			CR43275	0.0262208	0.0357227	0.405559	0.00706822	0.0905044	0	0.00873687			CR43276	0	0	0	0	0	0	0			lncRNA:CR45644	0	0	0	0	0	0	0			CG44270	0	0	0	0	0	0	0			beta-Spec	7.82727	0.419962	0.729014	0.605523	0.5386	0.354459
			Yeti	43.0775	0.106464	0.289311	0.49859	0.513458	0.877743	0.0518209			CG44954	0	0	0	0	0	0	0			put	4.43385	0.314018	0.78488	0.423611	0.571489	0.844881	0.172108			CG31036	0	0	0	0	0	0	0			lncRNA:CR45559	0.0239299	0.107244	0.439878	0.0397644	0.09632	0
			lncRNA:CR43717	0	0	0	0	0	0	0			asRNA:CR43908	0	0	0	0	0	0	0			CG12155	1.33615	0.590828	1.65811	0.286095	0.605595	0.614457	0.205931			lncRNA:CR46087	0	0	0	0	0	0	0			asRNA:CR46034	0	0	0	0	0	0
			BubR1	0.0499824	0.174525	1.0433	0.0531985	0.261908	0.0612565	0.0206128			Rpp14a	0	0	0	0	0	0	0			Ir7d	0.00387424	0.00668012	0.271431	0.00189314	0.0754127	0.0769183	5.75292e-05			CG31115	0	0	0	0	0	0	0			lncRNA:CR44930	0	0	0	0	0	0
			lncRNA:CR45014	0.00551261	-0.0184439	0.220863	-0.00521927	0.0583405	0	-0.00055166			Vml	0	0	0	0	0	0	0			Vha26	64.6664	0.134609	0.23263	0.576626	0.549	0.998254	0.0770229			CG31559	0	0	0	0	0	0	0			lncRNA:CR44929	0	0	0	0	0	0
			CG43428	0.0101978	-0.0917426	0.218783	-0.0262082	0.0421859	0	-0.0156617			CG43312	0	0	0	0	0	0	0			shrb	8.19663	0.238156	0.563716	0.46515	0.590422	0.921411	0.173403			Ppi1	0	0	0	0	0	0	0			asRNA:CR46251	0.00511422	-0.00124929	0.160628	-0.000353524	0.0451725	0
			lncRNA:CR43719	0	0	0	0	0	0	0			asRNA:CR44975	0	0	0	0	0	0	0			Glut4EF	48.0319	0.148527	0.22592	0.70322	0.485316	0.989594	0.128839			asRNA:CR45927	0	0	0	0	0	0	0			asRNA:CR45604	0.0110208	0.0265574	0.321256	0.00751523	0.0739688	0
			OtopLa	46.9282	0.210479	0.29726	1.13158	0.34518	0.628153	0.364071			lncRNA:CR43274	0	0	0	0	0	0	0			Nplp2	0.00622254	-0.0896145	0.271667	-0.0253745	0.0570384	0	-0.01164			Osi16	0	0	0	0	0	0	0			Lint-1	1.18148	0.923068	1.88219	0.604817	0.491356	0
			lncRNA:CR44967	0	0	0	0	0	0	0			lncRNA:CR44924	0	0	0	0	0	0	0			CG18787	0.537533	0.89881	2.23308	0.491521	0.533131	0.384457	0.665502			Npc1b	0	0	0	0	0	0	0			lncRNA:CR46088	0.00940901	0.0874473	0.321256	0.0247459	0.0714089	0
			lncRNA:CR43718	0	0	0	0	0	0	0			CG43350	0	0	0	0	0	0	0			CG12091	17.6467	0.199399	0.406465	0.493484	0.631889	0.998254	0.137092			lncRNA:CR46098	0	0	0	0	0	0	0			lncRNA:CR46080	0.0138956	0.0874473	0.321256	0.0247459	0.0714089	0
[truncated: 16,124 more rows]
[truncated: 19 more columns]

## Sheet: Ranked_Genes_Fly
in affected neurons	ranked gene lists		LRRK2G2019S	PINK1P399L	Rab39BG192R	AuxR927G	SynjR258Q		sorted by median		LRRK2G2019S	PINK1P399L	Rab39BG192R	AuxR927G	SynjR258Q		median rank
[truncated: 17,498 more rows]

[truncated: 2 more sheets: Overlap_Human_Fly_DEG_annotated, SynGO onto w annot ]
